# Supplementary material
Source: Research Square preprint supplement (doi:10.21203/rs.3.rs-9198207/v1)
Supplement: Supplementary file 1 [file b48265d51001176ce3ea178b.xlsx]

## Sheet: List_supplementary_tables
SUPPLEMENTARY TABLES	Description
Supplementary Table 1	Descriptive characteristics of the study population from the INMA-Sabadell and BiSC cohort
Supplementary Table 2	List of steroid hormone names, abbreviations, hormone family and LOD assessed in urine samples
Supplementary Table 3	List of metabolic indicators and formulas
Supplementary Table 4	Results of statistical models in the INMA Sabadell and BiSC cohorts
Supplementary Table 4-A (ST4-A)	INMA-Sabadell: Linear mixed-effects models for prenatal steroid hormone exposure-neurodevelopment associations (Primary Analysis, Full population)
Supplementary Table 4-B (ST4-B)	INMA-Sabadell: Linear mixed-effects models for prenatal steroid hormone exposure-neurodevelopment associations with residual diagnostics
Supplementary Table 4-C (ST4-C)	INMA-Sabadell: Sex stratified linear mixed-effects models for prenatal steroid hormone exposure-neurodevelopment associations
Supplementary Table 4-D (ST4-D)	INMA-Sabadell: Sex stratified linear mixed-effects models for prenatal steroid hormone exposure-neurodevelopment associations with residual diagnostics
Supplementary Table 4-E (ST4-E)	INMA-Sabadell: Linear mixed-effects models testing exposure-by-sex interactions for prenatal steroid hormone exposures on neurodevelopmental outcomes
Supplementary Table 4-F (ST4-F)	INMA-Sabadell: Sensitivity models of prenatal steroid hormone exposure - neurodevelopment associations, further adjusted for breastfeeding duration
Supplementary Table 4-G (ST4-G)	BiSC: Linear regression models for prenatal steroid hormone exposures and early-life neurodevelopmental outcomes (Secondary Analysis, Full Population)

## Sheet: ST1
	ST1: Descriptive characteristics of the study population from the INMA-Sabadell and BiSC cohort
Descriptive characteristics of the study population from the INMA-Sabadell cohort			Descriptive characteristics of the study population from the BiSC cohort
Variable	N = 500		Variable	N = 556
Maternal age	Mean = 30 (SD = 4); Median = 30 [Min = 17, Max = 42]		Maternal age	Mean = 34.6 (SD = 4.3); Median = 34.8 [Min = 19.0, Max = 45.7]
Missing	1		Sex of the child
Sex of the child			Male	N = 259 (47%)
Female	N = 241 (48%)		Female	N = 297 (53%)
Male	N = 259 (52%)		Maternal BMI at 12 weeks of pregnancy	Mean = 23.9 (SD = 4.0); Median = 23.0 [Min = 15.9, Max = 40.3]
Maternal BMI before pregnancy	Mean = 23.9 (SD = 4.6); Median = 22.7 [Min = 17.0, Max = 53.8]		Missing	42
Maternal education			Maternal education
Primary or without education	N = 136 (27%)		Secondary or less	N = 143 (26%)
Secondary	N = 204 (41%)		University	N = 413 (74%)
University	N = 157 (32%)		Maternal ethnicity
Missing	3		European	N = 446 (80%)
Maternal origin (based on country of birth)			Latin America	N = 110 (20%)
European	N = 457 (93%)		Smoking during pregnancy
Latin America	N = 36 (7.3%)		non-smoker	N = 505 (93%)
Missing	7		smoker (sustained or non-sustained)	N = 39 (7.2%)
Maternal smoking			Missing	12
Ex-smoker (before/during pregnancy)	N = 213 (43%)		Passive smoking during pregnancy	N = 232 (43%)
Never smoked	N = 210 (43%)		Missing	21
Smoker	N = 67 (14%)		Parity
Missing	10		multiparous	N = 228 (41%)
Someone smokes at home during pregnancy	N = 199 (40%)		nulliparous	N = 328 (59%)
Missing	5		Birthweight (grams)	Mean = 3,317 (SD = 433); Median = 3,320 [Min = 1,609, Max = 4,760]
Parity			Gestational age at birth (weeks)	Mean = 39.93 (SD = 1.16); Median = 39.99 [Min = 35.28, Max = 42.85]
multiparous	N = 216 (43%)		Breastfeeding at 18 months	N = 224 (49%)
nulliparous	N = 282 (57%)		Missing	102
Missing	2		Nursery attendance
Birthweight (grams)	Mean = 3,262 (SD = 416); Median = 3,300 [Min = 1,750, Max = 4,480]		Never attended nursery/stopped	N = 95 (21%)
Missing	1		Started after 12 months	N = 135 (30%)
Gestational age at birth (weeks)	Mean = 39.75 (SD = 1.37); Median = 39.86 [Min = 32.43, Max = 42.29]		Started before 12 months	N = 224 (49%)
Missing	7		Missing	102
Breastfeeding duration			Hospital of recruitment
0	N = 36 (7.3%)		MT	N = 40 (7.2%)
>0-16 weeks	N = 130 (26%)		SJD	N = 197 (35%)
>16-24 weeks	N = 81 (16%)		SP	N = 319 (57%)
>24 weeks	N = 249 (50%)
Missing	4
Nursery attendance at 1 year	N = 149 (31%)
Missing	18

## Sheet: ST2
ST2: Full steroid hormone names, abbreviations, hormone family and LOD assessed in urine samples
Metabolite	Metabolite Name	Hormone	Family	LOD (ng/mL)
DHEA-S	DHEA-sulfate	DHEA	Androgen	1
5AD-diS_1	5-androsten-3b17b-diol-diSulfate	DHEA	Androgen	1
5AD-diS_2	5-androsten-3a17b-diol-diSulfate	DHEA	Androgen	1
16OHDHEA-diS_1	16b-hydroxy-DHEA-diSulfate	DHEA	Androgen	5
16OHDHEA-diS_2	16a-hydroxy-DHEA-diSulfate	DHEA	Androgen	5
epiAN-S	epiandrosterone-Sulfate	DHEA	Androgen	1
16OH-DHEAS_1	16b-hydroxy-DHEA-Sulfate	DHEA	Androgen	5
16OH-DHEAS_2	16a-hydroxy-DHEA-Sulfate	DHEA	Androgen	5
T-G	Testosterone-Glucuronide	Testosterone	Androgen	2
T-S	Testosterone-Sulfate	Testosterone	Androgen	2
AN-S	Androsterone-Sulfate	Testosterone	Androgen	1
Etio-S	Etiocholanolone-Sulfate	Testosterone	Androgen	1
Andros-G	Androsterone-Glucuronide	Testosterone	Androgen	10
Etio-G	Etiocholanolone-Glucuronide	Testosterone	Androgen	10
B-S	Corticosterone-Sulfate	Cortiscosterone	Corticosteroid	5
A-S	11-dehydrocorticosterone-Sulfate	Cortiscosterone	Corticosteroid	5
F-S	Cortisol-Sulfate	Cortisol	Corticosteroid	5
E-S	Cortisone-Sulfate	Cortisol	Corticosteroid	5
E-G	Cortisone-Glucuronide	Cortisol	Corticosteroid	5
F-G	Cortisol-Glucuronide	Cortisol	Corticosteroid	5
20DHE-G	20dihydrocortisone-Glucuronide	Cortisol	Corticosteroid	5
20aDHF-G	20a-dihydrocortisol-Glucuronide	Cortisol	Corticosteroid	5
20bDHF-G	20b-dihydrocortisol-Glucuronide	Cortisol	Corticosteroid	5
THE-G	Tetrahydrocortisone-Glucuronide	Cortisol	Corticosteroid	5
Cortolone-G_1	20a-Cortolone-Glucuronide	Cortisol	Corticosteroid	5
Cortolone-G_2	20b-Cortolone-Glucuronide	Cortisol	Corticosteroid	5
E2-S	Estradiol-Sulfate	Estradiol	Estrogen	2
E1-G	Estrone-Glucuronide	Estradiol	Estrogen	10
E1-S	Estrone-Sulfate	Estradiol	Estrogen	2
E3-G	Estriol-Glucuronide	Estriol	Estrogen	50
E3-SG	Estriol-Sulfoglucoconjugated	Estriol	Estrogen	10
E3-S	Estriol-Sulfate	Estriol	Estrogen	2
E4-SG	Estetrol-Sulfoglucoconjugated	Estriol	Estrogen	2
5PD-20one-S	17-hydroxy-5-pregnenolone-3-sulfate	17-hydroxy-pregnenolone	Progestogen	50
PT-diS	Pregnantriol-diSulfate	17-hydroxy-progesterone	Progestogen	2
PT-G	Pregnantriol-Glucuronide	17-hydroxy-progesterone	Progestogen	200
5PD-diS	5-Pregnendiol-DiSulfate	Pregnenolone	Progestogen	5
21OH-5P-diS	21-Hydroxypregnenolone-DiSulfate	Pregnenolone	Progestogen	5
5PD-SG	5-Pregnendiol-Sulfoglucoconjugated	Pregnenolone	Progestogen	50
5PD-G	5-Pregnendiol-Glucuronide	Pregnenolone	Progestogen	200
PD-diS_1	5a-Pregnan-3b,20a-diol-DiSulfate	Progesterone	Progestogen	5
PD_diS_2	5a-Pregnan-3a,20a-diol-DiSulfate	Progesterone	Progestogen	5
PD-diS_3	5b-Pregnan-3a,20a-diol-DiSulfate	Progesterone	Progestogen	5
PD-SG_1	5a-Pregnandiol-3b-sulfate-20a-Glucuronide	Progesterone	Progestogen	50
PD-SG_2	Pregnandiol-sulfoglucoconjugate (unknown stereochemistry)	Progesterone	Progestogen	50
PD-SG_4	Pregnandiol-sulfoglucoconjugate (unknown stereochemistry)	Progesterone	Progestogen	50
PD-SG_5	Pregnandiol-sulfoglucoconjugate (unknown stereochemistry)	Progesterone	Progestogen	50
PD-S_1	5a-Pregnan-3b20a-diol-20-Sulfate	Progesterone	Progestogen	50
PD-S_2	5b-Pregnan-3a20a-diol-20-Sulfate	Progesterone	Progestogen	50
PD-G	Pregnandiol-Glucuronide	Progesterone	Progestogen	200

## Sheet: ST3
ST3: List of metabolic indicators and formulas
Metabolic Indicators
Sum by hormone and hormone family	Formula
Androgens metabolites
Testosterone production	∑Testosterone = sum of T-G, T-S, AN-S, Etio-S, Andros-G, Etio-G
DHEA production	∑DHEA = sum of DHEA-S, 5AD-diS_1, 5AD-diS_2
Androgens production	∑Androgen = ∑Testosterone + ∑DHEA
Corticosteroid metabolites
Corticosterone production	∑Corticosterone = sum of B-S, A-S
Cortisol production	∑Cortisol = sum of F-S, F-G, 20aDHF-G, 20bDHF-G
Cortisone production	∑Cortisone = sum of E-S, E-G, 20DHE-G, THE-G, Cortolone-G_1, Cortolone-G_2
Corticosteroid production	∑Corticosteroid = ∑Cortisol + ∑Cortisone + ∑Corticosterone
Estrogen metabolites
Estradiol production	∑Estradiol = sum of E2-S, E1-G, E1-S
Estriol production	∑Estriol = sum of E3-G, E3-SG, E3-S, E4-SG
Estrogen production	∑Estrogen = ∑Estriol + ∑Estradiol
Progestogen metabolites
Progesterone production	∑Progesterone = sum of PD-diS_1, PD_diS_2, PD-diS_3, PD-SG_1, PD-SG_2, PD-SG_4, PD-SG_5, PD-S_1, PD-S_2, PD-G
Pregnenolone production	∑Pregnenolone = sum of 5PD-diS, 21OH-5P-diS, 5PD-SG, 5PD-G
17-hydroxy-progesterone production	∑17-hydroxy-progesterone = Sum of PT-diS, PT-G
17-hydroxy-pregnenolone production	∑17-hydroxy-pregnenolone = 5PD-20one-S
Progestogen production	∑Progestogen = ∑Progesterone + ∑Pregnenolone + ∑17-hydroxy-progesterone + ∑17-hydroxy-pregnenolone
Enzymatic activity	Formula
11b-hydroxysteroid dehydrogenase (11bHSD) activity
11b-hydroxysteroid dehydrogenase type 1 activity (11bHSD-1)	∑ (F-S, F-G, 20aDHF-G, 20bDHF-G) / ∑ (E-S, E-G, 20DHE-G, THE-G, Cortolone-G_1, Cortolone-G_2)
11b-hydroxysteroid dehydrogenase type 2 activity (11bHSD-2)	∑ (E-S, E-G, 20DHE-G, THE-G, Cortolone-G_1, Cortolone-G_2) / ∑ (F-S, F-G, 20aDHF-G, 20bDHF-G)
20 reductase activity
20α-reductase (F)	∑ (20aDHF-G) / ∑ (F-S, F-G)
20b-reductase (F)	∑ (20bDHF-G) / ∑ (F-S, F-G)
5α - reductase activity (SRD5As)
AN/ Etio	∑ (AN-S, Andros-G) / ∑ (Etio-S, Etio-G)
5b- reductase + 3α - hydroxysteroid dehydrogenase activity
[αCortolone+bCortolone + THE]/E	∑ (Cortolone-G_1, Cortolone-G_2, THE-G) / ∑ (E-S, E-G)
∆4 17, 20 lyase activity (CYP17A1)
DHEA/17-Hydroxpregnenolone	∑ (DHEA-S, 16OHDHEA-diS_1, 16OHDHEA-diS_2, 16OH-DHEAS_1, 16OH-DHEAS_2) / (5PD-20one-S)
3b-hydroxysteroid dehydrogenase (3bHSD) activity
17-Hydroxyprogesterone/17-hydroxypregnenolone	∑ (PT-diS, PT-G) / 5PD-20one-S
P450 aromatase activity
Estradiol/ Testosterone	(E2-S) / ∑ (T-G, T-S)
17b-hydroxysteroid dehydrogenase (17bHSD) activity
Estradiol/ Estrone	(E2-S) / ∑ (E1-G, E1-S)
16α - hydroxylase activity
Estriol/Estradiol	∑ (E3-G, E3-SG, E3-S, E4-SG) / (E2-S)
Global enzymatic activity	Formula
17a-hydroxylase	∑ (5PD-20one-S, 17-hydroxy-progesterone production) / ∑ (pregnenolone_production, progesterone_production)
17,20 lyase	DHEA_production /5PD-20one-S
CYP17 global (17α-hydroxylase and 17,20-lyase)	∑ (AN-S, Andros-G, Etio-S, Etio-G) / Progesterone production
21-hydroxylase	Corticosteroid_production / Progesterone_production
3b-HSD	∑ (Progesterone_production, 17-hydroxy-progesterone production, testosterone_production) / ∑ (Pregnenolone_production, 5PD-20one-S, DHEA_production)
Aromatase	Estradiol_production / testosterone_production
Androgens/Progestogens	Androgen_production / Progestogen_production
Sulfate/Glucuronide ratios	Formula
SG ratio Androgens	∑ (16OH-DHEAS_1, 16OH-DHEAS_2, AN-S, DHEA-S, epiAN-S, Etio-S, T-S) / ∑ (Andros-G, Etio-G, T-G)
SG ratio Testosterone	∑ (AN-S, Etio-S, T-S) / ∑ (Andros-G, Etio-G, T-G)
SG ratio Corticosteroids	∑ (A-S, B-S, E-S, F-S) / ∑ (20aDHF-G, 20bDHF-G, 20DHE-G, Cortolone-G_1, Cortolone-G_2, E-G, F-G, THE-G)
SG ratio Cortisol	∑ (E-S, F-S) / ∑ (20aDHF-G, 20bDHF-G, 20DHE-G, Cortolone-G_1, Cortolone-G_2, E-G, F-G, THE-G)
SG ratio Estrogens	∑ (E1-S, E2-S, E3-S) / ∑ (E1-G, E3-G)
SG ratio Estradiol	∑ (E1-S, E2-S) / ∑ (E1-G)
SG ratio Estriol	∑ (E3-S) / ∑ (E3-G)
SG ratio Progestogens	∑ (5PD-20one-S, PD-S_1, PD-S_2) / ∑ (5PD-G, PD-G, PT-G)
SG ratio Progesterone	∑ (PD-S_1, PD-S_2) / ∑ (PD-G)

## Sheet: ST4-A
ST4-A: INMA-Sabadell - Linear mixed-effects models for prenatal steroid hormone exposure-neurodevelopment associations (Primary Analysis, Full population)
predictor	estimate	std.error	df	t.value	p.value	outcome	sample_size	n_timepoints	low_CI	high_CI	variable_group	variable_plot_name	hormone_full_name	hormone	hormone_group	sum_hormone_group	model_nb	outcome_full_name
cc.16OH_DHEAS_1_m_32w_i_SG_GA_adj	3.27029	2.21878	1416	1.47392	0.140726	hitrtse	436	1430	-1.06	7.60058	hormone metabolite	16OH-DHEAS_1	DHEA: 16OH-DHEAS_1	DHEA	Androgen		model_5	Hit reaction time SE
cc.16OH_DHEAS_1_m_32w_i_SG_GA_adj	0.660906	0.36989	475.781	1.78676	0.0746125	motor	500	914	-0.0554255	1.37768	hormone metabolite	16OH-DHEAS_1	DHEA: 16OH-DHEAS_1	DHEA	Androgen		model_5	Early motor skills
cc.16OH_DHEAS_1_m_32w_i_SG_GA_adj	-0.0411345	0.378591	479.033	-0.108651	0.913524	mental	500	914	-0.77502	0.691961	hormone metabolite	16OH-DHEAS_1	DHEA: 16OH-DHEAS_1	DHEA	Androgen		model_5	Early mental skills
cc.16OH_DHEAS_1_m_32w_i_SG_GA_adj	-0.517679	0.702169	374.403	-0.737257	0.461428	percentile_correct_raven	390	655	-1.87447	0.837979	hormone metabolite	16OH-DHEAS_1	DHEA: 16OH-DHEAS_1	DHEA	Androgen		model_5	Fluid intelligence
cc.16OH_DHEAS_1_m_32w_i_SG_GA_adj	0.0273015	0.0290002	415.727	0.941426	0.347033	ADHD_scaled	429	1170	-0.0287623	0.0834307	hormone metabolite	16OH-DHEAS_1	DHEA: 16OH-DHEAS_1	DHEA	Androgen		model_5	ADHD
cc.16OH_DHEAS_1_m_32w_i_SG_GA_adj	0.0407435	0.0324765	377.437	1.25455	0.210417	Gen_Tot_scaled	393	669	-0.0219392	0.103531	hormone metabolite	16OH-DHEAS_1	DHEA: 16OH-DHEAS_1	DHEA	Androgen		model_5	Total scale
cc.16OH_DHEAS_1_m_32w_i_SG_GA_adj	0.0251822	0.032104	377.556	0.784393	0.433301	Gen_Ext_scaled	393	669	-0.0367865	0.0872412	hormone metabolite	16OH-DHEAS_1	DHEA: 16OH-DHEAS_1	DHEA	Androgen		model_5	Externalizing scale
cc.16OH_DHEAS_1_m_32w_i_SG_GA_adj	0.0171391	0.0324486	379.931	0.528194	0.597673	Gen_Int_scaled	393	669	-0.0454929	0.0798772	hormone metabolite	16OH-DHEAS_1	DHEA: 16OH-DHEAS_1	DHEA	Androgen		model_5	Internalizing scale
cc.16OH_DHEAS_2_m_32w_i_SG_GA_adj	-1.67027	1.8185	1416	-0.918489	0.358519	hitrtse	436	1430	-5.21936	1.87881	hormone metabolite	16OH-DHEAS_2	DHEA: 16OH-DHEAS_2	DHEA	Androgen		model_5	Hit reaction time SE
cc.16OH_DHEAS_2_m_32w_i_SG_GA_adj	0.411551	0.311913	458.096	1.31944	0.18768	motor	500	914	-0.192341	1.01592	hormone metabolite	16OH-DHEAS_2	DHEA: 16OH-DHEAS_2	DHEA	Androgen		model_5	Early motor skills
cc.16OH_DHEAS_2_m_32w_i_SG_GA_adj	0.495048	0.318786	462.631	1.55292	0.121127	mental	500	914	-0.122325	1.11269	hormone metabolite	16OH-DHEAS_2	DHEA: 16OH-DHEAS_2	DHEA	Androgen		model_5	Early mental skills
cc.16OH_DHEAS_2_m_32w_i_SG_GA_adj	0.205229	0.572986	377.789	0.358175	0.720413	percentile_correct_raven	390	655	-0.900838	1.31273	hormone metabolite	16OH-DHEAS_2	DHEA: 16OH-DHEAS_2	DHEA	Androgen		model_5	Fluid intelligence
cc.16OH_DHEAS_2_m_32w_i_SG_GA_adj	0.00542557	0.0238856	415.874	0.227148	0.82042	ADHD_scaled	429	1170	-0.0407735	0.0516323	hormone metabolite	16OH-DHEAS_2	DHEA: 16OH-DHEAS_2	DHEA	Androgen		model_5	ADHD
cc.16OH_DHEAS_2_m_32w_i_SG_GA_adj	0.0175188	0.0263379	378.97	0.665155	0.506356	Gen_Tot_scaled	393	669	-0.0332746	0.0684966	hormone metabolite	16OH-DHEAS_2	DHEA: 16OH-DHEAS_2	DHEA	Androgen		model_5	Total scale
cc.16OH_DHEAS_2_m_32w_i_SG_GA_adj	0.0179629	0.0260075	379.281	0.690679	0.49019	Gen_Ext_scaled	393	669	-0.0321942	0.068297	hormone metabolite	16OH-DHEAS_2	DHEA: 16OH-DHEAS_2	DHEA	Androgen		model_5	Externalizing scale
cc.16OH_DHEAS_2_m_32w_i_SG_GA_adj	0.0136236	0.0262837	381.718	0.51833	0.604528	Gen_Int_scaled	393	669	-0.0370663	0.0645025	hormone metabolite	16OH-DHEAS_2	DHEA: 16OH-DHEAS_2	DHEA	Androgen		model_5	Internalizing scale
cc.16OHDHEA_diS_1_m_32w_i_SG_GA_adj	-0.110621	2.91184	1416	-0.0379903	0.969701	hitrtse	436	1430	-5.79353	5.57228	hormone metabolite	16OHDHEA-diS_1	DHEA: 16OHDHEA-diS_1	DHEA	Androgen		model_5	Hit reaction time SE
cc.16OHDHEA_diS_1_m_32w_i_SG_GA_adj	0.727805	0.494018	482.026	1.47324	0.14134	motor	500	914	-0.230993	1.68346	hormone metabolite	16OHDHEA-diS_1	DHEA: 16OHDHEA-diS_1	DHEA	Androgen		model_5	Early motor skills
cc.16OHDHEA_diS_1_m_32w_i_SG_GA_adj	1.24063	0.501706	485.228	2.47283	0.0137462	mental	500	914	0.26666	2.21116	hormone metabolite	16OHDHEA-diS_1	DHEA: 16OHDHEA-diS_1	DHEA	Androgen		model_5	Early mental skills
cc.16OHDHEA_diS_1_m_32w_i_SG_GA_adj	0.783605	0.906435	378.183	0.864491	0.387866	percentile_correct_raven	390	655	-0.96772	2.534	hormone metabolite	16OHDHEA-diS_1	DHEA: 16OHDHEA-diS_1	DHEA	Androgen		model_5	Fluid intelligence
cc.16OHDHEA_diS_1_m_32w_i_SG_GA_adj	0.0136708	0.0380734	413.85	0.359065	0.719729	ADHD_scaled	429	1170	-0.0600059	0.0872847	hormone metabolite	16OHDHEA-diS_1	DHEA: 16OHDHEA-diS_1	DHEA	Androgen		model_5	ADHD
cc.16OHDHEA_diS_1_m_32w_i_SG_GA_adj	0.0414705	0.0418138	375.889	0.99179	0.321938	Gen_Tot_scaled	393	669	-0.0391732	0.122386	hormone metabolite	16OHDHEA-diS_1	DHEA: 16OHDHEA-diS_1	DHEA	Androgen		model_5	Total scale
cc.16OHDHEA_diS_1_m_32w_i_SG_GA_adj	0.0548813	0.0412136	375.312	1.33163	0.18379	Gen_Ext_scaled	393	669	-0.0245845	0.134656	hormone metabolite	16OHDHEA-diS_1	DHEA: 16OHDHEA-diS_1	DHEA	Androgen		model_5	Externalizing scale
cc.16OHDHEA_diS_1_m_32w_i_SG_GA_adj	0.0325984	0.0417158	378.192	0.781441	0.435032	Gen_Int_scaled	393	669	-0.047891	0.113287	hormone metabolite	16OHDHEA-diS_1	DHEA: 16OHDHEA-diS_1	DHEA	Androgen		model_5	Internalizing scale
cc.16OHDHEA_diS_2_m_32w_i_SG_GA_adj	-0.379577	2.64284	1416	-0.143625	0.885817	hitrtse	436	1430	-5.53749	4.77834	hormone metabolite	16OHDHEA-diS_2	DHEA: 16OHDHEA-diS_2	DHEA	Androgen		model_5	Hit reaction time SE
cc.16OHDHEA_diS_2_m_32w_i_SG_GA_adj	0.640026	0.444768	476.784	1.43901	0.150803	motor	500	914	-0.221969	1.50128	hormone metabolite	16OHDHEA-diS_2	DHEA: 16OHDHEA-diS_2	DHEA	Androgen		model_5	Early motor skills
cc.16OHDHEA_diS_2_m_32w_i_SG_GA_adj	0.917107	0.452992	480.556	2.02455	0.0434658	mental	500	914	0.037749	1.79335	hormone metabolite	16OHDHEA-diS_2	DHEA: 16OHDHEA-diS_2	DHEA	Androgen		model_5	Early mental skills
cc.16OHDHEA_diS_2_m_32w_i_SG_GA_adj	1.10929	0.813606	378.711	1.36342	0.173559	percentile_correct_raven	390	655	-0.46388	2.67942	hormone metabolite	16OHDHEA-diS_2	DHEA: 16OHDHEA-diS_2	DHEA	Androgen		model_5	Fluid intelligence
cc.16OHDHEA_diS_2_m_32w_i_SG_GA_adj	0.00251356	0.0344329	411.799	0.0729989	0.941842	ADHD_scaled	429	1170	-0.064116	0.069087	hormone metabolite	16OHDHEA-diS_2	DHEA: 16OHDHEA-diS_2	DHEA	Androgen		model_5	ADHD
cc.16OHDHEA_diS_2_m_32w_i_SG_GA_adj	0.0505476	0.0375559	379.549	1.34593	0.179129	Gen_Tot_scaled	393	669	-0.0218608	0.123268	hormone metabolite	16OHDHEA-diS_2	DHEA: 16OHDHEA-diS_2	DHEA	Androgen		model_5	Total scale
cc.16OHDHEA_diS_2_m_32w_i_SG_GA_adj	0.0618676	0.0370421	379.878	1.6702	0.0957043	Gen_Ext_scaled	393	669	-0.00954736	0.133592	hormone metabolite	16OHDHEA-diS_2	DHEA: 16OHDHEA-diS_2	DHEA	Androgen		model_5	Externalizing scale
cc.16OHDHEA_diS_2_m_32w_i_SG_GA_adj	0.0376871	0.0375255	382.774	1.00431	0.315866	Gen_Int_scaled	393	669	-0.0346794	0.110335	hormone metabolite	16OHDHEA-diS_2	DHEA: 16OHDHEA-diS_2	DHEA	Androgen		model_5	Internalizing scale
cc.20aDHF_G_m_32w_i_SG_GA_adj	2.53907	3.15164	1416	0.805634	0.420589	hitrtse	436	1430	-3.61185	8.68998	hormone metabolite	20aDHF-G	Cortisol: 20aDHF-G	Cortisol	Corticosteroid		model_5	Hit reaction time SE
cc.20aDHF_G_m_32w_i_SG_GA_adj	-1.33786	0.52388	468.804	-2.55375	0.0109724	motor	500	914	-2.35366	-0.324006	hormone metabolite	20aDHF-G	Cortisol: 20aDHF-G	Cortisol	Corticosteroid		model_5	Early motor skills
cc.20aDHF_G_m_32w_i_SG_GA_adj	-2.04801	0.530305	472.059	-3.86195	0.000128178	mental	500	914	-3.07592	-1.02125	hormone metabolite	20aDHF-G	Cortisol: 20aDHF-G	Cortisol	Corticosteroid		model_5	Early mental skills
cc.20aDHF_G_m_32w_i_SG_GA_adj	-0.974717	0.986698	374.691	-0.987858	0.32386	percentile_correct_raven	390	655	-2.87748	0.934788	hormone metabolite	20aDHF-G	Cortisol: 20aDHF-G	Cortisol	Corticosteroid		model_5	Fluid intelligence
cc.20aDHF_G_m_32w_i_SG_GA_adj	0.00703962	0.0411779	416.901	0.170956	0.864341	ADHD_scaled	429	1170	-0.0725708	0.0867372	hormone metabolite	20aDHF-G	Cortisol: 20aDHF-G	Cortisol	Corticosteroid		model_5	ADHD
cc.20aDHF_G_m_32w_i_SG_GA_adj	-0.0127648	0.0455556	380.225	-0.280203	0.779474	Gen_Tot_scaled	393	669	-0.100757	0.0752459	hormone metabolite	20aDHF-G	Cortisol: 20aDHF-G	Cortisol	Corticosteroid		model_5	Total scale
cc.20aDHF_G_m_32w_i_SG_GA_adj	-0.0184323	0.0449903	380.784	-0.409696	0.68226	Gen_Ext_scaled	393	669	-0.105303	0.0685149	hormone metabolite	20aDHF-G	Cortisol: 20aDHF-G	Cortisol	Corticosteroid		model_5	Externalizing scale
cc.20aDHF_G_m_32w_i_SG_GA_adj	-0.0216342	0.0454441	382.981	-0.476061	0.634302	Gen_Int_scaled	393	669	-0.109497	0.0660908	hormone metabolite	20aDHF-G	Cortisol: 20aDHF-G	Cortisol	Corticosteroid		model_5	Internalizing scale
cc.20bDHF_G_m_32w_i_SG_GA_adj	-2.06449	2.45672	1416	-0.840344	0.400857	hitrtse	436	1430	-6.85916	2.73018	hormone metabolite	20bDHF-G	Cortisol: 20bDHF-G	Cortisol	Corticosteroid		model_5	Hit reaction time SE
cc.20bDHF_G_m_32w_i_SG_GA_adj	-0.108578	0.424568	470.529	-0.255736	0.798266	motor	500	914	-0.932586	0.712553	hormone metabolite	20bDHF-G	Cortisol: 20bDHF-G	Cortisol	Corticosteroid		model_5	Early motor skills
cc.20bDHF_G_m_32w_i_SG_GA_adj	0.125926	0.433446	474.248	0.290523	0.771543	mental	500	914	-0.713985	0.965446	hormone metabolite	20bDHF-G	Cortisol: 20bDHF-G	Cortisol	Corticosteroid		model_5	Early mental skills
cc.20bDHF_G_m_32w_i_SG_GA_adj	-0.66852	0.76115	375.528	-0.878303	0.380341	percentile_correct_raven	390	655	-2.13904	0.801284	hormone metabolite	20bDHF-G	Cortisol: 20bDHF-G	Cortisol	Corticosteroid		model_5	Fluid intelligence
cc.20bDHF_G_m_32w_i_SG_GA_adj	0.0310275	0.0324186	410.882	0.957089	0.339085	ADHD_scaled	429	1170	-0.0316611	0.0937474	hormone metabolite	20bDHF-G	Cortisol: 20bDHF-G	Cortisol	Corticosteroid		model_5	ADHD
cc.20bDHF_G_m_32w_i_SG_GA_adj	0.0268879	0.0353088	380.156	0.761506	0.446827	Gen_Tot_scaled	393	669	-0.0414206	0.0950089	hormone metabolite	20bDHF-G	Cortisol: 20bDHF-G	Cortisol	Corticosteroid		model_5	Total scale
cc.20bDHF_G_m_32w_i_SG_GA_adj	0.0265783	0.0348725	380.591	0.762156	0.446439	Gen_Ext_scaled	393	669	-0.0409071	0.09384	hormone metabolite	20bDHF-G	Cortisol: 20bDHF-G	Cortisol	Corticosteroid		model_5	Externalizing scale
cc.20bDHF_G_m_32w_i_SG_GA_adj	0.00859827	0.0352489	382.697	0.24393	0.807416	Gen_Int_scaled	393	669	-0.0596521	0.0765699	hormone metabolite	20bDHF-G	Cortisol: 20bDHF-G	Cortisol	Corticosteroid		model_5	Internalizing scale
cc.20DHE_G_m_32w_i_SG_GA_adj	2.78164	2.96592	1416	0.937867	0.348473	hitrtse	436	1430	-3.00682	8.5701	hormone metabolite	20DHE-G	Cortisol: 20DHE-G	Cortisol	Corticosteroid		model_5	Hit reaction time SE
cc.20DHE_G_m_32w_i_SG_GA_adj	-0.530075	0.498488	475.721	-1.06337	0.288156	motor	500	914	-1.4962	0.435167	hormone metabolite	20DHE-G	Cortisol: 20DHE-G	Cortisol	Corticosteroid		model_5	Early motor skills
cc.20DHE_G_m_32w_i_SG_GA_adj	-1.06916	0.506596	478.205	-2.11049	0.0353352	mental	500	914	-2.0514	-0.0884179	hormone metabolite	20DHE-G	Cortisol: 20DHE-G	Cortisol	Corticosteroid		model_5	Early mental skills
cc.20DHE_G_m_32w_i_SG_GA_adj	-1.41125	0.920597	379.584	-1.53297	0.126116	percentile_correct_raven	390	655	-3.18525	0.37299	hormone metabolite	20DHE-G	Cortisol: 20DHE-G	Cortisol	Corticosteroid		model_5	Fluid intelligence
cc.20DHE_G_m_32w_i_SG_GA_adj	0.0393214	0.0384787	412.811	1.0219	0.307427	ADHD_scaled	429	1170	-0.03506	0.113797	hormone metabolite	20DHE-G	Cortisol: 20DHE-G	Cortisol	Corticosteroid		model_5	ADHD
cc.20DHE_G_m_32w_i_SG_GA_adj	0.0236767	0.0422417	379.911	0.560507	0.575464	Gen_Tot_scaled	393	669	-0.0579976	0.105209	hormone metabolite	20DHE-G	Cortisol: 20DHE-G	Cortisol	Corticosteroid		model_5	Total scale
cc.20DHE_G_m_32w_i_SG_GA_adj	0.00298901	0.0417293	380.165	0.0716286	0.942935	Gen_Ext_scaled	393	669	-0.0776678	0.0835509	hormone metabolite	20DHE-G	Cortisol: 20DHE-G	Cortisol	Corticosteroid		model_5	Externalizing scale
cc.20DHE_G_m_32w_i_SG_GA_adj	0.007794	0.0421594	382.563	0.18487	0.853429	Gen_Int_scaled	393	669	-0.0737858	0.0891252	hormone metabolite	20DHE-G	Cortisol: 20DHE-G	Cortisol	Corticosteroid		model_5	Internalizing scale
cc.21OH_5P_diS_m_32w_i_SG_GA_adj	-3.05945	3.2739	1416	-0.934497	0.350207	hitrtse	436	1430	-9.44899	3.33009	hormone metabolite	21OH-5P-diS	Pregnenolone: 21OH-5P-diS	Pregnenolone	Progestogen		model_5	Hit reaction time SE
cc.21OH_5P_diS_m_32w_i_SG_GA_adj	0.519033	0.552484	479.64	0.939455	0.34797	motor	500	914	-0.553969	1.58726	hormone metabolite	21OH-5P-diS	Pregnenolone: 21OH-5P-diS	Pregnenolone	Progestogen		model_5	Early motor skills
cc.21OH_5P_diS_m_32w_i_SG_GA_adj	1.29369	0.561084	483.272	2.30569	0.0215502	mental	500	914	0.203965	2.37874	hormone metabolite	21OH-5P-diS	Pregnenolone: 21OH-5P-diS	Pregnenolone	Progestogen		model_5	Early mental skills
cc.21OH_5P_diS_m_32w_i_SG_GA_adj	0.825382	1.01853	383.747	0.810363	0.418234	percentile_correct_raven	390	655	-1.14314	2.79202	hormone metabolite	21OH-5P-diS	Pregnenolone: 21OH-5P-diS	Pregnenolone	Progestogen		model_5	Fluid intelligence
cc.21OH_5P_diS_m_32w_i_SG_GA_adj	0.0466236	0.0425653	411.641	1.09534	0.274007	ADHD_scaled	429	1170	-0.0357746	0.128891	hormone metabolite	21OH-5P-diS	Pregnenolone: 21OH-5P-diS	Pregnenolone	Progestogen		model_5	ADHD
cc.21OH_5P_diS_m_32w_i_SG_GA_adj	0.0296418	0.0466397	381.874	0.635548	0.525452	Gen_Tot_scaled	393	669	-0.0603745	0.11983	hormone metabolite	21OH-5P-diS	Pregnenolone: 21OH-5P-diS	Pregnenolone	Progestogen		model_5	Total scale
cc.21OH_5P_diS_m_32w_i_SG_GA_adj	0.0536232	0.0460149	382.641	1.16534	0.244605	Gen_Ext_scaled	393	669	-0.0351483	0.142649	hormone metabolite	21OH-5P-diS	Pregnenolone: 21OH-5P-diS	Pregnenolone	Progestogen		model_5	Externalizing scale
cc.21OH_5P_diS_m_32w_i_SG_GA_adj	0.0134834	0.0465848	385.542	0.289437	0.772402	Gen_Int_scaled	393	669	-0.0764863	0.103511	hormone metabolite	21OH-5P-diS	Pregnenolone: 21OH-5P-diS	Pregnenolone	Progestogen		model_5	Internalizing scale
cc.5AD_diS_1_m_32w_i_SG_GA_adj	-2.41845	2.42148	1416	-0.998749	0.318087	hitrtse	436	1430	-7.14436	2.30745	hormone metabolite	5AD-diS_1	DHEA: 5AD-diS_1	DHEA	Androgen		model_5	Hit reaction time SE
cc.5AD_diS_1_m_32w_i_SG_GA_adj	0.421764	0.407946	474.548	1.03387	0.301724	motor	500	914	-0.369959	1.21083	hormone metabolite	5AD-diS_1	DHEA: 5AD-diS_1	DHEA	Androgen		model_5	Early motor skills
cc.5AD_diS_1_m_32w_i_SG_GA_adj	0.92529	0.414813	478.523	2.23062	0.026169	mental	500	914	0.119799	1.72751	hormone metabolite	5AD-diS_1	DHEA: 5AD-diS_1	DHEA	Androgen		model_5	Early mental skills
cc.5AD_diS_1_m_32w_i_SG_GA_adj	0.791231	0.742424	372.124	1.06574	0.287232	percentile_correct_raven	390	655	-0.643318	2.22454	hormone metabolite	5AD-diS_1	DHEA: 5AD-diS_1	DHEA	Androgen		model_5	Fluid intelligence
cc.5AD_diS_1_m_32w_i_SG_GA_adj	-0.00149136	0.0315848	411.094	-0.0472177	0.962363	ADHD_scaled	429	1170	-0.0625882	0.0595952	hormone metabolite	5AD-diS_1	DHEA: 5AD-diS_1	DHEA	Androgen		model_5	ADHD
cc.5AD_diS_1_m_32w_i_SG_GA_adj	0.0679661	0.0341528	371.92	1.99006	0.047316	Gen_Tot_scaled	393	669	0.00205525	0.13399	hormone metabolite	5AD-diS_1	DHEA: 5AD-diS_1	DHEA	Androgen		model_5	Total scale
cc.5AD_diS_1_m_32w_i_SG_GA_adj	0.0884026	0.0335349	370.325	2.63614	0.00873817	Gen_Ext_scaled	393	669	0.0236998	0.153242	hormone metabolite	5AD-diS_1	DHEA: 5AD-diS_1	DHEA	Androgen		model_5	Externalizing scale
cc.5AD_diS_1_m_32w_i_SG_GA_adj	0.0550093	0.0340913	373.503	1.61359	0.107461	Gen_Int_scaled	393	669	-0.0108199	0.120879	hormone metabolite	5AD-diS_1	DHEA: 5AD-diS_1	DHEA	Androgen		model_5	Internalizing scale
cc.5AD_diS_2_m_32w_i_SG_GA_adj	-4.23755	2.9503	1416	-1.43631	0.151135	hitrtse	436	1430	-9.99553	1.52042	hormone metabolite	5AD-diS_2	DHEA: 5AD-diS_2	DHEA	Androgen		model_5	Hit reaction time SE
cc.5AD_diS_2_m_32w_i_SG_GA_adj	0.54624	0.511253	470.489	1.06843	0.285873	motor	500	914	-0.445542	1.53536	hormone metabolite	5AD-diS_2	DHEA: 5AD-diS_2	DHEA	Androgen		model_5	Early motor skills
cc.5AD_diS_2_m_32w_i_SG_GA_adj	1.43414	0.51894	475.209	2.76359	0.00593884	mental	500	914	0.426404	2.43765	hormone metabolite	5AD-diS_2	DHEA: 5AD-diS_2	DHEA	Androgen		model_5	Early mental skills
cc.5AD_diS_2_m_32w_i_SG_GA_adj	1.41117	0.916497	375.611	1.53974	0.124465	percentile_correct_raven	390	655	-0.359054	3.18137	hormone metabolite	5AD-diS_2	DHEA: 5AD-diS_2	DHEA	Androgen		model_5	Fluid intelligence
cc.5AD_diS_2_m_32w_i_SG_GA_adj	-0.000128892	0.0390565	408.235	-0.00330014	0.997368	ADHD_scaled	429	1170	-0.0756865	0.0753945	hormone metabolite	5AD-diS_2	DHEA: 5AD-diS_2	DHEA	Androgen		model_5	ADHD
cc.5AD_diS_2_m_32w_i_SG_GA_adj	0.0469413	0.0423113	373.55	1.10943	0.26796	Gen_Tot_scaled	393	669	-0.0347495	0.128703	hormone metabolite	5AD-diS_2	DHEA: 5AD-diS_2	DHEA	Androgen		model_5	Total scale
cc.5AD_diS_2_m_32w_i_SG_GA_adj	0.0742895	0.0416176	372.401	1.78505	0.0750671	Gen_Ext_scaled	393	669	-0.00604564	0.15472	hormone metabolite	5AD-diS_2	DHEA: 5AD-diS_2	DHEA	Androgen		model_5	Externalizing scale
cc.5AD_diS_2_m_32w_i_SG_GA_adj	0.026162	0.0422116	375.159	0.619784	0.535776	Gen_Int_scaled	393	669	-0.0553972	0.107676	hormone metabolite	5AD-diS_2	DHEA: 5AD-diS_2	DHEA	Androgen		model_5	Internalizing scale
cc.5PD_20one_S_m_32w_i_SG_GA_adj	-2.49732	2.10751	1416	-1.18496	0.236231	hitrtse	436	1430	-6.61045	1.61581	hormone metabolite	5PD-20one-S	17-hydroxy-pregnenolone: 5PD-20one-S	17-hydroxy-pregnenolone	Progestogen		model_5	Hit reaction time SE
cc.5PD_20one_S_m_32w_i_SG_GA_adj	0.37646	0.355131	469.887	1.06006	0.289662	motor	500	914	-0.312304	1.06364	hormone metabolite	5PD-20one-S	17-hydroxy-pregnenolone: 5PD-20one-S	17-hydroxy-pregnenolone	Progestogen		model_5	Early motor skills
cc.5PD_20one_S_m_32w_i_SG_GA_adj	0.236441	0.362816	473.468	0.651684	0.514921	mental	500	914	-0.467396	0.93849	hormone metabolite	5PD-20one-S	17-hydroxy-pregnenolone: 5PD-20one-S	17-hydroxy-pregnenolone	Progestogen		model_5	Early mental skills
cc.5PD_20one_S_m_32w_i_SG_GA_adj	0.567431	0.654452	378.89	0.867033	0.386473	percentile_correct_raven	390	655	-0.693975	1.83514	hormone metabolite	5PD-20one-S	17-hydroxy-pregnenolone: 5PD-20one-S	17-hydroxy-pregnenolone	Progestogen		model_5	Fluid intelligence
cc.5PD_20one_S_m_32w_i_SG_GA_adj	0.0228855	0.027454	415.704	0.833597	0.404987	ADHD_scaled	429	1170	-0.0302191	0.0759912	hormone metabolite	5PD-20one-S	17-hydroxy-pregnenolone: 5PD-20one-S	17-hydroxy-pregnenolone	Progestogen		model_5	ADHD
cc.5PD_20one_S_m_32w_i_SG_GA_adj	0.0318491	0.0302151	378.755	1.05408	0.292519	Gen_Tot_scaled	393	669	-0.0264651	0.0902724	hormone metabolite	5PD-20one-S	17-hydroxy-pregnenolone: 5PD-20one-S	17-hydroxy-pregnenolone	Progestogen		model_5	Total scale
cc.5PD_20one_S_m_32w_i_SG_GA_adj	0.0258776	0.0298529	379.151	0.866837	0.38658	Gen_Ext_scaled	393	669	-0.0317537	0.0835791	hormone metabolite	5PD-20one-S	17-hydroxy-pregnenolone: 5PD-20one-S	17-hydroxy-pregnenolone	Progestogen		model_5	Externalizing scale
cc.5PD_20one_S_m_32w_i_SG_GA_adj	0.0350762	0.0301295	381.215	1.16418	0.245078	Gen_Int_scaled	393	669	-0.0230602	0.0933564	hormone metabolite	5PD-20one-S	17-hydroxy-pregnenolone: 5PD-20one-S	17-hydroxy-pregnenolone	Progestogen		model_5	Internalizing scale
cc.5PD_diS_m_32w_i_SG_GA_adj	-3.77434	3.08237	1416	-1.2245	0.220969	hitrtse	436	1430	-9.79007	2.24138	hormone metabolite	5PD-diS	Pregnenolone: 5PD-diS	Pregnenolone	Progestogen		model_5	Hit reaction time SE
cc.5PD_diS_m_32w_i_SG_GA_adj	1.12409	0.520427	481.242	2.15995	0.03127	motor	500	914	0.114603	2.13123	hormone metabolite	5PD-diS	Pregnenolone: 5PD-diS	Pregnenolone	Progestogen		model_5	Early motor skills
cc.5PD_diS_m_32w_i_SG_GA_adj	1.28253	0.530102	484.564	2.41941	0.0159129	mental	500	914	0.253297	2.30789	hormone metabolite	5PD-diS	Pregnenolone: 5PD-diS	Pregnenolone	Progestogen		model_5	Early mental skills
cc.5PD_diS_m_32w_i_SG_GA_adj	1.31739	0.959434	382.3	1.37309	0.170529	percentile_correct_raven	390	655	-0.534999	3.17172	hormone metabolite	5PD-diS	Pregnenolone: 5PD-diS	Pregnenolone	Progestogen		model_5	Fluid intelligence
cc.5PD_diS_m_32w_i_SG_GA_adj	0.0288816	0.0402362	412.89	0.717801	0.473286	ADHD_scaled	429	1170	-0.0490311	0.10663	hormone metabolite	5PD-diS	Pregnenolone: 5PD-diS	Pregnenolone	Progestogen		model_5	ADHD
cc.5PD_diS_m_32w_i_SG_GA_adj	0.0514676	0.0440845	382.771	1.16748	0.243745	Gen_Tot_scaled	393	669	-0.0336621	0.136665	hormone metabolite	5PD-diS	Pregnenolone: 5PD-diS	Pregnenolone	Progestogen		model_5	Total scale
cc.5PD_diS_m_32w_i_SG_GA_adj	0.103865	0.0433002	383.542	2.39873	0.0169287	Gen_Ext_scaled	393	669	0.0203035	0.187604	hormone metabolite	5PD-diS	Pregnenolone: 5PD-diS	Pregnenolone	Progestogen		model_5	Externalizing scale
cc.5PD_diS_m_32w_i_SG_GA_adj	0.0160902	0.0440941	386.684	0.364907	0.71538	Gen_Int_scaled	393	669	-0.0691275	0.101249	hormone metabolite	5PD-diS	Pregnenolone: 5PD-diS	Pregnenolone	Progestogen		model_5	Internalizing scale
cc.5PD_G_m_32w_i_SG_GA_adj	-3.00679	3.41892	1416	-0.879456	0.379303	hitrtse	436	1430	-9.67934	3.66577	hormone metabolite	5PD-G	Pregnenolone: 5PD-G	Pregnenolone	Progestogen		model_5	Hit reaction time SE
cc.5PD_G_m_32w_i_SG_GA_adj	0.284174	0.546064	525.791	0.520404	0.603001	motor	500	914	-0.77625	1.34083	hormone metabolite	5PD-G	Pregnenolone: 5PD-G	Pregnenolone	Progestogen		model_5	Early motor skills
cc.5PD_G_m_32w_i_SG_GA_adj	-0.212694	0.553041	522.878	-0.38459	0.700698	mental	500	914	-1.28667	0.857512	hormone metabolite	5PD-G	Pregnenolone: 5PD-G	Pregnenolone	Progestogen		model_5	Early mental skills
cc.5PD_G_m_32w_i_SG_GA_adj	-0.309891	1.0174	367.445	-0.304591	0.76085	percentile_correct_raven	390	655	-2.27039	1.66087	hormone metabolite	5PD-G	Pregnenolone: 5PD-G	Pregnenolone	Progestogen		model_5	Fluid intelligence
cc.5PD_G_m_32w_i_SG_GA_adj	0.0575196	0.0438712	418.33	1.3111	0.190543	ADHD_scaled	429	1170	-0.0273181	0.142412	hormone metabolite	5PD-G	Pregnenolone: 5PD-G	Pregnenolone	Progestogen		model_5	ADHD
cc.5PD_G_m_32w_i_SG_GA_adj	0.0154758	0.0474788	383.194	0.325952	0.744639	Gen_Tot_scaled	393	669	-0.0762322	0.10721	hormone metabolite	5PD-G	Pregnenolone: 5PD-G	Pregnenolone	Progestogen		model_5	Total scale
cc.5PD_G_m_32w_i_SG_GA_adj	-0.00144016	0.0469303	384.426	-0.0306872	0.975535	Gen_Ext_scaled	393	669	-0.0920635	0.0892591	hormone metabolite	5PD-G	Pregnenolone: 5PD-G	Pregnenolone	Progestogen		model_5	Externalizing scale
cc.5PD_G_m_32w_i_SG_GA_adj	0.0184369	0.0474063	386.832	0.388913	0.697555	Gen_Int_scaled	393	669	-0.073142	0.110032	hormone metabolite	5PD-G	Pregnenolone: 5PD-G	Pregnenolone	Progestogen		model_5	Internalizing scale
cc.5PD_SG_m_32w_i_SG_GA_adj	-5.07084	2.78205	1416	-1.8227	0.0685597	hitrtse	436	1430	-10.5004	0.358766	hormone metabolite	5PD-SG	Pregnenolone: 5PD-SG	Pregnenolone	Progestogen		model_5	Hit reaction time SE
cc.5PD_SG_m_32w_i_SG_GA_adj	-0.132526	0.484058	464.594	-0.273782	0.784374	motor	500	914	-1.06984	0.805393	hormone metabolite	5PD-SG	Pregnenolone: 5PD-SG	Pregnenolone	Progestogen		model_5	Early motor skills
cc.5PD_SG_m_32w_i_SG_GA_adj	0.0992854	0.494609	468.522	0.200735	0.840993	mental	500	914	-0.85935	1.05697	hormone metabolite	5PD-SG	Pregnenolone: 5PD-SG	Pregnenolone	Progestogen		model_5	Early mental skills
cc.5PD_SG_m_32w_i_SG_GA_adj	1.01407	0.867866	382.004	1.16847	0.243348	percentile_correct_raven	390	655	-0.66129	2.69168	hormone metabolite	5PD-SG	Pregnenolone: 5PD-SG	Pregnenolone	Progestogen		model_5	Fluid intelligence
cc.5PD_SG_m_32w_i_SG_GA_adj	0.00391163	0.0370353	406.913	0.105619	0.915937	ADHD_scaled	429	1170	-0.0677156	0.0755441	hormone metabolite	5PD-SG	Pregnenolone: 5PD-SG	Pregnenolone	Progestogen		model_5	ADHD
cc.5PD_SG_m_32w_i_SG_GA_adj	0.0448776	0.0400614	380.904	1.12022	0.263325	Gen_Tot_scaled	393	669	-0.0324683	0.122312	hormone metabolite	5PD-SG	Pregnenolone: 5PD-SG	Pregnenolone	Progestogen		model_5	Total scale
cc.5PD_SG_m_32w_i_SG_GA_adj	0.081389	0.0393929	380.694	2.06609	0.0394964	Gen_Ext_scaled	393	669	0.0054176	0.15763	hormone metabolite	5PD-SG	Pregnenolone: 5PD-SG	Pregnenolone	Progestogen		model_5	Externalizing scale
cc.5PD_SG_m_32w_i_SG_GA_adj	0.0214815	0.0400419	384.285	0.536476	0.59194	Gen_Int_scaled	393	669	-0.0559026	0.0988114	hormone metabolite	5PD-SG	Pregnenolone: 5PD-SG	Pregnenolone	Progestogen		model_5	Internalizing scale
cc.A_S_m_32w_i_SG_GA_adj	4.57111	2.87121	1416	1.59205	0.111597	hitrtse	436	1430	-1.03251	10.1747	hormone metabolite	A-S	Corticosterone: A-S	Corticosterone	Corticosteroid		model_5	Hit reaction time SE
cc.A_S_m_32w_i_SG_GA_adj	0.202339	0.48751	471.269	0.415045	0.678298	motor	500	914	-0.744239	1.14496	hormone metabolite	A-S	Corticosterone: A-S	Corticosterone	Corticosteroid		model_5	Early motor skills
cc.A_S_m_32w_i_SG_GA_adj	0.0804698	0.497647	474.538	0.1617	0.871611	mental	500	914	-0.88635	1.04251	hormone metabolite	A-S	Corticosterone: A-S	Corticosterone	Corticosteroid		model_5	Early mental skills
cc.A_S_m_32w_i_SG_GA_adj	-0.412081	0.90105	386.992	-0.457334	0.647688	percentile_correct_raven	390	655	-2.15427	1.32723	hormone metabolite	A-S	Corticosterone: A-S	Corticosterone	Corticosteroid		model_5	Fluid intelligence
cc.A_S_m_32w_i_SG_GA_adj	0.0286589	0.037259	414.407	0.76918	0.442225	ADHD_scaled	429	1170	-0.04343	0.100711	hormone metabolite	A-S	Corticosterone: A-S	Corticosterone	Corticosteroid		model_5	ADHD
cc.A_S_m_32w_i_SG_GA_adj	0.0414239	0.0414857	385.985	0.998512	0.318657	Gen_Tot_scaled	393	669	-0.0386758	0.12162	hormone metabolite	A-S	Corticosterone: A-S	Corticosterone	Corticosteroid		model_5	Total scale
cc.A_S_m_32w_i_SG_GA_adj	0.059171	0.0409537	387.422	1.44483	0.149315	Gen_Ext_scaled	393	669	-0.0198369	0.138417	hormone metabolite	A-S	Corticosterone: A-S	Corticosterone	Corticosteroid		model_5	Externalizing scale
cc.A_S_m_32w_i_SG_GA_adj	0.0161267	0.0415045	390.528	0.388553	0.697818	Gen_Int_scaled	393	669	-0.0640807	0.096299	hormone metabolite	A-S	Corticosterone: A-S	Corticosterone	Corticosteroid		model_5	Internalizing scale
cc.AN_S_m_32w_i_SG_GA_adj	-1.18549	2.11671	1416	-0.560062	0.575526	hitrtse	436	1430	-5.31658	2.9456	hormone metabolite	AN-S	Testosterone: AN-S	Testosterone	Androgen		model_5	Hit reaction time SE
cc.AN_S_m_32w_i_SG_GA_adj	0.722229	0.364157	470.57	1.98329	0.047916	motor	500	914	0.0152166	1.42638	hormone metabolite	AN-S	Testosterone: AN-S	Testosterone	Androgen		model_5	Early motor skills
cc.AN_S_m_32w_i_SG_GA_adj	0.678578	0.371884	473.845	1.8247	0.0686752	mental	500	914	-0.0428284	1.3982	hormone metabolite	AN-S	Testosterone: AN-S	Testosterone	Androgen		model_5	Early mental skills
cc.AN_S_m_32w_i_SG_GA_adj	0.911196	0.646771	368.33	1.40884	0.159727	percentile_correct_raven	390	655	-0.336743	2.16156	hormone metabolite	AN-S	Testosterone: AN-S	Testosterone	Androgen		model_5	Fluid intelligence
cc.AN_S_m_32w_i_SG_GA_adj	-0.0145369	0.0278094	407.363	-0.522733	0.601444	ADHD_scaled	429	1170	-0.0683274	0.0392455	hormone metabolite	AN-S	Testosterone: AN-S	Testosterone	Androgen		model_5	ADHD
cc.AN_S_m_32w_i_SG_GA_adj	-0.00324784	0.0298506	368.656	-0.108803	0.913418	Gen_Tot_scaled	393	669	-0.0609026	0.0544037	hormone metabolite	AN-S	Testosterone: AN-S	Testosterone	Androgen		model_5	Total scale
cc.AN_S_m_32w_i_SG_GA_adj	0.0179852	0.0293966	366.717	0.611811	0.541042	Gen_Ext_scaled	393	669	-0.0388025	0.0747436	hormone metabolite	AN-S	Testosterone: AN-S	Testosterone	Androgen		model_5	Externalizing scale
cc.AN_S_m_32w_i_SG_GA_adj	-0.0116328	0.0296996	368.827	-0.391684	0.695518	Gen_Int_scaled	393	669	-0.0690179	0.0457076	hormone metabolite	AN-S	Testosterone: AN-S	Testosterone	Androgen		model_5	Internalizing scale
cc.Andros_G_m_32w_i_SG_GA_adj	1.47922	3.41142	1416	0.433607	0.66464	hitrtse	436	1430	-5.17871	8.13714	hormone metabolite	Andros-G	Testosterone: Andros-G	Testosterone	Androgen		model_5	Hit reaction time SE
cc.Andros_G_m_32w_i_SG_GA_adj	0.3674	0.577489	465.375	0.636202	0.524957	motor	500	914	-0.752972	1.48449	hormone metabolite	Andros-G	Testosterone: Andros-G	Testosterone	Androgen		model_5	Early motor skills
cc.Andros_G_m_32w_i_SG_GA_adj	0.830081	0.589309	469.947	1.40857	0.159625	mental	500	914	-0.314337	1.96954	hormone metabolite	Andros-G	Testosterone: Andros-G	Testosterone	Androgen		model_5	Early mental skills
cc.Andros_G_m_32w_i_SG_GA_adj	-1.19241	1.0427	362.881	-1.14358	0.253552	percentile_correct_raven	390	655	-3.20475	0.822508	hormone metabolite	Andros-G	Testosterone: Andros-G	Testosterone	Androgen		model_5	Fluid intelligence
cc.Andros_G_m_32w_i_SG_GA_adj	0.032448	0.0440625	416.079	0.736408	0.461898	ADHD_scaled	429	1170	-0.052773	0.117691	hormone metabolite	Andros-G	Testosterone: Andros-G	Testosterone	Androgen		model_5	ADHD
cc.Andros_G_m_32w_i_SG_GA_adj	-0.0394586	0.0483055	367.236	-0.816855	0.414541	Gen_Tot_scaled	393	669	-0.132823	0.0537703	hormone metabolite	Andros-G	Testosterone: Andros-G	Testosterone	Androgen		model_5	Total scale
cc.Andros_G_m_32w_i_SG_GA_adj	-0.0507193	0.0475516	365.089	-1.06662	0.28685	Gen_Ext_scaled	393	669	-0.142589	0.0410776	hormone metabolite	Andros-G	Testosterone: Andros-G	Testosterone	Androgen		model_5	Externalizing scale
cc.Andros_G_m_32w_i_SG_GA_adj	-0.0386291	0.0480577	367.177	-0.803808	0.422028	Gen_Int_scaled	393	669	-0.131545	0.0540988	hormone metabolite	Andros-G	Testosterone: Andros-G	Testosterone	Androgen		model_5	Internalizing scale
cc.B_S_m_32w_i_SG_GA_adj	4.68883	2.96628	1416	1.58071	0.114167	hitrtse	436	1430	-1.10033	10.478	hormone metabolite	B-S	Corticosterone: B-S	Corticosterone	Corticosteroid		model_5	Hit reaction time SE
cc.B_S_m_32w_i_SG_GA_adj	0.562811	0.504755	474.96	1.11502	0.265407	motor	500	914	-0.415562	1.54009	hormone metabolite	B-S	Corticosterone: B-S	Corticosterone	Corticosteroid		model_5	Early motor skills
cc.B_S_m_32w_i_SG_GA_adj	0.464349	0.515283	478.277	0.901152	0.367961	mental	500	914	-0.5357	1.4612	hormone metabolite	B-S	Corticosterone: B-S	Corticosterone	Corticosteroid		model_5	Early mental skills
cc.B_S_m_32w_i_SG_GA_adj	-0.218846	0.928738	380.965	-0.235638	0.81384	percentile_correct_raven	390	655	-2.01486	1.57338	hormone metabolite	B-S	Corticosterone: B-S	Corticosterone	Corticosteroid		model_5	Fluid intelligence
cc.B_S_m_32w_i_SG_GA_adj	0.00866704	0.038826	411.756	0.223228	0.823469	ADHD_scaled	429	1170	-0.066445	0.0837518	hormone metabolite	B-S	Corticosterone: B-S	Corticosterone	Corticosteroid		model_5	ADHD
cc.B_S_m_32w_i_SG_GA_adj	0.031564	0.0426456	378.005	0.740147	0.45967	Gen_Tot_scaled	393	669	-0.0507475	0.114013	hormone metabolite	B-S	Corticosterone: B-S	Corticosterone	Corticosteroid		model_5	Total scale
cc.B_S_m_32w_i_SG_GA_adj	0.0522184	0.0420294	377.496	1.24243	0.21485	Gen_Ext_scaled	393	669	-0.0288259	0.133571	hormone metabolite	B-S	Corticosterone: B-S	Corticosterone	Corticosteroid		model_5	Externalizing scale
cc.B_S_m_32w_i_SG_GA_adj	0.00376775	0.0425706	380.629	0.088506	0.929521	Gen_Int_scaled	393	669	-0.0784606	0.0860134	hormone metabolite	B-S	Corticosterone: B-S	Corticosterone	Corticosteroid		model_5	Internalizing scale
cc.Cortolone_G_1_m_32w_i_SG_GA_adj	-6.05561	3.70152	1416	-1.63598	0.102066	hitrtse	436	1430	-13.2797	1.16847	hormone metabolite	Cortolone-G_1	Cortisol: Cortolone-G_1	Cortisol	Corticosteroid		model_5	Hit reaction time SE
cc.Cortolone_G_1_m_32w_i_SG_GA_adj	0.171416	0.637367	467.907	0.268944	0.788091	motor	500	914	-1.0662	1.40367	hormone metabolite	Cortolone-G_1	Cortisol: Cortolone-G_1	Cortisol	Corticosteroid		model_5	Early motor skills
cc.Cortolone_G_1_m_32w_i_SG_GA_adj	0.535552	0.650465	471.729	0.823337	0.410732	mental	500	914	-0.725225	1.79504	hormone metabolite	Cortolone-G_1	Cortisol: Cortolone-G_1	Cortisol	Corticosteroid		model_5	Early mental skills
cc.Cortolone_G_1_m_32w_i_SG_GA_adj	-0.603027	1.13769	360.31	-0.530043	0.596408	percentile_correct_raven	390	655	-2.79736	1.59692	hormone metabolite	Cortolone-G_1	Cortisol: Cortolone-G_1	Cortisol	Corticosteroid		model_5	Fluid intelligence
cc.Cortolone_G_1_m_32w_i_SG_GA_adj	0.0151908	0.0484235	414.014	0.313707	0.753901	ADHD_scaled	429	1170	-0.0785019	0.108829	hormone metabolite	Cortolone-G_1	Cortisol: Cortolone-G_1	Cortisol	Corticosteroid		model_5	ADHD
cc.Cortolone_G_1_m_32w_i_SG_GA_adj	0.0484133	0.0526019	368.836	0.920371	0.35798	Gen_Tot_scaled	393	669	-0.0532535	0.149942	hormone metabolite	Cortolone-G_1	Cortisol: Cortolone-G_1	Cortisol	Corticosteroid		model_5	Total scale
cc.Cortolone_G_1_m_32w_i_SG_GA_adj	0.0180268	0.0518689	366.675	0.347545	0.728381	Gen_Ext_scaled	393	669	-0.0821663	0.11818	hormone metabolite	Cortolone-G_1	Cortisol: Cortolone-G_1	Cortisol	Corticosteroid		model_5	Externalizing scale
cc.Cortolone_G_1_m_32w_i_SG_GA_adj	0.059494	0.0523303	369.293	1.13689	0.25632	Gen_Int_scaled	393	669	-0.0417414	0.16043	hormone metabolite	Cortolone-G_1	Cortisol: Cortolone-G_1	Cortisol	Corticosteroid		model_5	Internalizing scale
cc.Cortolone_G_2_m_32w_i_SG_GA_adj	-6.07574	3.39535	1416	-1.78943	0.0737592	hitrtse	436	1430	-12.7023	0.550815	hormone metabolite	Cortolone-G_2	Cortisol: Cortolone-G_2	Cortisol	Corticosteroid		model_5	Hit reaction time SE
cc.Cortolone_G_2_m_32w_i_SG_GA_adj	0.340477	0.578065	473.781	0.588994	0.556146	motor	500	914	-0.780858	1.45896	hormone metabolite	Cortolone-G_2	Cortisol: Cortolone-G_2	Cortisol	Corticosteroid		model_5	Early motor skills
cc.Cortolone_G_2_m_32w_i_SG_GA_adj	0.725794	0.589149	477.155	1.23194	0.218579	mental	500	914	-0.416544	1.86632	hormone metabolite	Cortolone-G_2	Cortisol: Cortolone-G_2	Cortisol	Corticosteroid		model_5	Early mental skills
cc.Cortolone_G_2_m_32w_i_SG_GA_adj	-1.9443	1.03666	360.308	-1.87555	0.0615259	percentile_correct_raven	390	655	-3.9461	0.0575323	hormone metabolite	Cortolone-G_2	Cortisol: Cortolone-G_2	Cortisol	Corticosteroid		model_5	Fluid intelligence
cc.Cortolone_G_2_m_32w_i_SG_GA_adj	-0.0163584	0.0445931	413.918	-0.366836	0.713928	ADHD_scaled	429	1170	-0.102619	0.0698926	hormone metabolite	Cortolone-G_2	Cortisol: Cortolone-G_2	Cortisol	Corticosteroid		model_5	ADHD
cc.Cortolone_G_2_m_32w_i_SG_GA_adj	-0.0223521	0.0481975	366.352	-0.463761	0.643094	Gen_Tot_scaled	393	669	-0.115453	0.0707161	hormone metabolite	Cortolone-G_2	Cortisol: Cortolone-G_2	Cortisol	Corticosteroid		model_5	Total scale
cc.Cortolone_G_2_m_32w_i_SG_GA_adj	-0.0297656	0.047454	363.959	-0.627251	0.530888	Gen_Ext_scaled	393	669	-0.121382	0.0619038	hormone metabolite	Cortolone-G_2	Cortisol: Cortolone-G_2	Cortisol	Corticosteroid		model_5	Externalizing scale
cc.Cortolone_G_2_m_32w_i_SG_GA_adj	-0.0109025	0.0479476	365.992	-0.227384	0.820252	Gen_Int_scaled	393	669	-0.103612	0.0816057	hormone metabolite	Cortolone-G_2	Cortisol: Cortolone-G_2	Cortisol	Corticosteroid		model_5	Internalizing scale
cc.DHEA_S_m_32w_i_SG_GA_adj	0.0487349	1.26369	1416	0.0385656	0.969242	hitrtse	436	1430	-2.41755	2.51502	hormone metabolite	DHEA-S	DHEA: DHEA-S	DHEA	Androgen		model_5	Hit reaction time SE
cc.DHEA_S_m_32w_i_SG_GA_adj	0.24567	0.214006	466.842	1.14796	0.251575	motor	500	914	-0.169057	0.660025	hormone metabolite	DHEA-S	DHEA: DHEA-S	DHEA	Androgen		model_5	Early motor skills
cc.DHEA_S_m_32w_i_SG_GA_adj	0.200743	0.218676	470.61	0.917991	0.359094	mental	500	914	-0.222905	0.624345	hormone metabolite	DHEA-S	DHEA: DHEA-S	DHEA	Androgen		model_5	Early mental skills
cc.DHEA_S_m_32w_i_SG_GA_adj	0.263876	0.38531	363.582	0.684842	0.49388	percentile_correct_raven	390	655	-0.479069	1.00933	hormone metabolite	DHEA-S	DHEA: DHEA-S	DHEA	Androgen		model_5	Fluid intelligence
cc.DHEA_S_m_32w_i_SG_GA_adj	0.00937915	0.0163819	414.17	0.572532	0.567272	ADHD_scaled	429	1170	-0.0222882	0.0410872	hormone metabolite	DHEA-S	DHEA: DHEA-S	DHEA	Androgen		model_5	ADHD
cc.DHEA_S_m_32w_i_SG_GA_adj	0.0207995	0.017839	368.167	1.16596	0.244386	Gen_Tot_scaled	393	669	-0.0136341	0.0552744	hormone metabolite	DHEA-S	DHEA: DHEA-S	DHEA	Androgen		model_5	Total scale
cc.DHEA_S_m_32w_i_SG_GA_adj	0.0213599	0.0175758	366.395	1.2153	0.225033	Gen_Ext_scaled	393	669	-0.0125886	0.0552983	hormone metabolite	DHEA-S	DHEA: DHEA-S	DHEA	Androgen		model_5	Externalizing scale
cc.DHEA_S_m_32w_i_SG_GA_adj	0.0163079	0.0177644	368.347	0.918012	0.359213	Gen_Int_scaled	393	669	-0.0179775	0.0506449	hormone metabolite	DHEA-S	DHEA: DHEA-S	DHEA	Androgen		model_5	Internalizing scale
cc.E_G_m_32w_i_SG_GA_adj	5.73498	2.44688	1416	2.34379	0.0192265	hitrtse	436	1430	0.959509	10.5104	hormone metabolite	E-G	Cortisol: E-G	Cortisol	Corticosteroid		model_5	Hit reaction time SE
cc.E_G_m_32w_i_SG_GA_adj	-0.524841	0.416887	474.629	-1.25895	0.208666	motor	500	914	-1.33267	0.282507	hormone metabolite	E-G	Cortisol: E-G	Cortisol	Corticosteroid		model_5	Early motor skills
cc.E_G_m_32w_i_SG_GA_adj	-0.948388	0.423739	477.405	-2.23814	0.0256721	mental	500	914	-1.76969	-0.127814	hormone metabolite	E-G	Cortisol: E-G	Cortisol	Corticosteroid		model_5	Early mental skills
cc.E_G_m_32w_i_SG_GA_adj	-1.35631	0.766716	369.323	-1.76898	0.0777223	percentile_correct_raven	390	655	-2.83716	0.124361	hormone metabolite	E-G	Cortisol: E-G	Cortisol	Corticosteroid		model_5	Fluid intelligence
cc.E_G_m_32w_i_SG_GA_adj	0.022878	0.032212	414.686	0.710232	0.477959	ADHD_scaled	429	1170	-0.0394199	0.0851959	hormone metabolite	E-G	Cortisol: E-G	Cortisol	Corticosteroid		model_5	ADHD
cc.E_G_m_32w_i_SG_GA_adj	0.0204343	0.0355026	370.917	0.575573	0.565253	Gen_Tot_scaled	393	669	-0.0481526	0.0889913	hormone metabolite	E-G	Cortisol: E-G	Cortisol	Corticosteroid		model_5	Total scale
cc.E_G_m_32w_i_SG_GA_adj	0.0287255	0.0349723	369.133	0.821378	0.411961	Gen_Ext_scaled	393	669	-0.0387683	0.0963227	hormone metabolite	E-G	Cortisol: E-G	Cortisol	Corticosteroid		model_5	Externalizing scale
cc.E_G_m_32w_i_SG_GA_adj	-0.00923353	0.035357	371.411	-0.261152	0.79412	Gen_Int_scaled	393	669	-0.0776511	0.058954	hormone metabolite	E-G	Cortisol: E-G	Cortisol	Corticosteroid		model_5	Internalizing scale
cc.E_S_m_32w_i_SG_GA_adj	-0.110389	3.43876	1416	-0.0321013	0.974396	hitrtse	436	1430	-6.82167	6.60089	hormone metabolite	E-S	Cortisol: E-S	Cortisol	Corticosteroid		model_5	Hit reaction time SE
cc.E_S_m_32w_i_SG_GA_adj	0.00622838	0.58161	462.765	0.0107089	0.99146	motor	500	914	-1.11779	1.13618	hormone metabolite	E-S	Cortisol: E-S	Cortisol	Corticosteroid		model_5	Early motor skills
cc.E_S_m_32w_i_SG_GA_adj	0.334526	0.594224	467.072	0.562962	0.573731	mental	500	914	-0.81679	1.48542	hormone metabolite	E-S	Cortisol: E-S	Cortisol	Corticosteroid		model_5	Early mental skills
cc.E_S_m_32w_i_SG_GA_adj	-0.16599	1.07901	386.003	-0.153835	0.87782	percentile_correct_raven	390	655	-2.25204	1.91697	hormone metabolite	E-S	Cortisol: E-S	Cortisol	Corticosteroid		model_5	Fluid intelligence
cc.E_S_m_32w_i_SG_GA_adj	-0.0333525	0.0446938	415.23	-0.746243	0.455943	ADHD_scaled	429	1170	-0.119816	0.0530884	hormone metabolite	E-S	Cortisol: E-S	Cortisol	Corticosteroid		model_5	ADHD
cc.E_S_m_32w_i_SG_GA_adj	-0.0157336	0.0495233	383.489	-0.317702	0.750884	Gen_Tot_scaled	393	669	-0.111387	0.0799553	hormone metabolite	E-S	Cortisol: E-S	Cortisol	Corticosteroid		model_5	Total scale
cc.E_S_m_32w_i_SG_GA_adj	-0.0338362	0.0489209	384.746	-0.691652	0.489573	Gen_Ext_scaled	393	669	-0.128355	0.060658	hormone metabolite	E-S	Cortisol: E-S	Cortisol	Corticosteroid		model_5	Externalizing scale
cc.E_S_m_32w_i_SG_GA_adj	-0.0134808	0.0494554	387.224	-0.272586	0.785317	Gen_Int_scaled	393	669	-0.109001	0.082093	hormone metabolite	E-S	Cortisol: E-S	Cortisol	Corticosteroid		model_5	Internalizing scale
cc.E1_G_m_32w_i_SG_GA_adj	-2.69242	3.0808	1416	-0.873933	0.382303	hitrtse	436	1430	-8.70509	3.32026	hormone metabolite	E1-G	Estradiol: E1-G	Estradiol	Estrogen		model_5	Hit reaction time SE
cc.E1_G_m_32w_i_SG_GA_adj	0.98171	0.519729	488.078	1.88889	0.0594994	motor	500	914	-0.0266597	1.98744	hormone metabolite	E1-G	Estradiol: E1-G	Estradiol	Estrogen		model_5	Early motor skills
cc.E1_G_m_32w_i_SG_GA_adj	0.853737	0.529922	490.371	1.61106	0.10781	mental	500	914	-0.17567	1.87851	hormone metabolite	E1-G	Estradiol: E1-G	Estradiol	Estrogen		model_5	Early mental skills
cc.E1_G_m_32w_i_SG_GA_adj	0.574222	0.944159	378.709	0.608184	0.54343	percentile_correct_raven	390	655	-1.24953	2.39794	hormone metabolite	E1-G	Estradiol: E1-G	Estradiol	Estrogen		model_5	Fluid intelligence
cc.E1_G_m_32w_i_SG_GA_adj	-0.00780494	0.0399093	413.479	-0.195567	0.845045	ADHD_scaled	429	1170	-0.0849819	0.0694097	hormone metabolite	E1-G	Estradiol: E1-G	Estradiol	Estrogen		model_5	ADHD
cc.E1_G_m_32w_i_SG_GA_adj	-0.00204882	0.043442	373.39	-0.0471623	0.962409	Gen_Tot_scaled	393	669	-0.0859216	0.0818995	hormone metabolite	E1-G	Estradiol: E1-G	Estradiol	Estrogen		model_5	Total scale
cc.E1_G_m_32w_i_SG_GA_adj	0.0230535	0.0428238	372.271	0.538332	0.590669	Gen_Ext_scaled	393	669	-0.0596095	0.105817	hormone metabolite	E1-G	Estradiol: E1-G	Estradiol	Estrogen		model_5	Externalizing scale
cc.E1_G_m_32w_i_SG_GA_adj	-0.0091081	0.0432758	374.611	-0.210467	0.833418	Gen_Int_scaled	393	669	-0.0927506	0.0744351	hormone metabolite	E1-G	Estradiol: E1-G	Estradiol	Estrogen		model_5	Internalizing scale
cc.E1_S_m_32w_i_SG_GA_adj	-0.647084	1.39663	1416	-0.463319	0.643207	hitrtse	436	1430	-3.37282	2.07865	hormone metabolite	E1-S	Estradiol: E1-S	Estradiol	Estrogen		model_5	Hit reaction time SE
cc.E1_S_m_32w_i_SG_GA_adj	0.184599	0.235934	477.038	0.782416	0.434359	motor	500	914	-0.273466	0.640854	hormone metabolite	E1-S	Estradiol: E1-S	Estradiol	Estrogen		model_5	Early motor skills
cc.E1_S_m_32w_i_SG_GA_adj	0.176241	0.240605	479.845	0.732493	0.464226	mental	500	914	-0.290392	0.641958	hormone metabolite	E1-S	Estradiol: E1-S	Estradiol	Estrogen		model_5	Early mental skills
cc.E1_S_m_32w_i_SG_GA_adj	0.479864	0.428819	371.271	1.11903	0.263849	percentile_correct_raven	390	655	-0.346608	1.31032	hormone metabolite	E1-S	Estradiol: E1-S	Estradiol	Estrogen		model_5	Fluid intelligence
cc.E1_S_m_32w_i_SG_GA_adj	0.0167205	0.0182278	413.627	0.917311	0.359514	ADHD_scaled	429	1170	-0.0185316	0.0519836	hormone metabolite	E1-S	Estradiol: E1-S	Estradiol	Estrogen		model_5	ADHD
cc.E1_S_m_32w_i_SG_GA_adj	0.0239079	0.0198308	375.846	1.20559	0.228733	Gen_Tot_scaled	393	669	-0.0143727	0.0622396	hormone metabolite	E1-S	Estradiol: E1-S	Estradiol	Estrogen		model_5	Total scale
cc.E1_S_m_32w_i_SG_GA_adj	0.0307294	0.0195424	375.465	1.57245	0.11669	Gen_Ext_scaled	393	669	-0.00699509	0.0684998	hormone metabolite	E1-S	Estradiol: E1-S	Estradiol	Estrogen		model_5	Externalizing scale
cc.E1_S_m_32w_i_SG_GA_adj	0.0131604	0.0197993	378.07	0.66469	0.506654	Gen_Int_scaled	393	669	-0.0250776	0.0514153	hormone metabolite	E1-S	Estradiol: E1-S	Estradiol	Estrogen		model_5	Internalizing scale
cc.E2_S_m_32w_i_SG_GA_adj	0.016113	2.34907	1416	0.00685932	0.994528	hitrtse	436	1430	-4.56846	4.60069	hormone metabolite	E2-S	Estradiol: E2-S	Estradiol	Estrogen		model_5	Hit reaction time SE
cc.E2_S_m_32w_i_SG_GA_adj	0.313895	0.395371	468.321	0.793925	0.427641	motor	500	914	-0.451397	1.08036	hormone metabolite	E2-S	Estradiol: E2-S	Estradiol	Estrogen		model_5	Early motor skills
cc.E2_S_m_32w_i_SG_GA_adj	0.256274	0.403846	472.024	0.634582	0.526008	mental	500	914	-0.525569	1.03917	hormone metabolite	E2-S	Estradiol: E2-S	Estradiol	Estrogen		model_5	Early mental skills
cc.E2_S_m_32w_i_SG_GA_adj	-0.442512	0.721853	381.946	-0.613022	0.540227	percentile_correct_raven	390	655	-1.83522	0.953853	hormone metabolite	E2-S	Estradiol: E2-S	Estradiol	Estrogen		model_5	Fluid intelligence
cc.E2_S_m_32w_i_SG_GA_adj	9.51514e-06	0.0302179	412.222	0.000314884	0.999749	ADHD_scaled	429	1170	-0.0583961	0.0585035	hormone metabolite	E2-S	Estradiol: E2-S	Estradiol	Estrogen		model_5	ADHD
cc.E2_S_m_32w_i_SG_GA_adj	0.0169465	0.0331373	383.143	0.511402	0.609364	Gen_Tot_scaled	393	669	-0.047023	0.0810118	hormone metabolite	E2-S	Estradiol: E2-S	Estradiol	Estrogen		model_5	Total scale
cc.E2_S_m_32w_i_SG_GA_adj	0.015277	0.0327542	384.444	0.466413	0.641184	Gen_Ext_scaled	393	669	-0.0479891	0.0785611	hormone metabolite	E2-S	Estradiol: E2-S	Estradiol	Estrogen		model_5	Externalizing scale
cc.E2_S_m_32w_i_SG_GA_adj	0.000216003	0.0331032	386.87	0.00652515	0.994797	Gen_Int_scaled	393	669	-0.063704	0.0642062	hormone metabolite	E2-S	Estradiol: E2-S	Estradiol	Estrogen		model_5	Internalizing scale
cc.E3_G_m_32w_i_SG_GA_adj	1.90369	3.92407	1416	0.485133	0.627657	hitrtse	436	1430	-5.75474	9.56212	hormone metabolite	E3-G	Estriol: E3-G	Estriol	Estrogen		model_5	Hit reaction time SE
cc.E3_G_m_32w_i_SG_GA_adj	0.303717	0.661279	464.887	0.459287	0.646243	motor	500	914	-0.976997	1.58478	hormone metabolite	E3-G	Estriol: E3-G	Estriol	Estrogen		model_5	Early motor skills
cc.E3_G_m_32w_i_SG_GA_adj	0.564207	0.675289	468.816	0.835505	0.403859	mental	500	914	-0.743945	1.87237	hormone metabolite	E3-G	Estriol: E3-G	Estriol	Estrogen		model_5	Early mental skills
cc.E3_G_m_32w_i_SG_GA_adj	-0.702781	1.22178	382.896	-0.575209	0.565488	percentile_correct_raven	390	655	-3.06055	1.66005	hormone metabolite	E3-G	Estriol: E3-G	Estriol	Estrogen		model_5	Fluid intelligence
cc.E3_G_m_32w_i_SG_GA_adj	0.00697784	0.051205	416.801	0.136272	0.891672	ADHD_scaled	429	1170	-0.0920752	0.106023	hormone metabolite	E3-G	Estriol: E3-G	Estriol	Estrogen		model_5	ADHD
cc.E3_G_m_32w_i_SG_GA_adj	0.0979018	0.0563264	382.655	1.73812	0.0829949	Gen_Tot_scaled	393	669	-0.0108529	0.206773	hormone metabolite	E3-G	Estriol: E3-G	Estriol	Estrogen		model_5	Total scale
cc.E3_G_m_32w_i_SG_GA_adj	0.0606268	0.0558045	383.974	1.08641	0.277978	Gen_Ext_scaled	393	669	-0.0471371	0.16847	hormone metabolite	E3-G	Estriol: E3-G	Estriol	Estrogen		model_5	Externalizing scale
cc.E3_G_m_32w_i_SG_GA_adj	0.0781869	0.0563351	386.551	1.38789	0.16597	Gen_Int_scaled	393	669	-0.0306589	0.187015	hormone metabolite	E3-G	Estriol: E3-G	Estriol	Estrogen		model_5	Internalizing scale
cc.E3_S_m_32w_i_SG_GA_adj	0.128364	2.50594	1416	0.0512239	0.959154	hitrtse	436	1430	-4.76236	5.01909	hormone metabolite	E3-S	Estriol: E3-S	Estriol	Estrogen		model_5	Hit reaction time SE
cc.E3_S_m_32w_i_SG_GA_adj	0.267254	0.412958	477.749	0.647169	0.517834	motor	500	914	-0.534139	1.06609	hormone metabolite	E3-S	Estriol: E3-S	Estriol	Estrogen		model_5	Early motor skills
cc.E3_S_m_32w_i_SG_GA_adj	0.271913	0.421108	480.611	0.645708	0.518776	mental	500	914	-0.545033	1.08684	hormone metabolite	E3-S	Estriol: E3-S	Estriol	Estrogen		model_5	Early mental skills
cc.E3_S_m_32w_i_SG_GA_adj	1.14895	0.781851	389.755	1.46953	0.142496	percentile_correct_raven	390	655	-0.358568	2.66313	hormone metabolite	E3-S	Estriol: E3-S	Estriol	Estrogen		model_5	Fluid intelligence
cc.E3_S_m_32w_i_SG_GA_adj	-0.00111882	0.0326748	416.634	-0.0342411	0.972701	ADHD_scaled	429	1170	-0.0642936	0.0621169	hormone metabolite	E3-S	Estriol: E3-S	Estriol	Estrogen		model_5	ADHD
cc.E3_S_m_32w_i_SG_GA_adj	0.0585326	0.0359378	382.162	1.62872	0.104196	Gen_Tot_scaled	393	669	-0.0108115	0.128047	hormone metabolite	E3-S	Estriol: E3-S	Estriol	Estrogen		model_5	Total scale
cc.E3_S_m_32w_i_SG_GA_adj	0.0574805	0.0355095	383.107	1.61873	0.106327	Gen_Ext_scaled	393	669	-0.011006	0.126206	hormone metabolite	E3-S	Estriol: E3-S	Estriol	Estrogen		model_5	Externalizing scale
cc.E3_S_m_32w_i_SG_GA_adj	0.0418712	0.035952	386.13	1.16464	0.244883	Gen_Int_scaled	393	669	-0.0275335	0.111385	hormone metabolite	E3-S	Estriol: E3-S	Estriol	Estrogen		model_5	Internalizing scale
cc.E3_SG_m_32w_i_SG_GA_adj	-0.689573	2.69518	1416	-0.255854	0.798101	hitrtse	436	1430	-5.94964	4.5705	hormone metabolite	E3-SG	Estriol: E3-SG	Estriol	Estrogen		model_5	Hit reaction time SE
cc.E3_SG_m_32w_i_SG_GA_adj	0.58308	0.461692	468.435	1.26292	0.207246	motor	500	914	-0.311982	1.47673	hormone metabolite	E3-SG	Estriol: E3-SG	Estriol	Estrogen		model_5	Early motor skills
cc.E3_SG_m_32w_i_SG_GA_adj	0.631659	0.471498	472.391	1.33969	0.180992	mental	500	914	-0.283248	1.54383	hormone metabolite	E3-SG	Estriol: E3-SG	Estriol	Estrogen		model_5	Early mental skills
cc.E3_SG_m_32w_i_SG_GA_adj	0.537024	0.839817	376.294	0.639454	0.522917	percentile_correct_raven	390	655	-1.08417	2.16014	hormone metabolite	E3-SG	Estriol: E3-SG	Estriol	Estrogen		model_5	Fluid intelligence
cc.E3_SG_m_32w_i_SG_GA_adj	-0.00522781	0.0355196	411.946	-0.147181	0.883061	ADHD_scaled	429	1170	-0.0739485	0.063458	hormone metabolite	E3-SG	Estriol: E3-SG	Estriol	Estrogen		model_5	ADHD
cc.E3_SG_m_32w_i_SG_GA_adj	0.0306117	0.0388272	378.076	0.788409	0.430952	Gen_Tot_scaled	393	669	-0.0443297	0.105678	hormone metabolite	E3-SG	Estriol: E3-SG	Estriol	Estrogen		model_5	Total scale
cc.E3_SG_m_32w_i_SG_GA_adj	0.0269625	0.0383366	378.039	0.703309	0.482296	Gen_Ext_scaled	393	669	-0.0469944	0.101123	hormone metabolite	E3-SG	Estriol: E3-SG	Estriol	Estrogen		model_5	Externalizing scale
cc.E3_SG_m_32w_i_SG_GA_adj	0.0147106	0.0387559	380.676	0.37957	0.704476	Gen_Int_scaled	393	669	-0.0601355	0.0896007	hormone metabolite	E3-SG	Estriol: E3-SG	Estriol	Estrogen		model_5	Internalizing scale
cc.E4_SG_m_32w_i_SG_GA_adj	-0.589089	2.59187	1416	-0.227283	0.820236	hitrtse	436	1430	-5.64753	4.46935	hormone metabolite	E4-SG	Estriol: E4-SG	Estriol	Estrogen		model_5	Hit reaction time SE
cc.E4_SG_m_32w_i_SG_GA_adj	0.347764	0.443473	466.752	0.784183	0.433331	motor	500	914	-0.511588	1.20646	hormone metabolite	E4-SG	Estriol: E4-SG	Estriol	Estrogen		model_5	Early motor skills
cc.E4_SG_m_32w_i_SG_GA_adj	0.900517	0.45153	470.864	1.99437	0.046688	mental	500	914	0.0249732	1.7745	hormone metabolite	E4-SG	Estriol: E4-SG	Estriol	Estrogen		model_5	Early mental skills
cc.E4_SG_m_32w_i_SG_GA_adj	0.162065	0.815408	380.697	0.198753	0.842562	percentile_correct_raven	390	655	-1.4143	1.73598	hormone metabolite	E4-SG	Estriol: E4-SG	Estriol	Estrogen		model_5	Fluid intelligence
cc.E4_SG_m_32w_i_SG_GA_adj	0.0175926	0.0340714	413.541	0.516345	0.605889	ADHD_scaled	429	1170	-0.0483356	0.0834719	hormone metabolite	E4-SG	Estriol: E4-SG	Estriol	Estrogen		model_5	ADHD
cc.E4_SG_m_32w_i_SG_GA_adj	0.0605332	0.0373871	381.8	1.61909	0.106253	Gen_Tot_scaled	393	669	-0.0115975	0.132863	hormone metabolite	E4-SG	Estriol: E4-SG	Estriol	Estrogen		model_5	Total scale
cc.E4_SG_m_32w_i_SG_GA_adj	0.0474289	0.0369941	382.912	1.28207	0.200595	Gen_Ext_scaled	393	669	-0.0239358	0.119008	hormone metabolite	E4-SG	Estriol: E4-SG	Estriol	Estrogen		model_5	Externalizing scale
cc.E4_SG_m_32w_i_SG_GA_adj	0.0446101	0.0373908	385.445	1.19308	0.233574	Gen_Int_scaled	393	669	-0.0275379	0.116946	hormone metabolite	E4-SG	Estriol: E4-SG	Estriol	Estrogen		model_5	Internalizing scale
cc.epiAN_S_m_32w_i_SG_GA_adj	0.581594	1.75176	1416	0.332005	0.739935	hitrtse	436	1430	-2.83725	4.00043	hormone metabolite	epiAN-S	DHEA: epiAN-S	DHEA	Androgen		model_5	Hit reaction time SE
cc.epiAN_S_m_32w_i_SG_GA_adj	0.257821	0.298048	473.788	0.865033	0.387458	motor	500	914	-0.320903	0.834122	hormone metabolite	epiAN-S	DHEA: epiAN-S	DHEA	Androgen		model_5	Early motor skills
cc.epiAN_S_m_32w_i_SG_GA_adj	0.0555864	0.304249	476.715	0.1827	0.855111	mental	500	914	-0.534879	0.644165	hormone metabolite	epiAN-S	DHEA: epiAN-S	DHEA	Androgen		model_5	Early mental skills
cc.epiAN_S_m_32w_i_SG_GA_adj	0.0739437	0.539713	372.389	0.137006	0.8911	percentile_correct_raven	390	655	-0.967326	1.11764	hormone metabolite	epiAN-S	DHEA: epiAN-S	DHEA	Androgen		model_5	Fluid intelligence
cc.epiAN_S_m_32w_i_SG_GA_adj	0.0104832	0.0228337	411.696	0.459108	0.646399	ADHD_scaled	429	1170	-0.0336704	0.0546609	hormone metabolite	epiAN-S	DHEA: epiAN-S	DHEA	Androgen		model_5	ADHD
cc.epiAN_S_m_32w_i_SG_GA_adj	0.0314673	0.0247003	372.488	1.27396	0.203471	Gen_Tot_scaled	393	669	-0.0162474	0.0791704	hormone metabolite	epiAN-S	DHEA: epiAN-S	DHEA	Androgen		model_5	Total scale
cc.epiAN_S_m_32w_i_SG_GA_adj	0.0317436	0.0243586	371.594	1.30318	0.193321	Gen_Ext_scaled	393	669	-0.0153431	0.0787542	hormone metabolite	epiAN-S	DHEA: epiAN-S	DHEA	Androgen		model_5	Externalizing scale
cc.epiAN_S_m_32w_i_SG_GA_adj	0.0226489	0.0246288	373.62	0.91961	0.35837	Gen_Int_scaled	393	669	-0.0249321	0.0702125	hormone metabolite	epiAN-S	DHEA: epiAN-S	DHEA	Androgen		model_5	Internalizing scale
cc.Etio_G_m_32w_i_SG_GA_adj	-3.04674	2.92486	1416	-1.04167	0.297742	hitrtse	436	1430	-8.75506	2.66158	hormone metabolite	Etio-G	Testosterone: Etio-G	Testosterone	Androgen		model_5	Hit reaction time SE
cc.Etio_G_m_32w_i_SG_GA_adj	0.352318	0.497028	463.581	0.708849	0.478775	motor	500	914	-0.611857	1.31381	hormone metabolite	Etio-G	Testosterone: Etio-G	Testosterone	Androgen		model_5	Early motor skills
cc.Etio_G_m_32w_i_SG_GA_adj	0.983573	0.506492	468.352	1.94193	0.0527448	mental	500	914	0.000365055	1.96312	hormone metabolite	Etio-G	Testosterone: Etio-G	Testosterone	Androgen		model_5	Early mental skills
cc.Etio_G_m_32w_i_SG_GA_adj	-0.544881	0.89282	367.433	-0.610293	0.542045	percentile_correct_raven	390	655	-2.26962	1.17891	hormone metabolite	Etio-G	Testosterone: Etio-G	Testosterone	Androgen		model_5	Fluid intelligence
cc.Etio_G_m_32w_i_SG_GA_adj	0.0429459	0.0377482	414.762	1.13769	0.255905	ADHD_scaled	429	1170	-0.0300411	0.115993	hormone metabolite	Etio-G	Testosterone: Etio-G	Testosterone	Androgen		model_5	ADHD
cc.Etio_G_m_32w_i_SG_GA_adj	0.0209427	0.0413902	373.419	0.505983	0.613167	Gen_Tot_scaled	393	669	-0.0590383	0.100856	hormone metabolite	Etio-G	Testosterone: Etio-G	Testosterone	Androgen		model_5	Total scale
cc.Etio_G_m_32w_i_SG_GA_adj	0.00317362	0.0408322	372.356	0.0777235	0.93809	Gen_Ext_scaled	393	669	-0.0757376	0.0819955	hormone metabolite	Etio-G	Testosterone: Etio-G	Testosterone	Androgen		model_5	Externalizing scale
cc.Etio_G_m_32w_i_SG_GA_adj	0.0239738	0.041233	374.728	0.581424	0.561304	Gen_Int_scaled	393	669	-0.055732	0.103564	hormone metabolite	Etio-G	Testosterone: Etio-G	Testosterone	Androgen		model_5	Internalizing scale
cc.Etio_S_m_32w_i_SG_GA_adj	-0.621638	2.38969	1416	-0.260133	0.794799	hitrtse	436	1430	-5.2855	4.04222	hormone metabolite	Etio-S	Testosterone: Etio-S	Testosterone	Androgen		model_5	Hit reaction time SE
cc.Etio_S_m_32w_i_SG_GA_adj	0.18696	0.412017	468.34	0.453768	0.650206	motor	500	914	-0.612555	0.983884	hormone metabolite	Etio-S	Testosterone: Etio-S	Testosterone	Androgen		model_5	Early motor skills
cc.Etio_S_m_32w_i_SG_GA_adj	0.480881	0.420285	472.121	1.14418	0.253129	mental	500	914	-0.334052	1.29442	hormone metabolite	Etio-S	Testosterone: Etio-S	Testosterone	Androgen		model_5	Early mental skills
cc.Etio_S_m_32w_i_SG_GA_adj	0.372467	0.730477	363.874	0.509896	0.610434	percentile_correct_raven	390	655	-1.039	1.78236	hormone metabolite	Etio-S	Testosterone: Etio-S	Testosterone	Androgen		model_5	Fluid intelligence
cc.Etio_S_m_32w_i_SG_GA_adj	0.0100014	0.031379	409.42	0.318728	0.750095	ADHD_scaled	429	1170	-0.0507061	0.0706787	hormone metabolite	Etio-S	Testosterone: Etio-S	Testosterone	Androgen		model_5	ADHD
cc.Etio_S_m_32w_i_SG_GA_adj	0.0466006	0.0337564	368.902	1.3805	0.168269	Gen_Tot_scaled	393	669	-0.0186414	0.111756	hormone metabolite	Etio-S	Testosterone: Etio-S	Testosterone	Androgen		model_5	Total scale
cc.Etio_S_m_32w_i_SG_GA_adj	0.0550387	0.0332245	366.957	1.65657	0.0984611	Gen_Ext_scaled	393	669	-0.00918729	0.119151	hormone metabolite	Etio-S	Testosterone: Etio-S	Testosterone	Androgen		model_5	Externalizing scale
cc.Etio_S_m_32w_i_SG_GA_adj	0.0345342	0.0336337	369.126	1.02677	0.305199	Gen_Int_scaled	393	669	-0.0305018	0.0994297	hormone metabolite	Etio-S	Testosterone: Etio-S	Testosterone	Androgen		model_5	Internalizing scale
cc.F_G_m_32w_i_SG_GA_adj	2.20812	3.25342	1416	0.678708	0.497434	hitrtse	436	1430	-4.14144	8.55768	hormone metabolite	F-G	Cortisol: F-G	Cortisol	Corticosteroid		model_5	Hit reaction time SE
cc.F_G_m_32w_i_SG_GA_adj	0.255919	0.556897	468.154	0.459545	0.646056	motor	500	914	-0.824069	1.33356	hormone metabolite	F-G	Cortisol: F-G	Cortisol	Corticosteroid		model_5	Early motor skills
cc.F_G_m_32w_i_SG_GA_adj	-0.149112	0.568725	471.709	-0.262187	0.793292	mental	500	914	-1.25112	0.952407	hormone metabolite	F-G	Cortisol: F-G	Cortisol	Corticosteroid		model_5	Early mental skills
cc.F_G_m_32w_i_SG_GA_adj	-0.934043	1.0028	375.589	-0.931435	0.352227	percentile_correct_raven	390	655	-2.87141	1.00241	hormone metabolite	F-G	Cortisol: F-G	Cortisol	Corticosteroid		model_5	Fluid intelligence
cc.F_G_m_32w_i_SG_GA_adj	-0.00832475	0.0422994	412.068	-0.196806	0.844077	ADHD_scaled	429	1170	-0.0901247	0.0735095	hormone metabolite	F-G	Cortisol: F-G	Cortisol	Corticosteroid		model_5	ADHD
cc.F_G_m_32w_i_SG_GA_adj	-0.0282053	0.0461674	377.449	-0.610935	0.54161	Gen_Tot_scaled	393	669	-0.117334	0.0610288	hormone metabolite	F-G	Cortisol: F-G	Cortisol	Corticosteroid		model_5	Total scale
cc.F_G_m_32w_i_SG_GA_adj	-0.0129436	0.0455893	377.377	-0.283917	0.77663	Gen_Ext_scaled	393	669	-0.100877	0.0752679	hormone metabolite	F-G	Cortisol: F-G	Cortisol	Corticosteroid		model_5	Externalizing scale
cc.F_G_m_32w_i_SG_GA_adj	-0.0399557	0.0460054	379.458	-0.8685	0.38567	Gen_Int_scaled	393	669	-0.128875	0.0488685	hormone metabolite	F-G	Cortisol: F-G	Cortisol	Corticosteroid		model_5	Internalizing scale
cc.F_S_m_32w_i_SG_GA_adj	0.859531	3.30895	1416	0.259759	0.795087	hitrtse	436	1430	-5.59841	7.31747	hormone metabolite	F-S	Cortisol: F-S	Cortisol	Corticosteroid		model_5	Hit reaction time SE
cc.F_S_m_32w_i_SG_GA_adj	0.66696	0.558106	473.569	1.19504	0.232669	motor	500	914	-0.415249	1.74715	hormone metabolite	F-S	Cortisol: F-S	Cortisol	Corticosteroid		model_5	Early motor skills
cc.F_S_m_32w_i_SG_GA_adj	-0.0383548	0.570206	476.492	-0.0672648	0.946399	mental	500	914	-1.14356	1.06583	hormone metabolite	F-S	Cortisol: F-S	Cortisol	Corticosteroid		model_5	Early mental skills
cc.F_S_m_32w_i_SG_GA_adj	0.676662	1.03796	389.184	0.651915	0.514841	percentile_correct_raven	390	655	-1.32712	2.68349	hormone metabolite	F-S	Cortisol: F-S	Cortisol	Corticosteroid		model_5	Fluid intelligence
cc.F_S_m_32w_i_SG_GA_adj	0.00422504	0.0434007	414.979	0.0973496	0.922496	ADHD_scaled	429	1170	-0.0797566	0.0881453	hormone metabolite	F-S	Cortisol: F-S	Cortisol	Corticosteroid		model_5	ADHD
cc.F_S_m_32w_i_SG_GA_adj	0.014728	0.0478293	387.549	0.307929	0.758302	Gen_Tot_scaled	393	669	-0.0776628	0.107146	hormone metabolite	F-S	Cortisol: F-S	Cortisol	Corticosteroid		model_5	Total scale
cc.F_S_m_32w_i_SG_GA_adj	0.054183	0.0472249	389.402	1.14734	0.251946	Gen_Ext_scaled	393	669	-0.0369543	0.14553	hormone metabolite	F-S	Cortisol: F-S	Cortisol	Corticosteroid		model_5	Externalizing scale
cc.F_S_m_32w_i_SG_GA_adj	-0.0167141	0.0478028	392.182	-0.349646	0.726792	Gen_Int_scaled	393	669	-0.109129	0.075596	hormone metabolite	F-S	Cortisol: F-S	Cortisol	Corticosteroid		model_5	Internalizing scale
cc.PD_diS_1_m_32w_i_SG_GA_adj	-0.867145	3.57072	1416	-0.242849	0.808158	hitrtse	436	1430	-7.83597	6.10168	hormone metabolite	PD-diS_1	Progesterone: PD-diS_1	Progesterone	Progestogen		model_5	Hit reaction time SE
cc.PD_diS_1_m_32w_i_SG_GA_adj	0.620312	0.575124	514.946	1.07857	0.281284	motor	500	914	-0.496204	1.73325	hormone metabolite	PD-diS_1	Progesterone: PD-diS_1	Progesterone	Progestogen		model_5	Early motor skills
cc.PD_diS_1_m_32w_i_SG_GA_adj	-0.0735181	0.583862	513.153	-0.125917	0.899847	mental	500	914	-1.20835	1.05554	hormone metabolite	PD-diS_1	Progesterone: PD-diS_1	Progesterone	Progestogen		model_5	Early mental skills
cc.PD_diS_1_m_32w_i_SG_GA_adj	1.22716	1.06681	366.878	1.15031	0.250764	percentile_correct_raven	390	655	-0.829641	3.29162	hormone metabolite	PD-diS_1	Progesterone: PD-diS_1	Progesterone	Progestogen		model_5	Fluid intelligence
cc.PD_diS_1_m_32w_i_SG_GA_adj	0.0204434	0.0457987	420.755	0.446374	0.655557	ADHD_scaled	429	1170	-0.0681996	0.108995	hormone metabolite	PD-diS_1	Progesterone: PD-diS_1	Progesterone	Progestogen		model_5	ADHD
cc.PD_diS_1_m_32w_i_SG_GA_adj	0.0336626	0.0498522	386.144	0.675247	0.499923	Gen_Tot_scaled	393	669	-0.0626172	0.130004	hormone metabolite	PD-diS_1	Progesterone: PD-diS_1	Progesterone	Progestogen		model_5	Total scale
cc.PD_diS_1_m_32w_i_SG_GA_adj	0.0800923	0.0491441	387.816	1.62974	0.103968	Gen_Ext_scaled	393	669	-0.0147513	0.175143	hormone metabolite	PD-diS_1	Progesterone: PD-diS_1	Progesterone	Progestogen		model_5	Externalizing scale
cc.PD_diS_1_m_32w_i_SG_GA_adj	-0.0116963	0.0498402	390.702	-0.234675	0.814584	Gen_Int_scaled	393	669	-0.108056	0.0845384	hormone metabolite	PD-diS_1	Progesterone: PD-diS_1	Progesterone	Progestogen		model_5	Internalizing scale
cc.PD_diS_2_m_32w_i_SG_GA_adj	-2.17685	2.54133	1416	-0.856577	0.391824	hitrtse	436	1430	-7.13666	2.78296	hormone metabolite	PD_diS_2	Progesterone: PD_diS_2	Progesterone	Progestogen		model_5	Hit reaction time SE
cc.PD_diS_2_m_32w_i_SG_GA_adj	0.852497	0.431696	472.975	1.97476	0.0488765	motor	500	914	0.01545	1.68805	hormone metabolite	PD_diS_2	Progesterone: PD_diS_2	Progesterone	Progestogen		model_5	Early motor skills
cc.PD_diS_2_m_32w_i_SG_GA_adj	0.791676	0.441097	476.997	1.79479	0.0733202	mental	500	914	-0.0649529	1.64464	hormone metabolite	PD_diS_2	Progesterone: PD_diS_2	Progesterone	Progestogen		model_5	Early mental skills
cc.PD_diS_2_m_32w_i_SG_GA_adj	1.07388	0.788501	375.002	1.36192	0.174041	percentile_correct_raven	390	655	-0.448402	2.59757	hormone metabolite	PD_diS_2	Progesterone: PD_diS_2	Progesterone	Progestogen		model_5	Fluid intelligence
cc.PD_diS_2_m_32w_i_SG_GA_adj	-0.00644891	0.0333615	411.721	-0.193304	0.846816	ADHD_scaled	429	1170	-0.0710406	0.0580206	hormone metabolite	PD_diS_2	Progesterone: PD_diS_2	Progesterone	Progestogen		model_5	ADHD
cc.PD_diS_2_m_32w_i_SG_GA_adj	0.00861179	0.0363572	376.899	0.236866	0.812889	Gen_Tot_scaled	393	669	-0.0615558	0.0789086	hormone metabolite	PD_diS_2	Progesterone: PD_diS_2	Progesterone	Progestogen		model_5	Total scale
cc.PD_diS_2_m_32w_i_SG_GA_adj	0.0559669	0.0357583	376.26	1.56514	0.11839	Gen_Ext_scaled	393	669	-0.0130308	0.125115	hormone metabolite	PD_diS_2	Progesterone: PD_diS_2	Progesterone	Progestogen		model_5	Externalizing scale
cc.PD_diS_2_m_32w_i_SG_GA_adj	-0.0141537	0.036251	379.21	-0.390437	0.696433	Gen_Int_scaled	393	669	-0.0841463	0.0559104	hormone metabolite	PD_diS_2	Progesterone: PD_diS_2	Progesterone	Progestogen		model_5	Internalizing scale
cc.PD_diS_3_m_32w_i_SG_GA_adj	-6.86476	2.52263	1416	-2.72127	0.00658283	hitrtse	436	1430	-11.7881	-1.94145	hormone metabolite	PD-diS_3	Progesterone: PD-diS_3	Progesterone	Progestogen		model_5	Hit reaction time SE
cc.PD_diS_3_m_32w_i_SG_GA_adj	0.548614	0.430089	465.544	1.27558	0.20274	motor	500	914	-0.284476	1.38169	hormone metabolite	PD-diS_3	Progesterone: PD-diS_3	Progesterone	Progestogen		model_5	Early motor skills
cc.PD_diS_3_m_32w_i_SG_GA_adj	1.08415	0.437499	469.938	2.47807	0.0135596	mental	500	914	0.2359	1.93103	hormone metabolite	PD-diS_3	Progesterone: PD-diS_3	Progesterone	Progestogen		model_5	Early mental skills
cc.PD_diS_3_m_32w_i_SG_GA_adj	1.88872	0.773827	372.411	2.44076	0.0151217	percentile_correct_raven	390	655	0.395471	3.38471	hormone metabolite	PD-diS_3	Progesterone: PD-diS_3	Progesterone	Progestogen		model_5	Fluid intelligence
cc.PD_diS_3_m_32w_i_SG_GA_adj	-0.00371249	0.0329168	411.609	-0.112784	0.910257	ADHD_scaled	429	1170	-0.0674442	0.0598966	hormone metabolite	PD-diS_3	Progesterone: PD-diS_3	Progesterone	Progestogen		model_5	ADHD
cc.PD_diS_3_m_32w_i_SG_GA_adj	0.0376833	0.0357448	374.369	1.05423	0.292456	Gen_Tot_scaled	393	669	-0.0312896	0.106805	hormone metabolite	PD-diS_3	Progesterone: PD-diS_3	Progesterone	Progestogen		model_5	Total scale
cc.PD_diS_3_m_32w_i_SG_GA_adj	0.0696992	0.0351201	373.262	1.98459	0.0479215	Gen_Ext_scaled	393	669	0.00194508	0.137621	hormone metabolite	PD-diS_3	Progesterone: PD-diS_3	Progesterone	Progestogen		model_5	Externalizing scale
cc.PD_diS_3_m_32w_i_SG_GA_adj	0.0296745	0.035642	375.998	0.832569	0.405616	Gen_Int_scaled	393	669	-0.0390781	0.0986328	hormone metabolite	PD-diS_3	Progesterone: PD-diS_3	Progesterone	Progestogen		model_5	Internalizing scale
cc.PD_G_m_32w_i_SG_GA_adj	-2.71225	4.22059	1416	-0.642623	0.520573	hitrtse	436	1430	-10.9494	5.52489	hormone metabolite	PD-G	Progesterone: PD-G	Progesterone	Progestogen		model_5	Hit reaction time SE
cc.PD_G_m_32w_i_SG_GA_adj	0.0670091	0.671391	529.747	0.0998064	0.920536	motor	500	914	-1.23735	1.36588	hormone metabolite	PD-G	Progesterone: PD-G	Progesterone	Progestogen		model_5	Early motor skills
cc.PD_G_m_32w_i_SG_GA_adj	-0.148499	0.67962	526.645	-0.218503	0.827122	mental	500	914	-1.46861	1.16651	hormone metabolite	PD-G	Progesterone: PD-G	Progesterone	Progestogen		model_5	Early mental skills
cc.PD_G_m_32w_i_SG_GA_adj	-0.288273	1.2361	370.904	-0.233211	0.815726	percentile_correct_raven	390	655	-2.66984	2.10718	hormone metabolite	PD-G	Progesterone: PD-G	Progesterone	Progestogen		model_5	Fluid intelligence
cc.PD_G_m_32w_i_SG_GA_adj	0.0637913	0.0533134	421.049	1.19653	0.232162	ADHD_scaled	429	1170	-0.0393311	0.166936	hormone metabolite	PD-G	Progesterone: PD-G	Progesterone	Progestogen		model_5	ADHD
cc.PD_G_m_32w_i_SG_GA_adj	0.0219261	0.0580277	395.978	0.377855	0.705741	Gen_Tot_scaled	393	669	-0.0901556	0.134089	hormone metabolite	PD-G	Progesterone: PD-G	Progesterone	Progestogen		model_5	Total scale
cc.PD_G_m_32w_i_SG_GA_adj	0.0126836	0.0575076	400.314	0.220555	0.825551	Gen_Ext_scaled	393	669	-0.0983158	0.123942	hormone metabolite	PD-G	Progesterone: PD-G	Progesterone	Progestogen		model_5	Externalizing scale
cc.PD_G_m_32w_i_SG_GA_adj	0.00929399	0.0581222	403.043	0.159904	0.873036	Gen_Int_scaled	393	669	-0.103066	0.121571	hormone metabolite	PD-G	Progesterone: PD-G	Progesterone	Progestogen		model_5	Internalizing scale
cc.PD_S_1_m_32w_i_SG_GA_adj	-0.392935	2.30164	1416	-0.170719	0.864469	hitrtse	436	1430	-4.88495	4.09908	hormone metabolite	PD-S_1	Progesterone: PD-S_1	Progesterone	Progestogen		model_5	Hit reaction time SE
cc.PD_S_1_m_32w_i_SG_GA_adj	-0.234463	0.385566	478.729	-0.608102	0.543408	motor	500	914	-0.981592	0.512298	hormone metabolite	PD-S_1	Progesterone: PD-S_1	Progesterone	Progestogen		model_5	Early motor skills
cc.PD_S_1_m_32w_i_SG_GA_adj	-0.208028	0.393208	481.743	-0.529052	0.597013	mental	500	914	-0.969273	0.554418	hormone metabolite	PD-S_1	Progesterone: PD-S_1	Progesterone	Progestogen		model_5	Early mental skills
cc.PD_S_1_m_32w_i_SG_GA_adj	0.131565	0.704608	375.213	0.186721	0.85198	percentile_correct_raven	390	655	-1.22677	1.49584	hormone metabolite	PD-S_1	Progesterone: PD-S_1	Progesterone	Progestogen		model_5	Fluid intelligence
cc.PD_S_1_m_32w_i_SG_GA_adj	0.0387292	0.0298809	410.923	1.29612	0.195661	ADHD_scaled	429	1170	-0.0190563	0.0965351	hormone metabolite	PD-S_1	Progesterone: PD-S_1	Progesterone	Progestogen		model_5	ADHD
cc.PD_S_1_m_32w_i_SG_GA_adj	0.0712037	0.0323297	372.239	2.20242	0.028248	Gen_Tot_scaled	393	669	0.00873319	0.133624	hormone metabolite	PD-S_1	Progesterone: PD-S_1	Progesterone	Progestogen		model_5	Total scale
cc.PD_S_1_m_32w_i_SG_GA_adj	0.0621854	0.0319267	371.221	1.94776	0.0521977	Gen_Ext_scaled	393	669	0.000465751	0.123799	hormone metabolite	PD-S_1	Progesterone: PD-S_1	Progesterone	Progestogen		model_5	Externalizing scale
cc.PD_S_1_m_32w_i_SG_GA_adj	0.054297	0.0322844	373.203	1.68183	0.0934376	Gen_Int_scaled	393	669	-0.00808513	0.116634	hormone metabolite	PD-S_1	Progesterone: PD-S_1	Progesterone	Progestogen		model_5	Internalizing scale
cc.PD_S_2_m_32w_i_SG_GA_adj	-2.12191	2.26833	1416	-0.93545	0.349716	hitrtse	436	1430	-6.54891	2.30509	hormone metabolite	PD-S_2	Progesterone: PD-S_2	Progesterone	Progestogen		model_5	Hit reaction time SE
cc.PD_S_2_m_32w_i_SG_GA_adj	0.156374	0.379631	488.891	0.411911	0.680585	motor	500	914	-0.579843	0.891266	hormone metabolite	PD-S_2	Progesterone: PD-S_2	Progesterone	Progestogen		model_5	Early motor skills
cc.PD_S_2_m_32w_i_SG_GA_adj	0.0360534	0.386544	490.637	0.0932711	0.925726	mental	500	914	-0.71315	0.784802	hormone metabolite	PD-S_2	Progesterone: PD-S_2	Progesterone	Progestogen		model_5	Early mental skills
cc.PD_S_2_m_32w_i_SG_GA_adj	0.869046	0.688994	364.627	1.26133	0.207998	percentile_correct_raven	390	655	-0.459285	2.20232	hormone metabolite	PD-S_2	Progesterone: PD-S_2	Progesterone	Progestogen		model_5	Fluid intelligence
cc.PD_S_2_m_32w_i_SG_GA_adj	0.0108142	0.029559	412.228	0.365852	0.714663	ADHD_scaled	429	1170	-0.0463781	0.067971	hormone metabolite	PD-S_2	Progesterone: PD-S_2	Progesterone	Progestogen		model_5	ADHD
cc.PD_S_2_m_32w_i_SG_GA_adj	0.0570901	0.0318292	369.654	1.79364	0.0736873	Gen_Tot_scaled	393	669	-0.00441282	0.11854	hormone metabolite	PD-S_2	Progesterone: PD-S_2	Progesterone	Progestogen		model_5	Total scale
cc.PD_S_2_m_32w_i_SG_GA_adj	0.0607978	0.0313439	367.936	1.9397	0.0531797	Gen_Ext_scaled	393	669	0.00022887	0.121301	hormone metabolite	PD-S_2	Progesterone: PD-S_2	Progesterone	Progestogen		model_5	Externalizing scale
cc.PD_S_2_m_32w_i_SG_GA_adj	0.0457432	0.0317329	370.25	1.44151	0.150286	Gen_Int_scaled	393	669	-0.015594	0.106992	hormone metabolite	PD-S_2	Progesterone: PD-S_2	Progesterone	Progestogen		model_5	Internalizing scale
cc.PD_SG_1_m_32w_i_SG_GA_adj	-0.581294	2.50293	1416	-0.232245	0.816381	hitrtse	436	1430	-5.46615	4.30357	hormone metabolite	PD-SG_1	Progesterone: PD-SG_1	Progesterone	Progestogen		model_5	Hit reaction time SE
cc.PD_SG_1_m_32w_i_SG_GA_adj	-0.333422	0.430605	461.674	-0.774309	0.439144	motor	500	914	-1.16899	0.499358	hormone metabolite	PD-SG_1	Progesterone: PD-SG_1	Progesterone	Progestogen		model_5	Early motor skills
cc.PD_SG_1_m_32w_i_SG_GA_adj	-0.270145	0.440245	465.767	-0.613624	0.539764	mental	500	914	-1.12489	0.581127	hormone metabolite	PD-SG_1	Progesterone: PD-SG_1	Progesterone	Progestogen		model_5	Early mental skills
cc.PD_SG_1_m_32w_i_SG_GA_adj	0.453693	0.786108	385.788	0.577138	0.564183	percentile_correct_raven	390	655	-1.06141	1.97699	hormone metabolite	PD-SG_1	Progesterone: PD-SG_1	Progesterone	Progestogen		model_5	Fluid intelligence
cc.PD_SG_1_m_32w_i_SG_GA_adj	0.00600611	0.0329185	411.99	0.182454	0.855316	ADHD_scaled	429	1170	-0.0576717	0.0696726	hormone metabolite	PD-SG_1	Progesterone: PD-SG_1	Progesterone	Progestogen		model_5	ADHD
cc.PD_SG_1_m_32w_i_SG_GA_adj	0.0247648	0.0364046	385.037	0.680267	0.496744	Gen_Tot_scaled	393	669	-0.0456584	0.0950129	hormone metabolite	PD-SG_1	Progesterone: PD-SG_1	Progesterone	Progestogen		model_5	Total scale
cc.PD_SG_1_m_32w_i_SG_GA_adj	0.0359622	0.0359626	386.503	0.99999	0.317941	Gen_Ext_scaled	393	669	-0.0335496	0.105403	hormone metabolite	PD-SG_1	Progesterone: PD-SG_1	Progesterone	Progestogen		model_5	Externalizing scale
cc.PD_SG_1_m_32w_i_SG_GA_adj	-0.000199578	0.0363785	388.724	-0.00548616	0.995626	Gen_Int_scaled	393	669	-0.0706171	0.0699735	hormone metabolite	PD-SG_1	Progesterone: PD-SG_1	Progesterone	Progestogen		model_5	Internalizing scale
cc.PD_SG_2_m_32w_i_SG_GA_adj	1.02536	2.12623	1416	0.482246	0.629706	hitrtse	436	1430	-3.1243	5.17503	hormone metabolite	PD-SG_2	Progesterone: PD-SG_2	Progesterone	Progestogen		model_5	Hit reaction time SE
cc.PD_SG_2_m_32w_i_SG_GA_adj	0.0861286	0.365029	457.136	0.23595	0.813577	motor	500	914	-0.620277	0.793781	hormone metabolite	PD-SG_2	Progesterone: PD-SG_2	Progesterone	Progestogen		model_5	Early motor skills
cc.PD_SG_2_m_32w_i_SG_GA_adj	0.0601443	0.373425	461.751	0.161061	0.872115	mental	500	914	-0.663455	0.783237	hormone metabolite	PD-SG_2	Progesterone: PD-SG_2	Progesterone	Progestogen		model_5	Early mental skills
cc.PD_SG_2_m_32w_i_SG_GA_adj	0.749355	0.655055	375.065	1.14396	0.253371	percentile_correct_raven	390	655	-0.515078	2.01543	hormone metabolite	PD-SG_2	Progesterone: PD-SG_2	Progesterone	Progestogen		model_5	Fluid intelligence
cc.PD_SG_2_m_32w_i_SG_GA_adj	-0.0105631	0.0276903	410.834	-0.381474	0.703049	ADHD_scaled	429	1170	-0.064149	0.0429692	hormone metabolite	PD-SG_2	Progesterone: PD-SG_2	Progesterone	Progestogen		model_5	ADHD
cc.PD_SG_2_m_32w_i_SG_GA_adj	0.00304241	0.030307	376.34	0.100386	0.920091	Gen_Tot_scaled	393	669	-0.0554926	0.0615909	hormone metabolite	PD-SG_2	Progesterone: PD-SG_2	Progesterone	Progestogen		model_5	Total scale
cc.PD_SG_2_m_32w_i_SG_GA_adj	0.00506459	0.0299074	375.895	0.169342	0.865618	Gen_Ext_scaled	393	669	-0.0526766	0.0628601	hormone metabolite	PD-SG_2	Progesterone: PD-SG_2	Progesterone	Progestogen		model_5	Externalizing scale
cc.PD_SG_2_m_32w_i_SG_GA_adj	-0.00526146	0.0302141	378.246	-0.174139	0.861849	Gen_Int_scaled	393	669	-0.0636051	0.0531253	hormone metabolite	PD-SG_2	Progesterone: PD-SG_2	Progesterone	Progestogen		model_5	Internalizing scale
cc.PD_SG_4_m_32w_i_SG_GA_adj	-2.61119	2.60703	1416	-1.0016	0.31671	hitrtse	436	1430	-7.69922	2.47684	hormone metabolite	PD-SG_4	Progesterone: PD-SG_4	Progesterone	Progestogen		model_5	Hit reaction time SE
cc.PD_SG_4_m_32w_i_SG_GA_adj	0.261982	0.44673	476.215	0.586443	0.557855	motor	500	914	-0.603871	1.12698	hormone metabolite	PD-SG_4	Progesterone: PD-SG_4	Progesterone	Progestogen		model_5	Early motor skills
cc.PD_SG_4_m_32w_i_SG_GA_adj	0.317386	0.455631	479.22	0.696585	0.4864	mental	500	914	-0.566159	1.19939	hormone metabolite	PD-SG_4	Progesterone: PD-SG_4	Progesterone	Progestogen		model_5	Early mental skills
cc.PD_SG_4_m_32w_i_SG_GA_adj	1.47715	0.804899	374.46	1.8352	0.0672688	percentile_correct_raven	390	655	-0.0742047	3.03598	hormone metabolite	PD-SG_4	Progesterone: PD-SG_4	Progesterone	Progestogen		model_5	Fluid intelligence
cc.PD_SG_4_m_32w_i_SG_GA_adj	-0.0251812	0.0344187	410.363	-0.731614	0.464822	ADHD_scaled	429	1170	-0.0917538	0.0413908	hormone metabolite	PD-SG_4	Progesterone: PD-SG_4	Progesterone	Progestogen		model_5	ADHD
cc.PD_SG_4_m_32w_i_SG_GA_adj	0.00646576	0.0374068	376.158	0.17285	0.862862	Gen_Tot_scaled	393	669	-0.0657546	0.0787585	hormone metabolite	PD-SG_4	Progesterone: PD-SG_4	Progesterone	Progestogen		model_5	Total scale
cc.PD_SG_4_m_32w_i_SG_GA_adj	0.0430475	0.0368334	375.167	1.16871	0.243263	Gen_Ext_scaled	393	669	-0.0279965	0.11431	hormone metabolite	PD-SG_4	Progesterone: PD-SG_4	Progesterone	Progestogen		model_5	Externalizing scale
cc.PD_SG_4_m_32w_i_SG_GA_adj	-0.0197897	0.0372794	378.09	-0.530849	0.595835	Gen_Int_scaled	393	669	-0.0918066	0.0522188	hormone metabolite	PD-SG_4	Progesterone: PD-SG_4	Progesterone	Progestogen		model_5	Internalizing scale
cc.PD_SG_5_m_32w_i_SG_GA_adj	-3.67245	3.08863	1416	-1.18902	0.234631	hitrtse	436	1430	-9.7004	2.3555	hormone metabolite	PD-SG_5	Progesterone: PD-SG_5	Progesterone	Progestogen		model_5	Hit reaction time SE
cc.PD_SG_5_m_32w_i_SG_GA_adj	0.459194	0.523318	470.079	0.877468	0.380681	motor	500	914	-0.555634	1.47192	hormone metabolite	PD-SG_5	Progesterone: PD-SG_5	Progesterone	Progestogen		model_5	Early motor skills
cc.PD_SG_5_m_32w_i_SG_GA_adj	0.297509	0.534516	473.574	0.556595	0.578067	mental	500	914	-0.739444	1.33178	hormone metabolite	PD-SG_5	Progesterone: PD-SG_5	Progesterone	Progestogen		model_5	Early mental skills
cc.PD_SG_5_m_32w_i_SG_GA_adj	1.12569	0.957107	376.488	1.17613	0.240284	percentile_correct_raven	390	655	-0.720386	2.97741	hormone metabolite	PD-SG_5	Progesterone: PD-SG_5	Progesterone	Progestogen		model_5	Fluid intelligence
cc.PD_SG_5_m_32w_i_SG_GA_adj	-0.0116765	0.0401221	416.36	-0.291024	0.771178	ADHD_scaled	429	1170	-0.0893302	0.0658918	hormone metabolite	PD-SG_5	Progesterone: PD-SG_5	Progesterone	Progestogen		model_5	ADHD
cc.PD_SG_5_m_32w_i_SG_GA_adj	0.0261101	0.0443947	380.896	0.588136	0.55679	Gen_Tot_scaled	393	669	-0.0595636	0.111966	hormone metabolite	PD-SG_5	Progesterone: PD-SG_5	Progesterone	Progestogen		model_5	Total scale
cc.PD_SG_5_m_32w_i_SG_GA_adj	0.0468338	0.0437928	380.986	1.06944	0.285548	Gen_Ext_scaled	393	669	-0.0376009	0.131627	hormone metabolite	PD-SG_5	Progesterone: PD-SG_5	Progesterone	Progestogen		model_5	Externalizing scale
cc.PD_SG_5_m_32w_i_SG_GA_adj	0.00472013	0.0443331	384.094	0.10647	0.915265	Gen_Int_scaled	393	669	-0.080889	0.0904054	hormone metabolite	PD-SG_5	Progesterone: PD-SG_5	Progesterone	Progestogen		model_5	Internalizing scale
cc.PT_diS_m_32w_i_SG_GA_adj	-1.36748	2.07017	1416	-0.660565	0.508999	hitrtse	436	1430	-5.40775	2.67278	hormone metabolite	PT-diS	17-hydroxy-progesterone: PT-diS	17-hydroxy-progesterone	Progestogen		model_5	Hit reaction time SE
cc.PT_diS_m_32w_i_SG_GA_adj	0.152955	0.351709	468.639	0.434891	0.663842	motor	500	914	-0.527612	0.835045	hormone metabolite	PT-diS	17-hydroxy-progesterone: PT-diS	17-hydroxy-progesterone	Progestogen		model_5	Early motor skills
cc.PT_diS_m_32w_i_SG_GA_adj	0.65872	0.358111	472.822	1.83943	0.066479	mental	500	914	-0.0357243	1.35187	hormone metabolite	PT-diS	17-hydroxy-progesterone: PT-diS	17-hydroxy-progesterone	Progestogen		model_5	Early mental skills
cc.PT_diS_m_32w_i_SG_GA_adj	0.716136	0.646747	378.575	1.10729	0.268872	percentile_correct_raven	390	655	-0.532535	1.96599	hormone metabolite	PT-diS	17-hydroxy-progesterone: PT-diS	17-hydroxy-progesterone	Progestogen		model_5	Fluid intelligence
cc.PT_diS_m_32w_i_SG_GA_adj	-0.0060518	0.0268857	414.961	-0.225094	0.822017	ADHD_scaled	429	1170	-0.0580935	0.0459188	hormone metabolite	PT-diS	17-hydroxy-progesterone: PT-diS	17-hydroxy-progesterone	Progestogen		model_5	ADHD
cc.PT_diS_m_32w_i_SG_GA_adj	0.0214477	0.0295357	375.894	0.726162	0.468192	Gen_Tot_scaled	393	669	-0.0355571	0.0785499	hormone metabolite	PT-diS	17-hydroxy-progesterone: PT-diS	17-hydroxy-progesterone	Progestogen		model_5	Total scale
cc.PT_diS_m_32w_i_SG_GA_adj	0.0287534	0.029127	375.371	0.987176	0.324192	Gen_Ext_scaled	393	669	-0.0274583	0.0850656	hormone metabolite	PT-diS	17-hydroxy-progesterone: PT-diS	17-hydroxy-progesterone	Progestogen		model_5	Externalizing scale
cc.PT_diS_m_32w_i_SG_GA_adj	0.0151319	0.029454	377.758	0.513746	0.60773	Gen_Int_scaled	393	669	-0.0416957	0.0721064	hormone metabolite	PT-diS	17-hydroxy-progesterone: PT-diS	17-hydroxy-progesterone	Progestogen		model_5	Internalizing scale
cc.PT_G_m_32w_i_SG_GA_adj	-3.49112	3.96156	1416	-0.881249	0.378333	hitrtse	436	1430	-11.2227	4.24048	hormone metabolite	PT-G	17-hydroxy-progesterone: PT-G	17-hydroxy-progesterone	Progestogen		model_5	Hit reaction time SE
cc.PT_G_m_32w_i_SG_GA_adj	-0.0423425	0.680503	467.049	-0.0622224	0.950412	motor	500	914	-1.36179	1.27465	hormone metabolite	PT-G	17-hydroxy-progesterone: PT-G	17-hydroxy-progesterone	Progestogen		model_5	Early motor skills
cc.PT_G_m_32w_i_SG_GA_adj	0.408459	0.694952	471.096	0.587752	0.556981	mental	500	914	-0.940126	1.75283	hormone metabolite	PT-G	17-hydroxy-progesterone: PT-G	17-hydroxy-progesterone	Progestogen		model_5	Early mental skills
cc.PT_G_m_32w_i_SG_GA_adj	-0.275903	1.23063	381.502	-0.224196	0.822725	percentile_correct_raven	390	655	-2.64978	2.10522	hormone metabolite	PT-G	17-hydroxy-progesterone: PT-G	17-hydroxy-progesterone	Progestogen		model_5	Fluid intelligence
cc.PT_G_m_32w_i_SG_GA_adj	0.00800548	0.0516468	414.327	0.155004	0.876893	ADHD_scaled	429	1170	-0.0919335	0.107868	hormone metabolite	PT-G	17-hydroxy-progesterone: PT-G	17-hydroxy-progesterone	Progestogen		model_5	ADHD
cc.PT_G_m_32w_i_SG_GA_adj	-0.0213	0.0567715	381.918	-0.375189	0.707728	Gen_Tot_scaled	393	669	-0.131021	0.088323	hormone metabolite	PT-G	17-hydroxy-progesterone: PT-G	17-hydroxy-progesterone	Progestogen		model_5	Total scale
cc.PT_G_m_32w_i_SG_GA_adj	-0.0386327	0.0560687	382.926	-0.689024	0.491225	Gen_Ext_scaled	393	669	-0.146967	0.0696565	hormone metabolite	PT-G	17-hydroxy-progesterone: PT-G	17-hydroxy-progesterone	Progestogen		model_5	Externalizing scale
cc.PT_G_m_32w_i_SG_GA_adj	-0.0227576	0.0566668	385.21	-0.401604	0.688198	Gen_Int_scaled	393	669	-0.132368	0.0865983	hormone metabolite	PT-G	17-hydroxy-progesterone: PT-G	17-hydroxy-progesterone	Progestogen		model_5	Internalizing scale
cc.T_G_m_32w_i_SG_GA_adj	-2.88404	2.58876	1416	-1.11406	0.265442	hitrtse	436	1430	-7.9364	2.16833	hormone metabolite	T-G	Testosterone: T-G	Testosterone	Androgen		model_5	Hit reaction time SE
cc.T_G_m_32w_i_SG_GA_adj	-0.13901	0.433201	468.509	-0.32089	0.748437	motor	500	914	-0.976559	0.702151	hormone metabolite	T-G	Testosterone: T-G	Testosterone	Androgen		model_5	Early motor skills
cc.T_G_m_32w_i_SG_GA_adj	-0.249886	0.44218	472.039	-0.565124	0.572258	mental	500	914	-1.1067	0.606529	hormone metabolite	T-G	Testosterone: T-G	Testosterone	Androgen		model_5	Early mental skills
cc.T_G_m_32w_i_SG_GA_adj	-0.176698	0.806655	379.59	-0.219051	0.826728	percentile_correct_raven	390	655	-1.73239	1.38445	hormone metabolite	T-G	Testosterone: T-G	Testosterone	Androgen		model_5	Fluid intelligence
cc.T_G_m_32w_i_SG_GA_adj	0.001476	0.0333863	416.428	0.0442099	0.964758	ADHD_scaled	429	1170	-0.0630887	0.0660733	hormone metabolite	T-G	Testosterone: T-G	Testosterone	Androgen		model_5	ADHD
cc.T_G_m_32w_i_SG_GA_adj	-0.0189413	0.0370923	377.255	-0.510654	0.609892	Gen_Tot_scaled	393	669	-0.0904767	0.0528476	hormone metabolite	T-G	Testosterone: T-G	Testosterone	Androgen		model_5	Total scale
cc.T_G_m_32w_i_SG_GA_adj	-0.0129737	0.0366169	376.935	-0.35431	0.723305	Gen_Ext_scaled	393	669	-0.0835427	0.0579686	hormone metabolite	T-G	Testosterone: T-G	Testosterone	Androgen		model_5	Externalizing scale
cc.T_G_m_32w_i_SG_GA_adj	-0.00904347	0.036988	379.126	-0.244497	0.806978	Gen_Int_scaled	393	669	-0.0804464	0.0624594	hormone metabolite	T-G	Testosterone: T-G	Testosterone	Androgen		model_5	Internalizing scale
cc.T_S_m_32w_i_SG_GA_adj	0.537823	2.47544	1416	0.217264	0.828034	hitrtse	436	1430	-4.29339	5.36903	hormone metabolite	T-S	Testosterone: T-S	Testosterone	Androgen		model_5	Hit reaction time SE
cc.T_S_m_32w_i_SG_GA_adj	-0.103906	0.419776	466.426	-0.247528	0.804608	motor	500	914	-0.916465	0.709807	hormone metabolite	T-S	Testosterone: T-S	Testosterone	Androgen		model_5	Early motor skills
cc.T_S_m_32w_i_SG_GA_adj	-0.101556	0.428773	470.213	-0.236853	0.812874	mental	500	914	-0.9322	0.729051	hormone metabolite	T-S	Testosterone: T-S	Testosterone	Androgen		model_5	Early mental skills
cc.T_S_m_32w_i_SG_GA_adj	-0.756971	0.76802	380.323	-0.985614	0.324949	percentile_correct_raven	390	655	-2.2399	0.727221	hormone metabolite	T-S	Testosterone: T-S	Testosterone	Androgen		model_5	Fluid intelligence
cc.T_S_m_32w_i_SG_GA_adj	0.0425152	0.0323662	412.85	1.31357	0.189721	ADHD_scaled	429	1170	-0.0200833	0.105126	hormone metabolite	T-S	Testosterone: T-S	Testosterone	Androgen		model_5	ADHD
cc.T_S_m_32w_i_SG_GA_adj	0.0800092	0.0352562	378.158	2.26936	0.0238089	Gen_Tot_scaled	393	669	0.0120232	0.148253	hormone metabolite	T-S	Testosterone: T-S	Testosterone	Androgen		model_5	Total scale
cc.T_S_m_32w_i_SG_GA_adj	0.0863071	0.0347653	378.396	2.48256	0.0134769	Gen_Ext_scaled	393	669	0.0192794	0.153613	hormone metabolite	T-S	Testosterone: T-S	Testosterone	Androgen		model_5	Externalizing scale
cc.T_S_m_32w_i_SG_GA_adj	0.0441965	0.0353612	381.819	1.24986	0.212117	Gen_Int_scaled	393	669	-0.0240204	0.112617	hormone metabolite	T-S	Testosterone: T-S	Testosterone	Androgen		model_5	Internalizing scale
cc.THE_G_m_32w_i_SG_GA_adj	-4.82646	3.68358	1416	-1.31026	0.190319	hitrtse	436	1430	-12.0155	2.36262	hormone metabolite	THE-G	Cortisol: THE-G	Cortisol	Corticosteroid		model_5	Hit reaction time SE
cc.THE_G_m_32w_i_SG_GA_adj	0.489145	0.623446	471.913	0.784583	0.433092	motor	500	914	-0.71981	1.69572	hormone metabolite	THE-G	Cortisol: THE-G	Cortisol	Corticosteroid		model_5	Early motor skills
cc.THE_G_m_32w_i_SG_GA_adj	0.681492	0.635802	475.027	1.07186	0.284326	mental	500	914	-0.549871	1.91363	hormone metabolite	THE-G	Cortisol: THE-G	Cortisol	Corticosteroid		model_5	Early mental skills
cc.THE_G_m_32w_i_SG_GA_adj	-1.93047	1.13303	359.782	-1.70381	0.0892807	percentile_correct_raven	390	655	-4.1189	0.256892	hormone metabolite	THE-G	Cortisol: THE-G	Cortisol	Corticosteroid		model_5	Fluid intelligence
cc.THE_G_m_32w_i_SG_GA_adj	-0.00676378	0.0477456	419.951	-0.141663	0.887414	ADHD_scaled	429	1170	-0.0990752	0.0856495	hormone metabolite	THE-G	Cortisol: THE-G	Cortisol	Corticosteroid		model_5	ADHD
cc.THE_G_m_32w_i_SG_GA_adj	0.00915084	0.0528227	367.012	0.173237	0.862561	Gen_Tot_scaled	393	669	-0.0928435	0.111194	hormone metabolite	THE-G	Cortisol: THE-G	Cortisol	Corticosteroid		model_5	Total scale
cc.THE_G_m_32w_i_SG_GA_adj	-0.0265981	0.052012	364.723	-0.511383	0.609392	Gen_Ext_scaled	393	669	-0.12699	0.0739067	hormone metabolite	THE-G	Cortisol: THE-G	Cortisol	Corticosteroid		model_5	Externalizing scale
cc.THE_G_m_32w_i_SG_GA_adj	0.0389497	0.052519	366.991	0.741631	0.458786	Gen_Int_scaled	393	669	-0.062577	0.140299	hormone metabolite	THE-G	Cortisol: THE-G	Cortisol	Corticosteroid		model_5	Internalizing scale
ratio_11b_hsd1_GA_adj	7.97437	4.99973	1416	1.59496	0.110944	hitrtse	436	1430	-1.78339	17.7321	phase I ratio	11b-hydroxysteroid dehydrogenase type 1					model_5	Hit reaction time SE
ratio_11b_hsd1_GA_adj	-0.486561	0.843955	471.521	-0.576525	0.564535	motor	500	914	-2.12226	1.14747	phase I ratio	11b-hydroxysteroid dehydrogenase type 1					model_5	Early motor skills
ratio_11b_hsd1_GA_adj	-1.26954	0.859531	474.486	-1.47701	0.140335	mental	500	914	-2.93624	0.394223	phase I ratio	11b-hydroxysteroid dehydrogenase type 1					model_5	Early mental skills
ratio_11b_hsd1_GA_adj	1.1819	1.56151	379.854	0.756898	0.44958	percentile_correct_raven	390	655	-1.83337	4.19917	phase I ratio	11b-hydroxysteroid dehydrogenase type 1					model_5	Fluid intelligence
ratio_11b_hsd1_GA_adj	0.0540049	0.0654149	417.662	0.825576	0.409516	ADHD_scaled	429	1170	-0.0725298	0.180546	phase I ratio	11b-hydroxysteroid dehydrogenase type 1					model_5	ADHD
ratio_11b_hsd1_GA_adj	0.0100476	0.0720741	383.746	0.139406	0.889202	Gen_Tot_scaled	393	669	-0.129246	0.149229	phase I ratio	11b-hydroxysteroid dehydrogenase type 1					model_5	Total scale
ratio_11b_hsd1_GA_adj	0.0632519	0.0711717	385.162	0.888723	0.374707	Gen_Ext_scaled	393	669	-0.0742908	0.200695	phase I ratio	11b-hydroxysteroid dehydrogenase type 1					model_5	Externalizing scale
ratio_11b_hsd1_GA_adj	-0.0536604	0.0719203	387.409	-0.746109	0.456054	Gen_Int_scaled	393	669	-0.19267	0.0852291	phase I ratio	11b-hydroxysteroid dehydrogenase type 1					model_5	Internalizing scale
ratio_11b_hsd2_GA_adj	-7.97513	4.99969	1416	-1.59512	0.110908	hitrtse	436	1430	-17.7328	1.78255	phase I ratio	11b-hydroxysteroid dehydrogenase type 2					model_5	Hit reaction time SE
ratio_11b_hsd2_GA_adj	0.486554	0.843949	471.521	0.576521	0.564538	motor	500	914	-1.14746	2.12224	phase I ratio	11b-hydroxysteroid dehydrogenase type 2					model_5	Early motor skills
ratio_11b_hsd2_GA_adj	1.26961	0.859525	474.486	1.47711	0.140309	mental	500	914	-0.394137	2.9363	phase I ratio	11b-hydroxysteroid dehydrogenase type 2					model_5	Early mental skills
ratio_11b_hsd2_GA_adj	-1.18167	1.5615	379.854	-0.756754	0.449666	percentile_correct_raven	390	655	-4.19892	1.83358	phase I ratio	11b-hydroxysteroid dehydrogenase type 2					model_5	Fluid intelligence
ratio_11b_hsd2_GA_adj	-0.0540063	0.0654144	417.663	-0.825603	0.409501	ADHD_scaled	429	1170	-0.180546	0.0725275	phase I ratio	11b-hydroxysteroid dehydrogenase type 2					model_5	ADHD
ratio_11b_hsd2_GA_adj	-0.0100499	0.0720736	383.745	-0.13944	0.889176	Gen_Tot_scaled	393	669	-0.14923	0.129243	phase I ratio	11b-hydroxysteroid dehydrogenase type 2					model_5	Total scale
ratio_11b_hsd2_GA_adj	-0.0632536	0.0711712	385.161	-0.888752	0.374691	Gen_Ext_scaled	393	669	-0.200696	0.0742883	phase I ratio	11b-hydroxysteroid dehydrogenase type 2					model_5	Externalizing scale
ratio_11b_hsd2_GA_adj	0.0536609	0.0719198	387.409	0.746121	0.456047	Gen_Int_scaled	393	669	-0.0852277	0.19267	phase I ratio	11b-hydroxysteroid dehydrogenase type 2					model_5	Internalizing scale
ratio_16a_hydroxylase_GA_adj	0.769426	1.92943	1416	0.398784	0.690112	hitrtse	436	1430	-2.99616	4.53501	phase I ratio	16a-hydroxylase					model_5	Hit reaction time SE
ratio_16a_hydroxylase_GA_adj	-0.0791695	0.324614	463.496	-0.243888	0.807425	motor	500	914	-0.708594	0.549003	phase I ratio	16a-hydroxylase					model_5	Early motor skills
ratio_16a_hydroxylase_GA_adj	-0.105827	0.331716	467.541	-0.31903	0.749847	mental	500	914	-0.748772	0.536422	phase I ratio	16a-hydroxylase					model_5	Early mental skills
ratio_16a_hydroxylase_GA_adj	0.50207	0.601444	381.467	0.834774	0.404367	percentile_correct_raven	390	655	-0.660798	1.6629	phase I ratio	16a-hydroxylase					model_5	Fluid intelligence
ratio_16a_hydroxylase_GA_adj	-0.013711	0.0250418	412.435	-0.547523	0.584316	ADHD_scaled	429	1170	-0.0621745	0.0347005	phase I ratio	16a-hydroxylase					model_5	ADHD
ratio_16a_hydroxylase_GA_adj	-0.00409798	0.0275591	381.081	-0.148698	0.881871	Gen_Tot_scaled	393	669	-0.0573373	0.0491384	phase I ratio	16a-hydroxylase					model_5	Total scale
ratio_16a_hydroxylase_GA_adj	-0.00788824	0.0272228	381.745	-0.289766	0.772152	Gen_Ext_scaled	393	669	-0.0604551	0.0447199	phase I ratio	16a-hydroxylase					model_5	Externalizing scale
ratio_16a_hydroxylase_GA_adj	0.00630376	0.027504	384.096	0.229194	0.81884	Gen_Int_scaled	393	669	-0.0468381	0.0594311	phase I ratio	16a-hydroxylase					model_5	Internalizing scale
ratio_17b_hsd_GA_adj	0.30309	1.47494	1416	0.205493	0.837216	hitrtse	436	1430	-2.57548	3.18166	phase I ratio	17b-hydroxysteroid dehydrogenase (17bHSD)					model_5	Hit reaction time SE
ratio_17b_hsd_GA_adj	-0.0843152	0.251524	467.164	-0.335218	0.737611	motor	500	914	-0.570678	0.403951	phase I ratio	17b-hydroxysteroid dehydrogenase (17bHSD)					model_5	Early motor skills
ratio_17b_hsd_GA_adj	-0.0494922	0.256892	470.842	-0.192658	0.84731	mental	500	914	-0.546662	0.448716	phase I ratio	17b-hydroxysteroid dehydrogenase (17bHSD)					model_5	Early mental skills
ratio_17b_hsd_GA_adj	-0.587001	0.456926	369.53	-1.28468	0.19971	percentile_correct_raven	390	655	-1.4698	0.295144	phase I ratio	17b-hydroxysteroid dehydrogenase (17bHSD)					model_5	Fluid intelligence
ratio_17b_hsd_GA_adj	-0.00204894	0.0193023	413.186	-0.10615	0.915515	ADHD_scaled	429	1170	-0.0393716	0.0353002	phase I ratio	17b-hydroxysteroid dehydrogenase (17bHSD)					model_5	ADHD
ratio_17b_hsd_GA_adj	0.00201798	0.0211738	373.367	0.0953057	0.924123	Gen_Tot_scaled	393	669	-0.0388857	0.04291	phase I ratio	17b-hydroxysteroid dehydrogenase (17bHSD)					model_5	Total scale
ratio_17b_hsd_GA_adj	-0.00659532	0.0208793	372.338	-0.315879	0.752271	Gen_Ext_scaled	393	669	-0.0469321	0.0337224	phase I ratio	17b-hydroxysteroid dehydrogenase (17bHSD)					model_5	Externalizing scale
ratio_17b_hsd_GA_adj	0.000319596	0.0210948	374.629	0.0151505	0.98792	Gen_Int_scaled	393	669	-0.0404226	0.0410706	phase I ratio	17b-hydroxysteroid dehydrogenase (17bHSD)					model_5	Internalizing scale
ratio_20a_reductase_GA_adj	0.31578	3.26589	1416	0.0966902	0.922986	hitrtse	436	1430	-6.05813	6.68969	phase I ratio	20a-reductase					model_5	Hit reaction time SE
ratio_20a_reductase_GA_adj	-1.90878	0.559586	461.129	-3.41106	0.000704059	motor	500	914	-2.9924	-0.824672	phase I ratio	20a-reductase					model_5	Early motor skills
ratio_20a_reductase_GA_adj	-2.15971	0.570406	465.048	-3.78627	0.000172956	mental	500	914	-3.26456	-1.0547	phase I ratio	20a-reductase					model_5	Early mental skills
ratio_20a_reductase_GA_adj	-1.06184	1.04927	391.052	-1.01197	0.312177	percentile_correct_raven	390	655	-3.08562	0.969511	phase I ratio	20a-reductase					model_5	Fluid intelligence
ratio_20a_reductase_GA_adj	0.0276466	0.0429362	419.878	0.643901	0.519991	ADHD_scaled	429	1170	-0.0553507	0.110767	phase I ratio	20a-reductase					model_5	ADHD
ratio_20a_reductase_GA_adj	0.00883441	0.0482266	385.543	0.183185	0.854749	Gen_Tot_scaled	393	669	-0.0843702	0.101969	phase I ratio	20a-reductase					model_5	Total scale
ratio_20a_reductase_GA_adj	-0.0252625	0.0476645	387.137	-0.530006	0.596411	Gen_Ext_scaled	393	669	-0.117426	0.0667462	phase I ratio	20a-reductase					model_5	Externalizing scale
ratio_20a_reductase_GA_adj	0.0139299	0.0481787	389.751	0.28913	0.772636	Gen_Int_scaled	393	669	-0.0791979	0.106971	phase I ratio	20a-reductase					model_5	Internalizing scale
ratio_20b_reductase_GA_adj	-2.89202	2.62735	1416	-1.10074	0.271198	hitrtse	436	1430	-8.01972	2.23567	phase I ratio	20b-reductase					model_5	Hit reaction time SE
ratio_20b_reductase_GA_adj	-0.367727	0.450576	467.99	-0.816126	0.414843	motor	500	914	-1.24159	0.504108	phase I ratio	20b-reductase					model_5	Early motor skills
ratio_20b_reductase_GA_adj	0.136114	0.460502	471.889	0.295579	0.767682	mental	500	914	-0.75581	1.0284	phase I ratio	20b-reductase					model_5	Early mental skills
ratio_20b_reductase_GA_adj	-0.754766	0.814141	382.147	-0.927071	0.354475	percentile_correct_raven	390	655	-2.32843	0.816972	phase I ratio	20b-reductase					model_5	Fluid intelligence
ratio_20b_reductase_GA_adj	0.0339425	0.034671	411.071	0.978988	0.328162	ADHD_scaled	429	1170	-0.0330918	0.101031	phase I ratio	20b-reductase					model_5	ADHD
ratio_20b_reductase_GA_adj	0.0270467	0.0376811	385.244	0.717779	0.473329	Gen_Tot_scaled	393	669	-0.045884	0.099731	phase I ratio	20b-reductase					model_5	Total scale
ratio_20b_reductase_GA_adj	0.0100322	0.0372707	386.607	0.269171	0.787942	Gen_Ext_scaled	393	669	-0.0622029	0.0818627	phase I ratio	20b-reductase					model_5	Externalizing scale
ratio_20b_reductase_GA_adj	0.0222023	0.0376467	389.21	0.589753	0.555699	Gen_Int_scaled	393	669	-0.0506718	0.0948223	phase I ratio	20b-reductase					model_5	Internalizing scale
ratio_3b_hsd_GA_adj	2.20918	2.28114	1416	0.968456	0.332982	hitrtse	436	1430	-2.24282	6.66119	phase I ratio	3b-hydroxysteroid dehydrogenase (3bHSD)					model_5	Hit reaction time SE
ratio_3b_hsd_GA_adj	-0.46536	0.384071	473.898	-1.21165	0.22625	motor	500	914	-1.20897	0.27908	phase I ratio	3b-hydroxysteroid dehydrogenase (3bHSD)					model_5	Early motor skills
ratio_3b_hsd_GA_adj	-0.196919	0.392357	477.072	-0.501887	0.615979	mental	500	914	-0.956585	0.563716	phase I ratio	3b-hydroxysteroid dehydrogenase (3bHSD)					model_5	Early mental skills
ratio_3b_hsd_GA_adj	-0.681246	0.705104	377.034	-0.966163	0.334582	percentile_correct_raven	390	655	-2.04621	0.678247	phase I ratio	3b-hydroxysteroid dehydrogenase (3bHSD)					model_5	Fluid intelligence
ratio_3b_hsd_GA_adj	-0.0339045	0.0296292	415.451	-1.14429	0.253161	ADHD_scaled	429	1170	-0.0912311	0.023394	phase I ratio	3b-hydroxysteroid dehydrogenase (3bHSD)					model_5	ADHD
ratio_3b_hsd_GA_adj	-0.0546751	0.0323919	375.399	-1.68793	0.0922558	Gen_Tot_scaled	393	669	-0.117311	0.00783104	phase I ratio	3b-hydroxysteroid dehydrogenase (3bHSD)					model_5	Total scale
ratio_3b_hsd_GA_adj	-0.0534107	0.0319715	375.198	-1.67057	0.0956406	Gen_Ext_scaled	393	669	-0.115206	0.00830368	phase I ratio	3b-hydroxysteroid dehydrogenase (3bHSD)					model_5	Externalizing scale
ratio_3b_hsd_GA_adj	-0.053624	0.0322876	377.003	-1.66082	0.0975809	Gen_Int_scaled	393	669	-0.116104	0.00865065	phase I ratio	3b-hydroxysteroid dehydrogenase (3bHSD)					model_5	Internalizing scale
ratio_5a_reductase_GA_adj	11.0829	5.06996	1416	2.18599	0.0289798	hitrtse	436	1430	1.18805	20.9777	phase I ratio	5a- reductase (SRD5As)					model_5	Hit reaction time SE
ratio_5a_reductase_GA_adj	0.0911161	0.856385	468.76	0.106396	0.915314	motor	500	914	-1.56706	1.75072	phase I ratio	5a- reductase (SRD5As)					model_5	Early motor skills
ratio_5a_reductase_GA_adj	-0.722304	0.873758	472.168	-0.826664	0.408845	mental	500	914	-2.41596	0.969471	phase I ratio	5a- reductase (SRD5As)					model_5	Early mental skills
ratio_5a_reductase_GA_adj	-0.967293	1.55754	373.673	-0.621041	0.534951	percentile_correct_raven	390	655	-3.97082	2.04685	phase I ratio	5a- reductase (SRD5As)					model_5	Fluid intelligence
ratio_5a_reductase_GA_adj	-0.0198956	0.0654557	412.759	-0.303955	0.761315	ADHD_scaled	429	1170	-0.14654	0.106677	phase I ratio	5a- reductase (SRD5As)					model_5	ADHD
ratio_5a_reductase_GA_adj	-0.135466	0.071685	376.962	-1.88974	0.0595596	Gen_Tot_scaled	393	669	-0.274074	0.00287562	phase I ratio	5a- reductase (SRD5As)					model_5	Total scale
ratio_5a_reductase_GA_adj	-0.130069	0.0708023	377.341	-1.83708	0.0669847	Gen_Ext_scaled	393	669	-0.266871	0.00665181	phase I ratio	5a- reductase (SRD5As)					model_5	Externalizing scale
ratio_5a_reductase_GA_adj	-0.148074	0.0714169	379.214	-2.07337	0.0388121	Gen_Int_scaled	393	669	-0.286179	-0.0102505	phase I ratio	5a- reductase (SRD5As)					model_5	Internalizing scale
ratio_5b_reductase_3a_hsd_GA_adj	-12.9862	3.70476	1416	-3.50528	0.000470355	hitrtse	436	1430	-20.2167	-5.75581	phase I ratio	5b-reductase + 3a- hydroxysteroid dehydrogenase					model_5	Hit reaction time SE
ratio_5b_reductase_3a_hsd_GA_adj	1.30949	0.616926	484.001	2.12261	0.0342936	motor	500	914	0.11236	2.50309	phase I ratio	5b-reductase + 3a- hydroxysteroid dehydrogenase					model_5	Early motor skills
ratio_5b_reductase_3a_hsd_GA_adj	2.07381	0.623704	484.713	3.32498	0.000951283	mental	500	914	0.866184	3.28307	phase I ratio	5b-reductase + 3a- hydroxysteroid dehydrogenase					model_5	Early mental skills
ratio_5b_reductase_3a_hsd_GA_adj	0.924174	1.1731	371.602	0.787807	0.431312	percentile_correct_raven	390	655	-1.34082	3.19058	phase I ratio	5b-reductase + 3a- hydroxysteroid dehydrogenase					model_5	Fluid intelligence
ratio_5b_reductase_3a_hsd_GA_adj	-0.0369406	0.0489637	418.801	-0.754447	0.451005	ADHD_scaled	429	1170	-0.131689	0.057744	phase I ratio	5b-reductase + 3a- hydroxysteroid dehydrogenase					model_5	ADHD
ratio_5b_reductase_3a_hsd_GA_adj	-0.0176061	0.0541349	369.742	-0.325225	0.745194	Gen_Tot_scaled	393	669	-0.122127	0.0869892	phase I ratio	5b-reductase + 3a- hydroxysteroid dehydrogenase					model_5	Total scale
ratio_5b_reductase_3a_hsd_GA_adj	-0.0423829	0.0533042	367.85	-0.795113	0.42706	Gen_Ext_scaled	393	669	-0.145368	0.0605262	phase I ratio	5b-reductase + 3a- hydroxysteroid dehydrogenase					model_5	Externalizing scale
ratio_5b_reductase_3a_hsd_GA_adj	0.0421547	0.0538379	369.905	0.782993	0.434132	Gen_Int_scaled	393	669	-0.0617339	0.146247	phase I ratio	5b-reductase + 3a- hydroxysteroid dehydrogenase					model_5	Internalizing scale
ratio_d4_17_20_lyase_GA_adj	4.8624	3.35482	1416	1.44937	0.147454	hitrtse	436	1430	-1.68507	11.4099	phase I ratio	∆4 17,20 lyase (CYP17A1)					model_5	Hit reaction time SE
ratio_d4_17_20_lyase_GA_adj	0.664575	0.566114	463.932	1.17392	0.241028	motor	500	914	-0.430753	1.76249	phase I ratio	∆4 17,20 lyase (CYP17A1)					model_5	Early motor skills
ratio_d4_17_20_lyase_GA_adj	0.883703	0.577782	467.718	1.52947	0.126823	mental	500	914	-0.234256	2.00444	phase I ratio	∆4 17,20 lyase (CYP17A1)					model_5	Early mental skills
ratio_d4_17_20_lyase_GA_adj	-0.861341	1.02951	363.076	-0.836655	0.403337	percentile_correct_raven	390	655	-2.8555	1.12225	phase I ratio	∆4 17,20 lyase (CYP17A1)					model_5	Fluid intelligence
ratio_d4_17_20_lyase_GA_adj	-0.0435673	0.0433668	418.475	-1.00462	0.315659	ADHD_scaled	429	1170	-0.127448	0.0403299	phase I ratio	∆4 17,20 lyase (CYP17A1)					model_5	ADHD
ratio_d4_17_20_lyase_GA_adj	-0.00308817	0.0477444	368.313	-0.0646813	0.948463	Gen_Tot_scaled	393	669	-0.0951885	0.0892543	phase I ratio	∆4 17,20 lyase (CYP17A1)					model_5	Total scale
ratio_d4_17_20_lyase_GA_adj	0.0148606	0.0470229	366.019	0.316029	0.75216	Gen_Ext_scaled	393	669	-0.0758264	0.105822	phase I ratio	∆4 17,20 lyase (CYP17A1)					model_5	Externalizing scale
ratio_d4_17_20_lyase_GA_adj	-0.0384425	0.0474771	368.638	-0.809706	0.418631	Gen_Int_scaled	393	669	-0.130049	0.0533596	phase I ratio	∆4 17,20 lyase (CYP17A1)					model_5	Internalizing scale
ratio_global_17_20_lyase_GA_adj	5.03402	3.46482	1416	1.45289	0.146475	hitrtse	436	1430	-1.72813	11.7962	phase I ratio	17,20 lyase					model_5	Hit reaction time SE
ratio_global_17_20_lyase_GA_adj	0.601015	0.584882	465.128	1.02758	0.30468	motor	500	914	-0.530828	1.73511	phase I ratio	17,20 lyase					model_5	Early motor skills
ratio_global_17_20_lyase_GA_adj	0.855892	0.596828	468.841	1.43407	0.15222	mental	500	914	-0.299165	2.01329	phase I ratio	17,20 lyase					model_5	Early mental skills
ratio_global_17_20_lyase_GA_adj	-0.827606	1.05897	363.17	-0.78152	0.435006	percentile_correct_raven	390	655	-2.87942	1.21245	phase I ratio	17,20 lyase					model_5	Fluid intelligence
ratio_global_17_20_lyase_GA_adj	-0.0490965	0.0447803	418.209	-1.09639	0.27354	ADHD_scaled	429	1170	-0.135714	0.0375322	phase I ratio	17,20 lyase					model_5	ADHD
ratio_global_17_20_lyase_GA_adj	-0.00221001	0.049187	368.949	-0.0449307	0.964187	Gen_Tot_scaled	393	669	-0.0971132	0.0928987	phase I ratio	17,20 lyase					model_5	Total scale
ratio_global_17_20_lyase_GA_adj	0.0187467	0.0484475	366.801	0.386949	0.699018	Gen_Ext_scaled	393	669	-0.0747098	0.112437	phase I ratio	17,20 lyase					model_5	Externalizing scale
ratio_global_17_20_lyase_GA_adj	-0.0381861	0.0489194	369.352	-0.780593	0.435542	Gen_Int_scaled	393	669	-0.1326	0.0563768	phase I ratio	17,20 lyase					model_5	Internalizing scale
ratio_global_17a_hydroxylase_GA_adj	-5.3318	4.95873	1416	-1.07524	0.282452	hitrtse	436	1430	-15.0095	4.34593	phase I ratio	17a-hydroxylase					model_5	Hit reaction time SE
ratio_global_17a_hydroxylase_GA_adj	0.0267304	0.823914	489.822	0.0324432	0.974132	motor	500	914	-1.56815	1.62464	phase I ratio	17a-hydroxylase					model_5	Early motor skills
ratio_global_17a_hydroxylase_GA_adj	0.575529	0.838315	491.414	0.686531	0.492702	mental	500	914	-1.04862	2.20007	phase I ratio	17a-hydroxylase					model_5	Early mental skills
ratio_global_17a_hydroxylase_GA_adj	0.378971	1.529	377.112	0.247856	0.804381	percentile_correct_raven	390	655	-2.57325	3.33346	phase I ratio	17a-hydroxylase					model_5	Fluid intelligence
ratio_global_17a_hydroxylase_GA_adj	-0.0161261	0.0644495	415.655	-0.250213	0.802546	ADHD_scaled	429	1170	-0.14085	0.108485	phase I ratio	17a-hydroxylase					model_5	ADHD
ratio_global_17a_hydroxylase_GA_adj	-0.0200381	0.0705893	379.728	-0.283868	0.776666	Gen_Tot_scaled	393	669	-0.156351	0.116369	phase I ratio	17a-hydroxylase					model_5	Total scale
ratio_global_17a_hydroxylase_GA_adj	-0.0417259	0.0696794	380.005	-0.598827	0.549645	Gen_Ext_scaled	393	669	-0.176391	0.0928085	phase I ratio	17a-hydroxylase					model_5	Externalizing scale
ratio_global_17a_hydroxylase_GA_adj	0.00855493	0.0704315	382.42	0.121465	0.903387	Gen_Int_scaled	393	669	-0.127417	0.144713	phase I ratio	17a-hydroxylase					model_5	Internalizing scale
ratio_global_21_hydroxylase_GA_adj	-0.1151	4.41337	1416	-0.0260798	0.979197	hitrtse	436	1430	-8.72849	8.49829	phase I ratio	21-hydroxylase					model_5	Hit reaction time SE
ratio_global_21_hydroxylase_GA_adj	0.0955831	0.711961	512.031	0.134253	0.893255	motor	500	914	-1.28418	1.47525	phase I ratio	21-hydroxylase					model_5	Early motor skills
ratio_global_21_hydroxylase_GA_adj	0.511845	0.722029	510.977	0.708898	0.478711	mental	500	914	-0.885658	1.9132	phase I ratio	21-hydroxylase					model_5	Early mental skills
ratio_global_21_hydroxylase_GA_adj	-2.12915	1.29264	361.332	-1.64713	0.1004	percentile_correct_raven	390	655	-4.63452	0.360475	phase I ratio	21-hydroxylase					model_5	Fluid intelligence
ratio_global_21_hydroxylase_GA_adj	-0.0729665	0.0560671	419.416	-1.30141	0.193831	ADHD_scaled	429	1170	-0.181412	0.0355045	phase I ratio	21-hydroxylase					model_5	ADHD
ratio_global_21_hydroxylase_GA_adj	-0.0507832	0.0609523	385.19	-0.833163	0.405269	Gen_Tot_scaled	393	669	-0.168565	0.0669411	phase I ratio	21-hydroxylase					model_5	Total scale
ratio_global_21_hydroxylase_GA_adj	-0.07131	0.0602011	386.723	-1.18453	0.236931	Gen_Ext_scaled	393	669	-0.187697	0.0449104	phase I ratio	21-hydroxylase					model_5	Externalizing scale
ratio_global_21_hydroxylase_GA_adj	-0.0123135	0.060944	389.368	-0.202046	0.839987	Gen_Int_scaled	393	669	-0.130122	0.105373	phase I ratio	21-hydroxylase					model_5	Internalizing scale
ratio_global_3b_hsd_GA_adj	5.22434	7.52098	1416	0.694635	0.487398	hitrtse	436	1430	-9.45403	19.9027	phase I ratio	3b-HSD					model_5	Hit reaction time SE
ratio_global_3b_hsd_GA_adj	-2.24262	1.26753	465.417	-1.76928	0.0775018	motor	500	914	-4.69429	0.216841	phase I ratio	3b-HSD					model_5	Early motor skills
ratio_global_3b_hsd_GA_adj	0.00997787	1.29853	468.765	0.00768399	0.993872	mental	500	914	-2.5039	2.52721	phase I ratio	3b-HSD					model_5	Early mental skills
ratio_global_3b_hsd_GA_adj	1.63968	2.35058	366.992	0.697566	0.48589	percentile_correct_raven	390	655	-2.90373	6.17568	phase I ratio	3b-HSD					model_5	Fluid intelligence
ratio_global_3b_hsd_GA_adj	-0.0863806	0.0987897	414.672	-0.874389	0.382413	ADHD_scaled	429	1170	-0.277538	0.104642	phase I ratio	3b-HSD					model_5	ADHD
ratio_global_3b_hsd_GA_adj	-0.0287334	0.108066	373.324	-0.265888	0.790473	Gen_Tot_scaled	393	669	-0.237696	0.179794	phase I ratio	3b-HSD					model_5	Total scale
ratio_global_3b_hsd_GA_adj	0.0166381	0.106596	372.483	0.156086	0.87605	Gen_Ext_scaled	393	669	-0.18934	0.222433	phase I ratio	3b-HSD					model_5	Externalizing scale
ratio_global_3b_hsd_GA_adj	-0.079456	0.107564	374.188	-0.738689	0.460559	Gen_Int_scaled	393	669	-0.287687	0.127938	phase I ratio	3b-HSD					model_5	Internalizing scale
ratio_global_androgen_progestogen_GA_adj	3.6105	4.14331	1416	0.871404	0.383681	hitrtse	436	1430	-4.47583	11.6968	phase I ratio	androgens/progestogens ratio					model_5	Hit reaction time SE
ratio_global_androgen_progestogen_GA_adj	0.694748	0.670414	496.257	1.0363	0.300568	motor	500	914	-0.603234	1.99485	phase I ratio	androgens/progestogens ratio					model_5	Early motor skills
ratio_global_androgen_progestogen_GA_adj	1.3065	0.680108	497.248	1.92102	0.0553012	mental	500	914	-0.0110764	2.62467	phase I ratio	androgens/progestogens ratio					model_5	Early mental skills
ratio_global_androgen_progestogen_GA_adj	-0.255022	1.23178	365.589	-0.207034	0.836098	percentile_correct_raven	390	655	-2.63949	2.11935	phase I ratio	androgens/progestogens ratio					model_5	Fluid intelligence
ratio_global_androgen_progestogen_GA_adj	-0.0330952	0.0531186	418.984	-0.623044	0.533595	ADHD_scaled	429	1170	-0.135835	0.0696727	phase I ratio	androgens/progestogens ratio					model_5	ADHD
ratio_global_androgen_progestogen_GA_adj	-0.0356887	0.0575595	383.123	-0.620032	0.535605	Gen_Tot_scaled	393	669	-0.146869	0.0755216	phase I ratio	androgens/progestogens ratio					model_5	Total scale
ratio_global_androgen_progestogen_GA_adj	-0.0271179	0.0568928	384.21	-0.476649	0.633883	Gen_Ext_scaled	393	669	-0.137062	0.0827505	phase I ratio	androgens/progestogens ratio					model_5	Externalizing scale
ratio_global_androgen_progestogen_GA_adj	-0.0337163	0.0574766	386.706	-0.58661	0.557808	Gen_Int_scaled	393	669	-0.144739	0.0773461	phase I ratio	androgens/progestogens ratio					model_5	Internalizing scale
ratio_global_aromatase_GA_adj	-2.97429	2.51884	1416	-1.18082	0.237873	hitrtse	436	1430	-7.89021	1.94162	phase I ratio	aromatase					model_5	Hit reaction time SE
ratio_global_aromatase_GA_adj	0.305576	0.418212	485.762	0.730673	0.465331	motor	500	914	-0.505425	1.11514	phase I ratio	aromatase					model_5	Early motor skills
ratio_global_aromatase_GA_adj	0.261868	0.425979	487.423	0.614743	0.539011	mental	500	914	-0.563213	1.08751	phase I ratio	aromatase					model_5	Early mental skills
ratio_global_aromatase_GA_adj	1.46355	0.763105	375.811	1.91789	0.0558831	percentile_correct_raven	390	655	-0.00682455	2.94227	phase I ratio	aromatase					model_5	Fluid intelligence
ratio_global_aromatase_GA_adj	0.0259374	0.0324372	417.192	0.799619	0.424386	ADHD_scaled	429	1170	-0.0368017	0.0886896	phase I ratio	aromatase					model_5	ADHD
ratio_global_aromatase_GA_adj	0.0664259	0.0352313	377.758	1.88542	0.0601398	Gen_Tot_scaled	393	669	-0.00154838	0.134571	phase I ratio	aromatase					model_5	Total scale
ratio_global_aromatase_GA_adj	0.0884633	0.0346454	377.72	2.55339	0.0110602	Gen_Ext_scaled	393	669	0.0216182	0.155469	phase I ratio	aromatase					model_5	Externalizing scale
ratio_global_aromatase_GA_adj	0.0384338	0.0352627	380.735	1.08993	0.276435	Gen_Int_scaled	393	669	-0.0296234	0.106622	phase I ratio	aromatase					model_5	Internalizing scale
ratio_global_cyp17_GA_adj	3.02591	3.59657	1416	0.841331	0.400305	hitrtse	436	1430	-3.99337	10.0452	phase I ratio	CYP17					model_5	Hit reaction time SE
ratio_global_cyp17_GA_adj	0.451825	0.585874	492.767	0.771198	0.440959	motor	500	914	-0.683218	1.58709	phase I ratio	CYP17					model_5	Early motor skills
ratio_global_cyp17_GA_adj	0.922066	0.595174	494.223	1.54924	0.121965	mental	500	914	-0.231694	2.07485	phase I ratio	CYP17					model_5	Early mental skills
ratio_global_cyp17_GA_adj	-0.884832	1.07061	363.208	-0.826476	0.409077	percentile_correct_raven	390	655	-2.95782	1.1784	phase I ratio	CYP17					model_5	Fluid intelligence
ratio_global_cyp17_GA_adj	-0.0206574	0.046274	418.1	-0.446415	0.655528	ADHD_scaled	429	1170	-0.110148	0.0688773	phase I ratio	CYP17					model_5	ADHD
ratio_global_cyp17_GA_adj	-0.0670634	0.0499467	380.437	-1.3427	0.180171	Gen_Tot_scaled	393	669	-0.163633	0.0293422	phase I ratio	CYP17					model_5	Total scale
ratio_global_cyp17_GA_adj	-0.0706005	0.0493097	380.778	-1.43178	0.153028	Gen_Ext_scaled	393	669	-0.166007	0.0245169	phase I ratio	CYP17					model_5	Externalizing scale
ratio_global_cyp17_GA_adj	-0.0508586	0.0499008	383.623	-1.01919	0.308753	Gen_Int_scaled	393	669	-0.147334	0.0454738	phase I ratio	CYP17					model_5	Internalizing scale
ratio_p450_aromatase_GA_adj	0.664675	2.3695	1416	0.280513	0.779125	hitrtse	436	1430	-3.95977	5.28912	phase I ratio	P450 aromatase					model_5	Hit reaction time SE
ratio_p450_aromatase_GA_adj	0.369513	0.390121	475.626	0.947175	0.344031	motor	500	914	-0.386468	1.12503	phase I ratio	P450 aromatase					model_5	Early motor skills
ratio_p450_aromatase_GA_adj	0.293985	0.398002	478.289	0.738653	0.46048	mental	500	914	-0.476311	1.06594	phase I ratio	P450 aromatase					model_5	Early mental skills
ratio_p450_aromatase_GA_adj	-0.0102684	0.728044	375.958	-0.0141042	0.988754	percentile_correct_raven	390	655	-1.41606	1.3964	phase I ratio	P450 aromatase					model_5	Fluid intelligence
ratio_p450_aromatase_GA_adj	-0.0169582	0.0303549	415.341	-0.558664	0.576692	ADHD_scaled	429	1170	-0.0756433	0.0417904	phase I ratio	P450 aromatase					model_5	ADHD
ratio_p450_aromatase_GA_adj	-0.0122487	0.0334635	381.161	-0.36603	0.714545	Gen_Tot_scaled	393	669	-0.07696	0.0523343	phase I ratio	P450 aromatase					model_5	Total scale
ratio_p450_aromatase_GA_adj	-0.0230937	0.033035	381.522	-0.699066	0.484937	Gen_Ext_scaled	393	669	-0.0870478	0.0406072	phase I ratio	P450 aromatase					model_5	Externalizing scale
ratio_p450_aromatase_GA_adj	-0.0155662	0.0333962	384.285	-0.466107	0.641403	Gen_Int_scaled	393	669	-0.0801278	0.0489104	phase I ratio	P450 aromatase					model_5	Internalizing scale
ratio_SG_androgens_GA_adj	-1.92594	3.21438	1416	-0.599163	0.54916	hitrtse	436	1430	-8.19931	4.34743	SG ratio	SG ratio Androgens					model_5	Hit reaction time SE
ratio_SG_androgens_GA_adj	0.909689	0.540585	471.004	1.68279	0.093079	motor	500	914	-0.137135	1.95721	SG ratio	SG ratio Androgens					model_5	Early motor skills
ratio_SG_androgens_GA_adj	0.357269	0.553199	474.501	0.645825	0.518705	mental	500	914	-0.713548	1.42996	SG ratio	SG ratio Androgens					model_5	Early mental skills
ratio_SG_androgens_GA_adj	1.85105	0.980663	377.14	1.88755	0.0598542	percentile_correct_raven	390	655	-0.0404239	3.74841	SG ratio	SG ratio Androgens					model_5	Fluid intelligence
ratio_SG_androgens_GA_adj	-0.01468	0.0414217	418.133	-0.354403	0.723216	ADHD_scaled	429	1170	-0.094813	0.0654391	SG ratio	SG ratio Androgens					model_5	ADHD
ratio_SG_androgens_GA_adj	0.0902758	0.0449717	372.454	2.00739	0.0454302	Gen_Tot_scaled	393	669	0.00356606	0.177324	SG ratio	SG ratio Androgens					model_5	Total scale
ratio_SG_androgens_GA_adj	0.113779	0.0442026	371.453	2.57404	0.0104387	Gen_Ext_scaled	393	669	0.028535	0.199302	SG ratio	SG ratio Androgens					model_5	Externalizing scale
ratio_SG_androgens_GA_adj	0.0612109	0.0449482	374.221	1.36181	0.174077	Gen_Int_scaled	393	669	-0.0254371	0.148251	SG ratio	SG ratio Androgens					model_5	Internalizing scale
ratio_SG_corticosteroids_GA_adj	9.95052	3.85631	1416	2.58032	0.00997078	hitrtse	436	1430	2.42433	17.4767	SG ratio	SG ratio Corticosteroids					model_5	Hit reaction time SE
ratio_SG_corticosteroids_GA_adj	0.396685	0.638423	467.068	0.621351	0.534672	motor	500	914	-0.838986	1.63439	SG ratio	SG ratio Corticosteroids					model_5	Early motor skills
ratio_SG_corticosteroids_GA_adj	-0.0225337	0.652387	470.95	-0.0345403	0.972461	mental	500	914	-1.28819	1.23971	SG ratio	SG ratio Corticosteroids					model_5	Early mental skills
ratio_SG_corticosteroids_GA_adj	1.42137	1.18675	376.521	1.1977	0.231788	percentile_correct_raven	390	655	-0.873469	3.71133	SG ratio	SG ratio Corticosteroids					model_5	Fluid intelligence
ratio_SG_corticosteroids_GA_adj	0.0144384	0.0496653	419.683	0.290713	0.771414	ADHD_scaled	429	1170	-0.081672	0.110478	SG ratio	SG ratio Corticosteroids					model_5	ADHD
ratio_SG_corticosteroids_GA_adj	0.025673	0.0549632	381.621	0.467093	0.6407	Gen_Tot_scaled	393	669	-0.0804033	0.131962	SG ratio	SG ratio Corticosteroids					model_5	Total scale
ratio_SG_corticosteroids_GA_adj	0.0800099	0.0541427	381.989	1.47776	0.140296	Gen_Ext_scaled	393	669	-0.0244332	0.184768	SG ratio	SG ratio Corticosteroids					model_5	Externalizing scale
ratio_SG_corticosteroids_GA_adj	-0.0232377	0.0548811	385.218	-0.423418	0.672226	Gen_Int_scaled	393	669	-0.129128	0.0829455	SG ratio	SG ratio Corticosteroids					model_5	Internalizing scale
ratio_SG_cortisol_GA_adj	3.05793	3.54949	1416	0.861513	0.389102	hitrtse	436	1430	-3.86946	9.98533	SG ratio	SG ratio Cortisol					model_5	Hit reaction time SE
ratio_SG_cortisol_GA_adj	0.301908	0.599553	457.998	0.503555	0.614816	motor	500	914	-0.857539	1.46532	SG ratio	SG ratio Cortisol					model_5	Early motor skills
ratio_SG_cortisol_GA_adj	-0.216509	0.613375	462.837	-0.35298	0.724264	mental	500	914	-1.40496	0.971347	SG ratio	SG ratio Cortisol					model_5	Early mental skills
ratio_SG_cortisol_GA_adj	1.72509	1.10074	381.271	1.56721	0.117894	percentile_correct_raven	390	655	-0.399919	3.85267	SG ratio	SG ratio Cortisol					model_5	Fluid intelligence
ratio_SG_cortisol_GA_adj	0.0114656	0.0460477	418.664	0.248995	0.803487	ADHD_scaled	429	1170	-0.0776482	0.100503	SG ratio	SG ratio Cortisol					model_5	ADHD
ratio_SG_cortisol_GA_adj	0.0170032	0.0510921	386.822	0.332796	0.739469	Gen_Tot_scaled	393	669	-0.0816711	0.115744	SG ratio	SG ratio Cortisol					model_5	Total scale
ratio_SG_cortisol_GA_adj	0.0670939	0.0504153	388.716	1.33082	0.184028	Gen_Ext_scaled	393	669	-0.0302347	0.164569	SG ratio	SG ratio Cortisol					model_5	Externalizing scale
ratio_SG_cortisol_GA_adj	-0.0257459	0.0510569	391.558	-0.504259	0.614363	Gen_Int_scaled	393	669	-0.12431	0.0729934	SG ratio	SG ratio Cortisol					model_5	Internalizing scale
ratio_SG_estradiol_GA_adj	-0.280081	1.88499	1416	-0.148585	0.881902	hitrtse	436	1430	-3.95893	3.39876	SG ratio	SG ratio Estradiol					model_5	Hit reaction time SE
ratio_SG_estradiol_GA_adj	-0.04557	0.317401	472.845	-0.143572	0.885899	motor	500	914	-0.661272	0.568544	SG ratio	SG ratio Estradiol					model_5	Early motor skills
ratio_SG_estradiol_GA_adj	-0.0227851	0.32392	476.292	-0.0703418	0.943951	mental	500	914	-0.650007	0.605094	SG ratio	SG ratio Estradiol					model_5	Early mental skills
ratio_SG_estradiol_GA_adj	0.490867	0.580582	370.409	0.845474	0.398392	percentile_correct_raven	390	655	-0.627945	1.61547	SG ratio	SG ratio Estradiol					model_5	Fluid intelligence
ratio_SG_estradiol_GA_adj	0.0305898	0.0245276	416.451	1.24716	0.213039	ADHD_scaled	429	1170	-0.0168514	0.0780387	SG ratio	SG ratio Estradiol					model_5	ADHD
ratio_SG_estradiol_GA_adj	0.0420353	0.02677	373.829	1.57024	0.117206	Gen_Tot_scaled	393	669	-0.00964328	0.0937729	SG ratio	SG ratio Estradiol					model_5	Total scale
ratio_SG_estradiol_GA_adj	0.041996	0.0264072	373.177	1.59033	0.112608	Gen_Ext_scaled	393	669	-0.00899697	0.0930123	SG ratio	SG ratio Estradiol					model_5	Externalizing scale
ratio_SG_estradiol_GA_adj	0.0266113	0.0267277	375.337	0.995644	0.320065	Gen_Int_scaled	393	669	-0.0249732	0.078286	SG ratio	SG ratio Estradiol					model_5	Internalizing scale
ratio_SG_estriol_GA_adj	-0.506568	2.94071	1416	-0.17226	0.863257	hitrtse	436	1430	-6.24582	5.23269	SG ratio	SG ratio Estriol					model_5	Hit reaction time SE
ratio_SG_estriol_GA_adj	0.202071	0.486046	485.015	0.415744	0.677781	motor	500	914	-0.741799	1.14198	SG ratio	SG ratio Estriol					model_5	Early motor skills
ratio_SG_estriol_GA_adj	0.0148338	0.495126	487.063	0.0299597	0.976111	mental	500	914	-0.946014	0.972874	SG ratio	SG ratio Estriol					model_5	Early mental skills
ratio_SG_estriol_GA_adj	2.01492	0.916402	383.439	2.19873	0.0284937	percentile_correct_raven	390	655	0.24704	3.78787	SG ratio	SG ratio Estriol					model_5	Fluid intelligence
ratio_SG_estriol_GA_adj	-0.0142158	0.0386981	413.218	-0.36735	0.713546	ADHD_scaled	429	1170	-0.0890235	0.0606836	SG ratio	SG ratio Estriol					model_5	ADHD
ratio_SG_estriol_GA_adj	0.0141341	0.042364	379.688	0.333634	0.73884	Gen_Tot_scaled	393	669	-0.067618	0.0960629	SG ratio	SG ratio Estriol					model_5	Total scale
ratio_SG_estriol_GA_adj	0.0340324	0.0417981	379.86	0.814209	0.416036	Gen_Ext_scaled	393	669	-0.0465832	0.114921	SG ratio	SG ratio Estriol					model_5	Externalizing scale
ratio_SG_estriol_GA_adj	0.00651172	0.0422759	382.627	0.154029	0.877668	Gen_Int_scaled	393	669	-0.0750755	0.0882749	SG ratio	SG ratio Estriol					model_5	Internalizing scale
ratio_SG_estrogens_GA_adj	-1.28778	2.18332	1416	-0.589827	0.555401	hitrtse	436	1430	-5.54887	2.97331	SG ratio	SG ratio Estrogens					model_5	Hit reaction time SE
ratio_SG_estrogens_GA_adj	0.227482	0.368087	477.275	0.618012	0.536862	motor	500	914	-0.487401	0.939148	SG ratio	SG ratio Estrogens					model_5	Early motor skills
ratio_SG_estrogens_GA_adj	0.0700114	0.375423	480.034	0.186487	0.852142	mental	500	914	-0.657901	0.796839	SG ratio	SG ratio Estrogens					model_5	Early mental skills
ratio_SG_estrogens_GA_adj	0.924951	0.67287	371.055	1.37464	0.170074	percentile_correct_raven	390	655	-0.372215	2.22747	SG ratio	SG ratio Estrogens					model_5	Fluid intelligence
ratio_SG_estrogens_GA_adj	0.0189984	0.0286082	413.999	0.66409	0.507003	ADHD_scaled	429	1170	-0.0363251	0.0743482	SG ratio	SG ratio Estrogens					model_5	ADHD
ratio_SG_estrogens_GA_adj	0.0212438	0.0311193	374.365	0.682657	0.495246	Gen_Tot_scaled	393	669	-0.0388274	0.0813927	SG ratio	SG ratio Estrogens					model_5	Total scale
ratio_SG_estrogens_GA_adj	0.0366183	0.0306575	373.564	1.19443	0.233067	Gen_Ext_scaled	393	669	-0.0225638	0.0958666	SG ratio	SG ratio Estrogens					model_5	Externalizing scale
ratio_SG_estrogens_GA_adj	0.00736211	0.0310304	376.035	0.237255	0.812588	Gen_Int_scaled	393	669	-0.0525348	0.0673478	SG ratio	SG ratio Estrogens					model_5	Internalizing scale
ratio_SG_progesterone_GA_adj	-1.62348	2.62186	1416	-0.619209	0.535878	hitrtse	436	1430	-6.74044	3.49349	SG ratio	SG ratio Progesterone					model_5	Hit reaction time SE
ratio_SG_progesterone_GA_adj	0.132718	0.441091	475.343	0.300886	0.763633	motor	500	914	-0.72178	0.98718	SG ratio	SG ratio Progesterone					model_5	Early motor skills
ratio_SG_progesterone_GA_adj	0.0519519	0.449984	478.393	0.115453	0.908135	mental	500	914	-0.818989	0.92469	SG ratio	SG ratio Progesterone					model_5	Early mental skills
ratio_SG_progesterone_GA_adj	1.25687	0.792599	367.359	1.58575	0.113655	percentile_correct_raven	390	655	-0.273716	2.78769	SG ratio	SG ratio Progesterone					model_5	Fluid intelligence
ratio_SG_progesterone_GA_adj	-0.0195288	0.0339583	412.782	-0.575081	0.56555	ADHD_scaled	429	1170	-0.0852319	0.0461366	SG ratio	SG ratio Progesterone					model_5	ADHD
ratio_SG_progesterone_GA_adj	0.0521489	0.0365809	369.756	1.42558	0.154834	Gen_Tot_scaled	393	669	-0.018527	0.12278	SG ratio	SG ratio Progesterone					model_5	Total scale
ratio_SG_progesterone_GA_adj	0.0593312	0.036027	368.39	1.64685	0.100441	Gen_Ext_scaled	393	669	-0.0103259	0.128843	SG ratio	SG ratio Progesterone					model_5	Externalizing scale
ratio_SG_progesterone_GA_adj	0.0483258	0.0364232	370.169	1.32679	0.185397	Gen_Int_scaled	393	669	-0.0220277	0.118672	SG ratio	SG ratio Progesterone					model_5	Internalizing scale
ratio_SG_progestogens_GA_adj	-2.90357	2.95735	1416	-0.981814	0.326359	hitrtse	436	1430	-8.67531	2.86817	SG ratio	SG ratio Progestogens					model_5	Hit reaction time SE
ratio_SG_progestogens_GA_adj	0.237666	0.500149	477.224	0.47519	0.634869	motor	500	914	-0.731458	1.20636	SG ratio	SG ratio Progestogens					model_5	Early motor skills
ratio_SG_progestogens_GA_adj	0.0961574	0.510147	480.084	0.18849	0.850573	mental	500	914	-0.891775	1.08497	SG ratio	SG ratio Progestogens					model_5	Early mental skills
ratio_SG_progestogens_GA_adj	1.25828	0.899385	371.583	1.39905	0.162633	percentile_correct_raven	390	655	-0.477828	2.99631	SG ratio	SG ratio Progestogens					model_5	Fluid intelligence
ratio_SG_progestogens_GA_adj	-0.00967694	0.038552	413.221	-0.25101	0.801931	ADHD_scaled	429	1170	-0.0842735	0.064867	SG ratio	SG ratio Progestogens					model_5	ADHD
ratio_SG_progestogens_GA_adj	0.0631024	0.041376	370.741	1.5251	0.128088	Gen_Tot_scaled	393	669	-0.0167911	0.14304	SG ratio	SG ratio Progestogens					model_5	Total scale
ratio_SG_progestogens_GA_adj	0.0677837	0.0407708	369.579	1.66256	0.0972493	Gen_Ext_scaled	393	669	-0.0109841	0.146503	SG ratio	SG ratio Progestogens					model_5	Externalizing scale
ratio_SG_progestogens_GA_adj	0.0584714	0.0412118	371.44	1.4188	0.156796	Gen_Int_scaled	393	669	-0.0210821	0.138121	SG ratio	SG ratio Progestogens					model_5	Internalizing scale
ratio_SG_testosterone_GA_adj	-1.72925	3.35623	1416	-0.515237	0.606468	hitrtse	436	1430	-8.27947	4.82096	SG ratio	SG ratio Testosterone					model_5	Hit reaction time SE
ratio_SG_testosterone_GA_adj	0.635287	0.569581	465.914	1.11536	0.265272	motor	500	914	-0.469453	1.73731	SG ratio	SG ratio Testosterone					model_5	Early motor skills
ratio_SG_testosterone_GA_adj	0.226749	0.582352	469.509	0.389367	0.697181	mental	500	914	-0.901064	1.35521	SG ratio	SG ratio Testosterone					model_5	Early mental skills
ratio_SG_testosterone_GA_adj	2.36778	1.02406	379.144	2.31215	0.0213046	percentile_correct_raven	390	655	0.391031	4.34727	SG ratio	SG ratio Testosterone					model_5	Fluid intelligence
ratio_SG_testosterone_GA_adj	-0.0335908	0.0433696	412.831	-0.774523	0.439065	ADHD_scaled	429	1170	-0.117509	0.0502678	SG ratio	SG ratio Testosterone					model_5	ADHD
ratio_SG_testosterone_GA_adj	0.0644732	0.047116	375.067	1.36839	0.172009	Gen_Tot_scaled	393	669	-0.02648	0.15554	SG ratio	SG ratio Testosterone					model_5	Total scale
ratio_SG_testosterone_GA_adj	0.107975	0.0462682	374.477	2.33367	0.0201416	Gen_Ext_scaled	393	669	0.0186415	0.197377	SG ratio	SG ratio Testosterone					model_5	Externalizing scale
ratio_SG_testosterone_GA_adj	0.0380275	0.0470443	377.061	0.808334	0.419408	Gen_Int_scaled	393	669	-0.0528079	0.128942	SG ratio	SG ratio Testosterone					model_5	Internalizing scale
sum_17_hydroxy_progesterone_SG_GA_adj	-3.46221	4.01806	1416	-0.861662	0.389019	hitrtse	436	1430	-11.3041	4.37967	hormone sum	Total 17-hydroxy-progesterone				Progestogen	model_5	Hit reaction time SE
sum_17_hydroxy_progesterone_SG_GA_adj	-0.0376148	0.691464	466.489	-0.0543988	0.956641	motor	500	914	-1.37827	1.30061	hormone sum	Total 17-hydroxy-progesterone				Progestogen	model_5	Early motor skills
sum_17_hydroxy_progesterone_SG_GA_adj	0.458518	0.706164	470.615	0.649308	0.516456	mental	500	914	-0.911842	1.82456	hormone sum	Total 17-hydroxy-progesterone				Progestogen	model_5	Early mental skills
sum_17_hydroxy_progesterone_SG_GA_adj	-0.158673	1.24901	380.595	-0.127039	0.898977	percentile_correct_raven	390	655	-2.56782	2.25818	hormone sum	Total 17-hydroxy-progesterone				Progestogen	model_5	Fluid intelligence
sum_17_hydroxy_progesterone_SG_GA_adj	0.00688296	0.0524758	413.945	0.131165	0.895709	ADHD_scaled	429	1170	-0.0946626	0.108345	hormone sum	Total 17-hydroxy-progesterone				Progestogen	model_5	ADHD
sum_17_hydroxy_progesterone_SG_GA_adj	-0.0157083	0.05765	381.311	-0.272477	0.785403	Gen_Tot_scaled	393	669	-0.127122	0.0956134	hormone sum	Total 17-hydroxy-progesterone				Progestogen	model_5	Total scale
sum_17_hydroxy_progesterone_SG_GA_adj	-0.0350346	0.0569304	382.152	-0.615394	0.538661	Gen_Ext_scaled	393	669	-0.145033	0.0749172	hormone sum	Total 17-hydroxy-progesterone				Progestogen	model_5	Externalizing scale
sum_17_hydroxy_progesterone_SG_GA_adj	-0.016556	0.0575377	384.472	-0.287741	0.7737	Gen_Int_scaled	393	669	-0.127837	0.0944894	hormone sum	Total 17-hydroxy-progesterone				Progestogen	model_5	Internalizing scale
sum_androgens_SG_GA_adj	-0.919427	3.5361	1416	-0.260011	0.794893	hitrtse	436	1430	-7.82069	5.98183	hormone sum	Total Androgens				Androgen	model_5	Hit reaction time SE
sum_androgens_SG_GA_adj	0.856522	0.602495	463.115	1.42162	0.155808	motor	500	914	-0.311919	2.02227	hormone sum	Total Androgens				Androgen	model_5	Early motor skills
sum_androgens_SG_GA_adj	1.13228	0.615152	467.862	1.84065	0.0663055	mental	500	914	-0.0618728	2.32195	hormone sum	Total Androgens				Androgen	model_5	Early mental skills
sum_androgens_SG_GA_adj	-0.158012	1.09055	368.774	-0.144893	0.884875	percentile_correct_raven	390	655	-2.26255	1.94994	hormone sum	Total Androgens				Androgen	model_5	Fluid intelligence
sum_androgens_SG_GA_adj	0.023418	0.046098	412.755	0.508004	0.611722	ADHD_scaled	429	1170	-0.0657395	0.112591	hormone sum	Total Androgens				Androgen	model_5	ADHD
sum_androgens_SG_GA_adj	0.0108561	0.0504812	372.442	0.215053	0.829844	Gen_Tot_scaled	393	669	-0.0866262	0.108384	hormone sum	Total Androgens				Androgen	model_5	Total scale
sum_androgens_SG_GA_adj	0.00993747	0.0497769	371.25	0.19964	0.841871	Gen_Ext_scaled	393	669	-0.0861751	0.106105	hormone sum	Total Androgens				Androgen	model_5	Externalizing scale
sum_androgens_SG_GA_adj	0.001263	0.0502856	373.526	0.0251166	0.979975	Gen_Int_scaled	393	669	-0.0958707	0.0983889	hormone sum	Total Androgens				Androgen	model_5	Internalizing scale
sum_corticosteroids_SG_GA_adj	-5.48406	4.23742	1416	-1.2942	0.195808	hitrtse	436	1430	-13.7541	2.78593	hormone sum	Total Corticosteroids				Corticosteroid	model_5	Hit reaction time SE
sum_corticosteroids_SG_GA_adj	0.280193	0.727528	471.434	0.385131	0.700314	motor	500	914	-1.13176	1.68732	hormone sum	Total Corticosteroids				Corticosteroid	model_5	Early motor skills
sum_corticosteroids_SG_GA_adj	0.6358	0.742115	474.948	0.85674	0.39202	mental	500	914	-0.802804	2.07267	hormone sum	Total Corticosteroids				Corticosteroid	model_5	Early mental skills
sum_corticosteroids_SG_GA_adj	-1.83724	1.30711	363.125	-1.40557	0.160706	percentile_correct_raven	390	655	-4.36058	0.687816	hormone sum	Total Corticosteroids				Corticosteroid	model_5	Fluid intelligence
sum_corticosteroids_SG_GA_adj	0.00271512	0.055373	416.262	0.0490333	0.960916	ADHD_scaled	429	1170	-0.104393	0.109828	hormone sum	Total Corticosteroids				Corticosteroid	model_5	ADHD
sum_corticosteroids_SG_GA_adj	0.0260252	0.0606377	368.4	0.429191	0.668035	Gen_Tot_scaled	393	669	-0.0911124	0.143117	hormone sum	Total Corticosteroids				Corticosteroid	model_5	Total scale
sum_corticosteroids_SG_GA_adj	0.00367493	0.0597516	366.294	0.0615035	0.950992	Gen_Ext_scaled	393	669	-0.11168	0.119114	hormone sum	Total Corticosteroids				Corticosteroid	model_5	Externalizing scale
sum_corticosteroids_SG_GA_adj	0.0341363	0.0603386	368.676	0.565745	0.571911	Gen_Int_scaled	393	669	-0.0825537	0.150544	hormone sum	Total Corticosteroids				Corticosteroid	model_5	Internalizing scale
sum_corticosterone_SG_GA_adj	4.70668	3.03452	1416	1.55104	0.121115	hitrtse	436	1430	-1.21567	10.629	hormone sum	Total Corticosterone				Corticosteroid	model_5	Hit reaction time SE
sum_corticosterone_SG_GA_adj	0.462936	0.516946	473.637	0.895522	0.370963	motor	500	914	-0.539678	1.46329	hormone sum	Total Corticosterone				Corticosteroid	model_5	Early motor skills
sum_corticosterone_SG_GA_adj	0.36093	0.527722	476.935	0.683939	0.494346	mental	500	914	-0.663667	1.38155	hormone sum	Total Corticosterone				Corticosteroid	model_5	Early mental skills
sum_corticosterone_SG_GA_adj	-0.290038	0.952413	384.397	-0.304529	0.760889	percentile_correct_raven	390	655	-2.13199	1.54792	hormone sum	Total Corticosterone				Corticosteroid	model_5	Fluid intelligence
sum_corticosterone_SG_GA_adj	0.0177535	0.0396268	412.626	0.448017	0.654376	ADHD_scaled	429	1170	-0.0589111	0.0943857	hormone sum	Total Corticosterone				Corticosteroid	model_5	ADHD
sum_corticosterone_SG_GA_adj	0.037574	0.0437771	381.304	0.858301	0.391266	Gen_Tot_scaled	393	669	-0.0469319	0.122207	hormone sum	Total Corticosterone				Corticosteroid	model_5	Total scale
sum_corticosterone_SG_GA_adj	0.0587032	0.0431693	381.576	1.35984	0.174684	Gen_Ext_scaled	393	669	-0.0245543	0.142253	hormone sum	Total Corticosterone				Corticosteroid	model_5	Externalizing scale
sum_corticosterone_SG_GA_adj	0.00909195	0.0437422	384.722	0.207853	0.835454	Gen_Int_scaled	393	669	-0.0754139	0.093597	hormone sum	Total Corticosterone				Corticosteroid	model_5	Internalizing scale
sum_cortisol_SG_GA_adj	-6.2924	4.13879	1416	-1.52035	0.128647	hitrtse	436	1430	-14.3699	1.78509	hormone sum	Total Cortisol				Corticosteroid	model_5	Hit reaction time SE
sum_cortisol_SG_GA_adj	0.228658	0.708643	470.488	0.322671	0.747088	motor	500	914	-1.14663	1.59925	hormone sum	Total Cortisol				Corticosteroid	model_5	Early motor skills
sum_cortisol_SG_GA_adj	0.543524	0.723028	474.059	0.751733	0.452585	mental	500	914	-0.857797	1.94367	hormone sum	Total Cortisol				Corticosteroid	model_5	Early mental skills
sum_cortisol_SG_GA_adj	-1.8323	1.27361	361.694	-1.43866	0.151111	percentile_correct_raven	390	655	-4.29038	0.628617	hormone sum	Total Cortisol				Corticosteroid	model_5	Fluid intelligence
sum_cortisol_SG_GA_adj	-0.00066868	0.0540054	416.662	-0.0123817	0.990127	ADHD_scaled	429	1170	-0.105128	0.103804	hormone sum	Total Cortisol				Corticosteroid	model_5	ADHD
sum_cortisol_SG_GA_adj	0.018918	0.0591382	368.093	0.319894	0.74923	Gen_Tot_scaled	393	669	-0.0953302	0.133107	hormone sum	Total Cortisol				Corticosteroid	model_5	Total scale
sum_cortisol_SG_GA_adj	-0.00891168	0.0582631	365.935	-0.152956	0.878517	Gen_Ext_scaled	393	669	-0.121402	0.10364	hormone sum	Total Cortisol				Corticosteroid	model_5	Externalizing scale
sum_cortisol_SG_GA_adj	0.0333087	0.0588364	368.305	0.566124	0.571655	Gen_Int_scaled	393	669	-0.0804878	0.146809	hormone sum	Total Cortisol				Corticosteroid	model_5	Internalizing scale
sum_DHEA_SG_GA_adj	-1.68056	2.58948	1416	-0.648994	0.516447	hitrtse	436	1430	-6.73434	3.37322	hormone sum	Total DHEA				Androgen	model_5	Hit reaction time SE
sum_DHEA_SG_GA_adj	0.928544	0.437521	463.662	2.12228	0.0343434	motor	500	914	0.0804441	1.77542	hormone sum	Total DHEA				Androgen	model_5	Early motor skills
sum_DHEA_SG_GA_adj	0.929979	0.447265	468.052	2.07926	0.0381376	mental	500	914	0.0626624	1.79562	hormone sum	Total DHEA				Androgen	model_5	Early mental skills
sum_DHEA_SG_GA_adj	0.414962	0.807581	378.097	0.513833	0.607669	percentile_correct_raven	390	655	-1.14353	1.97642	hormone sum	Total DHEA				Androgen	model_5	Fluid intelligence
sum_DHEA_SG_GA_adj	0.0153138	0.033834	414.259	0.452616	0.651062	ADHD_scaled	429	1170	-0.0501273	0.0807627	hormone sum	Total DHEA				Androgen	model_5	ADHD
sum_DHEA_SG_GA_adj	0.0570987	0.0371439	376.618	1.53723	0.125077	Gen_Tot_scaled	393	669	-0.0145255	0.128997	hormone sum	Total DHEA				Androgen	model_5	Total scale
sum_DHEA_SG_GA_adj	0.0604798	0.0366483	376.54	1.65028	0.0997201	Gen_Ext_scaled	393	669	-0.0101921	0.131408	hormone sum	Total DHEA				Androgen	model_5	Externalizing scale
sum_DHEA_SG_GA_adj	0.0371835	0.0371173	379.223	1.00178	0.317087	Gen_Int_scaled	393	669	-0.0343919	0.109037	hormone sum	Total DHEA				Androgen	model_5	Internalizing scale
sum_estradiol_SG_GA_adj	-1.35219	2.08021	1416	-0.650028	0.51578	hitrtse	436	1430	-5.41205	2.70766	hormone sum	Total Estradiol				Estrogen	model_5	Hit reaction time SE
sum_estradiol_SG_GA_adj	0.405047	0.352447	476.192	1.14924	0.251032	motor	500	914	-0.278827	1.08688	hormone sum	Total Estradiol				Estrogen	model_5	Early motor skills
sum_estradiol_SG_GA_adj	0.432681	0.359417	479.115	1.20384	0.229246	mental	500	914	-0.264347	1.12839	hormone sum	Total Estradiol				Estrogen	model_5	Early mental skills
sum_estradiol_SG_GA_adj	0.701868	0.637333	375.075	1.10126	0.271491	percentile_correct_raven	390	655	-0.526652	1.93603	hormone sum	Total Estradiol				Estrogen	model_5	Fluid intelligence
sum_estradiol_SG_GA_adj	0.0223433	0.0270152	412.451	0.827066	0.408678	ADHD_scaled	429	1170	-0.0299029	0.074605	hormone sum	Total Estradiol				Estrogen	model_5	ADHD
sum_estradiol_SG_GA_adj	0.0350278	0.0293643	375.846	1.19287	0.233673	Gen_Tot_scaled	393	669	-0.0216645	0.0917772	hormone sum	Total Estradiol				Estrogen	model_5	Total scale
sum_estradiol_SG_GA_adj	0.0477752	0.0289269	375.474	1.65159	0.0994551	Gen_Ext_scaled	393	669	-0.008078	0.103669	hormone sum	Total Estradiol				Estrogen	model_5	Externalizing scale
sum_estradiol_SG_GA_adj	0.0164183	0.0293207	378.03	0.559954	0.575842	Gen_Int_scaled	393	669	-0.0402237	0.0730541	hormone sum	Total Estradiol				Estrogen	model_5	Internalizing scale
sum_estriol_SG_GA_adj	0.337371	3.74504	1416	0.0900848	0.928233	hitrtse	436	1430	-6.97165	7.6464	hormone sum	Total Estriol				Estrogen	model_5	Hit reaction time SE
sum_estriol_SG_GA_adj	0.530055	0.631725	465.446	0.839059	0.401867	motor	500	914	-0.694089	1.75324	hormone sum	Total Estriol				Estrogen	model_5	Early motor skills
sum_estriol_SG_GA_adj	0.622107	0.645247	469.348	0.964138	0.335473	mental	500	914	-0.628378	1.87159	hormone sum	Total Estriol				Estrogen	model_5	Early mental skills
sum_estriol_SG_GA_adj	0.646582	1.16494	383.91	0.555036	0.579193	percentile_correct_raven	390	655	-1.60118	2.89993	hormone sum	Total Estriol				Estrogen	model_5	Fluid intelligence
sum_estriol_SG_GA_adj	-0.00485863	0.0488708	415.605	-0.0994177	0.920855	ADHD_scaled	429	1170	-0.0993808	0.0896841	hormone sum	Total Estriol				Estrogen	model_5	ADHD
sum_estriol_SG_GA_adj	0.0884185	0.0537282	383.5	1.64566	0.100652	Gen_Tot_scaled	393	669	-0.0152922	0.192302	hormone sum	Total Estriol				Estrogen	model_5	Total scale
sum_estriol_SG_GA_adj	0.068763	0.0531799	384.92	1.29302	0.196778	Gen_Ext_scaled	393	669	-0.0338717	0.171607	hormone sum	Total Estriol				Estrogen	model_5	Externalizing scale
sum_estriol_SG_GA_adj	0.0599497	0.053775	387.684	1.11482	0.265616	Gen_Int_scaled	393	669	-0.0439217	0.163864	hormone sum	Total Estriol				Estrogen	model_5	Internalizing scale
sum_estrogens_SG_GA_adj	-1.36054	3.16829	1416	-0.429422	0.667681	hitrtse	436	1430	-7.54396	4.82289	hormone sum	Total Estrogens				Estrogen	model_5	Hit reaction time SE
sum_estrogens_SG_GA_adj	0.705832	0.532503	471.806	1.3255	0.185648	motor	500	914	-0.32691	1.73629	hormone sum	Total Estrogens				Estrogen	model_5	Early motor skills
sum_estrogens_SG_GA_adj	0.575694	0.543803	475.113	1.05864	0.2903	mental	500	914	-0.47862	1.62848	hormone sum	Total Estrogens				Estrogen	model_5	Early mental skills
sum_estrogens_SG_GA_adj	0.666627	0.98164	385.164	0.679095	0.497486	percentile_correct_raven	390	655	-1.22622	2.56727	hormone sum	Total Estrogens				Estrogen	model_5	Fluid intelligence
sum_estrogens_SG_GA_adj	0.0197128	0.0412562	414.874	0.477814	0.633034	ADHD_scaled	429	1170	-0.0600858	0.0995189	hormone sum	Total Estrogens				Estrogen	model_5	ADHD
sum_estrogens_SG_GA_adj	0.0658911	0.0451445	383.173	1.45956	0.14523	Gen_Tot_scaled	393	669	-0.0212485	0.15318	hormone sum	Total Estrogens				Estrogen	model_5	Total scale
sum_estrogens_SG_GA_adj	0.069302	0.0446025	384.492	1.55377	0.121063	Gen_Ext_scaled	393	669	-0.0167888	0.155544	hormone sum	Total Estrogens				Estrogen	model_5	Externalizing scale
sum_estrogens_SG_GA_adj	0.030609	0.045192	387.272	0.677311	0.498613	Gen_Int_scaled	393	669	-0.0566852	0.117935	hormone sum	Total Estrogens				Estrogen	model_5	Internalizing scale
sum_pregnenolone_SG_GA_adj	-3.34531	3.70201	1416	-0.903647	0.366336	hitrtse	436	1430	-10.5704	3.87974	hormone sum	Total Pregnenolone				Progestogen	model_5	Hit reaction time SE
sum_pregnenolone_SG_GA_adj	0.536398	0.613178	506.968	0.874784	0.382106	motor	500	914	-0.654434	1.72252	hormone sum	Total Pregnenolone				Progestogen	model_5	Early motor skills
sum_pregnenolone_SG_GA_adj	-0.0149017	0.622973	506.331	-0.0239204	0.980926	mental	500	914	-1.2248	1.19025	hormone sum	Total Pregnenolone				Progestogen	model_5	Early mental skills
sum_pregnenolone_SG_GA_adj	-0.430737	1.11756	370.509	-0.385426	0.700143	percentile_correct_raven	390	655	-2.5845	1.73386	hormone sum	Total Pregnenolone				Progestogen	model_5	Fluid intelligence
sum_pregnenolone_SG_GA_adj	0.0596286	0.0478191	415.018	1.24696	0.213114	ADHD_scaled	429	1170	-0.0328511	0.152143	hormone sum	Total Pregnenolone				Progestogen	model_5	ADHD
sum_pregnenolone_SG_GA_adj	0.0250349	0.051984	383.308	0.481588	0.630374	Gen_Tot_scaled	393	669	-0.0753704	0.125479	hormone sum	Total Pregnenolone				Progestogen	model_5	Total scale
sum_pregnenolone_SG_GA_adj	0.00896736	0.0513907	384.536	0.174494	0.861569	Gen_Ext_scaled	393	669	-0.0902674	0.108289	hormone sum	Total Pregnenolone				Progestogen	model_5	Externalizing scale
sum_pregnenolone_SG_GA_adj	0.0289142	0.0519039	386.958	0.557072	0.5778	Gen_Int_scaled	393	669	-0.0713471	0.129206	hormone sum	Total Pregnenolone				Progestogen	model_5	Internalizing scale
sum_progesterone_SG_GA_adj	-4.04824	4.31054	1416	-0.939147	0.347815	hitrtse	436	1430	-12.4609	4.36447	hormone sum	Total Progesterone				Progestogen	model_5	Hit reaction time SE
sum_progesterone_SG_GA_adj	0.138427	0.699943	515.877	0.197769	0.843304	motor	500	914	-1.22055	1.49282	hormone sum	Total Progesterone				Progestogen	model_5	Early motor skills
sum_progesterone_SG_GA_adj	-0.107694	0.709886	514.491	-0.151706	0.879479	mental	500	914	-1.48577	1.26619	hormone sum	Total Progesterone				Progestogen	model_5	Early mental skills
sum_progesterone_SG_GA_adj	0.396131	1.28848	370.042	0.307441	0.758681	percentile_correct_raven	390	655	-2.08591	2.89379	hormone sum	Total Progesterone				Progestogen	model_5	Fluid intelligence
sum_progesterone_SG_GA_adj	0.050017	0.0554282	417.347	0.902374	0.367379	ADHD_scaled	429	1170	-0.0572164	0.157222	hormone sum	Total Progesterone				Progestogen	model_5	ADHD
sum_progesterone_SG_GA_adj	0.0436326	0.0601451	387.041	0.725455	0.468611	Gen_Tot_scaled	393	669	-0.0725333	0.159861	hormone sum	Total Progesterone				Progestogen	model_5	Total scale
sum_progesterone_SG_GA_adj	0.0426014	0.0594834	389.013	0.716189	0.474304	Gen_Ext_scaled	393	669	-0.0722022	0.157648	hormone sum	Total Progesterone				Progestogen	model_5	Externalizing scale
sum_progesterone_SG_GA_adj	0.0259116	0.0601414	391.762	0.430845	0.666818	Gen_Int_scaled	393	669	-0.090332	0.142069	hormone sum	Total Progesterone				Progestogen	model_5	Internalizing scale
sum_progestogens_SG_GA_adj	-4.48506	4.26272	1416	-1.05216	0.292907	hitrtse	436	1430	-12.8044	3.83431	hormone sum	Total Progestogens				Progestogen	model_5	Hit reaction time SE
sum_progestogens_SG_GA_adj	0.368093	0.700755	509.764	0.525281	0.599616	motor	500	914	-0.992432	1.72394	hormone sum	Total Progestogens				Progestogen	model_5	Early motor skills
sum_progestogens_SG_GA_adj	-0.0140017	0.71144	509.005	-0.0196808	0.984306	mental	500	914	-1.39539	1.36256	hormone sum	Total Progestogens				Progestogen	model_5	Early mental skills
sum_progestogens_SG_GA_adj	0.105034	1.2797	372.13	0.0820768	0.93463	percentile_correct_raven	390	655	-2.36033	2.58548	hormone sum	Total Progestogens				Progestogen	model_5	Fluid intelligence
sum_progestogens_SG_GA_adj	0.0552031	0.0549044	416.223	1.00544	0.315269	ADHD_scaled	429	1170	-0.0510047	0.161404	hormone sum	Total Progestogens				Progestogen	model_5	ADHD
sum_progestogens_SG_GA_adj	0.038086	0.0596488	386.903	0.638504	0.523523	Gen_Tot_scaled	393	669	-0.077117	0.15336	hormone sum	Total Progestogens				Progestogen	model_5	Total scale
sum_progestogens_SG_GA_adj	0.027025	0.0590099	388.935	0.457974	0.647227	Gen_Ext_scaled	393	669	-0.0868894	0.141126	hormone sum	Total Progestogens				Progestogen	model_5	Externalizing scale
sum_progestogens_SG_GA_adj	0.0304922	0.0596265	391.539	0.511386	0.609369	Gen_Int_scaled	393	669	-0.0847187	0.14569	hormone sum	Total Progestogens				Progestogen	model_5	Internalizing scale
sum_testosterone_SG_GA_adj	-0.543118	3.48993	1416	-0.155624	0.876351	hitrtse	436	1430	-7.35427	6.26803	hormone sum	Total Testosterone				Androgen	model_5	Hit reaction time SE
sum_testosterone_SG_GA_adj	0.566622	0.594056	465.469	0.953819	0.34067	motor	500	914	-0.585827	1.71581	hormone sum	Total Testosterone				Androgen	model_5	Early motor skills
sum_testosterone_SG_GA_adj	0.936471	0.606267	470.018	1.54465	0.123104	mental	500	914	-0.240877	2.10873	hormone sum	Total Testosterone				Androgen	model_5	Early mental skills
sum_testosterone_SG_GA_adj	-0.684862	1.06794	364.281	-0.641294	0.521735	percentile_correct_raven	390	655	-2.74633	1.37842	hormone sum	Total Testosterone				Androgen	model_5	Fluid intelligence
sum_testosterone_SG_GA_adj	0.0279018	0.0453457	413.664	0.615313	0.538686	ADHD_scaled	429	1170	-0.0597985	0.115624	hormone sum	Total Testosterone				Androgen	model_5	ADHD
sum_testosterone_SG_GA_adj	-0.0163835	0.049482	369.254	-0.331099	0.740757	Gen_Tot_scaled	393	669	-0.112017	0.0791267	hormone sum	Total Testosterone				Androgen	model_5	Total scale
sum_testosterone_SG_GA_adj	-0.022435	0.0487514	367.407	-0.460191	0.645652	Gen_Ext_scaled	393	669	-0.11664	0.0716691	hormone sum	Total Testosterone				Androgen	model_5	Externalizing scale
sum_testosterone_SG_GA_adj	-0.0191962	0.0492456	369.559	-0.389806	0.696905	Gen_Int_scaled	393	669	-0.114416	0.075825	hormone sum	Total Testosterone				Androgen	model_5	Internalizing scale

## Sheet: ST4-B
ST4-B: INMA-Sabadell - Linear mixed-effects models for prenatal steroid hormone exposure-neurodevelopment associations with residual diagnostics
predictor	id_inma	outcome	residuals_adj	log2_predictor	variable_group	variable_plot_name	hormone_full_name	hormone	hormone_group	sum_hormone_group	outcome_full_name
cc.16OH_DHEAS_1_m_32w_i_SG_GA_adj	SAB1	hitrtse	-100.689	-0.521845	hormone metabolite	16OH-DHEAS_1	DHEA: 16OH-DHEAS_1	DHEA	Androgen		Hit reaction time SE
cc.16OH_DHEAS_1_m_32w_i_SG_GA_adj	SAB1	hitrtse	-112.8	-0.521845	hormone metabolite	16OH-DHEAS_1	DHEA: 16OH-DHEAS_1	DHEA	Androgen		Hit reaction time SE
cc.16OH_DHEAS_1_m_32w_i_SG_GA_adj	SAB10	hitrtse	243.973	1.7409	hormone metabolite	16OH-DHEAS_1	DHEA: 16OH-DHEAS_1	DHEA	Androgen		Hit reaction time SE
cc.16OH_DHEAS_1_m_32w_i_SG_GA_adj	SAB100	hitrtse	-26.6489	0.697627	hormone metabolite	16OH-DHEAS_1	DHEA: 16OH-DHEAS_1	DHEA	Androgen		Hit reaction time SE
cc.16OH_DHEAS_1_m_32w_i_SG_GA_adj	SAB100	hitrtse	158.555	0.697627	hormone metabolite	16OH-DHEAS_1	DHEA: 16OH-DHEAS_1	DHEA	Androgen		Hit reaction time SE
cc.16OH_DHEAS_1_m_32w_i_SG_GA_adj	SAB100	hitrtse	62.0304	0.697627	hormone metabolite	16OH-DHEAS_1	DHEA: 16OH-DHEAS_1	DHEA	Androgen		Hit reaction time SE
cc.16OH_DHEAS_1_m_32w_i_SG_GA_adj	SAB102	hitrtse	124.007	-0.146065	hormone metabolite	16OH-DHEAS_1	DHEA: 16OH-DHEAS_1	DHEA	Androgen		Hit reaction time SE
cc.16OH_DHEAS_1_m_32w_i_SG_GA_adj	SAB102	hitrtse	63.3462	-0.146065	hormone metabolite	16OH-DHEAS_1	DHEA: 16OH-DHEAS_1	DHEA	Androgen		Hit reaction time SE
cc.16OH_DHEAS_1_m_32w_i_SG_GA_adj	SAB105	hitrtse	-2.26948	0.162425	hormone metabolite	16OH-DHEAS_1	DHEA: 16OH-DHEAS_1	DHEA	Androgen		Hit reaction time SE
cc.16OH_DHEAS_1_m_32w_i_SG_GA_adj	SAB105	hitrtse	-204.934	0.162425	hormone metabolite	16OH-DHEAS_1	DHEA: 16OH-DHEAS_1	DHEA	Androgen		Hit reaction time SE
cc.16OH_DHEAS_1_m_32w_i_SG_GA_adj	SAB105	hitrtse	-10.078	0.162425	hormone metabolite	16OH-DHEAS_1	DHEA: 16OH-DHEAS_1	DHEA	Androgen		Hit reaction time SE
cc.16OH_DHEAS_1_m_32w_i_SG_GA_adj	SAB106	hitrtse	-122.811	-0.617229	hormone metabolite	16OH-DHEAS_1	DHEA: 16OH-DHEAS_1	DHEA	Androgen		Hit reaction time SE
cc.16OH_DHEAS_1_m_32w_i_SG_GA_adj	SAB106	hitrtse	108.725	-0.617229	hormone metabolite	16OH-DHEAS_1	DHEA: 16OH-DHEAS_1	DHEA	Androgen		Hit reaction time SE
cc.16OH_DHEAS_1_m_32w_i_SG_GA_adj	SAB106	hitrtse	77.0921	-0.617229	hormone metabolite	16OH-DHEAS_1	DHEA: 16OH-DHEAS_1	DHEA	Androgen		Hit reaction time SE
cc.16OH_DHEAS_1_m_32w_i_SG_GA_adj	SAB109	hitrtse	76.8375	0.197549	hormone metabolite	16OH-DHEAS_1	DHEA: 16OH-DHEAS_1	DHEA	Androgen		Hit reaction time SE
cc.16OH_DHEAS_1_m_32w_i_SG_GA_adj	SAB109	hitrtse	0.599955	0.197549	hormone metabolite	16OH-DHEAS_1	DHEA: 16OH-DHEAS_1	DHEA	Androgen		Hit reaction time SE
cc.16OH_DHEAS_1_m_32w_i_SG_GA_adj	SAB109	hitrtse	23.7411	0.197549	hormone metabolite	16OH-DHEAS_1	DHEA: 16OH-DHEAS_1	DHEA	Androgen		Hit reaction time SE
cc.16OH_DHEAS_1_m_32w_i_SG_GA_adj	SAB110	hitrtse	39.3923	0.472973	hormone metabolite	16OH-DHEAS_1	DHEA: 16OH-DHEAS_1	DHEA	Androgen		Hit reaction time SE
cc.16OH_DHEAS_1_m_32w_i_SG_GA_adj	SAB110	hitrtse	43.9516	0.472973	hormone metabolite	16OH-DHEAS_1	DHEA: 16OH-DHEAS_1	DHEA	Androgen		Hit reaction time SE
cc.16OH_DHEAS_1_m_32w_i_SG_GA_adj	SAB110	hitrtse	-18.3486	0.472973	hormone metabolite	16OH-DHEAS_1	DHEA: 16OH-DHEAS_1	DHEA	Androgen		Hit reaction time SE
cc.16OH_DHEAS_1_m_32w_i_SG_GA_adj	SAB111	hitrtse	35.3547	2.17401	hormone metabolite	16OH-DHEAS_1	DHEA: 16OH-DHEAS_1	DHEA	Androgen		Hit reaction time SE
cc.16OH_DHEAS_1_m_32w_i_SG_GA_adj	SAB111	hitrtse	-86.1049	2.17401	hormone metabolite	16OH-DHEAS_1	DHEA: 16OH-DHEAS_1	DHEA	Androgen		Hit reaction time SE
cc.16OH_DHEAS_1_m_32w_i_SG_GA_adj	SAB111	hitrtse	225.643	2.17401	hormone metabolite	16OH-DHEAS_1	DHEA: 16OH-DHEAS_1	DHEA	Androgen		Hit reaction time SE
cc.16OH_DHEAS_1_m_32w_i_SG_GA_adj	SAB112	hitrtse	3.41773	-0.64448	hormone metabolite	16OH-DHEAS_1	DHEA: 16OH-DHEAS_1	DHEA	Androgen		Hit reaction time SE
cc.16OH_DHEAS_1_m_32w_i_SG_GA_adj	SAB112	hitrtse	-4.33124	-0.64448	hormone metabolite	16OH-DHEAS_1	DHEA: 16OH-DHEAS_1	DHEA	Androgen		Hit reaction time SE
cc.16OH_DHEAS_1_m_32w_i_SG_GA_adj	SAB112	hitrtse	69.7528	-0.64448	hormone metabolite	16OH-DHEAS_1	DHEA: 16OH-DHEAS_1	DHEA	Androgen		Hit reaction time SE
cc.16OH_DHEAS_1_m_32w_i_SG_GA_adj	SAB113	hitrtse	7.39089	-1.10837	hormone metabolite	16OH-DHEAS_1	DHEA: 16OH-DHEAS_1	DHEA	Androgen		Hit reaction time SE
cc.16OH_DHEAS_1_m_32w_i_SG_GA_adj	SAB113	hitrtse	136.628	-1.10837	hormone metabolite	16OH-DHEAS_1	DHEA: 16OH-DHEAS_1	DHEA	Androgen		Hit reaction time SE
cc.16OH_DHEAS_1_m_32w_i_SG_GA_adj	SAB113	hitrtse	41.0577	-1.10837	hormone metabolite	16OH-DHEAS_1	DHEA: 16OH-DHEAS_1	DHEA	Androgen		Hit reaction time SE
cc.16OH_DHEAS_1_m_32w_i_SG_GA_adj	SAB115	hitrtse	-145.633	-0.477892	hormone metabolite	16OH-DHEAS_1	DHEA: 16OH-DHEAS_1	DHEA	Androgen		Hit reaction time SE
cc.16OH_DHEAS_1_m_32w_i_SG_GA_adj	SAB115	hitrtse	98.9626	-0.477892	hormone metabolite	16OH-DHEAS_1	DHEA: 16OH-DHEAS_1	DHEA	Androgen		Hit reaction time SE
cc.16OH_DHEAS_1_m_32w_i_SG_GA_adj	SAB115	hitrtse	-112.035	-0.477892	hormone metabolite	16OH-DHEAS_1	DHEA: 16OH-DHEAS_1	DHEA	Androgen		Hit reaction time SE
cc.16OH_DHEAS_1_m_32w_i_SG_GA_adj	SAB116	hitrtse	145.46	-0.640253	hormone metabolite	16OH-DHEAS_1	DHEA: 16OH-DHEAS_1	DHEA	Androgen		Hit reaction time SE
cc.16OH_DHEAS_1_m_32w_i_SG_GA_adj	SAB116	hitrtse	49.9896	-0.640253	hormone metabolite	16OH-DHEAS_1	DHEA: 16OH-DHEAS_1	DHEA	Androgen		Hit reaction time SE
cc.16OH_DHEAS_1_m_32w_i_SG_GA_adj	SAB116	hitrtse	-54.5257	-0.640253	hormone metabolite	16OH-DHEAS_1	DHEA: 16OH-DHEAS_1	DHEA	Androgen		Hit reaction time SE
cc.16OH_DHEAS_1_m_32w_i_SG_GA_adj	SAB117	hitrtse	81.3409	-1.72979	hormone metabolite	16OH-DHEAS_1	DHEA: 16OH-DHEAS_1	DHEA	Androgen		Hit reaction time SE
cc.16OH_DHEAS_1_m_32w_i_SG_GA_adj	SAB117	hitrtse	-115.601	-1.72979	hormone metabolite	16OH-DHEAS_1	DHEA: 16OH-DHEAS_1	DHEA	Androgen		Hit reaction time SE
cc.16OH_DHEAS_1_m_32w_i_SG_GA_adj	SAB117	hitrtse	-72.8921	-1.72979	hormone metabolite	16OH-DHEAS_1	DHEA: 16OH-DHEAS_1	DHEA	Androgen		Hit reaction time SE
cc.16OH_DHEAS_1_m_32w_i_SG_GA_adj	SAB118	hitrtse	116.275	1.34307	hormone metabolite	16OH-DHEAS_1	DHEA: 16OH-DHEAS_1	DHEA	Androgen		Hit reaction time SE
cc.16OH_DHEAS_1_m_32w_i_SG_GA_adj	SAB119	hitrtse	199.518	0.872863	hormone metabolite	16OH-DHEAS_1	DHEA: 16OH-DHEAS_1	DHEA	Androgen		Hit reaction time SE
cc.16OH_DHEAS_1_m_32w_i_SG_GA_adj	SAB119	hitrtse	-152.033	0.872863	hormone metabolite	16OH-DHEAS_1	DHEA: 16OH-DHEAS_1	DHEA	Androgen		Hit reaction time SE
cc.16OH_DHEAS_1_m_32w_i_SG_GA_adj	SAB119	hitrtse	-57.5656	0.872863	hormone metabolite	16OH-DHEAS_1	DHEA: 16OH-DHEAS_1	DHEA	Androgen		Hit reaction time SE
cc.16OH_DHEAS_1_m_32w_i_SG_GA_adj	SAB12	hitrtse	-119.921	-1.67198	hormone metabolite	16OH-DHEAS_1	DHEA: 16OH-DHEAS_1	DHEA	Androgen		Hit reaction time SE
cc.16OH_DHEAS_1_m_32w_i_SG_GA_adj	SAB12	hitrtse	141.079	-1.67198	hormone metabolite	16OH-DHEAS_1	DHEA: 16OH-DHEAS_1	DHEA	Androgen		Hit reaction time SE
cc.16OH_DHEAS_1_m_32w_i_SG_GA_adj	SAB12	hitrtse	180.433	-1.67198	hormone metabolite	16OH-DHEAS_1	DHEA: 16OH-DHEAS_1	DHEA	Androgen		Hit reaction time SE
cc.16OH_DHEAS_1_m_32w_i_SG_GA_adj	SAB120	hitrtse	44.787	-2.49016	hormone metabolite	16OH-DHEAS_1	DHEA: 16OH-DHEAS_1	DHEA	Androgen		Hit reaction time SE
cc.16OH_DHEAS_1_m_32w_i_SG_GA_adj	SAB120	hitrtse	-107.29	-2.49016	hormone metabolite	16OH-DHEAS_1	DHEA: 16OH-DHEAS_1	DHEA	Androgen		Hit reaction time SE
cc.16OH_DHEAS_1_m_32w_i_SG_GA_adj	SAB120	hitrtse	-1.63536	-2.49016	hormone metabolite	16OH-DHEAS_1	DHEA: 16OH-DHEAS_1	DHEA	Androgen		Hit reaction time SE
cc.16OH_DHEAS_1_m_32w_i_SG_GA_adj	SAB121	hitrtse	-103.898	0.40438	hormone metabolite	16OH-DHEAS_1	DHEA: 16OH-DHEAS_1	DHEA	Androgen		Hit reaction time SE
cc.16OH_DHEAS_1_m_32w_i_SG_GA_adj	SAB121	hitrtse	42.9015	0.40438	hormone metabolite	16OH-DHEAS_1	DHEA: 16OH-DHEAS_1	DHEA	Androgen		Hit reaction time SE
cc.16OH_DHEAS_1_m_32w_i_SG_GA_adj	SAB121	hitrtse	-128.093	0.40438	hormone metabolite	16OH-DHEAS_1	DHEA: 16OH-DHEAS_1	DHEA	Androgen		Hit reaction time SE
cc.16OH_DHEAS_1_m_32w_i_SG_GA_adj	SAB123	hitrtse	-4.07673	1.67639	hormone metabolite	16OH-DHEAS_1	DHEA: 16OH-DHEAS_1	DHEA	Androgen		Hit reaction time SE
cc.16OH_DHEAS_1_m_32w_i_SG_GA_adj	SAB123	hitrtse	141.033	1.67639	hormone metabolite	16OH-DHEAS_1	DHEA: 16OH-DHEAS_1	DHEA	Androgen		Hit reaction time SE
cc.16OH_DHEAS_1_m_32w_i_SG_GA_adj	SAB123	hitrtse	119.081	1.67639	hormone metabolite	16OH-DHEAS_1	DHEA: 16OH-DHEAS_1	DHEA	Androgen		Hit reaction time SE
cc.16OH_DHEAS_1_m_32w_i_SG_GA_adj	SAB128	hitrtse	235.878	0.269897	hormone metabolite	16OH-DHEAS_1	DHEA: 16OH-DHEAS_1	DHEA	Androgen		Hit reaction time SE
cc.16OH_DHEAS_1_m_32w_i_SG_GA_adj	SAB128	hitrtse	-153.035	0.269897	hormone metabolite	16OH-DHEAS_1	DHEA: 16OH-DHEAS_1	DHEA	Androgen		Hit reaction time SE
cc.16OH_DHEAS_1_m_32w_i_SG_GA_adj	SAB128	hitrtse	21.8813	0.269897	hormone metabolite	16OH-DHEAS_1	DHEA: 16OH-DHEAS_1	DHEA	Androgen		Hit reaction time SE
cc.16OH_DHEAS_1_m_32w_i_SG_GA_adj	SAB129	hitrtse	28.6735	0.935438	hormone metabolite	16OH-DHEAS_1	DHEA: 16OH-DHEAS_1	DHEA	Androgen		Hit reaction time SE
cc.16OH_DHEAS_1_m_32w_i_SG_GA_adj	SAB129	hitrtse	163.968	0.935438	hormone metabolite	16OH-DHEAS_1	DHEA: 16OH-DHEAS_1	DHEA	Androgen		Hit reaction time SE
cc.16OH_DHEAS_1_m_32w_i_SG_GA_adj	SAB129	hitrtse	-34.4917	0.935438	hormone metabolite	16OH-DHEAS_1	DHEA: 16OH-DHEAS_1	DHEA	Androgen		Hit reaction time SE
cc.16OH_DHEAS_1_m_32w_i_SG_GA_adj	SAB13	hitrtse	124.085	1.38324	hormone metabolite	16OH-DHEAS_1	DHEA: 16OH-DHEAS_1	DHEA	Androgen		Hit reaction time SE
cc.16OH_DHEAS_1_m_32w_i_SG_GA_adj	SAB13	hitrtse	-128.602	1.38324	hormone metabolite	16OH-DHEAS_1	DHEA: 16OH-DHEAS_1	DHEA	Androgen		Hit reaction time SE
cc.16OH_DHEAS_1_m_32w_i_SG_GA_adj	SAB13	hitrtse	34.4864	1.38324	hormone metabolite	16OH-DHEAS_1	DHEA: 16OH-DHEAS_1	DHEA	Androgen		Hit reaction time SE
cc.16OH_DHEAS_1_m_32w_i_SG_GA_adj	SAB130	hitrtse	-67.9772	1.30445	hormone metabolite	16OH-DHEAS_1	DHEA: 16OH-DHEAS_1	DHEA	Androgen		Hit reaction time SE
cc.16OH_DHEAS_1_m_32w_i_SG_GA_adj	SAB130	hitrtse	-87.714	1.30445	hormone metabolite	16OH-DHEAS_1	DHEA: 16OH-DHEAS_1	DHEA	Androgen		Hit reaction time SE
cc.16OH_DHEAS_1_m_32w_i_SG_GA_adj	SAB130	hitrtse	72.0545	1.30445	hormone metabolite	16OH-DHEAS_1	DHEA: 16OH-DHEAS_1	DHEA	Androgen		Hit reaction time SE
cc.16OH_DHEAS_1_m_32w_i_SG_GA_adj	SAB131	hitrtse	52.7063	-3.50843	hormone metabolite	16OH-DHEAS_1	DHEA: 16OH-DHEAS_1	DHEA	Androgen		Hit reaction time SE
cc.16OH_DHEAS_1_m_32w_i_SG_GA_adj	SAB131	hitrtse	12.3303	-3.50843	hormone metabolite	16OH-DHEAS_1	DHEA: 16OH-DHEAS_1	DHEA	Androgen		Hit reaction time SE
cc.16OH_DHEAS_1_m_32w_i_SG_GA_adj	SAB131	hitrtse	-90.3437	-3.50843	hormone metabolite	16OH-DHEAS_1	DHEA: 16OH-DHEAS_1	DHEA	Androgen		Hit reaction time SE
cc.16OH_DHEAS_1_m_32w_i_SG_GA_adj	SAB132	hitrtse	197.112	0.663999	hormone metabolite	16OH-DHEAS_1	DHEA: 16OH-DHEAS_1	DHEA	Androgen		Hit reaction time SE
cc.16OH_DHEAS_1_m_32w_i_SG_GA_adj	SAB132	hitrtse	-121.473	0.663999	hormone metabolite	16OH-DHEAS_1	DHEA: 16OH-DHEAS_1	DHEA	Androgen		Hit reaction time SE
cc.16OH_DHEAS_1_m_32w_i_SG_GA_adj	SAB132	hitrtse	-45.187	0.663999	hormone metabolite	16OH-DHEAS_1	DHEA: 16OH-DHEAS_1	DHEA	Androgen		Hit reaction time SE
cc.16OH_DHEAS_1_m_32w_i_SG_GA_adj	SAB133	hitrtse	1.19831	1.91417	hormone metabolite	16OH-DHEAS_1	DHEA: 16OH-DHEAS_1	DHEA	Androgen		Hit reaction time SE
cc.16OH_DHEAS_1_m_32w_i_SG_GA_adj	SAB133	hitrtse	-89.2664	1.91417	hormone metabolite	16OH-DHEAS_1	DHEA: 16OH-DHEAS_1	DHEA	Androgen		Hit reaction time SE
cc.16OH_DHEAS_1_m_32w_i_SG_GA_adj	SAB133	hitrtse	99.9877	1.91417	hormone metabolite	16OH-DHEAS_1	DHEA: 16OH-DHEAS_1	DHEA	Androgen		Hit reaction time SE
cc.16OH_DHEAS_1_m_32w_i_SG_GA_adj	SAB134	hitrtse	126.347	-2.60583	hormone metabolite	16OH-DHEAS_1	DHEA: 16OH-DHEAS_1	DHEA	Androgen		Hit reaction time SE
cc.16OH_DHEAS_1_m_32w_i_SG_GA_adj	SAB134	hitrtse	4.82071	-2.60583	hormone metabolite	16OH-DHEAS_1	DHEA: 16OH-DHEAS_1	DHEA	Androgen		Hit reaction time SE
cc.16OH_DHEAS_1_m_32w_i_SG_GA_adj	SAB134	hitrtse	-138.765	-2.60583	hormone metabolite	16OH-DHEAS_1	DHEA: 16OH-DHEAS_1	DHEA	Androgen		Hit reaction time SE
cc.16OH_DHEAS_1_m_32w_i_SG_GA_adj	SAB135	hitrtse	-158.928	0.259575	hormone metabolite	16OH-DHEAS_1	DHEA: 16OH-DHEAS_1	DHEA	Androgen		Hit reaction time SE
cc.16OH_DHEAS_1_m_32w_i_SG_GA_adj	SAB135	hitrtse	14.6305	0.259575	hormone metabolite	16OH-DHEAS_1	DHEA: 16OH-DHEAS_1	DHEA	Androgen		Hit reaction time SE
cc.16OH_DHEAS_1_m_32w_i_SG_GA_adj	SAB135	hitrtse	95.978	0.259575	hormone metabolite	16OH-DHEAS_1	DHEA: 16OH-DHEAS_1	DHEA	Androgen		Hit reaction time SE
cc.16OH_DHEAS_1_m_32w_i_SG_GA_adj	SAB138	hitrtse	147.019	0.923806	hormone metabolite	16OH-DHEAS_1	DHEA: 16OH-DHEAS_1	DHEA	Androgen		Hit reaction time SE
cc.16OH_DHEAS_1_m_32w_i_SG_GA_adj	SAB138	hitrtse	155.748	0.923806	hormone metabolite	16OH-DHEAS_1	DHEA: 16OH-DHEAS_1	DHEA	Androgen		Hit reaction time SE
cc.16OH_DHEAS_1_m_32w_i_SG_GA_adj	SAB138	hitrtse	-34.4963	0.923806	hormone metabolite	16OH-DHEAS_1	DHEA: 16OH-DHEAS_1	DHEA	Androgen		Hit reaction time SE
cc.16OH_DHEAS_1_m_32w_i_SG_GA_adj	SAB139	hitrtse	-48.6545	1.34496	hormone metabolite	16OH-DHEAS_1	DHEA: 16OH-DHEAS_1	DHEA	Androgen		Hit reaction time SE
cc.16OH_DHEAS_1_m_32w_i_SG_GA_adj	SAB139	hitrtse	-71.3977	1.34496	hormone metabolite	16OH-DHEAS_1	DHEA: 16OH-DHEAS_1	DHEA	Androgen		Hit reaction time SE
cc.16OH_DHEAS_1_m_32w_i_SG_GA_adj	SAB139	hitrtse	146.528	1.34496	hormone metabolite	16OH-DHEAS_1	DHEA: 16OH-DHEAS_1	DHEA	Androgen		Hit reaction time SE
cc.16OH_DHEAS_1_m_32w_i_SG_GA_adj	SAB14	hitrtse	103.844	-0.476205	hormone metabolite	16OH-DHEAS_1	DHEA: 16OH-DHEAS_1	DHEA	Androgen		Hit reaction time SE
cc.16OH_DHEAS_1_m_32w_i_SG_GA_adj	SAB14	hitrtse	84.0961	-0.476205	hormone metabolite	16OH-DHEAS_1	DHEA: 16OH-DHEAS_1	DHEA	Androgen		Hit reaction time SE
cc.16OH_DHEAS_1_m_32w_i_SG_GA_adj	SAB14	hitrtse	80.333	-0.476205	hormone metabolite	16OH-DHEAS_1	DHEA: 16OH-DHEAS_1	DHEA	Androgen		Hit reaction time SE
cc.16OH_DHEAS_1_m_32w_i_SG_GA_adj	SAB142	hitrtse	115.546	-1.1461	hormone metabolite	16OH-DHEAS_1	DHEA: 16OH-DHEAS_1	DHEA	Androgen		Hit reaction time SE
cc.16OH_DHEAS_1_m_32w_i_SG_GA_adj	SAB144	hitrtse	-66.1203	1.28454	hormone metabolite	16OH-DHEAS_1	DHEA: 16OH-DHEAS_1	DHEA	Androgen		Hit reaction time SE
cc.16OH_DHEAS_1_m_32w_i_SG_GA_adj	SAB144	hitrtse	-170.155	1.28454	hormone metabolite	16OH-DHEAS_1	DHEA: 16OH-DHEAS_1	DHEA	Androgen		Hit reaction time SE
cc.16OH_DHEAS_1_m_32w_i_SG_GA_adj	SAB144	hitrtse	93.9401	1.28454	hormone metabolite	16OH-DHEAS_1	DHEA: 16OH-DHEAS_1	DHEA	Androgen		Hit reaction time SE
cc.16OH_DHEAS_1_m_32w_i_SG_GA_adj	SAB148	hitrtse	21.836	-0.626368	hormone metabolite	16OH-DHEAS_1	DHEA: 16OH-DHEAS_1	DHEA	Androgen		Hit reaction time SE
cc.16OH_DHEAS_1_m_32w_i_SG_GA_adj	SAB150	hitrtse	-12.0353	0.364364	hormone metabolite	16OH-DHEAS_1	DHEA: 16OH-DHEAS_1	DHEA	Androgen		Hit reaction time SE
cc.16OH_DHEAS_1_m_32w_i_SG_GA_adj	SAB150	hitrtse	-49.3395	0.364364	hormone metabolite	16OH-DHEAS_1	DHEA: 16OH-DHEAS_1	DHEA	Androgen		Hit reaction time SE
cc.16OH_DHEAS_1_m_32w_i_SG_GA_adj	SAB150	hitrtse	187.573	0.364364	hormone metabolite	16OH-DHEAS_1	DHEA: 16OH-DHEAS_1	DHEA	Androgen		Hit reaction time SE
cc.16OH_DHEAS_1_m_32w_i_SG_GA_adj	SAB154	hitrtse	226.99	-0.0999572	hormone metabolite	16OH-DHEAS_1	DHEA: 16OH-DHEAS_1	DHEA	Androgen		Hit reaction time SE
cc.16OH_DHEAS_1_m_32w_i_SG_GA_adj	SAB154	hitrtse	-82.1087	-0.0999572	hormone metabolite	16OH-DHEAS_1	DHEA: 16OH-DHEAS_1	DHEA	Androgen		Hit reaction time SE
cc.16OH_DHEAS_1_m_32w_i_SG_GA_adj	SAB154	hitrtse	-29.9902	-0.0999572	hormone metabolite	16OH-DHEAS_1	DHEA: 16OH-DHEAS_1	DHEA	Androgen		Hit reaction time SE
cc.16OH_DHEAS_1_m_32w_i_SG_GA_adj	SAB155	hitrtse	13.5425	-2.89471	hormone metabolite	16OH-DHEAS_1	DHEA: 16OH-DHEAS_1	DHEA	Androgen		Hit reaction time SE
cc.16OH_DHEAS_1_m_32w_i_SG_GA_adj	SAB155	hitrtse	-172.979	-2.89471	hormone metabolite	16OH-DHEAS_1	DHEA: 16OH-DHEAS_1	DHEA	Androgen		Hit reaction time SE
cc.16OH_DHEAS_1_m_32w_i_SG_GA_adj	SAB155	hitrtse	-15.3266	-2.89471	hormone metabolite	16OH-DHEAS_1	DHEA: 16OH-DHEAS_1	DHEA	Androgen		Hit reaction time SE
cc.16OH_DHEAS_1_m_32w_i_SG_GA_adj	SAB157	hitrtse	-140.017	0.189419	hormone metabolite	16OH-DHEAS_1	DHEA: 16OH-DHEAS_1	DHEA	Androgen		Hit reaction time SE
cc.16OH_DHEAS_1_m_32w_i_SG_GA_adj	SAB158	hitrtse	148.283	-0.141303	hormone metabolite	16OH-DHEAS_1	DHEA: 16OH-DHEAS_1	DHEA	Androgen		Hit reaction time SE
cc.16OH_DHEAS_1_m_32w_i_SG_GA_adj	SAB158	hitrtse	79.3603	-0.141303	hormone metabolite	16OH-DHEAS_1	DHEA: 16OH-DHEAS_1	DHEA	Androgen		Hit reaction time SE
cc.16OH_DHEAS_1_m_32w_i_SG_GA_adj	SAB158	hitrtse	-133.228	-0.141303	hormone metabolite	16OH-DHEAS_1	DHEA: 16OH-DHEAS_1	DHEA	Androgen		Hit reaction time SE
cc.16OH_DHEAS_1_m_32w_i_SG_GA_adj	SAB159	hitrtse	137.848	0.51028	hormone metabolite	16OH-DHEAS_1	DHEA: 16OH-DHEAS_1	DHEA	Androgen		Hit reaction time SE
cc.16OH_DHEAS_1_m_32w_i_SG_GA_adj	SAB159	hitrtse	-73.6855	0.51028	hormone metabolite	16OH-DHEAS_1	DHEA: 16OH-DHEAS_1	DHEA	Androgen		Hit reaction time SE
cc.16OH_DHEAS_1_m_32w_i_SG_GA_adj	SAB16	hitrtse	9.18265	-0.47059	hormone metabolite	16OH-DHEAS_1	DHEA: 16OH-DHEAS_1	DHEA	Androgen		Hit reaction time SE
cc.16OH_DHEAS_1_m_32w_i_SG_GA_adj	SAB16	hitrtse	211.552	-0.47059	hormone metabolite	16OH-DHEAS_1	DHEA: 16OH-DHEAS_1	DHEA	Androgen		Hit reaction time SE
cc.16OH_DHEAS_1_m_32w_i_SG_GA_adj	SAB16	hitrtse	-75.4887	-0.47059	hormone metabolite	16OH-DHEAS_1	DHEA: 16OH-DHEAS_1	DHEA	Androgen		Hit reaction time SE
cc.16OH_DHEAS_1_m_32w_i_SG_GA_adj	SAB160	hitrtse	123.801	-0.719204	hormone metabolite	16OH-DHEAS_1	DHEA: 16OH-DHEAS_1	DHEA	Androgen		Hit reaction time SE
cc.16OH_DHEAS_1_m_32w_i_SG_GA_adj	SAB160	hitrtse	-63.8127	-0.719204	hormone metabolite	16OH-DHEAS_1	DHEA: 16OH-DHEAS_1	DHEA	Androgen		Hit reaction time SE
cc.16OH_DHEAS_1_m_32w_i_SG_GA_adj	SAB160	hitrtse	7.52226	-0.719204	hormone metabolite	16OH-DHEAS_1	DHEA: 16OH-DHEAS_1	DHEA	Androgen		Hit reaction time SE
cc.16OH_DHEAS_1_m_32w_i_SG_GA_adj	SAB161	hitrtse	55.7022	0.862653	hormone metabolite	16OH-DHEAS_1	DHEA: 16OH-DHEAS_1	DHEA	Androgen		Hit reaction time SE
cc.16OH_DHEAS_1_m_32w_i_SG_GA_adj	SAB161	hitrtse	52.3281	0.862653	hormone metabolite	16OH-DHEAS_1	DHEA: 16OH-DHEAS_1	DHEA	Androgen		Hit reaction time SE
cc.16OH_DHEAS_1_m_32w_i_SG_GA_adj	SAB161	hitrtse	-99.5204	0.862653	hormone metabolite	16OH-DHEAS_1	DHEA: 16OH-DHEAS_1	DHEA	Androgen		Hit reaction time SE
cc.16OH_DHEAS_1_m_32w_i_SG_GA_adj	SAB161	hitrtse	-176.053	0.862653	hormone metabolite	16OH-DHEAS_1	DHEA: 16OH-DHEAS_1	DHEA	Androgen		Hit reaction time SE
cc.16OH_DHEAS_1_m_32w_i_SG_GA_adj	SAB162	hitrtse	25.9999	0.877146	hormone metabolite	16OH-DHEAS_1	DHEA: 16OH-DHEAS_1	DHEA	Androgen		Hit reaction time SE
cc.16OH_DHEAS_1_m_32w_i_SG_GA_adj	SAB162	hitrtse	-135.687	0.877146	hormone metabolite	16OH-DHEAS_1	DHEA: 16OH-DHEAS_1	DHEA	Androgen		Hit reaction time SE
cc.16OH_DHEAS_1_m_32w_i_SG_GA_adj	SAB162	hitrtse	7.55749	0.877146	hormone metabolite	16OH-DHEAS_1	DHEA: 16OH-DHEAS_1	DHEA	Androgen		Hit reaction time SE
cc.16OH_DHEAS_1_m_32w_i_SG_GA_adj	SAB163	hitrtse	-179.17	1.61454	hormone metabolite	16OH-DHEAS_1	DHEA: 16OH-DHEAS_1	DHEA	Androgen		Hit reaction time SE
cc.16OH_DHEAS_1_m_32w_i_SG_GA_adj	SAB163	hitrtse	54.6545	1.61454	hormone metabolite	16OH-DHEAS_1	DHEA: 16OH-DHEAS_1	DHEA	Androgen		Hit reaction time SE
cc.16OH_DHEAS_1_m_32w_i_SG_GA_adj	SAB163	hitrtse	-21.7534	1.61454	hormone metabolite	16OH-DHEAS_1	DHEA: 16OH-DHEAS_1	DHEA	Androgen		Hit reaction time SE
cc.16OH_DHEAS_1_m_32w_i_SG_GA_adj	SAB166	hitrtse	15.9089	0.132556	hormone metabolite	16OH-DHEAS_1	DHEA: 16OH-DHEAS_1	DHEA	Androgen		Hit reaction time SE
cc.16OH_DHEAS_1_m_32w_i_SG_GA_adj	SAB166	hitrtse	25.3502	0.132556	hormone metabolite	16OH-DHEAS_1	DHEA: 16OH-DHEAS_1	DHEA	Androgen		Hit reaction time SE
cc.16OH_DHEAS_1_m_32w_i_SG_GA_adj	SAB166	hitrtse	-114.216	0.132556	hormone metabolite	16OH-DHEAS_1	DHEA: 16OH-DHEAS_1	DHEA	Androgen		Hit reaction time SE
cc.16OH_DHEAS_1_m_32w_i_SG_GA_adj	SAB167	hitrtse	137.523	0.283006	hormone metabolite	16OH-DHEAS_1	DHEA: 16OH-DHEAS_1	DHEA	Androgen		Hit reaction time SE
cc.16OH_DHEAS_1_m_32w_i_SG_GA_adj	SAB168	hitrtse	70.4262	-4.08222	hormone metabolite	16OH-DHEAS_1	DHEA: 16OH-DHEAS_1	DHEA	Androgen		Hit reaction time SE
cc.16OH_DHEAS_1_m_32w_i_SG_GA_adj	SAB168	hitrtse	-179.552	-4.08222	hormone metabolite	16OH-DHEAS_1	DHEA: 16OH-DHEAS_1	DHEA	Androgen		Hit reaction time SE
cc.16OH_DHEAS_1_m_32w_i_SG_GA_adj	SAB168	hitrtse	-22.2449	-4.08222	hormone metabolite	16OH-DHEAS_1	DHEA: 16OH-DHEAS_1	DHEA	Androgen		Hit reaction time SE
cc.16OH_DHEAS_1_m_32w_i_SG_GA_adj	SAB169	hitrtse	-57.1603	1.29634	hormone metabolite	16OH-DHEAS_1	DHEA: 16OH-DHEAS_1	DHEA	Androgen		Hit reaction time SE
cc.16OH_DHEAS_1_m_32w_i_SG_GA_adj	SAB169	hitrtse	22.1989	1.29634	hormone metabolite	16OH-DHEAS_1	DHEA: 16OH-DHEAS_1	DHEA	Androgen		Hit reaction time SE
cc.16OH_DHEAS_1_m_32w_i_SG_GA_adj	SAB169	hitrtse	-156.924	1.29634	hormone metabolite	16OH-DHEAS_1	DHEA: 16OH-DHEAS_1	DHEA	Androgen		Hit reaction time SE
cc.16OH_DHEAS_1_m_32w_i_SG_GA_adj	SAB169	hitrtse	-65.8833	1.29634	hormone metabolite	16OH-DHEAS_1	DHEA: 16OH-DHEAS_1	DHEA	Androgen		Hit reaction time SE
cc.16OH_DHEAS_1_m_32w_i_SG_GA_adj	SAB17	hitrtse	11.8684	1.56372	hormone metabolite	16OH-DHEAS_1	DHEA: 16OH-DHEAS_1	DHEA	Androgen		Hit reaction time SE
cc.16OH_DHEAS_1_m_32w_i_SG_GA_adj	SAB17	hitrtse	-149.599	1.56372	hormone metabolite	16OH-DHEAS_1	DHEA: 16OH-DHEAS_1	DHEA	Androgen		Hit reaction time SE
cc.16OH_DHEAS_1_m_32w_i_SG_GA_adj	SAB17	hitrtse	-19.3698	1.56372	hormone metabolite	16OH-DHEAS_1	DHEA: 16OH-DHEAS_1	DHEA	Androgen		Hit reaction time SE
cc.16OH_DHEAS_1_m_32w_i_SG_GA_adj	SAB170	hitrtse	110.885	-3.5312	hormone metabolite	16OH-DHEAS_1	DHEA: 16OH-DHEAS_1	DHEA	Androgen		Hit reaction time SE
cc.16OH_DHEAS_1_m_32w_i_SG_GA_adj	SAB170	hitrtse	-21.4768	-3.5312	hormone metabolite	16OH-DHEAS_1	DHEA: 16OH-DHEAS_1	DHEA	Androgen		Hit reaction time SE
cc.16OH_DHEAS_1_m_32w_i_SG_GA_adj	SAB170	hitrtse	-59.3738	-3.5312	hormone metabolite	16OH-DHEAS_1	DHEA: 16OH-DHEAS_1	DHEA	Androgen		Hit reaction time SE
cc.16OH_DHEAS_1_m_32w_i_SG_GA_adj	SAB171	hitrtse	62.2064	-0.420697	hormone metabolite	16OH-DHEAS_1	DHEA: 16OH-DHEAS_1	DHEA	Androgen		Hit reaction time SE
cc.16OH_DHEAS_1_m_32w_i_SG_GA_adj	SAB171	hitrtse	29.3566	-0.420697	hormone metabolite	16OH-DHEAS_1	DHEA: 16OH-DHEAS_1	DHEA	Androgen		Hit reaction time SE
cc.16OH_DHEAS_1_m_32w_i_SG_GA_adj	SAB171	hitrtse	-115.589	-0.420697	hormone metabolite	16OH-DHEAS_1	DHEA: 16OH-DHEAS_1	DHEA	Androgen		Hit reaction time SE
cc.16OH_DHEAS_1_m_32w_i_SG_GA_adj	SAB172	hitrtse	122.923	-0.585975	hormone metabolite	16OH-DHEAS_1	DHEA: 16OH-DHEAS_1	DHEA	Androgen		Hit reaction time SE
cc.16OH_DHEAS_1_m_32w_i_SG_GA_adj	SAB172	hitrtse	181.415	-0.585975	hormone metabolite	16OH-DHEAS_1	DHEA: 16OH-DHEAS_1	DHEA	Androgen		Hit reaction time SE
cc.16OH_DHEAS_1_m_32w_i_SG_GA_adj	SAB172	hitrtse	5.4982	-0.585975	hormone metabolite	16OH-DHEAS_1	DHEA: 16OH-DHEAS_1	DHEA	Androgen		Hit reaction time SE
cc.16OH_DHEAS_1_m_32w_i_SG_GA_adj	SAB173	hitrtse	91.8005	-4.0231	hormone metabolite	16OH-DHEAS_1	DHEA: 16OH-DHEAS_1	DHEA	Androgen		Hit reaction time SE
cc.16OH_DHEAS_1_m_32w_i_SG_GA_adj	SAB173	hitrtse	-199.402	-4.0231	hormone metabolite	16OH-DHEAS_1	DHEA: 16OH-DHEAS_1	DHEA	Androgen		Hit reaction time SE
cc.16OH_DHEAS_1_m_32w_i_SG_GA_adj	SAB173	hitrtse	-150.299	-4.0231	hormone metabolite	16OH-DHEAS_1	DHEA: 16OH-DHEAS_1	DHEA	Androgen		Hit reaction time SE
cc.16OH_DHEAS_1_m_32w_i_SG_GA_adj	SAB173	hitrtse	-161.306	-4.0231	hormone metabolite	16OH-DHEAS_1	DHEA: 16OH-DHEAS_1	DHEA	Androgen		Hit reaction time SE
cc.16OH_DHEAS_1_m_32w_i_SG_GA_adj	SAB174	hitrtse	-43.035	-0.601362	hormone metabolite	16OH-DHEAS_1	DHEA: 16OH-DHEAS_1	DHEA	Androgen		Hit reaction time SE
cc.16OH_DHEAS_1_m_32w_i_SG_GA_adj	SAB174	hitrtse	98.4305	-0.601362	hormone metabolite	16OH-DHEAS_1	DHEA: 16OH-DHEAS_1	DHEA	Androgen		Hit reaction time SE
cc.16OH_DHEAS_1_m_32w_i_SG_GA_adj	SAB174	hitrtse	206.423	-0.601362	hormone metabolite	16OH-DHEAS_1	DHEA: 16OH-DHEAS_1	DHEA	Androgen		Hit reaction time SE
cc.16OH_DHEAS_1_m_32w_i_SG_GA_adj	SAB175	hitrtse	-178.354	-4.45312	hormone metabolite	16OH-DHEAS_1	DHEA: 16OH-DHEAS_1	DHEA	Androgen		Hit reaction time SE
cc.16OH_DHEAS_1_m_32w_i_SG_GA_adj	SAB175	hitrtse	-105.542	-4.45312	hormone metabolite	16OH-DHEAS_1	DHEA: 16OH-DHEAS_1	DHEA	Androgen		Hit reaction time SE
cc.16OH_DHEAS_1_m_32w_i_SG_GA_adj	SAB175	hitrtse	1.98307	-4.45312	hormone metabolite	16OH-DHEAS_1	DHEA: 16OH-DHEAS_1	DHEA	Androgen		Hit reaction time SE
cc.16OH_DHEAS_1_m_32w_i_SG_GA_adj	SAB176	hitrtse	-29.7635	-0.322848	hormone metabolite	16OH-DHEAS_1	DHEA: 16OH-DHEAS_1	DHEA	Androgen		Hit reaction time SE
cc.16OH_DHEAS_1_m_32w_i_SG_GA_adj	SAB176	hitrtse	57.0754	-0.322848	hormone metabolite	16OH-DHEAS_1	DHEA: 16OH-DHEAS_1	DHEA	Androgen		Hit reaction time SE
cc.16OH_DHEAS_1_m_32w_i_SG_GA_adj	SAB178	hitrtse	-150.137	-3.9571	hormone metabolite	16OH-DHEAS_1	DHEA: 16OH-DHEAS_1	DHEA	Androgen		Hit reaction time SE
cc.16OH_DHEAS_1_m_32w_i_SG_GA_adj	SAB178	hitrtse	125.573	-3.9571	hormone metabolite	16OH-DHEAS_1	DHEA: 16OH-DHEAS_1	DHEA	Androgen		Hit reaction time SE
cc.16OH_DHEAS_1_m_32w_i_SG_GA_adj	SAB178	hitrtse	54.7649	-3.9571	hormone metabolite	16OH-DHEAS_1	DHEA: 16OH-DHEAS_1	DHEA	Androgen		Hit reaction time SE
cc.16OH_DHEAS_1_m_32w_i_SG_GA_adj	SAB178	hitrtse	37.325	-3.9571	hormone metabolite	16OH-DHEAS_1	DHEA: 16OH-DHEAS_1	DHEA	Androgen		Hit reaction time SE
cc.16OH_DHEAS_1_m_32w_i_SG_GA_adj	SAB18	hitrtse	128.986	-1.59702	hormone metabolite	16OH-DHEAS_1	DHEA: 16OH-DHEAS_1	DHEA	Androgen		Hit reaction time SE
cc.16OH_DHEAS_1_m_32w_i_SG_GA_adj	SAB18	hitrtse	-31.4984	-1.59702	hormone metabolite	16OH-DHEAS_1	DHEA: 16OH-DHEAS_1	DHEA	Androgen		Hit reaction time SE
cc.16OH_DHEAS_1_m_32w_i_SG_GA_adj	SAB18	hitrtse	-39.7487	-1.59702	hormone metabolite	16OH-DHEAS_1	DHEA: 16OH-DHEAS_1	DHEA	Androgen		Hit reaction time SE
cc.16OH_DHEAS_1_m_32w_i_SG_GA_adj	SAB180	hitrtse	-81.5507	-1.26326	hormone metabolite	16OH-DHEAS_1	DHEA: 16OH-DHEAS_1	DHEA	Androgen		Hit reaction time SE
cc.16OH_DHEAS_1_m_32w_i_SG_GA_adj	SAB180	hitrtse	60.8015	-1.26326	hormone metabolite	16OH-DHEAS_1	DHEA: 16OH-DHEAS_1	DHEA	Androgen		Hit reaction time SE
cc.16OH_DHEAS_1_m_32w_i_SG_GA_adj	SAB180	hitrtse	224.766	-1.26326	hormone metabolite	16OH-DHEAS_1	DHEA: 16OH-DHEAS_1	DHEA	Androgen		Hit reaction time SE
cc.16OH_DHEAS_1_m_32w_i_SG_GA_adj	SAB181	hitrtse	207.061	1.70692	hormone metabolite	16OH-DHEAS_1	DHEA: 16OH-DHEAS_1	DHEA	Androgen		Hit reaction time SE
cc.16OH_DHEAS_1_m_32w_i_SG_GA_adj	SAB181	hitrtse	-61.6178	1.70692	hormone metabolite	16OH-DHEAS_1	DHEA: 16OH-DHEAS_1	DHEA	Androgen		Hit reaction time SE
cc.16OH_DHEAS_1_m_32w_i_SG_GA_adj	SAB183	hitrtse	-101.864	-0.649647	hormone metabolite	16OH-DHEAS_1	DHEA: 16OH-DHEAS_1	DHEA	Androgen		Hit reaction time SE
cc.16OH_DHEAS_1_m_32w_i_SG_GA_adj	SAB183	hitrtse	119.143	-0.649647	hormone metabolite	16OH-DHEAS_1	DHEA: 16OH-DHEAS_1	DHEA	Androgen		Hit reaction time SE
cc.16OH_DHEAS_1_m_32w_i_SG_GA_adj	SAB184	hitrtse	77.3245	-0.087424	hormone metabolite	16OH-DHEAS_1	DHEA: 16OH-DHEAS_1	DHEA	Androgen		Hit reaction time SE
cc.16OH_DHEAS_1_m_32w_i_SG_GA_adj	SAB184	hitrtse	-111.768	-0.087424	hormone metabolite	16OH-DHEAS_1	DHEA: 16OH-DHEAS_1	DHEA	Androgen		Hit reaction time SE
cc.16OH_DHEAS_1_m_32w_i_SG_GA_adj	SAB184	hitrtse	-101.568	-0.087424	hormone metabolite	16OH-DHEAS_1	DHEA: 16OH-DHEAS_1	DHEA	Androgen		Hit reaction time SE
cc.16OH_DHEAS_1_m_32w_i_SG_GA_adj	SAB185	hitrtse	-89.3633	1.27565	hormone metabolite	16OH-DHEAS_1	DHEA: 16OH-DHEAS_1	DHEA	Androgen		Hit reaction time SE
cc.16OH_DHEAS_1_m_32w_i_SG_GA_adj	SAB185	hitrtse	1.00677	1.27565	hormone metabolite	16OH-DHEAS_1	DHEA: 16OH-DHEAS_1	DHEA	Androgen		Hit reaction time SE
cc.16OH_DHEAS_1_m_32w_i_SG_GA_adj	SAB185	hitrtse	-128.404	1.27565	hormone metabolite	16OH-DHEAS_1	DHEA: 16OH-DHEAS_1	DHEA	Androgen		Hit reaction time SE
cc.16OH_DHEAS_1_m_32w_i_SG_GA_adj	SAB186	hitrtse	-171.27	0.255632	hormone metabolite	16OH-DHEAS_1	DHEA: 16OH-DHEAS_1	DHEA	Androgen		Hit reaction time SE
cc.16OH_DHEAS_1_m_32w_i_SG_GA_adj	SAB186	hitrtse	174.14	0.255632	hormone metabolite	16OH-DHEAS_1	DHEA: 16OH-DHEAS_1	DHEA	Androgen		Hit reaction time SE
cc.16OH_DHEAS_1_m_32w_i_SG_GA_adj	SAB187	hitrtse	30.4	1.72598	hormone metabolite	16OH-DHEAS_1	DHEA: 16OH-DHEAS_1	DHEA	Androgen		Hit reaction time SE
cc.16OH_DHEAS_1_m_32w_i_SG_GA_adj	SAB187	hitrtse	148.477	1.72598	hormone metabolite	16OH-DHEAS_1	DHEA: 16OH-DHEAS_1	DHEA	Androgen		Hit reaction time SE
cc.16OH_DHEAS_1_m_32w_i_SG_GA_adj	SAB187	hitrtse	-42.8125	1.72598	hormone metabolite	16OH-DHEAS_1	DHEA: 16OH-DHEAS_1	DHEA	Androgen		Hit reaction time SE
cc.16OH_DHEAS_1_m_32w_i_SG_GA_adj	SAB188	hitrtse	95.325	-0.106543	hormone metabolite	16OH-DHEAS_1	DHEA: 16OH-DHEAS_1	DHEA	Androgen		Hit reaction time SE
cc.16OH_DHEAS_1_m_32w_i_SG_GA_adj	SAB188	hitrtse	137.973	-0.106543	hormone metabolite	16OH-DHEAS_1	DHEA: 16OH-DHEAS_1	DHEA	Androgen		Hit reaction time SE
cc.16OH_DHEAS_1_m_32w_i_SG_GA_adj	SAB189	hitrtse	-91.9971	-0.541022	hormone metabolite	16OH-DHEAS_1	DHEA: 16OH-DHEAS_1	DHEA	Androgen		Hit reaction time SE
cc.16OH_DHEAS_1_m_32w_i_SG_GA_adj	SAB189	hitrtse	-63.4838	-0.541022	hormone metabolite	16OH-DHEAS_1	DHEA: 16OH-DHEAS_1	DHEA	Androgen		Hit reaction time SE
cc.16OH_DHEAS_1_m_32w_i_SG_GA_adj	SAB189	hitrtse	-86.0613	-0.541022	hormone metabolite	16OH-DHEAS_1	DHEA: 16OH-DHEAS_1	DHEA	Androgen		Hit reaction time SE
cc.16OH_DHEAS_1_m_32w_i_SG_GA_adj	SAB189	hitrtse	66.1177	-0.541022	hormone metabolite	16OH-DHEAS_1	DHEA: 16OH-DHEAS_1	DHEA	Androgen		Hit reaction time SE
cc.16OH_DHEAS_1_m_32w_i_SG_GA_adj	SAB190	hitrtse	118.293	0.671083	hormone metabolite	16OH-DHEAS_1	DHEA: 16OH-DHEAS_1	DHEA	Androgen		Hit reaction time SE
cc.16OH_DHEAS_1_m_32w_i_SG_GA_adj	SAB190	hitrtse	190.685	0.671083	hormone metabolite	16OH-DHEAS_1	DHEA: 16OH-DHEAS_1	DHEA	Androgen		Hit reaction time SE
cc.16OH_DHEAS_1_m_32w_i_SG_GA_adj	SAB190	hitrtse	76.5803	0.671083	hormone metabolite	16OH-DHEAS_1	DHEA: 16OH-DHEAS_1	DHEA	Androgen		Hit reaction time SE
cc.16OH_DHEAS_1_m_32w_i_SG_GA_adj	SAB191	hitrtse	-152.65	0.263593	hormone metabolite	16OH-DHEAS_1	DHEA: 16OH-DHEAS_1	DHEA	Androgen		Hit reaction time SE
cc.16OH_DHEAS_1_m_32w_i_SG_GA_adj	SAB191	hitrtse	-0.6687	0.263593	hormone metabolite	16OH-DHEAS_1	DHEA: 16OH-DHEAS_1	DHEA	Androgen		Hit reaction time SE
cc.16OH_DHEAS_1_m_32w_i_SG_GA_adj	SAB191	hitrtse	-39.6623	0.263593	hormone metabolite	16OH-DHEAS_1	DHEA: 16OH-DHEAS_1	DHEA	Androgen		Hit reaction time SE
cc.16OH_DHEAS_1_m_32w_i_SG_GA_adj	SAB193	hitrtse	16.4677	0.82715	hormone metabolite	16OH-DHEAS_1	DHEA: 16OH-DHEAS_1	DHEA	Androgen		Hit reaction time SE
cc.16OH_DHEAS_1_m_32w_i_SG_GA_adj	SAB193	hitrtse	156.927	0.82715	hormone metabolite	16OH-DHEAS_1	DHEA: 16OH-DHEAS_1	DHEA	Androgen		Hit reaction time SE
cc.16OH_DHEAS_1_m_32w_i_SG_GA_adj	SAB194	hitrtse	-153.44	-1.28354	hormone metabolite	16OH-DHEAS_1	DHEA: 16OH-DHEAS_1	DHEA	Androgen		Hit reaction time SE
cc.16OH_DHEAS_1_m_32w_i_SG_GA_adj	SAB194	hitrtse	101	-1.28354	hormone metabolite	16OH-DHEAS_1	DHEA: 16OH-DHEAS_1	DHEA	Androgen		Hit reaction time SE
cc.16OH_DHEAS_1_m_32w_i_SG_GA_adj	SAB195	hitrtse	93.7989	0.274833	hormone metabolite	16OH-DHEAS_1	DHEA: 16OH-DHEAS_1	DHEA	Androgen		Hit reaction time SE
cc.16OH_DHEAS_1_m_32w_i_SG_GA_adj	SAB195	hitrtse	190.117	0.274833	hormone metabolite	16OH-DHEAS_1	DHEA: 16OH-DHEAS_1	DHEA	Androgen		Hit reaction time SE
cc.16OH_DHEAS_1_m_32w_i_SG_GA_adj	SAB195	hitrtse	7.79646	0.274833	hormone metabolite	16OH-DHEAS_1	DHEA: 16OH-DHEAS_1	DHEA	Androgen		Hit reaction time SE
cc.16OH_DHEAS_1_m_32w_i_SG_GA_adj	SAB196	hitrtse	94.309	-1.86287	hormone metabolite	16OH-DHEAS_1	DHEA: 16OH-DHEAS_1	DHEA	Androgen		Hit reaction time SE
cc.16OH_DHEAS_1_m_32w_i_SG_GA_adj	SAB196	hitrtse	-67.1738	-1.86287	hormone metabolite	16OH-DHEAS_1	DHEA: 16OH-DHEAS_1	DHEA	Androgen		Hit reaction time SE
cc.16OH_DHEAS_1_m_32w_i_SG_GA_adj	SAB196	hitrtse	-162.062	-1.86287	hormone metabolite	16OH-DHEAS_1	DHEA: 16OH-DHEAS_1	DHEA	Androgen		Hit reaction time SE
cc.16OH_DHEAS_1_m_32w_i_SG_GA_adj	SAB197	hitrtse	63.1385	-1.06561	hormone metabolite	16OH-DHEAS_1	DHEA: 16OH-DHEAS_1	DHEA	Androgen		Hit reaction time SE
cc.16OH_DHEAS_1_m_32w_i_SG_GA_adj	SAB197	hitrtse	-76.0497	-1.06561	hormone metabolite	16OH-DHEAS_1	DHEA: 16OH-DHEAS_1	DHEA	Androgen		Hit reaction time SE
cc.16OH_DHEAS_1_m_32w_i_SG_GA_adj	SAB197	hitrtse	102.112	-1.06561	hormone metabolite	16OH-DHEAS_1	DHEA: 16OH-DHEAS_1	DHEA	Androgen		Hit reaction time SE
cc.16OH_DHEAS_1_m_32w_i_SG_GA_adj	SAB197	hitrtse	-143.489	-1.06561	hormone metabolite	16OH-DHEAS_1	DHEA: 16OH-DHEAS_1	DHEA	Androgen		Hit reaction time SE
cc.16OH_DHEAS_1_m_32w_i_SG_GA_adj	SAB199	hitrtse	-68.7212	-0.959016	hormone metabolite	16OH-DHEAS_1	DHEA: 16OH-DHEAS_1	DHEA	Androgen		Hit reaction time SE
cc.16OH_DHEAS_1_m_32w_i_SG_GA_adj	SAB199	hitrtse	232.029	-0.959016	hormone metabolite	16OH-DHEAS_1	DHEA: 16OH-DHEAS_1	DHEA	Androgen		Hit reaction time SE
cc.16OH_DHEAS_1_m_32w_i_SG_GA_adj	SAB199	hitrtse	-0.77893	-0.959016	hormone metabolite	16OH-DHEAS_1	DHEA: 16OH-DHEAS_1	DHEA	Androgen		Hit reaction time SE
cc.16OH_DHEAS_1_m_32w_i_SG_GA_adj	SAB199	hitrtse	-115.006	-0.959016	hormone metabolite	16OH-DHEAS_1	DHEA: 16OH-DHEAS_1	DHEA	Androgen		Hit reaction time SE
cc.16OH_DHEAS_1_m_32w_i_SG_GA_adj	SAB2	hitrtse	-112.08	-0.912303	hormone metabolite	16OH-DHEAS_1	DHEA: 16OH-DHEAS_1	DHEA	Androgen		Hit reaction time SE
cc.16OH_DHEAS_1_m_32w_i_SG_GA_adj	SAB2	hitrtse	46.6675	-0.912303	hormone metabolite	16OH-DHEAS_1	DHEA: 16OH-DHEAS_1	DHEA	Androgen		Hit reaction time SE
cc.16OH_DHEAS_1_m_32w_i_SG_GA_adj	SAB20	hitrtse	-171.806	-0.263788	hormone metabolite	16OH-DHEAS_1	DHEA: 16OH-DHEAS_1	DHEA	Androgen		Hit reaction time SE
cc.16OH_DHEAS_1_m_32w_i_SG_GA_adj	SAB20	hitrtse	12.2917	-0.263788	hormone metabolite	16OH-DHEAS_1	DHEA: 16OH-DHEAS_1	DHEA	Androgen		Hit reaction time SE
cc.16OH_DHEAS_1_m_32w_i_SG_GA_adj	SAB20	hitrtse	-150.71	-0.263788	hormone metabolite	16OH-DHEAS_1	DHEA: 16OH-DHEAS_1	DHEA	Androgen		Hit reaction time SE
cc.16OH_DHEAS_1_m_32w_i_SG_GA_adj	SAB200	hitrtse	-133.558	-0.136399	hormone metabolite	16OH-DHEAS_1	DHEA: 16OH-DHEAS_1	DHEA	Androgen		Hit reaction time SE
cc.16OH_DHEAS_1_m_32w_i_SG_GA_adj	SAB200	hitrtse	88.9325	-0.136399	hormone metabolite	16OH-DHEAS_1	DHEA: 16OH-DHEAS_1	DHEA	Androgen		Hit reaction time SE
cc.16OH_DHEAS_1_m_32w_i_SG_GA_adj	SAB200	hitrtse	-127.216	-0.136399	hormone metabolite	16OH-DHEAS_1	DHEA: 16OH-DHEAS_1	DHEA	Androgen		Hit reaction time SE
cc.16OH_DHEAS_1_m_32w_i_SG_GA_adj	SAB200	hitrtse	-69.0594	-0.136399	hormone metabolite	16OH-DHEAS_1	DHEA: 16OH-DHEAS_1	DHEA	Androgen		Hit reaction time SE
cc.16OH_DHEAS_1_m_32w_i_SG_GA_adj	SAB202	hitrtse	143.844	-1.97354	hormone metabolite	16OH-DHEAS_1	DHEA: 16OH-DHEAS_1	DHEA	Androgen		Hit reaction time SE
cc.16OH_DHEAS_1_m_32w_i_SG_GA_adj	SAB202	hitrtse	-55.6352	-1.97354	hormone metabolite	16OH-DHEAS_1	DHEA: 16OH-DHEAS_1	DHEA	Androgen		Hit reaction time SE
cc.16OH_DHEAS_1_m_32w_i_SG_GA_adj	SAB202	hitrtse	12.3746	-1.97354	hormone metabolite	16OH-DHEAS_1	DHEA: 16OH-DHEAS_1	DHEA	Androgen		Hit reaction time SE
cc.16OH_DHEAS_1_m_32w_i_SG_GA_adj	SAB203	hitrtse	97.6933	0.519326	hormone metabolite	16OH-DHEAS_1	DHEA: 16OH-DHEAS_1	DHEA	Androgen		Hit reaction time SE
cc.16OH_DHEAS_1_m_32w_i_SG_GA_adj	SAB203	hitrtse	-34.4536	0.519326	hormone metabolite	16OH-DHEAS_1	DHEA: 16OH-DHEAS_1	DHEA	Androgen		Hit reaction time SE
cc.16OH_DHEAS_1_m_32w_i_SG_GA_adj	SAB203	hitrtse	-73.505	0.519326	hormone metabolite	16OH-DHEAS_1	DHEA: 16OH-DHEAS_1	DHEA	Androgen		Hit reaction time SE
cc.16OH_DHEAS_1_m_32w_i_SG_GA_adj	SAB204	hitrtse	-165.029	-0.595875	hormone metabolite	16OH-DHEAS_1	DHEA: 16OH-DHEAS_1	DHEA	Androgen		Hit reaction time SE
cc.16OH_DHEAS_1_m_32w_i_SG_GA_adj	SAB204	hitrtse	170.474	-0.595875	hormone metabolite	16OH-DHEAS_1	DHEA: 16OH-DHEAS_1	DHEA	Androgen		Hit reaction time SE
cc.16OH_DHEAS_1_m_32w_i_SG_GA_adj	SAB205	hitrtse	156.804	-1.57565	hormone metabolite	16OH-DHEAS_1	DHEA: 16OH-DHEAS_1	DHEA	Androgen		Hit reaction time SE
cc.16OH_DHEAS_1_m_32w_i_SG_GA_adj	SAB205	hitrtse	52.3832	-1.57565	hormone metabolite	16OH-DHEAS_1	DHEA: 16OH-DHEAS_1	DHEA	Androgen		Hit reaction time SE
cc.16OH_DHEAS_1_m_32w_i_SG_GA_adj	SAB205	hitrtse	106.205	-1.57565	hormone metabolite	16OH-DHEAS_1	DHEA: 16OH-DHEAS_1	DHEA	Androgen		Hit reaction time SE
cc.16OH_DHEAS_1_m_32w_i_SG_GA_adj	SAB207	hitrtse	113.957	-1.27039	hormone metabolite	16OH-DHEAS_1	DHEA: 16OH-DHEAS_1	DHEA	Androgen		Hit reaction time SE
cc.16OH_DHEAS_1_m_32w_i_SG_GA_adj	SAB207	hitrtse	-11.3731	-1.27039	hormone metabolite	16OH-DHEAS_1	DHEA: 16OH-DHEAS_1	DHEA	Androgen		Hit reaction time SE
cc.16OH_DHEAS_1_m_32w_i_SG_GA_adj	SAB209	hitrtse	-134.472	-1.27739	hormone metabolite	16OH-DHEAS_1	DHEA: 16OH-DHEAS_1	DHEA	Androgen		Hit reaction time SE
cc.16OH_DHEAS_1_m_32w_i_SG_GA_adj	SAB209	hitrtse	28.1609	-1.27739	hormone metabolite	16OH-DHEAS_1	DHEA: 16OH-DHEAS_1	DHEA	Androgen		Hit reaction time SE
cc.16OH_DHEAS_1_m_32w_i_SG_GA_adj	SAB209	hitrtse	40.0777	-1.27739	hormone metabolite	16OH-DHEAS_1	DHEA: 16OH-DHEAS_1	DHEA	Androgen		Hit reaction time SE
cc.16OH_DHEAS_1_m_32w_i_SG_GA_adj	SAB21	hitrtse	50.4575	0.338601	hormone metabolite	16OH-DHEAS_1	DHEA: 16OH-DHEAS_1	DHEA	Androgen		Hit reaction time SE
cc.16OH_DHEAS_1_m_32w_i_SG_GA_adj	SAB21	hitrtse	5.35632	0.338601	hormone metabolite	16OH-DHEAS_1	DHEA: 16OH-DHEAS_1	DHEA	Androgen		Hit reaction time SE
cc.16OH_DHEAS_1_m_32w_i_SG_GA_adj	SAB21	hitrtse	75.932	0.338601	hormone metabolite	16OH-DHEAS_1	DHEA: 16OH-DHEAS_1	DHEA	Androgen		Hit reaction time SE
cc.16OH_DHEAS_1_m_32w_i_SG_GA_adj	SAB211	hitrtse	200.415	0.120186	hormone metabolite	16OH-DHEAS_1	DHEA: 16OH-DHEAS_1	DHEA	Androgen		Hit reaction time SE
cc.16OH_DHEAS_1_m_32w_i_SG_GA_adj	SAB211	hitrtse	-131.984	0.120186	hormone metabolite	16OH-DHEAS_1	DHEA: 16OH-DHEAS_1	DHEA	Androgen		Hit reaction time SE
cc.16OH_DHEAS_1_m_32w_i_SG_GA_adj	SAB211	hitrtse	-151.189	0.120186	hormone metabolite	16OH-DHEAS_1	DHEA: 16OH-DHEAS_1	DHEA	Androgen		Hit reaction time SE
cc.16OH_DHEAS_1_m_32w_i_SG_GA_adj	SAB211	hitrtse	-132.171	0.120186	hormone metabolite	16OH-DHEAS_1	DHEA: 16OH-DHEAS_1	DHEA	Androgen		Hit reaction time SE
cc.16OH_DHEAS_1_m_32w_i_SG_GA_adj	SAB212	hitrtse	10.5846	-3.21727	hormone metabolite	16OH-DHEAS_1	DHEA: 16OH-DHEAS_1	DHEA	Androgen		Hit reaction time SE
cc.16OH_DHEAS_1_m_32w_i_SG_GA_adj	SAB212	hitrtse	131.335	-3.21727	hormone metabolite	16OH-DHEAS_1	DHEA: 16OH-DHEAS_1	DHEA	Androgen		Hit reaction time SE
cc.16OH_DHEAS_1_m_32w_i_SG_GA_adj	SAB212	hitrtse	-171.394	-3.21727	hormone metabolite	16OH-DHEAS_1	DHEA: 16OH-DHEAS_1	DHEA	Androgen		Hit reaction time SE
cc.16OH_DHEAS_1_m_32w_i_SG_GA_adj	SAB212	hitrtse	-40.6892	-3.21727	hormone metabolite	16OH-DHEAS_1	DHEA: 16OH-DHEAS_1	DHEA	Androgen		Hit reaction time SE
cc.16OH_DHEAS_1_m_32w_i_SG_GA_adj	SAB215	hitrtse	118.791	0.0588075	hormone metabolite	16OH-DHEAS_1	DHEA: 16OH-DHEAS_1	DHEA	Androgen		Hit reaction time SE
cc.16OH_DHEAS_1_m_32w_i_SG_GA_adj	SAB215	hitrtse	-39.7447	0.0588075	hormone metabolite	16OH-DHEAS_1	DHEA: 16OH-DHEAS_1	DHEA	Androgen		Hit reaction time SE
cc.16OH_DHEAS_1_m_32w_i_SG_GA_adj	SAB215	hitrtse	-102.623	0.0588075	hormone metabolite	16OH-DHEAS_1	DHEA: 16OH-DHEAS_1	DHEA	Androgen		Hit reaction time SE
cc.16OH_DHEAS_1_m_32w_i_SG_GA_adj	SAB215	hitrtse	-155.075	0.0588075	hormone metabolite	16OH-DHEAS_1	DHEA: 16OH-DHEAS_1	DHEA	Androgen		Hit reaction time SE
cc.16OH_DHEAS_1_m_32w_i_SG_GA_adj	SAB216	hitrtse	-126.605	0.452615	hormone metabolite	16OH-DHEAS_1	DHEA: 16OH-DHEAS_1	DHEA	Androgen		Hit reaction time SE
cc.16OH_DHEAS_1_m_32w_i_SG_GA_adj	SAB216	hitrtse	-108.909	0.452615	hormone metabolite	16OH-DHEAS_1	DHEA: 16OH-DHEAS_1	DHEA	Androgen		Hit reaction time SE
cc.16OH_DHEAS_1_m_32w_i_SG_GA_adj	SAB216	hitrtse	57.1077	0.452615	hormone metabolite	16OH-DHEAS_1	DHEA: 16OH-DHEAS_1	DHEA	Androgen		Hit reaction time SE
cc.16OH_DHEAS_1_m_32w_i_SG_GA_adj	SAB217	hitrtse	40.2423	-1.64487	hormone metabolite	16OH-DHEAS_1	DHEA: 16OH-DHEAS_1	DHEA	Androgen		Hit reaction time SE
cc.16OH_DHEAS_1_m_32w_i_SG_GA_adj	SAB217	hitrtse	-0.205499	-1.64487	hormone metabolite	16OH-DHEAS_1	DHEA: 16OH-DHEAS_1	DHEA	Androgen		Hit reaction time SE
cc.16OH_DHEAS_1_m_32w_i_SG_GA_adj	SAB217	hitrtse	-113.903	-1.64487	hormone metabolite	16OH-DHEAS_1	DHEA: 16OH-DHEAS_1	DHEA	Androgen		Hit reaction time SE
cc.16OH_DHEAS_1_m_32w_i_SG_GA_adj	SAB218	hitrtse	-68.0486	0.848039	hormone metabolite	16OH-DHEAS_1	DHEA: 16OH-DHEAS_1	DHEA	Androgen		Hit reaction time SE
cc.16OH_DHEAS_1_m_32w_i_SG_GA_adj	SAB219	hitrtse	-83.144	0.814492	hormone metabolite	16OH-DHEAS_1	DHEA: 16OH-DHEAS_1	DHEA	Androgen		Hit reaction time SE
cc.16OH_DHEAS_1_m_32w_i_SG_GA_adj	SAB219	hitrtse	-49.7551	0.814492	hormone metabolite	16OH-DHEAS_1	DHEA: 16OH-DHEAS_1	DHEA	Androgen		Hit reaction time SE
cc.16OH_DHEAS_1_m_32w_i_SG_GA_adj	SAB219	hitrtse	16.2068	0.814492	hormone metabolite	16OH-DHEAS_1	DHEA: 16OH-DHEAS_1	DHEA	Androgen		Hit reaction time SE
cc.16OH_DHEAS_1_m_32w_i_SG_GA_adj	SAB219	hitrtse	-124.657	0.814492	hormone metabolite	16OH-DHEAS_1	DHEA: 16OH-DHEAS_1	DHEA	Androgen		Hit reaction time SE
cc.16OH_DHEAS_1_m_32w_i_SG_GA_adj	SAB22	hitrtse	-54.6714	-0.525137	hormone metabolite	16OH-DHEAS_1	DHEA: 16OH-DHEAS_1	DHEA	Androgen		Hit reaction time SE
cc.16OH_DHEAS_1_m_32w_i_SG_GA_adj	SAB22	hitrtse	29.6743	-0.525137	hormone metabolite	16OH-DHEAS_1	DHEA: 16OH-DHEAS_1	DHEA	Androgen		Hit reaction time SE
cc.16OH_DHEAS_1_m_32w_i_SG_GA_adj	SAB22	hitrtse	-28.0811	-0.525137	hormone metabolite	16OH-DHEAS_1	DHEA: 16OH-DHEAS_1	DHEA	Androgen		Hit reaction time SE
cc.16OH_DHEAS_1_m_32w_i_SG_GA_adj	SAB220	hitrtse	-0.694704	-0.619049	hormone metabolite	16OH-DHEAS_1	DHEA: 16OH-DHEAS_1	DHEA	Androgen		Hit reaction time SE
cc.16OH_DHEAS_1_m_32w_i_SG_GA_adj	SAB220	hitrtse	-5.3126	-0.619049	hormone metabolite	16OH-DHEAS_1	DHEA: 16OH-DHEAS_1	DHEA	Androgen		Hit reaction time SE
cc.16OH_DHEAS_1_m_32w_i_SG_GA_adj	SAB222	hitrtse	-28.9643	1.10466	hormone metabolite	16OH-DHEAS_1	DHEA: 16OH-DHEAS_1	DHEA	Androgen		Hit reaction time SE
cc.16OH_DHEAS_1_m_32w_i_SG_GA_adj	SAB222	hitrtse	-31.7284	1.10466	hormone metabolite	16OH-DHEAS_1	DHEA: 16OH-DHEAS_1	DHEA	Androgen		Hit reaction time SE
cc.16OH_DHEAS_1_m_32w_i_SG_GA_adj	SAB222	hitrtse	59.7607	1.10466	hormone metabolite	16OH-DHEAS_1	DHEA: 16OH-DHEAS_1	DHEA	Androgen		Hit reaction time SE
cc.16OH_DHEAS_1_m_32w_i_SG_GA_adj	SAB223	hitrtse	115.064	-0.00698574	hormone metabolite	16OH-DHEAS_1	DHEA: 16OH-DHEAS_1	DHEA	Androgen		Hit reaction time SE
cc.16OH_DHEAS_1_m_32w_i_SG_GA_adj	SAB223	hitrtse	-139.439	-0.00698574	hormone metabolite	16OH-DHEAS_1	DHEA: 16OH-DHEAS_1	DHEA	Androgen		Hit reaction time SE
cc.16OH_DHEAS_1_m_32w_i_SG_GA_adj	SAB223	hitrtse	9.06017	-0.00698574	hormone metabolite	16OH-DHEAS_1	DHEA: 16OH-DHEAS_1	DHEA	Androgen		Hit reaction time SE
cc.16OH_DHEAS_1_m_32w_i_SG_GA_adj	SAB224	hitrtse	-77.0627	1.63111	hormone metabolite	16OH-DHEAS_1	DHEA: 16OH-DHEAS_1	DHEA	Androgen		Hit reaction time SE
cc.16OH_DHEAS_1_m_32w_i_SG_GA_adj	SAB224	hitrtse	52.4089	1.63111	hormone metabolite	16OH-DHEAS_1	DHEA: 16OH-DHEAS_1	DHEA	Androgen		Hit reaction time SE
cc.16OH_DHEAS_1_m_32w_i_SG_GA_adj	SAB224	hitrtse	-43.5554	1.63111	hormone metabolite	16OH-DHEAS_1	DHEA: 16OH-DHEAS_1	DHEA	Androgen		Hit reaction time SE
cc.16OH_DHEAS_1_m_32w_i_SG_GA_adj	SAB225	hitrtse	-53.9157	1.39524	hormone metabolite	16OH-DHEAS_1	DHEA: 16OH-DHEAS_1	DHEA	Androgen		Hit reaction time SE
cc.16OH_DHEAS_1_m_32w_i_SG_GA_adj	SAB225	hitrtse	-163.241	1.39524	hormone metabolite	16OH-DHEAS_1	DHEA: 16OH-DHEAS_1	DHEA	Androgen		Hit reaction time SE
cc.16OH_DHEAS_1_m_32w_i_SG_GA_adj	SAB225	hitrtse	-152.917	1.39524	hormone metabolite	16OH-DHEAS_1	DHEA: 16OH-DHEAS_1	DHEA	Androgen		Hit reaction time SE
cc.16OH_DHEAS_1_m_32w_i_SG_GA_adj	SAB227	hitrtse	-116.506	0.981617	hormone metabolite	16OH-DHEAS_1	DHEA: 16OH-DHEAS_1	DHEA	Androgen		Hit reaction time SE
cc.16OH_DHEAS_1_m_32w_i_SG_GA_adj	SAB227	hitrtse	-53.7059	0.981617	hormone metabolite	16OH-DHEAS_1	DHEA: 16OH-DHEAS_1	DHEA	Androgen		Hit reaction time SE
cc.16OH_DHEAS_1_m_32w_i_SG_GA_adj	SAB227	hitrtse	25.3677	0.981617	hormone metabolite	16OH-DHEAS_1	DHEA: 16OH-DHEAS_1	DHEA	Androgen		Hit reaction time SE
cc.16OH_DHEAS_1_m_32w_i_SG_GA_adj	SAB228	hitrtse	87.4754	-0.0597079	hormone metabolite	16OH-DHEAS_1	DHEA: 16OH-DHEAS_1	DHEA	Androgen		Hit reaction time SE
cc.16OH_DHEAS_1_m_32w_i_SG_GA_adj	SAB228	hitrtse	16.6507	-0.0597079	hormone metabolite	16OH-DHEAS_1	DHEA: 16OH-DHEAS_1	DHEA	Androgen		Hit reaction time SE
cc.16OH_DHEAS_1_m_32w_i_SG_GA_adj	SAB228	hitrtse	-163.772	-0.0597079	hormone metabolite	16OH-DHEAS_1	DHEA: 16OH-DHEAS_1	DHEA	Androgen		Hit reaction time SE
cc.16OH_DHEAS_1_m_32w_i_SG_GA_adj	SAB23	hitrtse	-131.447	0.0347954	hormone metabolite	16OH-DHEAS_1	DHEA: 16OH-DHEAS_1	DHEA	Androgen		Hit reaction time SE
cc.16OH_DHEAS_1_m_32w_i_SG_GA_adj	SAB23	hitrtse	-144.066	0.0347954	hormone metabolite	16OH-DHEAS_1	DHEA: 16OH-DHEAS_1	DHEA	Androgen		Hit reaction time SE
cc.16OH_DHEAS_1_m_32w_i_SG_GA_adj	SAB23	hitrtse	-16.4664	0.0347954	hormone metabolite	16OH-DHEAS_1	DHEA: 16OH-DHEAS_1	DHEA	Androgen		Hit reaction time SE
cc.16OH_DHEAS_1_m_32w_i_SG_GA_adj	SAB230	hitrtse	16.7585	-0.258736	hormone metabolite	16OH-DHEAS_1	DHEA: 16OH-DHEAS_1	DHEA	Androgen		Hit reaction time SE
cc.16OH_DHEAS_1_m_32w_i_SG_GA_adj	SAB230	hitrtse	1.75723	-0.258736	hormone metabolite	16OH-DHEAS_1	DHEA: 16OH-DHEAS_1	DHEA	Androgen		Hit reaction time SE
cc.16OH_DHEAS_1_m_32w_i_SG_GA_adj	SAB230	hitrtse	-122.731	-0.258736	hormone metabolite	16OH-DHEAS_1	DHEA: 16OH-DHEAS_1	DHEA	Androgen		Hit reaction time SE
cc.16OH_DHEAS_1_m_32w_i_SG_GA_adj	SAB230	hitrtse	280.423	-0.258736	hormone metabolite	16OH-DHEAS_1	DHEA: 16OH-DHEAS_1	DHEA	Androgen		Hit reaction time SE
cc.16OH_DHEAS_1_m_32w_i_SG_GA_adj	SAB231	hitrtse	172.305	-2.3282	hormone metabolite	16OH-DHEAS_1	DHEA: 16OH-DHEAS_1	DHEA	Androgen		Hit reaction time SE
cc.16OH_DHEAS_1_m_32w_i_SG_GA_adj	SAB231	hitrtse	50.3521	-2.3282	hormone metabolite	16OH-DHEAS_1	DHEA: 16OH-DHEAS_1	DHEA	Androgen		Hit reaction time SE
cc.16OH_DHEAS_1_m_32w_i_SG_GA_adj	SAB231	hitrtse	-140.932	-2.3282	hormone metabolite	16OH-DHEAS_1	DHEA: 16OH-DHEAS_1	DHEA	Androgen		Hit reaction time SE
cc.16OH_DHEAS_1_m_32w_i_SG_GA_adj	SAB231	hitrtse	-140.522	-2.3282	hormone metabolite	16OH-DHEAS_1	DHEA: 16OH-DHEAS_1	DHEA	Androgen		Hit reaction time SE
cc.16OH_DHEAS_1_m_32w_i_SG_GA_adj	SAB232	hitrtse	-98.7397	-0.848038	hormone metabolite	16OH-DHEAS_1	DHEA: 16OH-DHEAS_1	DHEA	Androgen		Hit reaction time SE
cc.16OH_DHEAS_1_m_32w_i_SG_GA_adj	SAB232	hitrtse	145.248	-0.848038	hormone metabolite	16OH-DHEAS_1	DHEA: 16OH-DHEAS_1	DHEA	Androgen		Hit reaction time SE
cc.16OH_DHEAS_1_m_32w_i_SG_GA_adj	SAB232	hitrtse	128.206	-0.848038	hormone metabolite	16OH-DHEAS_1	DHEA: 16OH-DHEAS_1	DHEA	Androgen		Hit reaction time SE
cc.16OH_DHEAS_1_m_32w_i_SG_GA_adj	SAB235	hitrtse	-117.709	-1.30734	hormone metabolite	16OH-DHEAS_1	DHEA: 16OH-DHEAS_1	DHEA	Androgen		Hit reaction time SE
cc.16OH_DHEAS_1_m_32w_i_SG_GA_adj	SAB235	hitrtse	150.123	-1.30734	hormone metabolite	16OH-DHEAS_1	DHEA: 16OH-DHEAS_1	DHEA	Androgen		Hit reaction time SE
cc.16OH_DHEAS_1_m_32w_i_SG_GA_adj	SAB235	hitrtse	11.3837	-1.30734	hormone metabolite	16OH-DHEAS_1	DHEA: 16OH-DHEAS_1	DHEA	Androgen		Hit reaction time SE
cc.16OH_DHEAS_1_m_32w_i_SG_GA_adj	SAB235	hitrtse	205.157	-1.30734	hormone metabolite	16OH-DHEAS_1	DHEA: 16OH-DHEAS_1	DHEA	Androgen		Hit reaction time SE
cc.16OH_DHEAS_1_m_32w_i_SG_GA_adj	SAB237	hitrtse	90.5424	-3.02476	hormone metabolite	16OH-DHEAS_1	DHEA: 16OH-DHEAS_1	DHEA	Androgen		Hit reaction time SE
cc.16OH_DHEAS_1_m_32w_i_SG_GA_adj	SAB237	hitrtse	-156.557	-3.02476	hormone metabolite	16OH-DHEAS_1	DHEA: 16OH-DHEAS_1	DHEA	Androgen		Hit reaction time SE
cc.16OH_DHEAS_1_m_32w_i_SG_GA_adj	SAB237	hitrtse	-86.5308	-3.02476	hormone metabolite	16OH-DHEAS_1	DHEA: 16OH-DHEAS_1	DHEA	Androgen		Hit reaction time SE
cc.16OH_DHEAS_1_m_32w_i_SG_GA_adj	SAB237	hitrtse	11.8948	-3.02476	hormone metabolite	16OH-DHEAS_1	DHEA: 16OH-DHEAS_1	DHEA	Androgen		Hit reaction time SE
cc.16OH_DHEAS_1_m_32w_i_SG_GA_adj	SAB241	hitrtse	-157.773	0.241932	hormone metabolite	16OH-DHEAS_1	DHEA: 16OH-DHEAS_1	DHEA	Androgen		Hit reaction time SE
cc.16OH_DHEAS_1_m_32w_i_SG_GA_adj	SAB241	hitrtse	-82.4743	0.241932	hormone metabolite	16OH-DHEAS_1	DHEA: 16OH-DHEAS_1	DHEA	Androgen		Hit reaction time SE
cc.16OH_DHEAS_1_m_32w_i_SG_GA_adj	SAB241	hitrtse	-100.976	0.241932	hormone metabolite	16OH-DHEAS_1	DHEA: 16OH-DHEAS_1	DHEA	Androgen		Hit reaction time SE
cc.16OH_DHEAS_1_m_32w_i_SG_GA_adj	SAB241	hitrtse	31.0452	0.241932	hormone metabolite	16OH-DHEAS_1	DHEA: 16OH-DHEAS_1	DHEA	Androgen		Hit reaction time SE
cc.16OH_DHEAS_1_m_32w_i_SG_GA_adj	SAB242	hitrtse	-29.9322	1.8506	hormone metabolite	16OH-DHEAS_1	DHEA: 16OH-DHEAS_1	DHEA	Androgen		Hit reaction time SE
cc.16OH_DHEAS_1_m_32w_i_SG_GA_adj	SAB242	hitrtse	62.1165	1.8506	hormone metabolite	16OH-DHEAS_1	DHEA: 16OH-DHEAS_1	DHEA	Androgen		Hit reaction time SE
cc.16OH_DHEAS_1_m_32w_i_SG_GA_adj	SAB242	hitrtse	121.041	1.8506	hormone metabolite	16OH-DHEAS_1	DHEA: 16OH-DHEAS_1	DHEA	Androgen		Hit reaction time SE
cc.16OH_DHEAS_1_m_32w_i_SG_GA_adj	SAB243	hitrtse	26.3947	0.236688	hormone metabolite	16OH-DHEAS_1	DHEA: 16OH-DHEAS_1	DHEA	Androgen		Hit reaction time SE
cc.16OH_DHEAS_1_m_32w_i_SG_GA_adj	SAB243	hitrtse	-9.07581	0.236688	hormone metabolite	16OH-DHEAS_1	DHEA: 16OH-DHEAS_1	DHEA	Androgen		Hit reaction time SE
cc.16OH_DHEAS_1_m_32w_i_SG_GA_adj	SAB243	hitrtse	184.833	0.236688	hormone metabolite	16OH-DHEAS_1	DHEA: 16OH-DHEAS_1	DHEA	Androgen		Hit reaction time SE
cc.16OH_DHEAS_1_m_32w_i_SG_GA_adj	SAB244	hitrtse	186.388	0.519857	hormone metabolite	16OH-DHEAS_1	DHEA: 16OH-DHEAS_1	DHEA	Androgen		Hit reaction time SE
cc.16OH_DHEAS_1_m_32w_i_SG_GA_adj	SAB244	hitrtse	20.0127	0.519857	hormone metabolite	16OH-DHEAS_1	DHEA: 16OH-DHEAS_1	DHEA	Androgen		Hit reaction time SE
cc.16OH_DHEAS_1_m_32w_i_SG_GA_adj	SAB244	hitrtse	-70.5393	0.519857	hormone metabolite	16OH-DHEAS_1	DHEA: 16OH-DHEAS_1	DHEA	Androgen		Hit reaction time SE
cc.16OH_DHEAS_1_m_32w_i_SG_GA_adj	SAB244	hitrtse	-139.175	0.519857	hormone metabolite	16OH-DHEAS_1	DHEA: 16OH-DHEAS_1	DHEA	Androgen		Hit reaction time SE
cc.16OH_DHEAS_1_m_32w_i_SG_GA_adj	SAB245	hitrtse	60.8037	-0.881399	hormone metabolite	16OH-DHEAS_1	DHEA: 16OH-DHEAS_1	DHEA	Androgen		Hit reaction time SE
cc.16OH_DHEAS_1_m_32w_i_SG_GA_adj	SAB245	hitrtse	-145.014	-0.881399	hormone metabolite	16OH-DHEAS_1	DHEA: 16OH-DHEAS_1	DHEA	Androgen		Hit reaction time SE
cc.16OH_DHEAS_1_m_32w_i_SG_GA_adj	SAB246	hitrtse	-125.848	0.616646	hormone metabolite	16OH-DHEAS_1	DHEA: 16OH-DHEAS_1	DHEA	Androgen		Hit reaction time SE
cc.16OH_DHEAS_1_m_32w_i_SG_GA_adj	SAB246	hitrtse	-128.645	0.616646	hormone metabolite	16OH-DHEAS_1	DHEA: 16OH-DHEAS_1	DHEA	Androgen		Hit reaction time SE
cc.16OH_DHEAS_1_m_32w_i_SG_GA_adj	SAB246	hitrtse	76.0264	0.616646	hormone metabolite	16OH-DHEAS_1	DHEA: 16OH-DHEAS_1	DHEA	Androgen		Hit reaction time SE
cc.16OH_DHEAS_1_m_32w_i_SG_GA_adj	SAB246	hitrtse	224.493	0.616646	hormone metabolite	16OH-DHEAS_1	DHEA: 16OH-DHEAS_1	DHEA	Androgen		Hit reaction time SE
cc.16OH_DHEAS_1_m_32w_i_SG_GA_adj	SAB247	hitrtse	82.6707	-1.39872	hormone metabolite	16OH-DHEAS_1	DHEA: 16OH-DHEAS_1	DHEA	Androgen		Hit reaction time SE
cc.16OH_DHEAS_1_m_32w_i_SG_GA_adj	SAB247	hitrtse	-114.605	-1.39872	hormone metabolite	16OH-DHEAS_1	DHEA: 16OH-DHEAS_1	DHEA	Androgen		Hit reaction time SE
cc.16OH_DHEAS_1_m_32w_i_SG_GA_adj	SAB247	hitrtse	86.1706	-1.39872	hormone metabolite	16OH-DHEAS_1	DHEA: 16OH-DHEAS_1	DHEA	Androgen		Hit reaction time SE
cc.16OH_DHEAS_1_m_32w_i_SG_GA_adj	SAB247	hitrtse	139.533	-1.39872	hormone metabolite	16OH-DHEAS_1	DHEA: 16OH-DHEAS_1	DHEA	Androgen		Hit reaction time SE
cc.16OH_DHEAS_1_m_32w_i_SG_GA_adj	SAB250	hitrtse	-177.622	0.324513	hormone metabolite	16OH-DHEAS_1	DHEA: 16OH-DHEAS_1	DHEA	Androgen		Hit reaction time SE
cc.16OH_DHEAS_1_m_32w_i_SG_GA_adj	SAB250	hitrtse	-29.247	0.324513	hormone metabolite	16OH-DHEAS_1	DHEA: 16OH-DHEAS_1	DHEA	Androgen		Hit reaction time SE
cc.16OH_DHEAS_1_m_32w_i_SG_GA_adj	SAB250	hitrtse	52.6924	0.324513	hormone metabolite	16OH-DHEAS_1	DHEA: 16OH-DHEAS_1	DHEA	Androgen		Hit reaction time SE
cc.16OH_DHEAS_1_m_32w_i_SG_GA_adj	SAB251	hitrtse	-128.273	-0.301694	hormone metabolite	16OH-DHEAS_1	DHEA: 16OH-DHEAS_1	DHEA	Androgen		Hit reaction time SE
cc.16OH_DHEAS_1_m_32w_i_SG_GA_adj	SAB251	hitrtse	78.4677	-0.301694	hormone metabolite	16OH-DHEAS_1	DHEA: 16OH-DHEAS_1	DHEA	Androgen		Hit reaction time SE
cc.16OH_DHEAS_1_m_32w_i_SG_GA_adj	SAB251	hitrtse	-94.0989	-0.301694	hormone metabolite	16OH-DHEAS_1	DHEA: 16OH-DHEAS_1	DHEA	Androgen		Hit reaction time SE
cc.16OH_DHEAS_1_m_32w_i_SG_GA_adj	SAB252	hitrtse	-12.7552	-0.106882	hormone metabolite	16OH-DHEAS_1	DHEA: 16OH-DHEAS_1	DHEA	Androgen		Hit reaction time SE
cc.16OH_DHEAS_1_m_32w_i_SG_GA_adj	SAB252	hitrtse	281.74	-0.106882	hormone metabolite	16OH-DHEAS_1	DHEA: 16OH-DHEAS_1	DHEA	Androgen		Hit reaction time SE
cc.16OH_DHEAS_1_m_32w_i_SG_GA_adj	SAB252	hitrtse	112.998	-0.106882	hormone metabolite	16OH-DHEAS_1	DHEA: 16OH-DHEAS_1	DHEA	Androgen		Hit reaction time SE
cc.16OH_DHEAS_1_m_32w_i_SG_GA_adj	SAB253	hitrtse	63.2006	0.720336	hormone metabolite	16OH-DHEAS_1	DHEA: 16OH-DHEAS_1	DHEA	Androgen		Hit reaction time SE
cc.16OH_DHEAS_1_m_32w_i_SG_GA_adj	SAB253	hitrtse	67.6955	0.720336	hormone metabolite	16OH-DHEAS_1	DHEA: 16OH-DHEAS_1	DHEA	Androgen		Hit reaction time SE
cc.16OH_DHEAS_1_m_32w_i_SG_GA_adj	SAB253	hitrtse	-58.463	0.720336	hormone metabolite	16OH-DHEAS_1	DHEA: 16OH-DHEAS_1	DHEA	Androgen		Hit reaction time SE
cc.16OH_DHEAS_1_m_32w_i_SG_GA_adj	SAB253	hitrtse	-131.113	0.720336	hormone metabolite	16OH-DHEAS_1	DHEA: 16OH-DHEAS_1	DHEA	Androgen		Hit reaction time SE
cc.16OH_DHEAS_1_m_32w_i_SG_GA_adj	SAB254	hitrtse	-125.891	-0.494671	hormone metabolite	16OH-DHEAS_1	DHEA: 16OH-DHEAS_1	DHEA	Androgen		Hit reaction time SE
cc.16OH_DHEAS_1_m_32w_i_SG_GA_adj	SAB254	hitrtse	-64.8908	-0.494671	hormone metabolite	16OH-DHEAS_1	DHEA: 16OH-DHEAS_1	DHEA	Androgen		Hit reaction time SE
cc.16OH_DHEAS_1_m_32w_i_SG_GA_adj	SAB254	hitrtse	-81.3388	-0.494671	hormone metabolite	16OH-DHEAS_1	DHEA: 16OH-DHEAS_1	DHEA	Androgen		Hit reaction time SE
cc.16OH_DHEAS_1_m_32w_i_SG_GA_adj	SAB254	hitrtse	84.3784	-0.494671	hormone metabolite	16OH-DHEAS_1	DHEA: 16OH-DHEAS_1	DHEA	Androgen		Hit reaction time SE
cc.16OH_DHEAS_1_m_32w_i_SG_GA_adj	SAB255	hitrtse	-133.665	-1.5675	hormone metabolite	16OH-DHEAS_1	DHEA: 16OH-DHEAS_1	DHEA	Androgen		Hit reaction time SE
cc.16OH_DHEAS_1_m_32w_i_SG_GA_adj	SAB256	hitrtse	-20.5429	-1.49773	hormone metabolite	16OH-DHEAS_1	DHEA: 16OH-DHEAS_1	DHEA	Androgen		Hit reaction time SE
cc.16OH_DHEAS_1_m_32w_i_SG_GA_adj	SAB256	hitrtse	-122.55	-1.49773	hormone metabolite	16OH-DHEAS_1	DHEA: 16OH-DHEAS_1	DHEA	Androgen		Hit reaction time SE
cc.16OH_DHEAS_1_m_32w_i_SG_GA_adj	SAB256	hitrtse	-71.044	-1.49773	hormone metabolite	16OH-DHEAS_1	DHEA: 16OH-DHEAS_1	DHEA	Androgen		Hit reaction time SE
cc.16OH_DHEAS_1_m_32w_i_SG_GA_adj	SAB256	hitrtse	12.7693	-1.49773	hormone metabolite	16OH-DHEAS_1	DHEA: 16OH-DHEAS_1	DHEA	Androgen		Hit reaction time SE
cc.16OH_DHEAS_1_m_32w_i_SG_GA_adj	SAB257	hitrtse	106.424	-2.09007	hormone metabolite	16OH-DHEAS_1	DHEA: 16OH-DHEAS_1	DHEA	Androgen		Hit reaction time SE
cc.16OH_DHEAS_1_m_32w_i_SG_GA_adj	SAB257	hitrtse	-143.27	-2.09007	hormone metabolite	16OH-DHEAS_1	DHEA: 16OH-DHEAS_1	DHEA	Androgen		Hit reaction time SE
cc.16OH_DHEAS_1_m_32w_i_SG_GA_adj	SAB258	hitrtse	0.711959	-0.697747	hormone metabolite	16OH-DHEAS_1	DHEA: 16OH-DHEAS_1	DHEA	Androgen		Hit reaction time SE
cc.16OH_DHEAS_1_m_32w_i_SG_GA_adj	SAB258	hitrtse	49.2341	-0.697747	hormone metabolite	16OH-DHEAS_1	DHEA: 16OH-DHEAS_1	DHEA	Androgen		Hit reaction time SE
cc.16OH_DHEAS_1_m_32w_i_SG_GA_adj	SAB258	hitrtse	217.488	-0.697747	hormone metabolite	16OH-DHEAS_1	DHEA: 16OH-DHEAS_1	DHEA	Androgen		Hit reaction time SE
cc.16OH_DHEAS_1_m_32w_i_SG_GA_adj	SAB258	hitrtse	-138.588	-0.697747	hormone metabolite	16OH-DHEAS_1	DHEA: 16OH-DHEAS_1	DHEA	Androgen		Hit reaction time SE
cc.16OH_DHEAS_1_m_32w_i_SG_GA_adj	SAB259	hitrtse	25.934	-1.58585	hormone metabolite	16OH-DHEAS_1	DHEA: 16OH-DHEAS_1	DHEA	Androgen		Hit reaction time SE
cc.16OH_DHEAS_1_m_32w_i_SG_GA_adj	SAB259	hitrtse	-105.004	-1.58585	hormone metabolite	16OH-DHEAS_1	DHEA: 16OH-DHEAS_1	DHEA	Androgen		Hit reaction time SE
cc.16OH_DHEAS_1_m_32w_i_SG_GA_adj	SAB259	hitrtse	24.7161	-1.58585	hormone metabolite	16OH-DHEAS_1	DHEA: 16OH-DHEAS_1	DHEA	Androgen		Hit reaction time SE
cc.16OH_DHEAS_1_m_32w_i_SG_GA_adj	SAB259	hitrtse	-173.649	-1.58585	hormone metabolite	16OH-DHEAS_1	DHEA: 16OH-DHEAS_1	DHEA	Androgen		Hit reaction time SE
cc.16OH_DHEAS_1_m_32w_i_SG_GA_adj	SAB260	hitrtse	80.7885	1.00968	hormone metabolite	16OH-DHEAS_1	DHEA: 16OH-DHEAS_1	DHEA	Androgen		Hit reaction time SE
cc.16OH_DHEAS_1_m_32w_i_SG_GA_adj	SAB260	hitrtse	176.461	1.00968	hormone metabolite	16OH-DHEAS_1	DHEA: 16OH-DHEAS_1	DHEA	Androgen		Hit reaction time SE
cc.16OH_DHEAS_1_m_32w_i_SG_GA_adj	SAB260	hitrtse	23.4505	1.00968	hormone metabolite	16OH-DHEAS_1	DHEA: 16OH-DHEAS_1	DHEA	Androgen		Hit reaction time SE
cc.16OH_DHEAS_1_m_32w_i_SG_GA_adj	SAB260	hitrtse	-141.82	1.00968	hormone metabolite	16OH-DHEAS_1	DHEA: 16OH-DHEAS_1	DHEA	Androgen		Hit reaction time SE
cc.16OH_DHEAS_1_m_32w_i_SG_GA_adj	SAB261	hitrtse	171.24	1.76382	hormone metabolite	16OH-DHEAS_1	DHEA: 16OH-DHEAS_1	DHEA	Androgen		Hit reaction time SE
cc.16OH_DHEAS_1_m_32w_i_SG_GA_adj	SAB261	hitrtse	130.73	1.76382	hormone metabolite	16OH-DHEAS_1	DHEA: 16OH-DHEAS_1	DHEA	Androgen		Hit reaction time SE
cc.16OH_DHEAS_1_m_32w_i_SG_GA_adj	SAB261	hitrtse	-142.734	1.76382	hormone metabolite	16OH-DHEAS_1	DHEA: 16OH-DHEAS_1	DHEA	Androgen		Hit reaction time SE
cc.16OH_DHEAS_1_m_32w_i_SG_GA_adj	SAB261	hitrtse	-137.972	1.76382	hormone metabolite	16OH-DHEAS_1	DHEA: 16OH-DHEAS_1	DHEA	Androgen		Hit reaction time SE
cc.16OH_DHEAS_1_m_32w_i_SG_GA_adj	SAB262	hitrtse	-114.793	0.0270363	hormone metabolite	16OH-DHEAS_1	DHEA: 16OH-DHEAS_1	DHEA	Androgen		Hit reaction time SE
cc.16OH_DHEAS_1_m_32w_i_SG_GA_adj	SAB262	hitrtse	-14.8257	0.0270363	hormone metabolite	16OH-DHEAS_1	DHEA: 16OH-DHEAS_1	DHEA	Androgen		Hit reaction time SE
cc.16OH_DHEAS_1_m_32w_i_SG_GA_adj	SAB262	hitrtse	-120.954	0.0270363	hormone metabolite	16OH-DHEAS_1	DHEA: 16OH-DHEAS_1	DHEA	Androgen		Hit reaction time SE
cc.16OH_DHEAS_1_m_32w_i_SG_GA_adj	SAB262	hitrtse	191.563	0.0270363	hormone metabolite	16OH-DHEAS_1	DHEA: 16OH-DHEAS_1	DHEA	Androgen		Hit reaction time SE
cc.16OH_DHEAS_1_m_32w_i_SG_GA_adj	SAB28	hitrtse	-47.9564	2.59484	hormone metabolite	16OH-DHEAS_1	DHEA: 16OH-DHEAS_1	DHEA	Androgen		Hit reaction time SE
cc.16OH_DHEAS_1_m_32w_i_SG_GA_adj	SAB28	hitrtse	-96.6788	2.59484	hormone metabolite	16OH-DHEAS_1	DHEA: 16OH-DHEAS_1	DHEA	Androgen		Hit reaction time SE
cc.16OH_DHEAS_1_m_32w_i_SG_GA_adj	SAB29	hitrtse	-104.11	-0.107642	hormone metabolite	16OH-DHEAS_1	DHEA: 16OH-DHEAS_1	DHEA	Androgen		Hit reaction time SE
cc.16OH_DHEAS_1_m_32w_i_SG_GA_adj	SAB29	hitrtse	-90.6683	-0.107642	hormone metabolite	16OH-DHEAS_1	DHEA: 16OH-DHEAS_1	DHEA	Androgen		Hit reaction time SE
cc.16OH_DHEAS_1_m_32w_i_SG_GA_adj	SAB29	hitrtse	129.089	-0.107642	hormone metabolite	16OH-DHEAS_1	DHEA: 16OH-DHEAS_1	DHEA	Androgen		Hit reaction time SE
cc.16OH_DHEAS_1_m_32w_i_SG_GA_adj	SAB3	hitrtse	95.4801	-0.582773	hormone metabolite	16OH-DHEAS_1	DHEA: 16OH-DHEAS_1	DHEA	Androgen		Hit reaction time SE
cc.16OH_DHEAS_1_m_32w_i_SG_GA_adj	SAB301	hitrtse	200.375	0.117195	hormone metabolite	16OH-DHEAS_1	DHEA: 16OH-DHEAS_1	DHEA	Androgen		Hit reaction time SE
cc.16OH_DHEAS_1_m_32w_i_SG_GA_adj	SAB301	hitrtse	-119.045	0.117195	hormone metabolite	16OH-DHEAS_1	DHEA: 16OH-DHEAS_1	DHEA	Androgen		Hit reaction time SE
cc.16OH_DHEAS_1_m_32w_i_SG_GA_adj	SAB301	hitrtse	126.201	0.117195	hormone metabolite	16OH-DHEAS_1	DHEA: 16OH-DHEAS_1	DHEA	Androgen		Hit reaction time SE
cc.16OH_DHEAS_1_m_32w_i_SG_GA_adj	SAB301	hitrtse	145.831	0.117195	hormone metabolite	16OH-DHEAS_1	DHEA: 16OH-DHEAS_1	DHEA	Androgen		Hit reaction time SE
cc.16OH_DHEAS_1_m_32w_i_SG_GA_adj	SAB302	hitrtse	-128.004	-1.32048	hormone metabolite	16OH-DHEAS_1	DHEA: 16OH-DHEAS_1	DHEA	Androgen		Hit reaction time SE
cc.16OH_DHEAS_1_m_32w_i_SG_GA_adj	SAB304	hitrtse	65.9877	-3.82505	hormone metabolite	16OH-DHEAS_1	DHEA: 16OH-DHEAS_1	DHEA	Androgen		Hit reaction time SE
cc.16OH_DHEAS_1_m_32w_i_SG_GA_adj	SAB304	hitrtse	121.25	-3.82505	hormone metabolite	16OH-DHEAS_1	DHEA: 16OH-DHEAS_1	DHEA	Androgen		Hit reaction time SE
cc.16OH_DHEAS_1_m_32w_i_SG_GA_adj	SAB304	hitrtse	-107.759	-3.82505	hormone metabolite	16OH-DHEAS_1	DHEA: 16OH-DHEAS_1	DHEA	Androgen		Hit reaction time SE
cc.16OH_DHEAS_1_m_32w_i_SG_GA_adj	SAB304	hitrtse	-21.1156	-3.82505	hormone metabolite	16OH-DHEAS_1	DHEA: 16OH-DHEAS_1	DHEA	Androgen		Hit reaction time SE
cc.16OH_DHEAS_1_m_32w_i_SG_GA_adj	SAB306	hitrtse	47.0052	-2.10554	hormone metabolite	16OH-DHEAS_1	DHEA: 16OH-DHEAS_1	DHEA	Androgen		Hit reaction time SE
cc.16OH_DHEAS_1_m_32w_i_SG_GA_adj	SAB306	hitrtse	-11.7953	-2.10554	hormone metabolite	16OH-DHEAS_1	DHEA: 16OH-DHEAS_1	DHEA	Androgen		Hit reaction time SE
cc.16OH_DHEAS_1_m_32w_i_SG_GA_adj	SAB306	hitrtse	82.0466	-2.10554	hormone metabolite	16OH-DHEAS_1	DHEA: 16OH-DHEAS_1	DHEA	Androgen		Hit reaction time SE
cc.16OH_DHEAS_1_m_32w_i_SG_GA_adj	SAB306	hitrtse	-140.866	-2.10554	hormone metabolite	16OH-DHEAS_1	DHEA: 16OH-DHEAS_1	DHEA	Androgen		Hit reaction time SE
cc.16OH_DHEAS_1_m_32w_i_SG_GA_adj	SAB307	hitrtse	114.437	-2.20917	hormone metabolite	16OH-DHEAS_1	DHEA: 16OH-DHEAS_1	DHEA	Androgen		Hit reaction time SE
cc.16OH_DHEAS_1_m_32w_i_SG_GA_adj	SAB307	hitrtse	-41.8946	-2.20917	hormone metabolite	16OH-DHEAS_1	DHEA: 16OH-DHEAS_1	DHEA	Androgen		Hit reaction time SE
cc.16OH_DHEAS_1_m_32w_i_SG_GA_adj	SAB307	hitrtse	-110.084	-2.20917	hormone metabolite	16OH-DHEAS_1	DHEA: 16OH-DHEAS_1	DHEA	Androgen		Hit reaction time SE
cc.16OH_DHEAS_1_m_32w_i_SG_GA_adj	SAB308	hitrtse	39.2365	-0.665463	hormone metabolite	16OH-DHEAS_1	DHEA: 16OH-DHEAS_1	DHEA	Androgen		Hit reaction time SE
cc.16OH_DHEAS_1_m_32w_i_SG_GA_adj	SAB308	hitrtse	15.9764	-0.665463	hormone metabolite	16OH-DHEAS_1	DHEA: 16OH-DHEAS_1	DHEA	Androgen		Hit reaction time SE
cc.16OH_DHEAS_1_m_32w_i_SG_GA_adj	SAB308	hitrtse	152.736	-0.665463	hormone metabolite	16OH-DHEAS_1	DHEA: 16OH-DHEAS_1	DHEA	Androgen		Hit reaction time SE
cc.16OH_DHEAS_1_m_32w_i_SG_GA_adj	SAB308	hitrtse	-129.552	-0.665463	hormone metabolite	16OH-DHEAS_1	DHEA: 16OH-DHEAS_1	DHEA	Androgen		Hit reaction time SE
cc.16OH_DHEAS_1_m_32w_i_SG_GA_adj	SAB309	hitrtse	-148.651	0.511303	hormone metabolite	16OH-DHEAS_1	DHEA: 16OH-DHEAS_1	DHEA	Androgen		Hit reaction time SE
cc.16OH_DHEAS_1_m_32w_i_SG_GA_adj	SAB309	hitrtse	-80.0529	0.511303	hormone metabolite	16OH-DHEAS_1	DHEA: 16OH-DHEAS_1	DHEA	Androgen		Hit reaction time SE
cc.16OH_DHEAS_1_m_32w_i_SG_GA_adj	SAB309	hitrtse	-156.851	0.511303	hormone metabolite	16OH-DHEAS_1	DHEA: 16OH-DHEAS_1	DHEA	Androgen		Hit reaction time SE
cc.16OH_DHEAS_1_m_32w_i_SG_GA_adj	SAB309	hitrtse	42.344	0.511303	hormone metabolite	16OH-DHEAS_1	DHEA: 16OH-DHEAS_1	DHEA	Androgen		Hit reaction time SE
cc.16OH_DHEAS_1_m_32w_i_SG_GA_adj	SAB31	hitrtse	162.384	-0.28475	hormone metabolite	16OH-DHEAS_1	DHEA: 16OH-DHEAS_1	DHEA	Androgen		Hit reaction time SE
cc.16OH_DHEAS_1_m_32w_i_SG_GA_adj	SAB31	hitrtse	-138.791	-0.28475	hormone metabolite	16OH-DHEAS_1	DHEA: 16OH-DHEAS_1	DHEA	Androgen		Hit reaction time SE
cc.16OH_DHEAS_1_m_32w_i_SG_GA_adj	SAB31	hitrtse	-134.053	-0.28475	hormone metabolite	16OH-DHEAS_1	DHEA: 16OH-DHEAS_1	DHEA	Androgen		Hit reaction time SE
cc.16OH_DHEAS_1_m_32w_i_SG_GA_adj	SAB311	hitrtse	-24.9615	-1.12724	hormone metabolite	16OH-DHEAS_1	DHEA: 16OH-DHEAS_1	DHEA	Androgen		Hit reaction time SE
cc.16OH_DHEAS_1_m_32w_i_SG_GA_adj	SAB311	hitrtse	235.391	-1.12724	hormone metabolite	16OH-DHEAS_1	DHEA: 16OH-DHEAS_1	DHEA	Androgen		Hit reaction time SE
cc.16OH_DHEAS_1_m_32w_i_SG_GA_adj	SAB311	hitrtse	-93.5283	-1.12724	hormone metabolite	16OH-DHEAS_1	DHEA: 16OH-DHEAS_1	DHEA	Androgen		Hit reaction time SE
cc.16OH_DHEAS_1_m_32w_i_SG_GA_adj	SAB311	hitrtse	-104.583	-1.12724	hormone metabolite	16OH-DHEAS_1	DHEA: 16OH-DHEAS_1	DHEA	Androgen		Hit reaction time SE
cc.16OH_DHEAS_1_m_32w_i_SG_GA_adj	SAB314	hitrtse	-150.793	-1.39003	hormone metabolite	16OH-DHEAS_1	DHEA: 16OH-DHEAS_1	DHEA	Androgen		Hit reaction time SE
cc.16OH_DHEAS_1_m_32w_i_SG_GA_adj	SAB314	hitrtse	40.8787	-1.39003	hormone metabolite	16OH-DHEAS_1	DHEA: 16OH-DHEAS_1	DHEA	Androgen		Hit reaction time SE
cc.16OH_DHEAS_1_m_32w_i_SG_GA_adj	SAB314	hitrtse	272.96	-1.39003	hormone metabolite	16OH-DHEAS_1	DHEA: 16OH-DHEAS_1	DHEA	Androgen		Hit reaction time SE
cc.16OH_DHEAS_1_m_32w_i_SG_GA_adj	SAB314	hitrtse	99.8993	-1.39003	hormone metabolite	16OH-DHEAS_1	DHEA: 16OH-DHEAS_1	DHEA	Androgen		Hit reaction time SE
cc.16OH_DHEAS_1_m_32w_i_SG_GA_adj	SAB315	hitrtse	161.636	-1.13173	hormone metabolite	16OH-DHEAS_1	DHEA: 16OH-DHEAS_1	DHEA	Androgen		Hit reaction time SE
cc.16OH_DHEAS_1_m_32w_i_SG_GA_adj	SAB315	hitrtse	313.203	-1.13173	hormone metabolite	16OH-DHEAS_1	DHEA: 16OH-DHEAS_1	DHEA	Androgen		Hit reaction time SE
cc.16OH_DHEAS_1_m_32w_i_SG_GA_adj	SAB315	hitrtse	170.832	-1.13173	hormone metabolite	16OH-DHEAS_1	DHEA: 16OH-DHEAS_1	DHEA	Androgen		Hit reaction time SE
cc.16OH_DHEAS_1_m_32w_i_SG_GA_adj	SAB319	hitrtse	-15.0377	1.23313	hormone metabolite	16OH-DHEAS_1	DHEA: 16OH-DHEAS_1	DHEA	Androgen		Hit reaction time SE
cc.16OH_DHEAS_1_m_32w_i_SG_GA_adj	SAB319	hitrtse	219.764	1.23313	hormone metabolite	16OH-DHEAS_1	DHEA: 16OH-DHEAS_1	DHEA	Androgen		Hit reaction time SE
cc.16OH_DHEAS_1_m_32w_i_SG_GA_adj	SAB319	hitrtse	-140.383	1.23313	hormone metabolite	16OH-DHEAS_1	DHEA: 16OH-DHEAS_1	DHEA	Androgen		Hit reaction time SE
cc.16OH_DHEAS_1_m_32w_i_SG_GA_adj	SAB319	hitrtse	-57.8786	1.23313	hormone metabolite	16OH-DHEAS_1	DHEA: 16OH-DHEAS_1	DHEA	Androgen		Hit reaction time SE
cc.16OH_DHEAS_1_m_32w_i_SG_GA_adj	SAB320	hitrtse	-144.951	-0.818849	hormone metabolite	16OH-DHEAS_1	DHEA: 16OH-DHEAS_1	DHEA	Androgen		Hit reaction time SE
cc.16OH_DHEAS_1_m_32w_i_SG_GA_adj	SAB320	hitrtse	176.45	-0.818849	hormone metabolite	16OH-DHEAS_1	DHEA: 16OH-DHEAS_1	DHEA	Androgen		Hit reaction time SE
cc.16OH_DHEAS_1_m_32w_i_SG_GA_adj	SAB320	hitrtse	-32.104	-0.818849	hormone metabolite	16OH-DHEAS_1	DHEA: 16OH-DHEAS_1	DHEA	Androgen		Hit reaction time SE
cc.16OH_DHEAS_1_m_32w_i_SG_GA_adj	SAB320	hitrtse	-17.8562	-0.818849	hormone metabolite	16OH-DHEAS_1	DHEA: 16OH-DHEAS_1	DHEA	Androgen		Hit reaction time SE
cc.16OH_DHEAS_1_m_32w_i_SG_GA_adj	SAB321	hitrtse	85.3154	-0.0111282	hormone metabolite	16OH-DHEAS_1	DHEA: 16OH-DHEAS_1	DHEA	Androgen		Hit reaction time SE
cc.16OH_DHEAS_1_m_32w_i_SG_GA_adj	SAB321	hitrtse	-140.708	-0.0111282	hormone metabolite	16OH-DHEAS_1	DHEA: 16OH-DHEAS_1	DHEA	Androgen		Hit reaction time SE
cc.16OH_DHEAS_1_m_32w_i_SG_GA_adj	SAB323	hitrtse	-125.095	0.253418	hormone metabolite	16OH-DHEAS_1	DHEA: 16OH-DHEAS_1	DHEA	Androgen		Hit reaction time SE
cc.16OH_DHEAS_1_m_32w_i_SG_GA_adj	SAB323	hitrtse	201.47	0.253418	hormone metabolite	16OH-DHEAS_1	DHEA: 16OH-DHEAS_1	DHEA	Androgen		Hit reaction time SE
cc.16OH_DHEAS_1_m_32w_i_SG_GA_adj	SAB323	hitrtse	-73.0726	0.253418	hormone metabolite	16OH-DHEAS_1	DHEA: 16OH-DHEAS_1	DHEA	Androgen		Hit reaction time SE
cc.16OH_DHEAS_1_m_32w_i_SG_GA_adj	SAB323	hitrtse	36.8342	0.253418	hormone metabolite	16OH-DHEAS_1	DHEA: 16OH-DHEAS_1	DHEA	Androgen		Hit reaction time SE
cc.16OH_DHEAS_1_m_32w_i_SG_GA_adj	SAB324	hitrtse	164.492	-1.4555	hormone metabolite	16OH-DHEAS_1	DHEA: 16OH-DHEAS_1	DHEA	Androgen		Hit reaction time SE
cc.16OH_DHEAS_1_m_32w_i_SG_GA_adj	SAB324	hitrtse	-113.171	-1.4555	hormone metabolite	16OH-DHEAS_1	DHEA: 16OH-DHEAS_1	DHEA	Androgen		Hit reaction time SE
cc.16OH_DHEAS_1_m_32w_i_SG_GA_adj	SAB324	hitrtse	40.7458	-1.4555	hormone metabolite	16OH-DHEAS_1	DHEA: 16OH-DHEAS_1	DHEA	Androgen		Hit reaction time SE
cc.16OH_DHEAS_1_m_32w_i_SG_GA_adj	SAB325	hitrtse	-141.552	-0.34641	hormone metabolite	16OH-DHEAS_1	DHEA: 16OH-DHEAS_1	DHEA	Androgen		Hit reaction time SE
cc.16OH_DHEAS_1_m_32w_i_SG_GA_adj	SAB325	hitrtse	170.094	-0.34641	hormone metabolite	16OH-DHEAS_1	DHEA: 16OH-DHEAS_1	DHEA	Androgen		Hit reaction time SE
cc.16OH_DHEAS_1_m_32w_i_SG_GA_adj	SAB328	hitrtse	-141.816	-0.833535	hormone metabolite	16OH-DHEAS_1	DHEA: 16OH-DHEAS_1	DHEA	Androgen		Hit reaction time SE
cc.16OH_DHEAS_1_m_32w_i_SG_GA_adj	SAB328	hitrtse	130.262	-0.833535	hormone metabolite	16OH-DHEAS_1	DHEA: 16OH-DHEAS_1	DHEA	Androgen		Hit reaction time SE
cc.16OH_DHEAS_1_m_32w_i_SG_GA_adj	SAB328	hitrtse	265.242	-0.833535	hormone metabolite	16OH-DHEAS_1	DHEA: 16OH-DHEAS_1	DHEA	Androgen		Hit reaction time SE
cc.16OH_DHEAS_1_m_32w_i_SG_GA_adj	SAB329	hitrtse	-156.849	0.773492	hormone metabolite	16OH-DHEAS_1	DHEA: 16OH-DHEAS_1	DHEA	Androgen		Hit reaction time SE
cc.16OH_DHEAS_1_m_32w_i_SG_GA_adj	SAB329	hitrtse	-10.4326	0.773492	hormone metabolite	16OH-DHEAS_1	DHEA: 16OH-DHEAS_1	DHEA	Androgen		Hit reaction time SE
cc.16OH_DHEAS_1_m_32w_i_SG_GA_adj	SAB329	hitrtse	22.2482	0.773492	hormone metabolite	16OH-DHEAS_1	DHEA: 16OH-DHEAS_1	DHEA	Androgen		Hit reaction time SE
cc.16OH_DHEAS_1_m_32w_i_SG_GA_adj	SAB329	hitrtse	-164.366	0.773492	hormone metabolite	16OH-DHEAS_1	DHEA: 16OH-DHEAS_1	DHEA	Androgen		Hit reaction time SE
cc.16OH_DHEAS_1_m_32w_i_SG_GA_adj	SAB33	hitrtse	-87.3347	-0.574567	hormone metabolite	16OH-DHEAS_1	DHEA: 16OH-DHEAS_1	DHEA	Androgen		Hit reaction time SE
cc.16OH_DHEAS_1_m_32w_i_SG_GA_adj	SAB33	hitrtse	116.512	-0.574567	hormone metabolite	16OH-DHEAS_1	DHEA: 16OH-DHEAS_1	DHEA	Androgen		Hit reaction time SE
cc.16OH_DHEAS_1_m_32w_i_SG_GA_adj	SAB33	hitrtse	143.669	-0.574567	hormone metabolite	16OH-DHEAS_1	DHEA: 16OH-DHEAS_1	DHEA	Androgen		Hit reaction time SE
cc.16OH_DHEAS_1_m_32w_i_SG_GA_adj	SAB331	hitrtse	43.0818	1.32599	hormone metabolite	16OH-DHEAS_1	DHEA: 16OH-DHEAS_1	DHEA	Androgen		Hit reaction time SE
cc.16OH_DHEAS_1_m_32w_i_SG_GA_adj	SAB331	hitrtse	-142.012	1.32599	hormone metabolite	16OH-DHEAS_1	DHEA: 16OH-DHEAS_1	DHEA	Androgen		Hit reaction time SE
cc.16OH_DHEAS_1_m_32w_i_SG_GA_adj	SAB331	hitrtse	79.7936	1.32599	hormone metabolite	16OH-DHEAS_1	DHEA: 16OH-DHEAS_1	DHEA	Androgen		Hit reaction time SE
cc.16OH_DHEAS_1_m_32w_i_SG_GA_adj	SAB333	hitrtse	95.4166	0.459271	hormone metabolite	16OH-DHEAS_1	DHEA: 16OH-DHEAS_1	DHEA	Androgen		Hit reaction time SE
cc.16OH_DHEAS_1_m_32w_i_SG_GA_adj	SAB333	hitrtse	185.965	0.459271	hormone metabolite	16OH-DHEAS_1	DHEA: 16OH-DHEAS_1	DHEA	Androgen		Hit reaction time SE
cc.16OH_DHEAS_1_m_32w_i_SG_GA_adj	SAB333	hitrtse	155.066	0.459271	hormone metabolite	16OH-DHEAS_1	DHEA: 16OH-DHEAS_1	DHEA	Androgen		Hit reaction time SE
cc.16OH_DHEAS_1_m_32w_i_SG_GA_adj	SAB333	hitrtse	-123.86	0.459271	hormone metabolite	16OH-DHEAS_1	DHEA: 16OH-DHEAS_1	DHEA	Androgen		Hit reaction time SE
cc.16OH_DHEAS_1_m_32w_i_SG_GA_adj	SAB334	hitrtse	-3.76975	0.0344526	hormone metabolite	16OH-DHEAS_1	DHEA: 16OH-DHEAS_1	DHEA	Androgen		Hit reaction time SE
cc.16OH_DHEAS_1_m_32w_i_SG_GA_adj	SAB334	hitrtse	100.837	0.0344526	hormone metabolite	16OH-DHEAS_1	DHEA: 16OH-DHEAS_1	DHEA	Androgen		Hit reaction time SE
cc.16OH_DHEAS_1_m_32w_i_SG_GA_adj	SAB334	hitrtse	111.364	0.0344526	hormone metabolite	16OH-DHEAS_1	DHEA: 16OH-DHEAS_1	DHEA	Androgen		Hit reaction time SE
cc.16OH_DHEAS_1_m_32w_i_SG_GA_adj	SAB334	hitrtse	-149.31	0.0344526	hormone metabolite	16OH-DHEAS_1	DHEA: 16OH-DHEAS_1	DHEA	Androgen		Hit reaction time SE
cc.16OH_DHEAS_1_m_32w_i_SG_GA_adj	SAB336	hitrtse	187.635	-3.52987	hormone metabolite	16OH-DHEAS_1	DHEA: 16OH-DHEAS_1	DHEA	Androgen		Hit reaction time SE
cc.16OH_DHEAS_1_m_32w_i_SG_GA_adj	SAB336	hitrtse	113.593	-3.52987	hormone metabolite	16OH-DHEAS_1	DHEA: 16OH-DHEAS_1	DHEA	Androgen		Hit reaction time SE
cc.16OH_DHEAS_1_m_32w_i_SG_GA_adj	SAB336	hitrtse	-114.847	-3.52987	hormone metabolite	16OH-DHEAS_1	DHEA: 16OH-DHEAS_1	DHEA	Androgen		Hit reaction time SE
cc.16OH_DHEAS_1_m_32w_i_SG_GA_adj	SAB336	hitrtse	-107.934	-3.52987	hormone metabolite	16OH-DHEAS_1	DHEA: 16OH-DHEAS_1	DHEA	Androgen		Hit reaction time SE
cc.16OH_DHEAS_1_m_32w_i_SG_GA_adj	SAB337	hitrtse	31.4866	1.46831	hormone metabolite	16OH-DHEAS_1	DHEA: 16OH-DHEAS_1	DHEA	Androgen		Hit reaction time SE
cc.16OH_DHEAS_1_m_32w_i_SG_GA_adj	SAB337	hitrtse	73.8219	1.46831	hormone metabolite	16OH-DHEAS_1	DHEA: 16OH-DHEAS_1	DHEA	Androgen		Hit reaction time SE
cc.16OH_DHEAS_1_m_32w_i_SG_GA_adj	SAB337	hitrtse	-69.3895	1.46831	hormone metabolite	16OH-DHEAS_1	DHEA: 16OH-DHEAS_1	DHEA	Androgen		Hit reaction time SE
cc.16OH_DHEAS_1_m_32w_i_SG_GA_adj	SAB338	hitrtse	36.1244	-0.866142	hormone metabolite	16OH-DHEAS_1	DHEA: 16OH-DHEAS_1	DHEA	Androgen		Hit reaction time SE
cc.16OH_DHEAS_1_m_32w_i_SG_GA_adj	SAB338	hitrtse	-136.993	-0.866142	hormone metabolite	16OH-DHEAS_1	DHEA: 16OH-DHEAS_1	DHEA	Androgen		Hit reaction time SE
cc.16OH_DHEAS_1_m_32w_i_SG_GA_adj	SAB338	hitrtse	181.767	-0.866142	hormone metabolite	16OH-DHEAS_1	DHEA: 16OH-DHEAS_1	DHEA	Androgen		Hit reaction time SE
cc.16OH_DHEAS_1_m_32w_i_SG_GA_adj	SAB338	hitrtse	-16.2289	-0.866142	hormone metabolite	16OH-DHEAS_1	DHEA: 16OH-DHEAS_1	DHEA	Androgen		Hit reaction time SE
cc.16OH_DHEAS_1_m_32w_i_SG_GA_adj	SAB339	hitrtse	115.634	-2.53334	hormone metabolite	16OH-DHEAS_1	DHEA: 16OH-DHEAS_1	DHEA	Androgen		Hit reaction time SE
cc.16OH_DHEAS_1_m_32w_i_SG_GA_adj	SAB339	hitrtse	-92.6127	-2.53334	hormone metabolite	16OH-DHEAS_1	DHEA: 16OH-DHEAS_1	DHEA	Androgen		Hit reaction time SE
cc.16OH_DHEAS_1_m_32w_i_SG_GA_adj	SAB339	hitrtse	-138.453	-2.53334	hormone metabolite	16OH-DHEAS_1	DHEA: 16OH-DHEAS_1	DHEA	Androgen		Hit reaction time SE
cc.16OH_DHEAS_1_m_32w_i_SG_GA_adj	SAB339	hitrtse	-106.731	-2.53334	hormone metabolite	16OH-DHEAS_1	DHEA: 16OH-DHEAS_1	DHEA	Androgen		Hit reaction time SE
cc.16OH_DHEAS_1_m_32w_i_SG_GA_adj	SAB340	hitrtse	105.414	0.152653	hormone metabolite	16OH-DHEAS_1	DHEA: 16OH-DHEAS_1	DHEA	Androgen		Hit reaction time SE
cc.16OH_DHEAS_1_m_32w_i_SG_GA_adj	SAB341	hitrtse	40.6329	-1.07607	hormone metabolite	16OH-DHEAS_1	DHEA: 16OH-DHEAS_1	DHEA	Androgen		Hit reaction time SE
cc.16OH_DHEAS_1_m_32w_i_SG_GA_adj	SAB341	hitrtse	46.6735	-1.07607	hormone metabolite	16OH-DHEAS_1	DHEA: 16OH-DHEAS_1	DHEA	Androgen		Hit reaction time SE
cc.16OH_DHEAS_1_m_32w_i_SG_GA_adj	SAB341	hitrtse	-145.768	-1.07607	hormone metabolite	16OH-DHEAS_1	DHEA: 16OH-DHEAS_1	DHEA	Androgen		Hit reaction time SE
cc.16OH_DHEAS_1_m_32w_i_SG_GA_adj	SAB341	hitrtse	-24.8561	-1.07607	hormone metabolite	16OH-DHEAS_1	DHEA: 16OH-DHEAS_1	DHEA	Androgen		Hit reaction time SE
cc.16OH_DHEAS_1_m_32w_i_SG_GA_adj	SAB342	hitrtse	112.779	-0.726613	hormone metabolite	16OH-DHEAS_1	DHEA: 16OH-DHEAS_1	DHEA	Androgen		Hit reaction time SE
cc.16OH_DHEAS_1_m_32w_i_SG_GA_adj	SAB342	hitrtse	230.844	-0.726613	hormone metabolite	16OH-DHEAS_1	DHEA: 16OH-DHEAS_1	DHEA	Androgen		Hit reaction time SE
cc.16OH_DHEAS_1_m_32w_i_SG_GA_adj	SAB342	hitrtse	3.16448	-0.726613	hormone metabolite	16OH-DHEAS_1	DHEA: 16OH-DHEAS_1	DHEA	Androgen		Hit reaction time SE
cc.16OH_DHEAS_1_m_32w_i_SG_GA_adj	SAB342	hitrtse	-144.847	-0.726613	hormone metabolite	16OH-DHEAS_1	DHEA: 16OH-DHEAS_1	DHEA	Androgen		Hit reaction time SE
cc.16OH_DHEAS_1_m_32w_i_SG_GA_adj	SAB344	hitrtse	182.628	-1.2486	hormone metabolite	16OH-DHEAS_1	DHEA: 16OH-DHEAS_1	DHEA	Androgen		Hit reaction time SE
cc.16OH_DHEAS_1_m_32w_i_SG_GA_adj	SAB344	hitrtse	-112.27	-1.2486	hormone metabolite	16OH-DHEAS_1	DHEA: 16OH-DHEAS_1	DHEA	Androgen		Hit reaction time SE
cc.16OH_DHEAS_1_m_32w_i_SG_GA_adj	SAB345	hitrtse	180.551	0.00341361	hormone metabolite	16OH-DHEAS_1	DHEA: 16OH-DHEAS_1	DHEA	Androgen		Hit reaction time SE
cc.16OH_DHEAS_1_m_32w_i_SG_GA_adj	SAB345	hitrtse	-154.434	0.00341361	hormone metabolite	16OH-DHEAS_1	DHEA: 16OH-DHEAS_1	DHEA	Androgen		Hit reaction time SE
cc.16OH_DHEAS_1_m_32w_i_SG_GA_adj	SAB345	hitrtse	-46.3092	0.00341361	hormone metabolite	16OH-DHEAS_1	DHEA: 16OH-DHEAS_1	DHEA	Androgen		Hit reaction time SE
cc.16OH_DHEAS_1_m_32w_i_SG_GA_adj	SAB345	hitrtse	105.778	0.00341361	hormone metabolite	16OH-DHEAS_1	DHEA: 16OH-DHEAS_1	DHEA	Androgen		Hit reaction time SE
cc.16OH_DHEAS_1_m_32w_i_SG_GA_adj	SAB346	hitrtse	239.19	-0.577973	hormone metabolite	16OH-DHEAS_1	DHEA: 16OH-DHEAS_1	DHEA	Androgen		Hit reaction time SE
cc.16OH_DHEAS_1_m_32w_i_SG_GA_adj	SAB346	hitrtse	123.957	-0.577973	hormone metabolite	16OH-DHEAS_1	DHEA: 16OH-DHEAS_1	DHEA	Androgen		Hit reaction time SE
cc.16OH_DHEAS_1_m_32w_i_SG_GA_adj	SAB346	hitrtse	-72.8197	-0.577973	hormone metabolite	16OH-DHEAS_1	DHEA: 16OH-DHEAS_1	DHEA	Androgen		Hit reaction time SE
cc.16OH_DHEAS_1_m_32w_i_SG_GA_adj	SAB346	hitrtse	-121.937	-0.577973	hormone metabolite	16OH-DHEAS_1	DHEA: 16OH-DHEAS_1	DHEA	Androgen		Hit reaction time SE
cc.16OH_DHEAS_1_m_32w_i_SG_GA_adj	SAB347	hitrtse	-146.235	1.40505	hormone metabolite	16OH-DHEAS_1	DHEA: 16OH-DHEAS_1	DHEA	Androgen		Hit reaction time SE
cc.16OH_DHEAS_1_m_32w_i_SG_GA_adj	SAB347	hitrtse	129.57	1.40505	hormone metabolite	16OH-DHEAS_1	DHEA: 16OH-DHEAS_1	DHEA	Androgen		Hit reaction time SE
cc.16OH_DHEAS_1_m_32w_i_SG_GA_adj	SAB35	hitrtse	-103.607	-1.00871	hormone metabolite	16OH-DHEAS_1	DHEA: 16OH-DHEAS_1	DHEA	Androgen		Hit reaction time SE
cc.16OH_DHEAS_1_m_32w_i_SG_GA_adj	SAB35	hitrtse	-160.187	-1.00871	hormone metabolite	16OH-DHEAS_1	DHEA: 16OH-DHEAS_1	DHEA	Androgen		Hit reaction time SE
cc.16OH_DHEAS_1_m_32w_i_SG_GA_adj	SAB35	hitrtse	150.971	-1.00871	hormone metabolite	16OH-DHEAS_1	DHEA: 16OH-DHEAS_1	DHEA	Androgen		Hit reaction time SE
cc.16OH_DHEAS_1_m_32w_i_SG_GA_adj	SAB350	hitrtse	75.0294	0.00185369	hormone metabolite	16OH-DHEAS_1	DHEA: 16OH-DHEAS_1	DHEA	Androgen		Hit reaction time SE
cc.16OH_DHEAS_1_m_32w_i_SG_GA_adj	SAB350	hitrtse	-148.226	0.00185369	hormone metabolite	16OH-DHEAS_1	DHEA: 16OH-DHEAS_1	DHEA	Androgen		Hit reaction time SE
cc.16OH_DHEAS_1_m_32w_i_SG_GA_adj	SAB350	hitrtse	-37.8435	0.00185369	hormone metabolite	16OH-DHEAS_1	DHEA: 16OH-DHEAS_1	DHEA	Androgen		Hit reaction time SE
cc.16OH_DHEAS_1_m_32w_i_SG_GA_adj	SAB350	hitrtse	-53.5417	0.00185369	hormone metabolite	16OH-DHEAS_1	DHEA: 16OH-DHEAS_1	DHEA	Androgen		Hit reaction time SE
cc.16OH_DHEAS_1_m_32w_i_SG_GA_adj	SAB352	hitrtse	-104.465	-2.08586	hormone metabolite	16OH-DHEAS_1	DHEA: 16OH-DHEAS_1	DHEA	Androgen		Hit reaction time SE
cc.16OH_DHEAS_1_m_32w_i_SG_GA_adj	SAB352	hitrtse	107.825	-2.08586	hormone metabolite	16OH-DHEAS_1	DHEA: 16OH-DHEAS_1	DHEA	Androgen		Hit reaction time SE
cc.16OH_DHEAS_1_m_32w_i_SG_GA_adj	SAB352	hitrtse	-157.53	-2.08586	hormone metabolite	16OH-DHEAS_1	DHEA: 16OH-DHEAS_1	DHEA	Androgen		Hit reaction time SE
cc.16OH_DHEAS_1_m_32w_i_SG_GA_adj	SAB352	hitrtse	216.715	-2.08586	hormone metabolite	16OH-DHEAS_1	DHEA: 16OH-DHEAS_1	DHEA	Androgen		Hit reaction time SE
cc.16OH_DHEAS_1_m_32w_i_SG_GA_adj	SAB353	hitrtse	-171.369	0.988999	hormone metabolite	16OH-DHEAS_1	DHEA: 16OH-DHEAS_1	DHEA	Androgen		Hit reaction time SE
cc.16OH_DHEAS_1_m_32w_i_SG_GA_adj	SAB353	hitrtse	-59.2558	0.988999	hormone metabolite	16OH-DHEAS_1	DHEA: 16OH-DHEAS_1	DHEA	Androgen		Hit reaction time SE
cc.16OH_DHEAS_1_m_32w_i_SG_GA_adj	SAB353	hitrtse	149.412	0.988999	hormone metabolite	16OH-DHEAS_1	DHEA: 16OH-DHEAS_1	DHEA	Androgen		Hit reaction time SE
cc.16OH_DHEAS_1_m_32w_i_SG_GA_adj	SAB353	hitrtse	-149.169	0.988999	hormone metabolite	16OH-DHEAS_1	DHEA: 16OH-DHEAS_1	DHEA	Androgen		Hit reaction time SE
cc.16OH_DHEAS_1_m_32w_i_SG_GA_adj	SAB355	hitrtse	92.2593	0.92179	hormone metabolite	16OH-DHEAS_1	DHEA: 16OH-DHEAS_1	DHEA	Androgen		Hit reaction time SE
cc.16OH_DHEAS_1_m_32w_i_SG_GA_adj	SAB355	hitrtse	63.0106	0.92179	hormone metabolite	16OH-DHEAS_1	DHEA: 16OH-DHEAS_1	DHEA	Androgen		Hit reaction time SE
cc.16OH_DHEAS_1_m_32w_i_SG_GA_adj	SAB355	hitrtse	195.437	0.92179	hormone metabolite	16OH-DHEAS_1	DHEA: 16OH-DHEAS_1	DHEA	Androgen		Hit reaction time SE
cc.16OH_DHEAS_1_m_32w_i_SG_GA_adj	SAB355	hitrtse	-99.7391	0.92179	hormone metabolite	16OH-DHEAS_1	DHEA: 16OH-DHEAS_1	DHEA	Androgen		Hit reaction time SE
cc.16OH_DHEAS_1_m_32w_i_SG_GA_adj	SAB356	hitrtse	-141.479	0.102165	hormone metabolite	16OH-DHEAS_1	DHEA: 16OH-DHEAS_1	DHEA	Androgen		Hit reaction time SE
cc.16OH_DHEAS_1_m_32w_i_SG_GA_adj	SAB356	hitrtse	-115.566	0.102165	hormone metabolite	16OH-DHEAS_1	DHEA: 16OH-DHEAS_1	DHEA	Androgen		Hit reaction time SE
cc.16OH_DHEAS_1_m_32w_i_SG_GA_adj	SAB356	hitrtse	143.361	0.102165	hormone metabolite	16OH-DHEAS_1	DHEA: 16OH-DHEAS_1	DHEA	Androgen		Hit reaction time SE
cc.16OH_DHEAS_1_m_32w_i_SG_GA_adj	SAB356	hitrtse	-143.06	0.102165	hormone metabolite	16OH-DHEAS_1	DHEA: 16OH-DHEAS_1	DHEA	Androgen		Hit reaction time SE
cc.16OH_DHEAS_1_m_32w_i_SG_GA_adj	SAB357	hitrtse	-3.26436	-2.2976	hormone metabolite	16OH-DHEAS_1	DHEA: 16OH-DHEAS_1	DHEA	Androgen		Hit reaction time SE
cc.16OH_DHEAS_1_m_32w_i_SG_GA_adj	SAB357	hitrtse	-66.1045	-2.2976	hormone metabolite	16OH-DHEAS_1	DHEA: 16OH-DHEAS_1	DHEA	Androgen		Hit reaction time SE
cc.16OH_DHEAS_1_m_32w_i_SG_GA_adj	SAB357	hitrtse	-133.19	-2.2976	hormone metabolite	16OH-DHEAS_1	DHEA: 16OH-DHEAS_1	DHEA	Androgen		Hit reaction time SE
cc.16OH_DHEAS_1_m_32w_i_SG_GA_adj	SAB357	hitrtse	-18.4917	-2.2976	hormone metabolite	16OH-DHEAS_1	DHEA: 16OH-DHEAS_1	DHEA	Androgen		Hit reaction time SE
cc.16OH_DHEAS_1_m_32w_i_SG_GA_adj	SAB358	hitrtse	-122.012	0.527055	hormone metabolite	16OH-DHEAS_1	DHEA: 16OH-DHEAS_1	DHEA	Androgen		Hit reaction time SE
cc.16OH_DHEAS_1_m_32w_i_SG_GA_adj	SAB358	hitrtse	9.88052	0.527055	hormone metabolite	16OH-DHEAS_1	DHEA: 16OH-DHEAS_1	DHEA	Androgen		Hit reaction time SE
cc.16OH_DHEAS_1_m_32w_i_SG_GA_adj	SAB358	hitrtse	160.998	0.527055	hormone metabolite	16OH-DHEAS_1	DHEA: 16OH-DHEAS_1	DHEA	Androgen		Hit reaction time SE
cc.16OH_DHEAS_1_m_32w_i_SG_GA_adj	SAB358	hitrtse	-165.431	0.527055	hormone metabolite	16OH-DHEAS_1	DHEA: 16OH-DHEAS_1	DHEA	Androgen		Hit reaction time SE
cc.16OH_DHEAS_1_m_32w_i_SG_GA_adj	SAB359	hitrtse	-126.114	-0.267025	hormone metabolite	16OH-DHEAS_1	DHEA: 16OH-DHEAS_1	DHEA	Androgen		Hit reaction time SE
cc.16OH_DHEAS_1_m_32w_i_SG_GA_adj	SAB359	hitrtse	-122.859	-0.267025	hormone metabolite	16OH-DHEAS_1	DHEA: 16OH-DHEAS_1	DHEA	Androgen		Hit reaction time SE
cc.16OH_DHEAS_1_m_32w_i_SG_GA_adj	SAB359	hitrtse	170.995	-0.267025	hormone metabolite	16OH-DHEAS_1	DHEA: 16OH-DHEAS_1	DHEA	Androgen		Hit reaction time SE
cc.16OH_DHEAS_1_m_32w_i_SG_GA_adj	SAB359	hitrtse	5.87348	-0.267025	hormone metabolite	16OH-DHEAS_1	DHEA: 16OH-DHEAS_1	DHEA	Androgen		Hit reaction time SE
cc.16OH_DHEAS_1_m_32w_i_SG_GA_adj	SAB361	hitrtse	34.7072	0.291719	hormone metabolite	16OH-DHEAS_1	DHEA: 16OH-DHEAS_1	DHEA	Androgen		Hit reaction time SE
cc.16OH_DHEAS_1_m_32w_i_SG_GA_adj	SAB361	hitrtse	93.9029	0.291719	hormone metabolite	16OH-DHEAS_1	DHEA: 16OH-DHEAS_1	DHEA	Androgen		Hit reaction time SE
cc.16OH_DHEAS_1_m_32w_i_SG_GA_adj	SAB361	hitrtse	-0.164985	0.291719	hormone metabolite	16OH-DHEAS_1	DHEA: 16OH-DHEAS_1	DHEA	Androgen		Hit reaction time SE
cc.16OH_DHEAS_1_m_32w_i_SG_GA_adj	SAB361	hitrtse	-124.374	0.291719	hormone metabolite	16OH-DHEAS_1	DHEA: 16OH-DHEAS_1	DHEA	Androgen		Hit reaction time SE
cc.16OH_DHEAS_1_m_32w_i_SG_GA_adj	SAB362	hitrtse	-93.5398	-0.883054	hormone metabolite	16OH-DHEAS_1	DHEA: 16OH-DHEAS_1	DHEA	Androgen		Hit reaction time SE
cc.16OH_DHEAS_1_m_32w_i_SG_GA_adj	SAB362	hitrtse	153.468	-0.883054	hormone metabolite	16OH-DHEAS_1	DHEA: 16OH-DHEAS_1	DHEA	Androgen		Hit reaction time SE
cc.16OH_DHEAS_1_m_32w_i_SG_GA_adj	SAB363	hitrtse	115.925	0.896247	hormone metabolite	16OH-DHEAS_1	DHEA: 16OH-DHEAS_1	DHEA	Androgen		Hit reaction time SE
cc.16OH_DHEAS_1_m_32w_i_SG_GA_adj	SAB364	hitrtse	-132.385	-0.936832	hormone metabolite	16OH-DHEAS_1	DHEA: 16OH-DHEAS_1	DHEA	Androgen		Hit reaction time SE
cc.16OH_DHEAS_1_m_32w_i_SG_GA_adj	SAB364	hitrtse	79.8636	-0.936832	hormone metabolite	16OH-DHEAS_1	DHEA: 16OH-DHEAS_1	DHEA	Androgen		Hit reaction time SE
cc.16OH_DHEAS_1_m_32w_i_SG_GA_adj	SAB364	hitrtse	128.821	-0.936832	hormone metabolite	16OH-DHEAS_1	DHEA: 16OH-DHEAS_1	DHEA	Androgen		Hit reaction time SE
cc.16OH_DHEAS_1_m_32w_i_SG_GA_adj	SAB365	hitrtse	-111.866	-0.850471	hormone metabolite	16OH-DHEAS_1	DHEA: 16OH-DHEAS_1	DHEA	Androgen		Hit reaction time SE
cc.16OH_DHEAS_1_m_32w_i_SG_GA_adj	SAB365	hitrtse	-132.01	-0.850471	hormone metabolite	16OH-DHEAS_1	DHEA: 16OH-DHEAS_1	DHEA	Androgen		Hit reaction time SE
cc.16OH_DHEAS_1_m_32w_i_SG_GA_adj	SAB365	hitrtse	229.108	-0.850471	hormone metabolite	16OH-DHEAS_1	DHEA: 16OH-DHEAS_1	DHEA	Androgen		Hit reaction time SE
cc.16OH_DHEAS_1_m_32w_i_SG_GA_adj	SAB367	hitrtse	-125.218	-0.219714	hormone metabolite	16OH-DHEAS_1	DHEA: 16OH-DHEAS_1	DHEA	Androgen		Hit reaction time SE
cc.16OH_DHEAS_1_m_32w_i_SG_GA_adj	SAB367	hitrtse	-146.645	-0.219714	hormone metabolite	16OH-DHEAS_1	DHEA: 16OH-DHEAS_1	DHEA	Androgen		Hit reaction time SE
cc.16OH_DHEAS_1_m_32w_i_SG_GA_adj	SAB367	hitrtse	-66.7249	-0.219714	hormone metabolite	16OH-DHEAS_1	DHEA: 16OH-DHEAS_1	DHEA	Androgen		Hit reaction time SE
cc.16OH_DHEAS_1_m_32w_i_SG_GA_adj	SAB367	hitrtse	-7.70723	-0.219714	hormone metabolite	16OH-DHEAS_1	DHEA: 16OH-DHEAS_1	DHEA	Androgen		Hit reaction time SE
cc.16OH_DHEAS_1_m_32w_i_SG_GA_adj	SAB368	hitrtse	19.0042	-0.158021	hormone metabolite	16OH-DHEAS_1	DHEA: 16OH-DHEAS_1	DHEA	Androgen		Hit reaction time SE
cc.16OH_DHEAS_1_m_32w_i_SG_GA_adj	SAB368	hitrtse	-129.54	-0.158021	hormone metabolite	16OH-DHEAS_1	DHEA: 16OH-DHEAS_1	DHEA	Androgen		Hit reaction time SE
cc.16OH_DHEAS_1_m_32w_i_SG_GA_adj	SAB368	hitrtse	2.75944	-0.158021	hormone metabolite	16OH-DHEAS_1	DHEA: 16OH-DHEAS_1	DHEA	Androgen		Hit reaction time SE
cc.16OH_DHEAS_1_m_32w_i_SG_GA_adj	SAB368	hitrtse	181.493	-0.158021	hormone metabolite	16OH-DHEAS_1	DHEA: 16OH-DHEAS_1	DHEA	Androgen		Hit reaction time SE
cc.16OH_DHEAS_1_m_32w_i_SG_GA_adj	SAB370	hitrtse	40.4454	-1.00683	hormone metabolite	16OH-DHEAS_1	DHEA: 16OH-DHEAS_1	DHEA	Androgen		Hit reaction time SE
cc.16OH_DHEAS_1_m_32w_i_SG_GA_adj	SAB370	hitrtse	-118.677	-1.00683	hormone metabolite	16OH-DHEAS_1	DHEA: 16OH-DHEAS_1	DHEA	Androgen		Hit reaction time SE
cc.16OH_DHEAS_1_m_32w_i_SG_GA_adj	SAB370	hitrtse	81.0898	-1.00683	hormone metabolite	16OH-DHEAS_1	DHEA: 16OH-DHEAS_1	DHEA	Androgen		Hit reaction time SE
cc.16OH_DHEAS_1_m_32w_i_SG_GA_adj	SAB370	hitrtse	159.465	-1.00683	hormone metabolite	16OH-DHEAS_1	DHEA: 16OH-DHEAS_1	DHEA	Androgen		Hit reaction time SE
cc.16OH_DHEAS_1_m_32w_i_SG_GA_adj	SAB371	hitrtse	-102.672	1.64383	hormone metabolite	16OH-DHEAS_1	DHEA: 16OH-DHEAS_1	DHEA	Androgen		Hit reaction time SE
cc.16OH_DHEAS_1_m_32w_i_SG_GA_adj	SAB371	hitrtse	1.52631	1.64383	hormone metabolite	16OH-DHEAS_1	DHEA: 16OH-DHEAS_1	DHEA	Androgen		Hit reaction time SE
cc.16OH_DHEAS_1_m_32w_i_SG_GA_adj	SAB371	hitrtse	145.666	1.64383	hormone metabolite	16OH-DHEAS_1	DHEA: 16OH-DHEAS_1	DHEA	Androgen		Hit reaction time SE
cc.16OH_DHEAS_1_m_32w_i_SG_GA_adj	SAB371	hitrtse	-55.6863	1.64383	hormone metabolite	16OH-DHEAS_1	DHEA: 16OH-DHEAS_1	DHEA	Androgen		Hit reaction time SE
cc.16OH_DHEAS_1_m_32w_i_SG_GA_adj	SAB372	hitrtse	-24.9562	-2.40387	hormone metabolite	16OH-DHEAS_1	DHEA: 16OH-DHEAS_1	DHEA	Androgen		Hit reaction time SE
cc.16OH_DHEAS_1_m_32w_i_SG_GA_adj	SAB372	hitrtse	41.685	-2.40387	hormone metabolite	16OH-DHEAS_1	DHEA: 16OH-DHEAS_1	DHEA	Androgen		Hit reaction time SE
cc.16OH_DHEAS_1_m_32w_i_SG_GA_adj	SAB372	hitrtse	56.6483	-2.40387	hormone metabolite	16OH-DHEAS_1	DHEA: 16OH-DHEAS_1	DHEA	Androgen		Hit reaction time SE
cc.16OH_DHEAS_1_m_32w_i_SG_GA_adj	SAB372	hitrtse	-145.19	-2.40387	hormone metabolite	16OH-DHEAS_1	DHEA: 16OH-DHEAS_1	DHEA	Androgen		Hit reaction time SE
cc.16OH_DHEAS_1_m_32w_i_SG_GA_adj	SAB373	hitrtse	-142.26	-0.914619	hormone metabolite	16OH-DHEAS_1	DHEA: 16OH-DHEAS_1	DHEA	Androgen		Hit reaction time SE
cc.16OH_DHEAS_1_m_32w_i_SG_GA_adj	SAB373	hitrtse	53.2088	-0.914619	hormone metabolite	16OH-DHEAS_1	DHEA: 16OH-DHEAS_1	DHEA	Androgen		Hit reaction time SE
cc.16OH_DHEAS_1_m_32w_i_SG_GA_adj	SAB373	hitrtse	112.389	-0.914619	hormone metabolite	16OH-DHEAS_1	DHEA: 16OH-DHEAS_1	DHEA	Androgen		Hit reaction time SE
cc.16OH_DHEAS_1_m_32w_i_SG_GA_adj	SAB374	hitrtse	-5.97821	-0.009513	hormone metabolite	16OH-DHEAS_1	DHEA: 16OH-DHEAS_1	DHEA	Androgen		Hit reaction time SE
cc.16OH_DHEAS_1_m_32w_i_SG_GA_adj	SAB374	hitrtse	-158.63	-0.009513	hormone metabolite	16OH-DHEAS_1	DHEA: 16OH-DHEAS_1	DHEA	Androgen		Hit reaction time SE
cc.16OH_DHEAS_1_m_32w_i_SG_GA_adj	SAB374	hitrtse	-4.46398	-0.009513	hormone metabolite	16OH-DHEAS_1	DHEA: 16OH-DHEAS_1	DHEA	Androgen		Hit reaction time SE
cc.16OH_DHEAS_1_m_32w_i_SG_GA_adj	SAB374	hitrtse	-73.8455	-0.009513	hormone metabolite	16OH-DHEAS_1	DHEA: 16OH-DHEAS_1	DHEA	Androgen		Hit reaction time SE
cc.16OH_DHEAS_1_m_32w_i_SG_GA_adj	SAB376	hitrtse	-140.608	2.17812	hormone metabolite	16OH-DHEAS_1	DHEA: 16OH-DHEAS_1	DHEA	Androgen		Hit reaction time SE
cc.16OH_DHEAS_1_m_32w_i_SG_GA_adj	SAB376	hitrtse	-44.2783	2.17812	hormone metabolite	16OH-DHEAS_1	DHEA: 16OH-DHEAS_1	DHEA	Androgen		Hit reaction time SE
cc.16OH_DHEAS_1_m_32w_i_SG_GA_adj	SAB376	hitrtse	-169.89	2.17812	hormone metabolite	16OH-DHEAS_1	DHEA: 16OH-DHEAS_1	DHEA	Androgen		Hit reaction time SE
cc.16OH_DHEAS_1_m_32w_i_SG_GA_adj	SAB376	hitrtse	77.945	2.17812	hormone metabolite	16OH-DHEAS_1	DHEA: 16OH-DHEAS_1	DHEA	Androgen		Hit reaction time SE
cc.16OH_DHEAS_1_m_32w_i_SG_GA_adj	SAB377	hitrtse	-24.5839	-2.03764	hormone metabolite	16OH-DHEAS_1	DHEA: 16OH-DHEAS_1	DHEA	Androgen		Hit reaction time SE
cc.16OH_DHEAS_1_m_32w_i_SG_GA_adj	SAB377	hitrtse	34.9012	-2.03764	hormone metabolite	16OH-DHEAS_1	DHEA: 16OH-DHEAS_1	DHEA	Androgen		Hit reaction time SE
cc.16OH_DHEAS_1_m_32w_i_SG_GA_adj	SAB377	hitrtse	-152.605	-2.03764	hormone metabolite	16OH-DHEAS_1	DHEA: 16OH-DHEAS_1	DHEA	Androgen		Hit reaction time SE
cc.16OH_DHEAS_1_m_32w_i_SG_GA_adj	SAB378	hitrtse	-153.072	0.602322	hormone metabolite	16OH-DHEAS_1	DHEA: 16OH-DHEAS_1	DHEA	Androgen		Hit reaction time SE
cc.16OH_DHEAS_1_m_32w_i_SG_GA_adj	SAB378	hitrtse	-11.058	0.602322	hormone metabolite	16OH-DHEAS_1	DHEA: 16OH-DHEAS_1	DHEA	Androgen		Hit reaction time SE
cc.16OH_DHEAS_1_m_32w_i_SG_GA_adj	SAB378	hitrtse	154.191	0.602322	hormone metabolite	16OH-DHEAS_1	DHEA: 16OH-DHEAS_1	DHEA	Androgen		Hit reaction time SE
cc.16OH_DHEAS_1_m_32w_i_SG_GA_adj	SAB378	hitrtse	-46.4507	0.602322	hormone metabolite	16OH-DHEAS_1	DHEA: 16OH-DHEAS_1	DHEA	Androgen		Hit reaction time SE
cc.16OH_DHEAS_1_m_32w_i_SG_GA_adj	SAB38	hitrtse	-43.2975	0.205102	hormone metabolite	16OH-DHEAS_1	DHEA: 16OH-DHEAS_1	DHEA	Androgen		Hit reaction time SE
cc.16OH_DHEAS_1_m_32w_i_SG_GA_adj	SAB38	hitrtse	99.2641	0.205102	hormone metabolite	16OH-DHEAS_1	DHEA: 16OH-DHEAS_1	DHEA	Androgen		Hit reaction time SE
cc.16OH_DHEAS_1_m_32w_i_SG_GA_adj	SAB38	hitrtse	137.262	0.205102	hormone metabolite	16OH-DHEAS_1	DHEA: 16OH-DHEAS_1	DHEA	Androgen		Hit reaction time SE
cc.16OH_DHEAS_1_m_32w_i_SG_GA_adj	SAB380	hitrtse	9.20156	0.920031	hormone metabolite	16OH-DHEAS_1	DHEA: 16OH-DHEAS_1	DHEA	Androgen		Hit reaction time SE
cc.16OH_DHEAS_1_m_32w_i_SG_GA_adj	SAB380	hitrtse	-111.577	0.920031	hormone metabolite	16OH-DHEAS_1	DHEA: 16OH-DHEAS_1	DHEA	Androgen		Hit reaction time SE
cc.16OH_DHEAS_1_m_32w_i_SG_GA_adj	SAB380	hitrtse	29.0029	0.920031	hormone metabolite	16OH-DHEAS_1	DHEA: 16OH-DHEAS_1	DHEA	Androgen		Hit reaction time SE
cc.16OH_DHEAS_1_m_32w_i_SG_GA_adj	SAB380	hitrtse	-129.684	0.920031	hormone metabolite	16OH-DHEAS_1	DHEA: 16OH-DHEAS_1	DHEA	Androgen		Hit reaction time SE
cc.16OH_DHEAS_1_m_32w_i_SG_GA_adj	SAB381	hitrtse	-52.325	-1.25843	hormone metabolite	16OH-DHEAS_1	DHEA: 16OH-DHEAS_1	DHEA	Androgen		Hit reaction time SE
cc.16OH_DHEAS_1_m_32w_i_SG_GA_adj	SAB381	hitrtse	-125.06	-1.25843	hormone metabolite	16OH-DHEAS_1	DHEA: 16OH-DHEAS_1	DHEA	Androgen		Hit reaction time SE
cc.16OH_DHEAS_1_m_32w_i_SG_GA_adj	SAB381	hitrtse	206.58	-1.25843	hormone metabolite	16OH-DHEAS_1	DHEA: 16OH-DHEAS_1	DHEA	Androgen		Hit reaction time SE
cc.16OH_DHEAS_1_m_32w_i_SG_GA_adj	SAB381	hitrtse	-61.3638	-1.25843	hormone metabolite	16OH-DHEAS_1	DHEA: 16OH-DHEAS_1	DHEA	Androgen		Hit reaction time SE
cc.16OH_DHEAS_1_m_32w_i_SG_GA_adj	SAB382	hitrtse	-95.7045	-1.11016	hormone metabolite	16OH-DHEAS_1	DHEA: 16OH-DHEAS_1	DHEA	Androgen		Hit reaction time SE
cc.16OH_DHEAS_1_m_32w_i_SG_GA_adj	SAB383	hitrtse	113.507	-0.568909	hormone metabolite	16OH-DHEAS_1	DHEA: 16OH-DHEAS_1	DHEA	Androgen		Hit reaction time SE
cc.16OH_DHEAS_1_m_32w_i_SG_GA_adj	SAB383	hitrtse	63.4816	-0.568909	hormone metabolite	16OH-DHEAS_1	DHEA: 16OH-DHEAS_1	DHEA	Androgen		Hit reaction time SE
cc.16OH_DHEAS_1_m_32w_i_SG_GA_adj	SAB383	hitrtse	-105.961	-0.568909	hormone metabolite	16OH-DHEAS_1	DHEA: 16OH-DHEAS_1	DHEA	Androgen		Hit reaction time SE
cc.16OH_DHEAS_1_m_32w_i_SG_GA_adj	SAB383	hitrtse	173.643	-0.568909	hormone metabolite	16OH-DHEAS_1	DHEA: 16OH-DHEAS_1	DHEA	Androgen		Hit reaction time SE
cc.16OH_DHEAS_1_m_32w_i_SG_GA_adj	SAB384	hitrtse	6.29702	-1.03832	hormone metabolite	16OH-DHEAS_1	DHEA: 16OH-DHEAS_1	DHEA	Androgen		Hit reaction time SE
cc.16OH_DHEAS_1_m_32w_i_SG_GA_adj	SAB384	hitrtse	-133.398	-1.03832	hormone metabolite	16OH-DHEAS_1	DHEA: 16OH-DHEAS_1	DHEA	Androgen		Hit reaction time SE
cc.16OH_DHEAS_1_m_32w_i_SG_GA_adj	SAB384	hitrtse	182.78	-1.03832	hormone metabolite	16OH-DHEAS_1	DHEA: 16OH-DHEAS_1	DHEA	Androgen		Hit reaction time SE
cc.16OH_DHEAS_1_m_32w_i_SG_GA_adj	SAB384	hitrtse	58.4578	-1.03832	hormone metabolite	16OH-DHEAS_1	DHEA: 16OH-DHEAS_1	DHEA	Androgen		Hit reaction time SE
cc.16OH_DHEAS_1_m_32w_i_SG_GA_adj	SAB386	hitrtse	146.825	1.56121	hormone metabolite	16OH-DHEAS_1	DHEA: 16OH-DHEAS_1	DHEA	Androgen		Hit reaction time SE
cc.16OH_DHEAS_1_m_32w_i_SG_GA_adj	SAB386	hitrtse	38.7072	1.56121	hormone metabolite	16OH-DHEAS_1	DHEA: 16OH-DHEAS_1	DHEA	Androgen		Hit reaction time SE
cc.16OH_DHEAS_1_m_32w_i_SG_GA_adj	SAB386	hitrtse	-53.6669	1.56121	hormone metabolite	16OH-DHEAS_1	DHEA: 16OH-DHEAS_1	DHEA	Androgen		Hit reaction time SE
cc.16OH_DHEAS_1_m_32w_i_SG_GA_adj	SAB386	hitrtse	-154.098	1.56121	hormone metabolite	16OH-DHEAS_1	DHEA: 16OH-DHEAS_1	DHEA	Androgen		Hit reaction time SE
cc.16OH_DHEAS_1_m_32w_i_SG_GA_adj	SAB387	hitrtse	-136.277	0.896967	hormone metabolite	16OH-DHEAS_1	DHEA: 16OH-DHEAS_1	DHEA	Androgen		Hit reaction time SE
cc.16OH_DHEAS_1_m_32w_i_SG_GA_adj	SAB387	hitrtse	105.295	0.896967	hormone metabolite	16OH-DHEAS_1	DHEA: 16OH-DHEAS_1	DHEA	Androgen		Hit reaction time SE
cc.16OH_DHEAS_1_m_32w_i_SG_GA_adj	SAB387	hitrtse	-29.8363	0.896967	hormone metabolite	16OH-DHEAS_1	DHEA: 16OH-DHEAS_1	DHEA	Androgen		Hit reaction time SE
cc.16OH_DHEAS_1_m_32w_i_SG_GA_adj	SAB387	hitrtse	24.3068	0.896967	hormone metabolite	16OH-DHEAS_1	DHEA: 16OH-DHEAS_1	DHEA	Androgen		Hit reaction time SE
cc.16OH_DHEAS_1_m_32w_i_SG_GA_adj	SAB388	hitrtse	54.9331	-1.28514	hormone metabolite	16OH-DHEAS_1	DHEA: 16OH-DHEAS_1	DHEA	Androgen		Hit reaction time SE
cc.16OH_DHEAS_1_m_32w_i_SG_GA_adj	SAB388	hitrtse	-135.053	-1.28514	hormone metabolite	16OH-DHEAS_1	DHEA: 16OH-DHEAS_1	DHEA	Androgen		Hit reaction time SE
cc.16OH_DHEAS_1_m_32w_i_SG_GA_adj	SAB388	hitrtse	-100.808	-1.28514	hormone metabolite	16OH-DHEAS_1	DHEA: 16OH-DHEAS_1	DHEA	Androgen		Hit reaction time SE
cc.16OH_DHEAS_1_m_32w_i_SG_GA_adj	SAB388	hitrtse	-57.8374	-1.28514	hormone metabolite	16OH-DHEAS_1	DHEA: 16OH-DHEAS_1	DHEA	Androgen		Hit reaction time SE
cc.16OH_DHEAS_1_m_32w_i_SG_GA_adj	SAB391	hitrtse	-50.2888	0.185737	hormone metabolite	16OH-DHEAS_1	DHEA: 16OH-DHEAS_1	DHEA	Androgen		Hit reaction time SE
cc.16OH_DHEAS_1_m_32w_i_SG_GA_adj	SAB391	hitrtse	45.8694	0.185737	hormone metabolite	16OH-DHEAS_1	DHEA: 16OH-DHEAS_1	DHEA	Androgen		Hit reaction time SE
cc.16OH_DHEAS_1_m_32w_i_SG_GA_adj	SAB391	hitrtse	199.405	0.185737	hormone metabolite	16OH-DHEAS_1	DHEA: 16OH-DHEAS_1	DHEA	Androgen		Hit reaction time SE
cc.16OH_DHEAS_1_m_32w_i_SG_GA_adj	SAB392	hitrtse	-120.076	0.448824	hormone metabolite	16OH-DHEAS_1	DHEA: 16OH-DHEAS_1	DHEA	Androgen		Hit reaction time SE
cc.16OH_DHEAS_1_m_32w_i_SG_GA_adj	SAB392	hitrtse	229.225	0.448824	hormone metabolite	16OH-DHEAS_1	DHEA: 16OH-DHEAS_1	DHEA	Androgen		Hit reaction time SE
cc.16OH_DHEAS_1_m_32w_i_SG_GA_adj	SAB392	hitrtse	-27.6188	0.448824	hormone metabolite	16OH-DHEAS_1	DHEA: 16OH-DHEAS_1	DHEA	Androgen		Hit reaction time SE
cc.16OH_DHEAS_1_m_32w_i_SG_GA_adj	SAB392	hitrtse	84.7909	0.448824	hormone metabolite	16OH-DHEAS_1	DHEA: 16OH-DHEAS_1	DHEA	Androgen		Hit reaction time SE
cc.16OH_DHEAS_1_m_32w_i_SG_GA_adj	SAB393	hitrtse	-126.211	1.37719	hormone metabolite	16OH-DHEAS_1	DHEA: 16OH-DHEAS_1	DHEA	Androgen		Hit reaction time SE
cc.16OH_DHEAS_1_m_32w_i_SG_GA_adj	SAB393	hitrtse	-118.964	1.37719	hormone metabolite	16OH-DHEAS_1	DHEA: 16OH-DHEAS_1	DHEA	Androgen		Hit reaction time SE
cc.16OH_DHEAS_1_m_32w_i_SG_GA_adj	SAB393	hitrtse	59.4136	1.37719	hormone metabolite	16OH-DHEAS_1	DHEA: 16OH-DHEAS_1	DHEA	Androgen		Hit reaction time SE
cc.16OH_DHEAS_1_m_32w_i_SG_GA_adj	SAB393	hitrtse	21.77	1.37719	hormone metabolite	16OH-DHEAS_1	DHEA: 16OH-DHEAS_1	DHEA	Androgen		Hit reaction time SE
cc.16OH_DHEAS_1_m_32w_i_SG_GA_adj	SAB394	hitrtse	138.362	-3.0268	hormone metabolite	16OH-DHEAS_1	DHEA: 16OH-DHEAS_1	DHEA	Androgen		Hit reaction time SE
cc.16OH_DHEAS_1_m_32w_i_SG_GA_adj	SAB394	hitrtse	-165.834	-3.0268	hormone metabolite	16OH-DHEAS_1	DHEA: 16OH-DHEAS_1	DHEA	Androgen		Hit reaction time SE
cc.16OH_DHEAS_1_m_32w_i_SG_GA_adj	SAB394	hitrtse	70.8635	-3.0268	hormone metabolite	16OH-DHEAS_1	DHEA: 16OH-DHEAS_1	DHEA	Androgen		Hit reaction time SE
cc.16OH_DHEAS_1_m_32w_i_SG_GA_adj	SAB394	hitrtse	-40.3759	-3.0268	hormone metabolite	16OH-DHEAS_1	DHEA: 16OH-DHEAS_1	DHEA	Androgen		Hit reaction time SE
cc.16OH_DHEAS_1_m_32w_i_SG_GA_adj	SAB398	hitrtse	150.431	1.13635	hormone metabolite	16OH-DHEAS_1	DHEA: 16OH-DHEAS_1	DHEA	Androgen		Hit reaction time SE
cc.16OH_DHEAS_1_m_32w_i_SG_GA_adj	SAB398	hitrtse	-5.00022	1.13635	hormone metabolite	16OH-DHEAS_1	DHEA: 16OH-DHEAS_1	DHEA	Androgen		Hit reaction time SE
cc.16OH_DHEAS_1_m_32w_i_SG_GA_adj	SAB398	hitrtse	-39.2922	1.13635	hormone metabolite	16OH-DHEAS_1	DHEA: 16OH-DHEAS_1	DHEA	Androgen		Hit reaction time SE
cc.16OH_DHEAS_1_m_32w_i_SG_GA_adj	SAB399	hitrtse	-134.581	-0.271994	hormone metabolite	16OH-DHEAS_1	DHEA: 16OH-DHEAS_1	DHEA	Androgen		Hit reaction time SE
cc.16OH_DHEAS_1_m_32w_i_SG_GA_adj	SAB399	hitrtse	146.111	-0.271994	hormone metabolite	16OH-DHEAS_1	DHEA: 16OH-DHEAS_1	DHEA	Androgen		Hit reaction time SE
cc.16OH_DHEAS_1_m_32w_i_SG_GA_adj	SAB399	hitrtse	141.073	-0.271994	hormone metabolite	16OH-DHEAS_1	DHEA: 16OH-DHEAS_1	DHEA	Androgen		Hit reaction time SE
cc.16OH_DHEAS_1_m_32w_i_SG_GA_adj	SAB399	hitrtse	-75.6105	-0.271994	hormone metabolite	16OH-DHEAS_1	DHEA: 16OH-DHEAS_1	DHEA	Androgen		Hit reaction time SE
cc.16OH_DHEAS_1_m_32w_i_SG_GA_adj	SAB4	hitrtse	-133.505	0.472213	hormone metabolite	16OH-DHEAS_1	DHEA: 16OH-DHEAS_1	DHEA	Androgen		Hit reaction time SE
cc.16OH_DHEAS_1_m_32w_i_SG_GA_adj	SAB4	hitrtse	40.3102	0.472213	hormone metabolite	16OH-DHEAS_1	DHEA: 16OH-DHEAS_1	DHEA	Androgen		Hit reaction time SE
cc.16OH_DHEAS_1_m_32w_i_SG_GA_adj	SAB4	hitrtse	-49.1202	0.472213	hormone metabolite	16OH-DHEAS_1	DHEA: 16OH-DHEAS_1	DHEA	Androgen		Hit reaction time SE
cc.16OH_DHEAS_1_m_32w_i_SG_GA_adj	SAB400	hitrtse	-78.4298	-0.247219	hormone metabolite	16OH-DHEAS_1	DHEA: 16OH-DHEAS_1	DHEA	Androgen		Hit reaction time SE
cc.16OH_DHEAS_1_m_32w_i_SG_GA_adj	SAB400	hitrtse	-112.423	-0.247219	hormone metabolite	16OH-DHEAS_1	DHEA: 16OH-DHEAS_1	DHEA	Androgen		Hit reaction time SE
cc.16OH_DHEAS_1_m_32w_i_SG_GA_adj	SAB400	hitrtse	149.269	-0.247219	hormone metabolite	16OH-DHEAS_1	DHEA: 16OH-DHEAS_1	DHEA	Androgen		Hit reaction time SE
cc.16OH_DHEAS_1_m_32w_i_SG_GA_adj	SAB400	hitrtse	-9.18147	-0.247219	hormone metabolite	16OH-DHEAS_1	DHEA: 16OH-DHEAS_1	DHEA	Androgen		Hit reaction time SE
cc.16OH_DHEAS_1_m_32w_i_SG_GA_adj	SAB401	hitrtse	-7.65197	-4.35152	hormone metabolite	16OH-DHEAS_1	DHEA: 16OH-DHEAS_1	DHEA	Androgen		Hit reaction time SE
cc.16OH_DHEAS_1_m_32w_i_SG_GA_adj	SAB401	hitrtse	-98.5654	-4.35152	hormone metabolite	16OH-DHEAS_1	DHEA: 16OH-DHEAS_1	DHEA	Androgen		Hit reaction time SE
cc.16OH_DHEAS_1_m_32w_i_SG_GA_adj	SAB401	hitrtse	-152.35	-4.35152	hormone metabolite	16OH-DHEAS_1	DHEA: 16OH-DHEAS_1	DHEA	Androgen		Hit reaction time SE
cc.16OH_DHEAS_1_m_32w_i_SG_GA_adj	SAB401	hitrtse	-62.2061	-4.35152	hormone metabolite	16OH-DHEAS_1	DHEA: 16OH-DHEAS_1	DHEA	Androgen		Hit reaction time SE
cc.16OH_DHEAS_1_m_32w_i_SG_GA_adj	SAB402	hitrtse	34.7301	-1.01718	hormone metabolite	16OH-DHEAS_1	DHEA: 16OH-DHEAS_1	DHEA	Androgen		Hit reaction time SE
cc.16OH_DHEAS_1_m_32w_i_SG_GA_adj	SAB402	hitrtse	-37.1334	-1.01718	hormone metabolite	16OH-DHEAS_1	DHEA: 16OH-DHEAS_1	DHEA	Androgen		Hit reaction time SE
cc.16OH_DHEAS_1_m_32w_i_SG_GA_adj	SAB402	hitrtse	-18.7952	-1.01718	hormone metabolite	16OH-DHEAS_1	DHEA: 16OH-DHEAS_1	DHEA	Androgen		Hit reaction time SE
cc.16OH_DHEAS_1_m_32w_i_SG_GA_adj	SAB404	hitrtse	-146.069	0.181609	hormone metabolite	16OH-DHEAS_1	DHEA: 16OH-DHEAS_1	DHEA	Androgen		Hit reaction time SE
cc.16OH_DHEAS_1_m_32w_i_SG_GA_adj	SAB404	hitrtse	-93.4278	0.181609	hormone metabolite	16OH-DHEAS_1	DHEA: 16OH-DHEAS_1	DHEA	Androgen		Hit reaction time SE
cc.16OH_DHEAS_1_m_32w_i_SG_GA_adj	SAB404	hitrtse	4.09695	0.181609	hormone metabolite	16OH-DHEAS_1	DHEA: 16OH-DHEAS_1	DHEA	Androgen		Hit reaction time SE
cc.16OH_DHEAS_1_m_32w_i_SG_GA_adj	SAB404	hitrtse	-126.975	0.181609	hormone metabolite	16OH-DHEAS_1	DHEA: 16OH-DHEAS_1	DHEA	Androgen		Hit reaction time SE
cc.16OH_DHEAS_1_m_32w_i_SG_GA_adj	SAB406	hitrtse	-133.722	0.0707997	hormone metabolite	16OH-DHEAS_1	DHEA: 16OH-DHEAS_1	DHEA	Androgen		Hit reaction time SE
cc.16OH_DHEAS_1_m_32w_i_SG_GA_adj	SAB406	hitrtse	142.576	0.0707997	hormone metabolite	16OH-DHEAS_1	DHEA: 16OH-DHEAS_1	DHEA	Androgen		Hit reaction time SE
cc.16OH_DHEAS_1_m_32w_i_SG_GA_adj	SAB406	hitrtse	31.4124	0.0707997	hormone metabolite	16OH-DHEAS_1	DHEA: 16OH-DHEAS_1	DHEA	Androgen		Hit reaction time SE
cc.16OH_DHEAS_1_m_32w_i_SG_GA_adj	SAB406	hitrtse	57.5434	0.0707997	hormone metabolite	16OH-DHEAS_1	DHEA: 16OH-DHEAS_1	DHEA	Androgen		Hit reaction time SE
cc.16OH_DHEAS_1_m_32w_i_SG_GA_adj	SAB407	hitrtse	-20.9831	1.47593	hormone metabolite	16OH-DHEAS_1	DHEA: 16OH-DHEAS_1	DHEA	Androgen		Hit reaction time SE
cc.16OH_DHEAS_1_m_32w_i_SG_GA_adj	SAB407	hitrtse	22.3436	1.47593	hormone metabolite	16OH-DHEAS_1	DHEA: 16OH-DHEAS_1	DHEA	Androgen		Hit reaction time SE
cc.16OH_DHEAS_1_m_32w_i_SG_GA_adj	SAB407	hitrtse	60.5332	1.47593	hormone metabolite	16OH-DHEAS_1	DHEA: 16OH-DHEAS_1	DHEA	Androgen		Hit reaction time SE
cc.16OH_DHEAS_1_m_32w_i_SG_GA_adj	SAB407	hitrtse	-147.708	1.47593	hormone metabolite	16OH-DHEAS_1	DHEA: 16OH-DHEAS_1	DHEA	Androgen		Hit reaction time SE
cc.16OH_DHEAS_1_m_32w_i_SG_GA_adj	SAB408	hitrtse	-145.3	0.543413	hormone metabolite	16OH-DHEAS_1	DHEA: 16OH-DHEAS_1	DHEA	Androgen		Hit reaction time SE
cc.16OH_DHEAS_1_m_32w_i_SG_GA_adj	SAB408	hitrtse	-16.1215	0.543413	hormone metabolite	16OH-DHEAS_1	DHEA: 16OH-DHEAS_1	DHEA	Androgen		Hit reaction time SE
cc.16OH_DHEAS_1_m_32w_i_SG_GA_adj	SAB408	hitrtse	-96.4991	0.543413	hormone metabolite	16OH-DHEAS_1	DHEA: 16OH-DHEAS_1	DHEA	Androgen		Hit reaction time SE
cc.16OH_DHEAS_1_m_32w_i_SG_GA_adj	SAB41	hitrtse	-44.6976	0.623419	hormone metabolite	16OH-DHEAS_1	DHEA: 16OH-DHEAS_1	DHEA	Androgen		Hit reaction time SE
cc.16OH_DHEAS_1_m_32w_i_SG_GA_adj	SAB41	hitrtse	-67.4702	0.623419	hormone metabolite	16OH-DHEAS_1	DHEA: 16OH-DHEAS_1	DHEA	Androgen		Hit reaction time SE
cc.16OH_DHEAS_1_m_32w_i_SG_GA_adj	SAB41	hitrtse	-133.736	0.623419	hormone metabolite	16OH-DHEAS_1	DHEA: 16OH-DHEAS_1	DHEA	Androgen		Hit reaction time SE
cc.16OH_DHEAS_1_m_32w_i_SG_GA_adj	SAB411	hitrtse	-137.101	-0.333382	hormone metabolite	16OH-DHEAS_1	DHEA: 16OH-DHEAS_1	DHEA	Androgen		Hit reaction time SE
cc.16OH_DHEAS_1_m_32w_i_SG_GA_adj	SAB411	hitrtse	38.3518	-0.333382	hormone metabolite	16OH-DHEAS_1	DHEA: 16OH-DHEAS_1	DHEA	Androgen		Hit reaction time SE
cc.16OH_DHEAS_1_m_32w_i_SG_GA_adj	SAB411	hitrtse	-130.56	-0.333382	hormone metabolite	16OH-DHEAS_1	DHEA: 16OH-DHEAS_1	DHEA	Androgen		Hit reaction time SE
cc.16OH_DHEAS_1_m_32w_i_SG_GA_adj	SAB411	hitrtse	29.2855	-0.333382	hormone metabolite	16OH-DHEAS_1	DHEA: 16OH-DHEAS_1	DHEA	Androgen		Hit reaction time SE
cc.16OH_DHEAS_1_m_32w_i_SG_GA_adj	SAB412	hitrtse	-65.1836	-0.972268	hormone metabolite	16OH-DHEAS_1	DHEA: 16OH-DHEAS_1	DHEA	Androgen		Hit reaction time SE
cc.16OH_DHEAS_1_m_32w_i_SG_GA_adj	SAB412	hitrtse	22.4577	-0.972268	hormone metabolite	16OH-DHEAS_1	DHEA: 16OH-DHEAS_1	DHEA	Androgen		Hit reaction time SE
cc.16OH_DHEAS_1_m_32w_i_SG_GA_adj	SAB412	hitrtse	-102.468	-0.972268	hormone metabolite	16OH-DHEAS_1	DHEA: 16OH-DHEAS_1	DHEA	Androgen		Hit reaction time SE
cc.16OH_DHEAS_1_m_32w_i_SG_GA_adj	SAB412	hitrtse	-117.516	-0.972268	hormone metabolite	16OH-DHEAS_1	DHEA: 16OH-DHEAS_1	DHEA	Androgen		Hit reaction time SE
cc.16OH_DHEAS_1_m_32w_i_SG_GA_adj	SAB413	hitrtse	25.165	0.751422	hormone metabolite	16OH-DHEAS_1	DHEA: 16OH-DHEAS_1	DHEA	Androgen		Hit reaction time SE
cc.16OH_DHEAS_1_m_32w_i_SG_GA_adj	SAB413	hitrtse	-149.803	0.751422	hormone metabolite	16OH-DHEAS_1	DHEA: 16OH-DHEAS_1	DHEA	Androgen		Hit reaction time SE
cc.16OH_DHEAS_1_m_32w_i_SG_GA_adj	SAB413	hitrtse	-10.6747	0.751422	hormone metabolite	16OH-DHEAS_1	DHEA: 16OH-DHEAS_1	DHEA	Androgen		Hit reaction time SE
cc.16OH_DHEAS_1_m_32w_i_SG_GA_adj	SAB413	hitrtse	199.175	0.751422	hormone metabolite	16OH-DHEAS_1	DHEA: 16OH-DHEAS_1	DHEA	Androgen		Hit reaction time SE
cc.16OH_DHEAS_1_m_32w_i_SG_GA_adj	SAB414	hitrtse	-133.977	-0.0671183	hormone metabolite	16OH-DHEAS_1	DHEA: 16OH-DHEAS_1	DHEA	Androgen		Hit reaction time SE
cc.16OH_DHEAS_1_m_32w_i_SG_GA_adj	SAB414	hitrtse	23.5111	-0.0671183	hormone metabolite	16OH-DHEAS_1	DHEA: 16OH-DHEAS_1	DHEA	Androgen		Hit reaction time SE
cc.16OH_DHEAS_1_m_32w_i_SG_GA_adj	SAB414	hitrtse	-29.3484	-0.0671183	hormone metabolite	16OH-DHEAS_1	DHEA: 16OH-DHEAS_1	DHEA	Androgen		Hit reaction time SE
cc.16OH_DHEAS_1_m_32w_i_SG_GA_adj	SAB414	hitrtse	52.9486	-0.0671183	hormone metabolite	16OH-DHEAS_1	DHEA: 16OH-DHEAS_1	DHEA	Androgen		Hit reaction time SE
cc.16OH_DHEAS_1_m_32w_i_SG_GA_adj	SAB415	hitrtse	134.297	-0.634669	hormone metabolite	16OH-DHEAS_1	DHEA: 16OH-DHEAS_1	DHEA	Androgen		Hit reaction time SE
cc.16OH_DHEAS_1_m_32w_i_SG_GA_adj	SAB415	hitrtse	-120.208	-0.634669	hormone metabolite	16OH-DHEAS_1	DHEA: 16OH-DHEAS_1	DHEA	Androgen		Hit reaction time SE
cc.16OH_DHEAS_1_m_32w_i_SG_GA_adj	SAB415	hitrtse	111.647	-0.634669	hormone metabolite	16OH-DHEAS_1	DHEA: 16OH-DHEAS_1	DHEA	Androgen		Hit reaction time SE
cc.16OH_DHEAS_1_m_32w_i_SG_GA_adj	SAB415	hitrtse	-166.897	-0.634669	hormone metabolite	16OH-DHEAS_1	DHEA: 16OH-DHEAS_1	DHEA	Androgen		Hit reaction time SE
cc.16OH_DHEAS_1_m_32w_i_SG_GA_adj	SAB417	hitrtse	9.81561	-4.84453	hormone metabolite	16OH-DHEAS_1	DHEA: 16OH-DHEAS_1	DHEA	Androgen		Hit reaction time SE
cc.16OH_DHEAS_1_m_32w_i_SG_GA_adj	SAB417	hitrtse	-135.199	-4.84453	hormone metabolite	16OH-DHEAS_1	DHEA: 16OH-DHEAS_1	DHEA	Androgen		Hit reaction time SE
cc.16OH_DHEAS_1_m_32w_i_SG_GA_adj	SAB417	hitrtse	-107.755	-4.84453	hormone metabolite	16OH-DHEAS_1	DHEA: 16OH-DHEAS_1	DHEA	Androgen		Hit reaction time SE
cc.16OH_DHEAS_1_m_32w_i_SG_GA_adj	SAB417	hitrtse	-83.4007	-4.84453	hormone metabolite	16OH-DHEAS_1	DHEA: 16OH-DHEAS_1	DHEA	Androgen		Hit reaction time SE
cc.16OH_DHEAS_1_m_32w_i_SG_GA_adj	SAB418	hitrtse	-69.8509	0.469192	hormone metabolite	16OH-DHEAS_1	DHEA: 16OH-DHEAS_1	DHEA	Androgen		Hit reaction time SE
cc.16OH_DHEAS_1_m_32w_i_SG_GA_adj	SAB418	hitrtse	-142.398	0.469192	hormone metabolite	16OH-DHEAS_1	DHEA: 16OH-DHEAS_1	DHEA	Androgen		Hit reaction time SE
cc.16OH_DHEAS_1_m_32w_i_SG_GA_adj	SAB418	hitrtse	31.9445	0.469192	hormone metabolite	16OH-DHEAS_1	DHEA: 16OH-DHEAS_1	DHEA	Androgen		Hit reaction time SE
cc.16OH_DHEAS_1_m_32w_i_SG_GA_adj	SAB418	hitrtse	-112.907	0.469192	hormone metabolite	16OH-DHEAS_1	DHEA: 16OH-DHEAS_1	DHEA	Androgen		Hit reaction time SE
cc.16OH_DHEAS_1_m_32w_i_SG_GA_adj	SAB419	hitrtse	-40.0702	-0.834967	hormone metabolite	16OH-DHEAS_1	DHEA: 16OH-DHEAS_1	DHEA	Androgen		Hit reaction time SE
cc.16OH_DHEAS_1_m_32w_i_SG_GA_adj	SAB419	hitrtse	-24.7566	-0.834967	hormone metabolite	16OH-DHEAS_1	DHEA: 16OH-DHEAS_1	DHEA	Androgen		Hit reaction time SE
cc.16OH_DHEAS_1_m_32w_i_SG_GA_adj	SAB419	hitrtse	-121.716	-0.834967	hormone metabolite	16OH-DHEAS_1	DHEA: 16OH-DHEAS_1	DHEA	Androgen		Hit reaction time SE
cc.16OH_DHEAS_1_m_32w_i_SG_GA_adj	SAB419	hitrtse	-137.346	-0.834967	hormone metabolite	16OH-DHEAS_1	DHEA: 16OH-DHEAS_1	DHEA	Androgen		Hit reaction time SE
cc.16OH_DHEAS_1_m_32w_i_SG_GA_adj	SAB42	hitrtse	181.58	-1.98605	hormone metabolite	16OH-DHEAS_1	DHEA: 16OH-DHEAS_1	DHEA	Androgen		Hit reaction time SE
cc.16OH_DHEAS_1_m_32w_i_SG_GA_adj	SAB42	hitrtse	-13.9798	-1.98605	hormone metabolite	16OH-DHEAS_1	DHEA: 16OH-DHEAS_1	DHEA	Androgen		Hit reaction time SE
cc.16OH_DHEAS_1_m_32w_i_SG_GA_adj	SAB42	hitrtse	-80.9744	-1.98605	hormone metabolite	16OH-DHEAS_1	DHEA: 16OH-DHEAS_1	DHEA	Androgen		Hit reaction time SE
cc.16OH_DHEAS_1_m_32w_i_SG_GA_adj	SAB420	hitrtse	178.753	-0.709257	hormone metabolite	16OH-DHEAS_1	DHEA: 16OH-DHEAS_1	DHEA	Androgen		Hit reaction time SE
cc.16OH_DHEAS_1_m_32w_i_SG_GA_adj	SAB420	hitrtse	28.6577	-0.709257	hormone metabolite	16OH-DHEAS_1	DHEA: 16OH-DHEAS_1	DHEA	Androgen		Hit reaction time SE
cc.16OH_DHEAS_1_m_32w_i_SG_GA_adj	SAB420	hitrtse	-95.9557	-0.709257	hormone metabolite	16OH-DHEAS_1	DHEA: 16OH-DHEAS_1	DHEA	Androgen		Hit reaction time SE
cc.16OH_DHEAS_1_m_32w_i_SG_GA_adj	SAB420	hitrtse	308.183	-0.709257	hormone metabolite	16OH-DHEAS_1	DHEA: 16OH-DHEAS_1	DHEA	Androgen		Hit reaction time SE
cc.16OH_DHEAS_1_m_32w_i_SG_GA_adj	SAB423	hitrtse	3.19456	-0.625762	hormone metabolite	16OH-DHEAS_1	DHEA: 16OH-DHEAS_1	DHEA	Androgen		Hit reaction time SE
cc.16OH_DHEAS_1_m_32w_i_SG_GA_adj	SAB423	hitrtse	-85.9164	-0.625762	hormone metabolite	16OH-DHEAS_1	DHEA: 16OH-DHEAS_1	DHEA	Androgen		Hit reaction time SE
cc.16OH_DHEAS_1_m_32w_i_SG_GA_adj	SAB423	hitrtse	67.9124	-0.625762	hormone metabolite	16OH-DHEAS_1	DHEA: 16OH-DHEAS_1	DHEA	Androgen		Hit reaction time SE
cc.16OH_DHEAS_1_m_32w_i_SG_GA_adj	SAB423	hitrtse	-132.958	-0.625762	hormone metabolite	16OH-DHEAS_1	DHEA: 16OH-DHEAS_1	DHEA	Androgen		Hit reaction time SE
cc.16OH_DHEAS_1_m_32w_i_SG_GA_adj	SAB424	hitrtse	104.407	0.701896	hormone metabolite	16OH-DHEAS_1	DHEA: 16OH-DHEAS_1	DHEA	Androgen		Hit reaction time SE
cc.16OH_DHEAS_1_m_32w_i_SG_GA_adj	SAB424	hitrtse	-87.5513	0.701896	hormone metabolite	16OH-DHEAS_1	DHEA: 16OH-DHEAS_1	DHEA	Androgen		Hit reaction time SE
cc.16OH_DHEAS_1_m_32w_i_SG_GA_adj	SAB424	hitrtse	-83.8896	0.701896	hormone metabolite	16OH-DHEAS_1	DHEA: 16OH-DHEAS_1	DHEA	Androgen		Hit reaction time SE
cc.16OH_DHEAS_1_m_32w_i_SG_GA_adj	SAB424	hitrtse	-27.9314	0.701896	hormone metabolite	16OH-DHEAS_1	DHEA: 16OH-DHEAS_1	DHEA	Androgen		Hit reaction time SE
cc.16OH_DHEAS_1_m_32w_i_SG_GA_adj	SAB425	hitrtse	24.3628	0.552312	hormone metabolite	16OH-DHEAS_1	DHEA: 16OH-DHEAS_1	DHEA	Androgen		Hit reaction time SE
cc.16OH_DHEAS_1_m_32w_i_SG_GA_adj	SAB425	hitrtse	-127.166	0.552312	hormone metabolite	16OH-DHEAS_1	DHEA: 16OH-DHEAS_1	DHEA	Androgen		Hit reaction time SE
cc.16OH_DHEAS_1_m_32w_i_SG_GA_adj	SAB425	hitrtse	47.1777	0.552312	hormone metabolite	16OH-DHEAS_1	DHEA: 16OH-DHEAS_1	DHEA	Androgen		Hit reaction time SE
cc.16OH_DHEAS_1_m_32w_i_SG_GA_adj	SAB425	hitrtse	-164.326	0.552312	hormone metabolite	16OH-DHEAS_1	DHEA: 16OH-DHEAS_1	DHEA	Androgen		Hit reaction time SE
cc.16OH_DHEAS_1_m_32w_i_SG_GA_adj	SAB426	hitrtse	-106.77	0.189922	hormone metabolite	16OH-DHEAS_1	DHEA: 16OH-DHEAS_1	DHEA	Androgen		Hit reaction time SE
cc.16OH_DHEAS_1_m_32w_i_SG_GA_adj	SAB426	hitrtse	161.188	0.189922	hormone metabolite	16OH-DHEAS_1	DHEA: 16OH-DHEAS_1	DHEA	Androgen		Hit reaction time SE
cc.16OH_DHEAS_1_m_32w_i_SG_GA_adj	SAB426	hitrtse	-119.548	0.189922	hormone metabolite	16OH-DHEAS_1	DHEA: 16OH-DHEAS_1	DHEA	Androgen		Hit reaction time SE
cc.16OH_DHEAS_1_m_32w_i_SG_GA_adj	SAB426	hitrtse	153.608	0.189922	hormone metabolite	16OH-DHEAS_1	DHEA: 16OH-DHEAS_1	DHEA	Androgen		Hit reaction time SE
cc.16OH_DHEAS_1_m_32w_i_SG_GA_adj	SAB428	hitrtse	179.585	-1.74362	hormone metabolite	16OH-DHEAS_1	DHEA: 16OH-DHEAS_1	DHEA	Androgen		Hit reaction time SE
cc.16OH_DHEAS_1_m_32w_i_SG_GA_adj	SAB428	hitrtse	-34.191	-1.74362	hormone metabolite	16OH-DHEAS_1	DHEA: 16OH-DHEAS_1	DHEA	Androgen		Hit reaction time SE
cc.16OH_DHEAS_1_m_32w_i_SG_GA_adj	SAB428	hitrtse	-77.1855	-1.74362	hormone metabolite	16OH-DHEAS_1	DHEA: 16OH-DHEAS_1	DHEA	Androgen		Hit reaction time SE
cc.16OH_DHEAS_1_m_32w_i_SG_GA_adj	SAB428	hitrtse	-153.432	-1.74362	hormone metabolite	16OH-DHEAS_1	DHEA: 16OH-DHEAS_1	DHEA	Androgen		Hit reaction time SE
cc.16OH_DHEAS_1_m_32w_i_SG_GA_adj	SAB429	hitrtse	171.071	-0.809507	hormone metabolite	16OH-DHEAS_1	DHEA: 16OH-DHEAS_1	DHEA	Androgen		Hit reaction time SE
cc.16OH_DHEAS_1_m_32w_i_SG_GA_adj	SAB429	hitrtse	-171.771	-0.809507	hormone metabolite	16OH-DHEAS_1	DHEA: 16OH-DHEAS_1	DHEA	Androgen		Hit reaction time SE
cc.16OH_DHEAS_1_m_32w_i_SG_GA_adj	SAB429	hitrtse	-45.7387	-0.809507	hormone metabolite	16OH-DHEAS_1	DHEA: 16OH-DHEAS_1	DHEA	Androgen		Hit reaction time SE
cc.16OH_DHEAS_1_m_32w_i_SG_GA_adj	SAB429	hitrtse	-124.475	-0.809507	hormone metabolite	16OH-DHEAS_1	DHEA: 16OH-DHEAS_1	DHEA	Androgen		Hit reaction time SE
cc.16OH_DHEAS_1_m_32w_i_SG_GA_adj	SAB430	hitrtse	-104.463	0.142019	hormone metabolite	16OH-DHEAS_1	DHEA: 16OH-DHEAS_1	DHEA	Androgen		Hit reaction time SE
cc.16OH_DHEAS_1_m_32w_i_SG_GA_adj	SAB430	hitrtse	-6.3196	0.142019	hormone metabolite	16OH-DHEAS_1	DHEA: 16OH-DHEAS_1	DHEA	Androgen		Hit reaction time SE
cc.16OH_DHEAS_1_m_32w_i_SG_GA_adj	SAB430	hitrtse	12.4559	0.142019	hormone metabolite	16OH-DHEAS_1	DHEA: 16OH-DHEAS_1	DHEA	Androgen		Hit reaction time SE
cc.16OH_DHEAS_1_m_32w_i_SG_GA_adj	SAB431	hitrtse	59.0016	-0.444583	hormone metabolite	16OH-DHEAS_1	DHEA: 16OH-DHEAS_1	DHEA	Androgen		Hit reaction time SE
cc.16OH_DHEAS_1_m_32w_i_SG_GA_adj	SAB431	hitrtse	-129.448	-0.444583	hormone metabolite	16OH-DHEAS_1	DHEA: 16OH-DHEAS_1	DHEA	Androgen		Hit reaction time SE
cc.16OH_DHEAS_1_m_32w_i_SG_GA_adj	SAB431	hitrtse	23.5681	-0.444583	hormone metabolite	16OH-DHEAS_1	DHEA: 16OH-DHEAS_1	DHEA	Androgen		Hit reaction time SE
cc.16OH_DHEAS_1_m_32w_i_SG_GA_adj	SAB431	hitrtse	-137.9	-0.444583	hormone metabolite	16OH-DHEAS_1	DHEA: 16OH-DHEAS_1	DHEA	Androgen		Hit reaction time SE
cc.16OH_DHEAS_1_m_32w_i_SG_GA_adj	SAB432	hitrtse	-158.022	0.308253	hormone metabolite	16OH-DHEAS_1	DHEA: 16OH-DHEAS_1	DHEA	Androgen		Hit reaction time SE
cc.16OH_DHEAS_1_m_32w_i_SG_GA_adj	SAB432	hitrtse	-20.4993	0.308253	hormone metabolite	16OH-DHEAS_1	DHEA: 16OH-DHEAS_1	DHEA	Androgen		Hit reaction time SE
cc.16OH_DHEAS_1_m_32w_i_SG_GA_adj	SAB432	hitrtse	55.8605	0.308253	hormone metabolite	16OH-DHEAS_1	DHEA: 16OH-DHEAS_1	DHEA	Androgen		Hit reaction time SE
cc.16OH_DHEAS_1_m_32w_i_SG_GA_adj	SAB432	hitrtse	-149.837	0.308253	hormone metabolite	16OH-DHEAS_1	DHEA: 16OH-DHEAS_1	DHEA	Androgen		Hit reaction time SE
cc.16OH_DHEAS_1_m_32w_i_SG_GA_adj	SAB433	hitrtse	224.527	-1.69593	hormone metabolite	16OH-DHEAS_1	DHEA: 16OH-DHEAS_1	DHEA	Androgen		Hit reaction time SE
cc.16OH_DHEAS_1_m_32w_i_SG_GA_adj	SAB433	hitrtse	122.664	-1.69593	hormone metabolite	16OH-DHEAS_1	DHEA: 16OH-DHEAS_1	DHEA	Androgen		Hit reaction time SE
cc.16OH_DHEAS_1_m_32w_i_SG_GA_adj	SAB433	hitrtse	215.644	-1.69593	hormone metabolite	16OH-DHEAS_1	DHEA: 16OH-DHEAS_1	DHEA	Androgen		Hit reaction time SE
cc.16OH_DHEAS_1_m_32w_i_SG_GA_adj	SAB433	hitrtse	-149.649	-1.69593	hormone metabolite	16OH-DHEAS_1	DHEA: 16OH-DHEAS_1	DHEA	Androgen		Hit reaction time SE
cc.16OH_DHEAS_1_m_32w_i_SG_GA_adj	SAB434	hitrtse	0.642029	-1.14187	hormone metabolite	16OH-DHEAS_1	DHEA: 16OH-DHEAS_1	DHEA	Androgen		Hit reaction time SE
cc.16OH_DHEAS_1_m_32w_i_SG_GA_adj	SAB434	hitrtse	71.4954	-1.14187	hormone metabolite	16OH-DHEAS_1	DHEA: 16OH-DHEAS_1	DHEA	Androgen		Hit reaction time SE
cc.16OH_DHEAS_1_m_32w_i_SG_GA_adj	SAB434	hitrtse	-139.192	-1.14187	hormone metabolite	16OH-DHEAS_1	DHEA: 16OH-DHEAS_1	DHEA	Androgen		Hit reaction time SE
cc.16OH_DHEAS_1_m_32w_i_SG_GA_adj	SAB437	hitrtse	-150.751	-0.113192	hormone metabolite	16OH-DHEAS_1	DHEA: 16OH-DHEAS_1	DHEA	Androgen		Hit reaction time SE
cc.16OH_DHEAS_1_m_32w_i_SG_GA_adj	SAB437	hitrtse	105.454	-0.113192	hormone metabolite	16OH-DHEAS_1	DHEA: 16OH-DHEAS_1	DHEA	Androgen		Hit reaction time SE
cc.16OH_DHEAS_1_m_32w_i_SG_GA_adj	SAB437	hitrtse	-50.3735	-0.113192	hormone metabolite	16OH-DHEAS_1	DHEA: 16OH-DHEAS_1	DHEA	Androgen		Hit reaction time SE
cc.16OH_DHEAS_1_m_32w_i_SG_GA_adj	SAB437	hitrtse	-55.8075	-0.113192	hormone metabolite	16OH-DHEAS_1	DHEA: 16OH-DHEAS_1	DHEA	Androgen		Hit reaction time SE
cc.16OH_DHEAS_1_m_32w_i_SG_GA_adj	SAB44	hitrtse	-72.3046	0.853633	hormone metabolite	16OH-DHEAS_1	DHEA: 16OH-DHEAS_1	DHEA	Androgen		Hit reaction time SE
cc.16OH_DHEAS_1_m_32w_i_SG_GA_adj	SAB44	hitrtse	-47.2485	0.853633	hormone metabolite	16OH-DHEAS_1	DHEA: 16OH-DHEAS_1	DHEA	Androgen		Hit reaction time SE
cc.16OH_DHEAS_1_m_32w_i_SG_GA_adj	SAB440	hitrtse	-96.1517	0.437894	hormone metabolite	16OH-DHEAS_1	DHEA: 16OH-DHEAS_1	DHEA	Androgen		Hit reaction time SE
cc.16OH_DHEAS_1_m_32w_i_SG_GA_adj	SAB440	hitrtse	-179.749	0.437894	hormone metabolite	16OH-DHEAS_1	DHEA: 16OH-DHEAS_1	DHEA	Androgen		Hit reaction time SE
cc.16OH_DHEAS_1_m_32w_i_SG_GA_adj	SAB440	hitrtse	68.2876	0.437894	hormone metabolite	16OH-DHEAS_1	DHEA: 16OH-DHEAS_1	DHEA	Androgen		Hit reaction time SE
cc.16OH_DHEAS_1_m_32w_i_SG_GA_adj	SAB440	hitrtse	-57.6917	0.437894	hormone metabolite	16OH-DHEAS_1	DHEA: 16OH-DHEAS_1	DHEA	Androgen		Hit reaction time SE
cc.16OH_DHEAS_1_m_32w_i_SG_GA_adj	SAB442	hitrtse	29.1379	-4.64701	hormone metabolite	16OH-DHEAS_1	DHEA: 16OH-DHEAS_1	DHEA	Androgen		Hit reaction time SE
cc.16OH_DHEAS_1_m_32w_i_SG_GA_adj	SAB442	hitrtse	-133.496	-4.64701	hormone metabolite	16OH-DHEAS_1	DHEA: 16OH-DHEAS_1	DHEA	Androgen		Hit reaction time SE
cc.16OH_DHEAS_1_m_32w_i_SG_GA_adj	SAB443	hitrtse	-164.765	-0.150646	hormone metabolite	16OH-DHEAS_1	DHEA: 16OH-DHEAS_1	DHEA	Androgen		Hit reaction time SE
cc.16OH_DHEAS_1_m_32w_i_SG_GA_adj	SAB443	hitrtse	-141.819	-0.150646	hormone metabolite	16OH-DHEAS_1	DHEA: 16OH-DHEAS_1	DHEA	Androgen		Hit reaction time SE
cc.16OH_DHEAS_1_m_32w_i_SG_GA_adj	SAB443	hitrtse	113.352	-0.150646	hormone metabolite	16OH-DHEAS_1	DHEA: 16OH-DHEAS_1	DHEA	Androgen		Hit reaction time SE
cc.16OH_DHEAS_1_m_32w_i_SG_GA_adj	SAB444	hitrtse	77.9151	-0.217325	hormone metabolite	16OH-DHEAS_1	DHEA: 16OH-DHEAS_1	DHEA	Androgen		Hit reaction time SE
cc.16OH_DHEAS_1_m_32w_i_SG_GA_adj	SAB444	hitrtse	-56.0359	-0.217325	hormone metabolite	16OH-DHEAS_1	DHEA: 16OH-DHEAS_1	DHEA	Androgen		Hit reaction time SE
cc.16OH_DHEAS_1_m_32w_i_SG_GA_adj	SAB444	hitrtse	-16.9575	-0.217325	hormone metabolite	16OH-DHEAS_1	DHEA: 16OH-DHEAS_1	DHEA	Androgen		Hit reaction time SE
cc.16OH_DHEAS_1_m_32w_i_SG_GA_adj	SAB444	hitrtse	-123.53	-0.217325	hormone metabolite	16OH-DHEAS_1	DHEA: 16OH-DHEAS_1	DHEA	Androgen		Hit reaction time SE
cc.16OH_DHEAS_1_m_32w_i_SG_GA_adj	SAB445	hitrtse	-146.65	0.264479	hormone metabolite	16OH-DHEAS_1	DHEA: 16OH-DHEAS_1	DHEA	Androgen		Hit reaction time SE
cc.16OH_DHEAS_1_m_32w_i_SG_GA_adj	SAB445	hitrtse	-114.036	0.264479	hormone metabolite	16OH-DHEAS_1	DHEA: 16OH-DHEAS_1	DHEA	Androgen		Hit reaction time SE
cc.16OH_DHEAS_1_m_32w_i_SG_GA_adj	SAB445	hitrtse	0.166157	0.264479	hormone metabolite	16OH-DHEAS_1	DHEA: 16OH-DHEAS_1	DHEA	Androgen		Hit reaction time SE
cc.16OH_DHEAS_1_m_32w_i_SG_GA_adj	SAB445	hitrtse	-102.767	0.264479	hormone metabolite	16OH-DHEAS_1	DHEA: 16OH-DHEAS_1	DHEA	Androgen		Hit reaction time SE
cc.16OH_DHEAS_1_m_32w_i_SG_GA_adj	SAB446	hitrtse	-137.803	0.323274	hormone metabolite	16OH-DHEAS_1	DHEA: 16OH-DHEAS_1	DHEA	Androgen		Hit reaction time SE
cc.16OH_DHEAS_1_m_32w_i_SG_GA_adj	SAB447	hitrtse	-20.5215	0.288123	hormone metabolite	16OH-DHEAS_1	DHEA: 16OH-DHEAS_1	DHEA	Androgen		Hit reaction time SE
cc.16OH_DHEAS_1_m_32w_i_SG_GA_adj	SAB447	hitrtse	40.778	0.288123	hormone metabolite	16OH-DHEAS_1	DHEA: 16OH-DHEAS_1	DHEA	Androgen		Hit reaction time SE
cc.16OH_DHEAS_1_m_32w_i_SG_GA_adj	SAB448	hitrtse	-57.1337	0.785255	hormone metabolite	16OH-DHEAS_1	DHEA: 16OH-DHEAS_1	DHEA	Androgen		Hit reaction time SE
cc.16OH_DHEAS_1_m_32w_i_SG_GA_adj	SAB448	hitrtse	38.3889	0.785255	hormone metabolite	16OH-DHEAS_1	DHEA: 16OH-DHEAS_1	DHEA	Androgen		Hit reaction time SE
cc.16OH_DHEAS_1_m_32w_i_SG_GA_adj	SAB448	hitrtse	238.389	0.785255	hormone metabolite	16OH-DHEAS_1	DHEA: 16OH-DHEAS_1	DHEA	Androgen		Hit reaction time SE
cc.16OH_DHEAS_1_m_32w_i_SG_GA_adj	SAB449	hitrtse	-160.803	-0.403707	hormone metabolite	16OH-DHEAS_1	DHEA: 16OH-DHEAS_1	DHEA	Androgen		Hit reaction time SE
cc.16OH_DHEAS_1_m_32w_i_SG_GA_adj	SAB449	hitrtse	129.973	-0.403707	hormone metabolite	16OH-DHEAS_1	DHEA: 16OH-DHEAS_1	DHEA	Androgen		Hit reaction time SE
cc.16OH_DHEAS_1_m_32w_i_SG_GA_adj	SAB449	hitrtse	-32.4104	-0.403707	hormone metabolite	16OH-DHEAS_1	DHEA: 16OH-DHEAS_1	DHEA	Androgen		Hit reaction time SE
cc.16OH_DHEAS_1_m_32w_i_SG_GA_adj	SAB449	hitrtse	43.6871	-0.403707	hormone metabolite	16OH-DHEAS_1	DHEA: 16OH-DHEAS_1	DHEA	Androgen		Hit reaction time SE
cc.16OH_DHEAS_1_m_32w_i_SG_GA_adj	SAB450	hitrtse	143.723	0.151779	hormone metabolite	16OH-DHEAS_1	DHEA: 16OH-DHEAS_1	DHEA	Androgen		Hit reaction time SE
cc.16OH_DHEAS_1_m_32w_i_SG_GA_adj	SAB450	hitrtse	-45.5602	0.151779	hormone metabolite	16OH-DHEAS_1	DHEA: 16OH-DHEAS_1	DHEA	Androgen		Hit reaction time SE
cc.16OH_DHEAS_1_m_32w_i_SG_GA_adj	SAB450	hitrtse	-134.1	0.151779	hormone metabolite	16OH-DHEAS_1	DHEA: 16OH-DHEAS_1	DHEA	Androgen		Hit reaction time SE
cc.16OH_DHEAS_1_m_32w_i_SG_GA_adj	SAB450	hitrtse	64.942	0.151779	hormone metabolite	16OH-DHEAS_1	DHEA: 16OH-DHEAS_1	DHEA	Androgen		Hit reaction time SE
cc.16OH_DHEAS_1_m_32w_i_SG_GA_adj	SAB451	hitrtse	23.2278	-0.259677	hormone metabolite	16OH-DHEAS_1	DHEA: 16OH-DHEAS_1	DHEA	Androgen		Hit reaction time SE
cc.16OH_DHEAS_1_m_32w_i_SG_GA_adj	SAB451	hitrtse	-92.0615	-0.259677	hormone metabolite	16OH-DHEAS_1	DHEA: 16OH-DHEAS_1	DHEA	Androgen		Hit reaction time SE
cc.16OH_DHEAS_1_m_32w_i_SG_GA_adj	SAB451	hitrtse	-44.9117	-0.259677	hormone metabolite	16OH-DHEAS_1	DHEA: 16OH-DHEAS_1	DHEA	Androgen		Hit reaction time SE
cc.16OH_DHEAS_1_m_32w_i_SG_GA_adj	SAB451	hitrtse	-140.901	-0.259677	hormone metabolite	16OH-DHEAS_1	DHEA: 16OH-DHEAS_1	DHEA	Androgen		Hit reaction time SE
cc.16OH_DHEAS_1_m_32w_i_SG_GA_adj	SAB452	hitrtse	-174.369	-2.79336	hormone metabolite	16OH-DHEAS_1	DHEA: 16OH-DHEAS_1	DHEA	Androgen		Hit reaction time SE
cc.16OH_DHEAS_1_m_32w_i_SG_GA_adj	SAB452	hitrtse	0.1642	-2.79336	hormone metabolite	16OH-DHEAS_1	DHEA: 16OH-DHEAS_1	DHEA	Androgen		Hit reaction time SE
cc.16OH_DHEAS_1_m_32w_i_SG_GA_adj	SAB452	hitrtse	53.6907	-2.79336	hormone metabolite	16OH-DHEAS_1	DHEA: 16OH-DHEAS_1	DHEA	Androgen		Hit reaction time SE
cc.16OH_DHEAS_1_m_32w_i_SG_GA_adj	SAB452	hitrtse	209.626	-2.79336	hormone metabolite	16OH-DHEAS_1	DHEA: 16OH-DHEAS_1	DHEA	Androgen		Hit reaction time SE
cc.16OH_DHEAS_1_m_32w_i_SG_GA_adj	SAB453	hitrtse	-131.859	1.58714	hormone metabolite	16OH-DHEAS_1	DHEA: 16OH-DHEAS_1	DHEA	Androgen		Hit reaction time SE
cc.16OH_DHEAS_1_m_32w_i_SG_GA_adj	SAB453	hitrtse	146.088	1.58714	hormone metabolite	16OH-DHEAS_1	DHEA: 16OH-DHEAS_1	DHEA	Androgen		Hit reaction time SE
cc.16OH_DHEAS_1_m_32w_i_SG_GA_adj	SAB453	hitrtse	84.4923	1.58714	hormone metabolite	16OH-DHEAS_1	DHEA: 16OH-DHEAS_1	DHEA	Androgen		Hit reaction time SE
cc.16OH_DHEAS_1_m_32w_i_SG_GA_adj	SAB453	hitrtse	17.403	1.58714	hormone metabolite	16OH-DHEAS_1	DHEA: 16OH-DHEAS_1	DHEA	Androgen		Hit reaction time SE
cc.16OH_DHEAS_1_m_32w_i_SG_GA_adj	SAB454	hitrtse	179.433	0.825445	hormone metabolite	16OH-DHEAS_1	DHEA: 16OH-DHEAS_1	DHEA	Androgen		Hit reaction time SE
cc.16OH_DHEAS_1_m_32w_i_SG_GA_adj	SAB454	hitrtse	-104.014	0.825445	hormone metabolite	16OH-DHEAS_1	DHEA: 16OH-DHEAS_1	DHEA	Androgen		Hit reaction time SE
cc.16OH_DHEAS_1_m_32w_i_SG_GA_adj	SAB454	hitrtse	71.9895	0.825445	hormone metabolite	16OH-DHEAS_1	DHEA: 16OH-DHEAS_1	DHEA	Androgen		Hit reaction time SE
cc.16OH_DHEAS_1_m_32w_i_SG_GA_adj	SAB454	hitrtse	-114.252	0.825445	hormone metabolite	16OH-DHEAS_1	DHEA: 16OH-DHEAS_1	DHEA	Androgen		Hit reaction time SE
cc.16OH_DHEAS_1_m_32w_i_SG_GA_adj	SAB458	hitrtse	52.5192	-1.52264	hormone metabolite	16OH-DHEAS_1	DHEA: 16OH-DHEAS_1	DHEA	Androgen		Hit reaction time SE
cc.16OH_DHEAS_1_m_32w_i_SG_GA_adj	SAB459	hitrtse	37.071	0.301158	hormone metabolite	16OH-DHEAS_1	DHEA: 16OH-DHEAS_1	DHEA	Androgen		Hit reaction time SE
cc.16OH_DHEAS_1_m_32w_i_SG_GA_adj	SAB459	hitrtse	152.963	0.301158	hormone metabolite	16OH-DHEAS_1	DHEA: 16OH-DHEAS_1	DHEA	Androgen		Hit reaction time SE
cc.16OH_DHEAS_1_m_32w_i_SG_GA_adj	SAB459	hitrtse	-142.83	0.301158	hormone metabolite	16OH-DHEAS_1	DHEA: 16OH-DHEAS_1	DHEA	Androgen		Hit reaction time SE
cc.16OH_DHEAS_1_m_32w_i_SG_GA_adj	SAB460	hitrtse	-8.08985	-1.09108	hormone metabolite	16OH-DHEAS_1	DHEA: 16OH-DHEAS_1	DHEA	Androgen		Hit reaction time SE
cc.16OH_DHEAS_1_m_32w_i_SG_GA_adj	SAB460	hitrtse	94.4172	-1.09108	hormone metabolite	16OH-DHEAS_1	DHEA: 16OH-DHEAS_1	DHEA	Androgen		Hit reaction time SE
cc.16OH_DHEAS_1_m_32w_i_SG_GA_adj	SAB460	hitrtse	-35.9238	-1.09108	hormone metabolite	16OH-DHEAS_1	DHEA: 16OH-DHEAS_1	DHEA	Androgen		Hit reaction time SE
cc.16OH_DHEAS_1_m_32w_i_SG_GA_adj	SAB460	hitrtse	-138.339	-1.09108	hormone metabolite	16OH-DHEAS_1	DHEA: 16OH-DHEAS_1	DHEA	Androgen		Hit reaction time SE
cc.16OH_DHEAS_1_m_32w_i_SG_GA_adj	SAB462	hitrtse	45.6442	1.07936	hormone metabolite	16OH-DHEAS_1	DHEA: 16OH-DHEAS_1	DHEA	Androgen		Hit reaction time SE
cc.16OH_DHEAS_1_m_32w_i_SG_GA_adj	SAB462	hitrtse	-147.673	1.07936	hormone metabolite	16OH-DHEAS_1	DHEA: 16OH-DHEAS_1	DHEA	Androgen		Hit reaction time SE
cc.16OH_DHEAS_1_m_32w_i_SG_GA_adj	SAB462	hitrtse	245.532	1.07936	hormone metabolite	16OH-DHEAS_1	DHEA: 16OH-DHEAS_1	DHEA	Androgen		Hit reaction time SE
cc.16OH_DHEAS_1_m_32w_i_SG_GA_adj	SAB462	hitrtse	230.356	1.07936	hormone metabolite	16OH-DHEAS_1	DHEA: 16OH-DHEAS_1	DHEA	Androgen		Hit reaction time SE
cc.16OH_DHEAS_1_m_32w_i_SG_GA_adj	SAB463	hitrtse	-160.74	0.135717	hormone metabolite	16OH-DHEAS_1	DHEA: 16OH-DHEAS_1	DHEA	Androgen		Hit reaction time SE
cc.16OH_DHEAS_1_m_32w_i_SG_GA_adj	SAB463	hitrtse	79.1299	0.135717	hormone metabolite	16OH-DHEAS_1	DHEA: 16OH-DHEAS_1	DHEA	Androgen		Hit reaction time SE
cc.16OH_DHEAS_1_m_32w_i_SG_GA_adj	SAB464	hitrtse	167.994	-1.32451	hormone metabolite	16OH-DHEAS_1	DHEA: 16OH-DHEAS_1	DHEA	Androgen		Hit reaction time SE
cc.16OH_DHEAS_1_m_32w_i_SG_GA_adj	SAB464	hitrtse	-140.625	-1.32451	hormone metabolite	16OH-DHEAS_1	DHEA: 16OH-DHEAS_1	DHEA	Androgen		Hit reaction time SE
cc.16OH_DHEAS_1_m_32w_i_SG_GA_adj	SAB464	hitrtse	71.9493	-1.32451	hormone metabolite	16OH-DHEAS_1	DHEA: 16OH-DHEAS_1	DHEA	Androgen		Hit reaction time SE
cc.16OH_DHEAS_1_m_32w_i_SG_GA_adj	SAB464	hitrtse	-96.446	-1.32451	hormone metabolite	16OH-DHEAS_1	DHEA: 16OH-DHEAS_1	DHEA	Androgen		Hit reaction time SE
cc.16OH_DHEAS_1_m_32w_i_SG_GA_adj	SAB465	hitrtse	176.166	0.120087	hormone metabolite	16OH-DHEAS_1	DHEA: 16OH-DHEAS_1	DHEA	Androgen		Hit reaction time SE
cc.16OH_DHEAS_1_m_32w_i_SG_GA_adj	SAB465	hitrtse	43.1927	0.120087	hormone metabolite	16OH-DHEAS_1	DHEA: 16OH-DHEAS_1	DHEA	Androgen		Hit reaction time SE
cc.16OH_DHEAS_1_m_32w_i_SG_GA_adj	SAB465	hitrtse	-144.462	0.120087	hormone metabolite	16OH-DHEAS_1	DHEA: 16OH-DHEAS_1	DHEA	Androgen		Hit reaction time SE
cc.16OH_DHEAS_1_m_32w_i_SG_GA_adj	SAB465	hitrtse	-39.0089	0.120087	hormone metabolite	16OH-DHEAS_1	DHEA: 16OH-DHEAS_1	DHEA	Androgen		Hit reaction time SE
cc.16OH_DHEAS_1_m_32w_i_SG_GA_adj	SAB466	hitrtse	-8.58087	1.0497	hormone metabolite	16OH-DHEAS_1	DHEA: 16OH-DHEAS_1	DHEA	Androgen		Hit reaction time SE
cc.16OH_DHEAS_1_m_32w_i_SG_GA_adj	SAB467	hitrtse	154.824	-3.1553	hormone metabolite	16OH-DHEAS_1	DHEA: 16OH-DHEAS_1	DHEA	Androgen		Hit reaction time SE
cc.16OH_DHEAS_1_m_32w_i_SG_GA_adj	SAB467	hitrtse	-114.95	-3.1553	hormone metabolite	16OH-DHEAS_1	DHEA: 16OH-DHEAS_1	DHEA	Androgen		Hit reaction time SE
cc.16OH_DHEAS_1_m_32w_i_SG_GA_adj	SAB467	hitrtse	179.373	-3.1553	hormone metabolite	16OH-DHEAS_1	DHEA: 16OH-DHEAS_1	DHEA	Androgen		Hit reaction time SE
cc.16OH_DHEAS_1_m_32w_i_SG_GA_adj	SAB467	hitrtse	-0.0438826	-3.1553	hormone metabolite	16OH-DHEAS_1	DHEA: 16OH-DHEAS_1	DHEA	Androgen		Hit reaction time SE
cc.16OH_DHEAS_1_m_32w_i_SG_GA_adj	SAB468	hitrtse	-109.737	-4.17139	hormone metabolite	16OH-DHEAS_1	DHEA: 16OH-DHEAS_1	DHEA	Androgen		Hit reaction time SE
cc.16OH_DHEAS_1_m_32w_i_SG_GA_adj	SAB468	hitrtse	156.651	-4.17139	hormone metabolite	16OH-DHEAS_1	DHEA: 16OH-DHEAS_1	DHEA	Androgen		Hit reaction time SE
cc.16OH_DHEAS_1_m_32w_i_SG_GA_adj	SAB468	hitrtse	-150.016	-4.17139	hormone metabolite	16OH-DHEAS_1	DHEA: 16OH-DHEAS_1	DHEA	Androgen		Hit reaction time SE
cc.16OH_DHEAS_1_m_32w_i_SG_GA_adj	SAB468	hitrtse	-15.502	-4.17139	hormone metabolite	16OH-DHEAS_1	DHEA: 16OH-DHEAS_1	DHEA	Androgen		Hit reaction time SE
cc.16OH_DHEAS_1_m_32w_i_SG_GA_adj	SAB469	hitrtse	-41.7516	0.188198	hormone metabolite	16OH-DHEAS_1	DHEA: 16OH-DHEAS_1	DHEA	Androgen		Hit reaction time SE
cc.16OH_DHEAS_1_m_32w_i_SG_GA_adj	SAB469	hitrtse	-35.2374	0.188198	hormone metabolite	16OH-DHEAS_1	DHEA: 16OH-DHEAS_1	DHEA	Androgen		Hit reaction time SE
cc.16OH_DHEAS_1_m_32w_i_SG_GA_adj	SAB469	hitrtse	152.872	0.188198	hormone metabolite	16OH-DHEAS_1	DHEA: 16OH-DHEAS_1	DHEA	Androgen		Hit reaction time SE
cc.16OH_DHEAS_1_m_32w_i_SG_GA_adj	SAB47	hitrtse	-5.37805	-2.55389	hormone metabolite	16OH-DHEAS_1	DHEA: 16OH-DHEAS_1	DHEA	Androgen		Hit reaction time SE
cc.16OH_DHEAS_1_m_32w_i_SG_GA_adj	SAB47	hitrtse	-166.011	-2.55389	hormone metabolite	16OH-DHEAS_1	DHEA: 16OH-DHEAS_1	DHEA	Androgen		Hit reaction time SE
cc.16OH_DHEAS_1_m_32w_i_SG_GA_adj	SAB47	hitrtse	129.758	-2.55389	hormone metabolite	16OH-DHEAS_1	DHEA: 16OH-DHEAS_1	DHEA	Androgen		Hit reaction time SE
cc.16OH_DHEAS_1_m_32w_i_SG_GA_adj	SAB470	hitrtse	-159.706	-1.07768	hormone metabolite	16OH-DHEAS_1	DHEA: 16OH-DHEAS_1	DHEA	Androgen		Hit reaction time SE
cc.16OH_DHEAS_1_m_32w_i_SG_GA_adj	SAB470	hitrtse	25.6491	-1.07768	hormone metabolite	16OH-DHEAS_1	DHEA: 16OH-DHEAS_1	DHEA	Androgen		Hit reaction time SE
cc.16OH_DHEAS_1_m_32w_i_SG_GA_adj	SAB470	hitrtse	207.123	-1.07768	hormone metabolite	16OH-DHEAS_1	DHEA: 16OH-DHEAS_1	DHEA	Androgen		Hit reaction time SE
cc.16OH_DHEAS_1_m_32w_i_SG_GA_adj	SAB470	hitrtse	98.4049	-1.07768	hormone metabolite	16OH-DHEAS_1	DHEA: 16OH-DHEAS_1	DHEA	Androgen		Hit reaction time SE
cc.16OH_DHEAS_1_m_32w_i_SG_GA_adj	SAB471	hitrtse	-153.885	0.757058	hormone metabolite	16OH-DHEAS_1	DHEA: 16OH-DHEAS_1	DHEA	Androgen		Hit reaction time SE
cc.16OH_DHEAS_1_m_32w_i_SG_GA_adj	SAB474	hitrtse	-135.529	0.209763	hormone metabolite	16OH-DHEAS_1	DHEA: 16OH-DHEAS_1	DHEA	Androgen		Hit reaction time SE
cc.16OH_DHEAS_1_m_32w_i_SG_GA_adj	SAB476	hitrtse	106.562	1.63014	hormone metabolite	16OH-DHEAS_1	DHEA: 16OH-DHEAS_1	DHEA	Androgen		Hit reaction time SE
cc.16OH_DHEAS_1_m_32w_i_SG_GA_adj	SAB476	hitrtse	147.106	1.63014	hormone metabolite	16OH-DHEAS_1	DHEA: 16OH-DHEAS_1	DHEA	Androgen		Hit reaction time SE
cc.16OH_DHEAS_1_m_32w_i_SG_GA_adj	SAB476	hitrtse	-162.121	1.63014	hormone metabolite	16OH-DHEAS_1	DHEA: 16OH-DHEAS_1	DHEA	Androgen		Hit reaction time SE
cc.16OH_DHEAS_1_m_32w_i_SG_GA_adj	SAB476	hitrtse	-166.135	1.63014	hormone metabolite	16OH-DHEAS_1	DHEA: 16OH-DHEAS_1	DHEA	Androgen		Hit reaction time SE
cc.16OH_DHEAS_1_m_32w_i_SG_GA_adj	SAB478	hitrtse	119.104	-0.456069	hormone metabolite	16OH-DHEAS_1	DHEA: 16OH-DHEAS_1	DHEA	Androgen		Hit reaction time SE
cc.16OH_DHEAS_1_m_32w_i_SG_GA_adj	SAB478	hitrtse	-124.652	-0.456069	hormone metabolite	16OH-DHEAS_1	DHEA: 16OH-DHEAS_1	DHEA	Androgen		Hit reaction time SE
cc.16OH_DHEAS_1_m_32w_i_SG_GA_adj	SAB478	hitrtse	-21.2389	-0.456069	hormone metabolite	16OH-DHEAS_1	DHEA: 16OH-DHEAS_1	DHEA	Androgen		Hit reaction time SE
cc.16OH_DHEAS_1_m_32w_i_SG_GA_adj	SAB478	hitrtse	142.468	-0.456069	hormone metabolite	16OH-DHEAS_1	DHEA: 16OH-DHEAS_1	DHEA	Androgen		Hit reaction time SE
cc.16OH_DHEAS_1_m_32w_i_SG_GA_adj	SAB479	hitrtse	43.9557	0.864935	hormone metabolite	16OH-DHEAS_1	DHEA: 16OH-DHEAS_1	DHEA	Androgen		Hit reaction time SE
cc.16OH_DHEAS_1_m_32w_i_SG_GA_adj	SAB479	hitrtse	-108.406	0.864935	hormone metabolite	16OH-DHEAS_1	DHEA: 16OH-DHEAS_1	DHEA	Androgen		Hit reaction time SE
cc.16OH_DHEAS_1_m_32w_i_SG_GA_adj	SAB479	hitrtse	-144.485	0.864935	hormone metabolite	16OH-DHEAS_1	DHEA: 16OH-DHEAS_1	DHEA	Androgen		Hit reaction time SE
cc.16OH_DHEAS_1_m_32w_i_SG_GA_adj	SAB479	hitrtse	143.375	0.864935	hormone metabolite	16OH-DHEAS_1	DHEA: 16OH-DHEAS_1	DHEA	Androgen		Hit reaction time SE
cc.16OH_DHEAS_1_m_32w_i_SG_GA_adj	SAB48	hitrtse	98.9811	0.277779	hormone metabolite	16OH-DHEAS_1	DHEA: 16OH-DHEAS_1	DHEA	Androgen		Hit reaction time SE
cc.16OH_DHEAS_1_m_32w_i_SG_GA_adj	SAB48	hitrtse	13.2582	0.277779	hormone metabolite	16OH-DHEAS_1	DHEA: 16OH-DHEAS_1	DHEA	Androgen		Hit reaction time SE
cc.16OH_DHEAS_1_m_32w_i_SG_GA_adj	SAB48	hitrtse	-97.7329	0.277779	hormone metabolite	16OH-DHEAS_1	DHEA: 16OH-DHEAS_1	DHEA	Androgen		Hit reaction time SE
cc.16OH_DHEAS_1_m_32w_i_SG_GA_adj	SAB480	hitrtse	-34.1506	-2.63173	hormone metabolite	16OH-DHEAS_1	DHEA: 16OH-DHEAS_1	DHEA	Androgen		Hit reaction time SE
cc.16OH_DHEAS_1_m_32w_i_SG_GA_adj	SAB480	hitrtse	24.8521	-2.63173	hormone metabolite	16OH-DHEAS_1	DHEA: 16OH-DHEAS_1	DHEA	Androgen		Hit reaction time SE
cc.16OH_DHEAS_1_m_32w_i_SG_GA_adj	SAB480	hitrtse	-162.22	-2.63173	hormone metabolite	16OH-DHEAS_1	DHEA: 16OH-DHEAS_1	DHEA	Androgen		Hit reaction time SE
cc.16OH_DHEAS_1_m_32w_i_SG_GA_adj	SAB480	hitrtse	-123.065	-2.63173	hormone metabolite	16OH-DHEAS_1	DHEA: 16OH-DHEAS_1	DHEA	Androgen		Hit reaction time SE
cc.16OH_DHEAS_1_m_32w_i_SG_GA_adj	SAB482	hitrtse	25.6001	2.61499	hormone metabolite	16OH-DHEAS_1	DHEA: 16OH-DHEAS_1	DHEA	Androgen		Hit reaction time SE
cc.16OH_DHEAS_1_m_32w_i_SG_GA_adj	SAB482	hitrtse	2.34142	2.61499	hormone metabolite	16OH-DHEAS_1	DHEA: 16OH-DHEAS_1	DHEA	Androgen		Hit reaction time SE
cc.16OH_DHEAS_1_m_32w_i_SG_GA_adj	SAB482	hitrtse	238.503	2.61499	hormone metabolite	16OH-DHEAS_1	DHEA: 16OH-DHEAS_1	DHEA	Androgen		Hit reaction time SE
cc.16OH_DHEAS_1_m_32w_i_SG_GA_adj	SAB484	hitrtse	23.093	-0.528397	hormone metabolite	16OH-DHEAS_1	DHEA: 16OH-DHEAS_1	DHEA	Androgen		Hit reaction time SE
cc.16OH_DHEAS_1_m_32w_i_SG_GA_adj	SAB484	hitrtse	-58.7824	-0.528397	hormone metabolite	16OH-DHEAS_1	DHEA: 16OH-DHEAS_1	DHEA	Androgen		Hit reaction time SE
cc.16OH_DHEAS_1_m_32w_i_SG_GA_adj	SAB484	hitrtse	-154.721	-0.528397	hormone metabolite	16OH-DHEAS_1	DHEA: 16OH-DHEAS_1	DHEA	Androgen		Hit reaction time SE
cc.16OH_DHEAS_1_m_32w_i_SG_GA_adj	SAB484	hitrtse	-64.978	-0.528397	hormone metabolite	16OH-DHEAS_1	DHEA: 16OH-DHEAS_1	DHEA	Androgen		Hit reaction time SE
cc.16OH_DHEAS_1_m_32w_i_SG_GA_adj	SAB486	hitrtse	135.741	0.139802	hormone metabolite	16OH-DHEAS_1	DHEA: 16OH-DHEAS_1	DHEA	Androgen		Hit reaction time SE
cc.16OH_DHEAS_1_m_32w_i_SG_GA_adj	SAB486	hitrtse	18.9837	0.139802	hormone metabolite	16OH-DHEAS_1	DHEA: 16OH-DHEAS_1	DHEA	Androgen		Hit reaction time SE
cc.16OH_DHEAS_1_m_32w_i_SG_GA_adj	SAB486	hitrtse	-164.366	0.139802	hormone metabolite	16OH-DHEAS_1	DHEA: 16OH-DHEAS_1	DHEA	Androgen		Hit reaction time SE
cc.16OH_DHEAS_1_m_32w_i_SG_GA_adj	SAB487	hitrtse	55.1913	2.26806	hormone metabolite	16OH-DHEAS_1	DHEA: 16OH-DHEAS_1	DHEA	Androgen		Hit reaction time SE
cc.16OH_DHEAS_1_m_32w_i_SG_GA_adj	SAB487	hitrtse	70.1222	2.26806	hormone metabolite	16OH-DHEAS_1	DHEA: 16OH-DHEAS_1	DHEA	Androgen		Hit reaction time SE
cc.16OH_DHEAS_1_m_32w_i_SG_GA_adj	SAB487	hitrtse	-143.206	2.26806	hormone metabolite	16OH-DHEAS_1	DHEA: 16OH-DHEAS_1	DHEA	Androgen		Hit reaction time SE
cc.16OH_DHEAS_1_m_32w_i_SG_GA_adj	SAB487	hitrtse	150.828	2.26806	hormone metabolite	16OH-DHEAS_1	DHEA: 16OH-DHEAS_1	DHEA	Androgen		Hit reaction time SE
cc.16OH_DHEAS_1_m_32w_i_SG_GA_adj	SAB488	hitrtse	-146.936	1.21879	hormone metabolite	16OH-DHEAS_1	DHEA: 16OH-DHEAS_1	DHEA	Androgen		Hit reaction time SE
cc.16OH_DHEAS_1_m_32w_i_SG_GA_adj	SAB488	hitrtse	50.7076	1.21879	hormone metabolite	16OH-DHEAS_1	DHEA: 16OH-DHEAS_1	DHEA	Androgen		Hit reaction time SE
cc.16OH_DHEAS_1_m_32w_i_SG_GA_adj	SAB488	hitrtse	-164.195	1.21879	hormone metabolite	16OH-DHEAS_1	DHEA: 16OH-DHEAS_1	DHEA	Androgen		Hit reaction time SE
cc.16OH_DHEAS_1_m_32w_i_SG_GA_adj	SAB488	hitrtse	213.079	1.21879	hormone metabolite	16OH-DHEAS_1	DHEA: 16OH-DHEAS_1	DHEA	Androgen		Hit reaction time SE
cc.16OH_DHEAS_1_m_32w_i_SG_GA_adj	SAB490	hitrtse	-119.34	-3.50584	hormone metabolite	16OH-DHEAS_1	DHEA: 16OH-DHEAS_1	DHEA	Androgen		Hit reaction time SE
cc.16OH_DHEAS_1_m_32w_i_SG_GA_adj	SAB490	hitrtse	206.876	-3.50584	hormone metabolite	16OH-DHEAS_1	DHEA: 16OH-DHEAS_1	DHEA	Androgen		Hit reaction time SE
cc.16OH_DHEAS_1_m_32w_i_SG_GA_adj	SAB490	hitrtse	246.159	-3.50584	hormone metabolite	16OH-DHEAS_1	DHEA: 16OH-DHEAS_1	DHEA	Androgen		Hit reaction time SE
cc.16OH_DHEAS_1_m_32w_i_SG_GA_adj	SAB490	hitrtse	52.4121	-3.50584	hormone metabolite	16OH-DHEAS_1	DHEA: 16OH-DHEAS_1	DHEA	Androgen		Hit reaction time SE
cc.16OH_DHEAS_1_m_32w_i_SG_GA_adj	SAB491	hitrtse	-134.378	2.97695	hormone metabolite	16OH-DHEAS_1	DHEA: 16OH-DHEAS_1	DHEA	Androgen		Hit reaction time SE
cc.16OH_DHEAS_1_m_32w_i_SG_GA_adj	SAB491	hitrtse	3.11029	2.97695	hormone metabolite	16OH-DHEAS_1	DHEA: 16OH-DHEAS_1	DHEA	Androgen		Hit reaction time SE
cc.16OH_DHEAS_1_m_32w_i_SG_GA_adj	SAB491	hitrtse	11.3649	2.97695	hormone metabolite	16OH-DHEAS_1	DHEA: 16OH-DHEAS_1	DHEA	Androgen		Hit reaction time SE
cc.16OH_DHEAS_1_m_32w_i_SG_GA_adj	SAB491	hitrtse	-31.9482	2.97695	hormone metabolite	16OH-DHEAS_1	DHEA: 16OH-DHEAS_1	DHEA	Androgen		Hit reaction time SE
cc.16OH_DHEAS_1_m_32w_i_SG_GA_adj	SAB492	hitrtse	11.5544	0.395308	hormone metabolite	16OH-DHEAS_1	DHEA: 16OH-DHEAS_1	DHEA	Androgen		Hit reaction time SE
cc.16OH_DHEAS_1_m_32w_i_SG_GA_adj	SAB492	hitrtse	-16.5119	0.395308	hormone metabolite	16OH-DHEAS_1	DHEA: 16OH-DHEAS_1	DHEA	Androgen		Hit reaction time SE
cc.16OH_DHEAS_1_m_32w_i_SG_GA_adj	SAB492	hitrtse	109.479	0.395308	hormone metabolite	16OH-DHEAS_1	DHEA: 16OH-DHEAS_1	DHEA	Androgen		Hit reaction time SE
cc.16OH_DHEAS_1_m_32w_i_SG_GA_adj	SAB493	hitrtse	-134.83	0.826846	hormone metabolite	16OH-DHEAS_1	DHEA: 16OH-DHEAS_1	DHEA	Androgen		Hit reaction time SE
cc.16OH_DHEAS_1_m_32w_i_SG_GA_adj	SAB493	hitrtse	73.4408	0.826846	hormone metabolite	16OH-DHEAS_1	DHEA: 16OH-DHEAS_1	DHEA	Androgen		Hit reaction time SE
cc.16OH_DHEAS_1_m_32w_i_SG_GA_adj	SAB493	hitrtse	139.27	0.826846	hormone metabolite	16OH-DHEAS_1	DHEA: 16OH-DHEAS_1	DHEA	Androgen		Hit reaction time SE
cc.16OH_DHEAS_1_m_32w_i_SG_GA_adj	SAB493	hitrtse	36.6713	0.826846	hormone metabolite	16OH-DHEAS_1	DHEA: 16OH-DHEAS_1	DHEA	Androgen		Hit reaction time SE
cc.16OH_DHEAS_1_m_32w_i_SG_GA_adj	SAB494	hitrtse	84.134	1.18126	hormone metabolite	16OH-DHEAS_1	DHEA: 16OH-DHEAS_1	DHEA	Androgen		Hit reaction time SE
cc.16OH_DHEAS_1_m_32w_i_SG_GA_adj	SAB494	hitrtse	119.151	1.18126	hormone metabolite	16OH-DHEAS_1	DHEA: 16OH-DHEAS_1	DHEA	Androgen		Hit reaction time SE
cc.16OH_DHEAS_1_m_32w_i_SG_GA_adj	SAB494	hitrtse	-148.405	1.18126	hormone metabolite	16OH-DHEAS_1	DHEA: 16OH-DHEAS_1	DHEA	Androgen		Hit reaction time SE
cc.16OH_DHEAS_1_m_32w_i_SG_GA_adj	SAB494	hitrtse	-43.0137	1.18126	hormone metabolite	16OH-DHEAS_1	DHEA: 16OH-DHEAS_1	DHEA	Androgen		Hit reaction time SE
cc.16OH_DHEAS_1_m_32w_i_SG_GA_adj	SAB495	hitrtse	-8.98548	0.484696	hormone metabolite	16OH-DHEAS_1	DHEA: 16OH-DHEAS_1	DHEA	Androgen		Hit reaction time SE
cc.16OH_DHEAS_1_m_32w_i_SG_GA_adj	SAB495	hitrtse	86.5441	0.484696	hormone metabolite	16OH-DHEAS_1	DHEA: 16OH-DHEAS_1	DHEA	Androgen		Hit reaction time SE
cc.16OH_DHEAS_1_m_32w_i_SG_GA_adj	SAB495	hitrtse	97.5914	0.484696	hormone metabolite	16OH-DHEAS_1	DHEA: 16OH-DHEAS_1	DHEA	Androgen		Hit reaction time SE
cc.16OH_DHEAS_1_m_32w_i_SG_GA_adj	SAB496	hitrtse	-153.19	2.9789	hormone metabolite	16OH-DHEAS_1	DHEA: 16OH-DHEAS_1	DHEA	Androgen		Hit reaction time SE
cc.16OH_DHEAS_1_m_32w_i_SG_GA_adj	SAB496	hitrtse	12.4662	2.9789	hormone metabolite	16OH-DHEAS_1	DHEA: 16OH-DHEAS_1	DHEA	Androgen		Hit reaction time SE
cc.16OH_DHEAS_1_m_32w_i_SG_GA_adj	SAB496	hitrtse	-35.4851	2.9789	hormone metabolite	16OH-DHEAS_1	DHEA: 16OH-DHEAS_1	DHEA	Androgen		Hit reaction time SE
cc.16OH_DHEAS_1_m_32w_i_SG_GA_adj	SAB496	hitrtse	-124.426	2.9789	hormone metabolite	16OH-DHEAS_1	DHEA: 16OH-DHEAS_1	DHEA	Androgen		Hit reaction time SE
cc.16OH_DHEAS_1_m_32w_i_SG_GA_adj	SAB498	hitrtse	100.999	1.86729	hormone metabolite	16OH-DHEAS_1	DHEA: 16OH-DHEAS_1	DHEA	Androgen		Hit reaction time SE
cc.16OH_DHEAS_1_m_32w_i_SG_GA_adj	SAB498	hitrtse	-150.348	1.86729	hormone metabolite	16OH-DHEAS_1	DHEA: 16OH-DHEAS_1	DHEA	Androgen		Hit reaction time SE
cc.16OH_DHEAS_1_m_32w_i_SG_GA_adj	SAB499	hitrtse	114.98	0.971069	hormone metabolite	16OH-DHEAS_1	DHEA: 16OH-DHEAS_1	DHEA	Androgen		Hit reaction time SE
cc.16OH_DHEAS_1_m_32w_i_SG_GA_adj	SAB499	hitrtse	111.472	0.971069	hormone metabolite	16OH-DHEAS_1	DHEA: 16OH-DHEAS_1	DHEA	Androgen		Hit reaction time SE
cc.16OH_DHEAS_1_m_32w_i_SG_GA_adj	SAB499	hitrtse	-88.2547	0.971069	hormone metabolite	16OH-DHEAS_1	DHEA: 16OH-DHEAS_1	DHEA	Androgen		Hit reaction time SE
cc.16OH_DHEAS_1_m_32w_i_SG_GA_adj	SAB499	hitrtse	-138.31	0.971069	hormone metabolite	16OH-DHEAS_1	DHEA: 16OH-DHEAS_1	DHEA	Androgen		Hit reaction time SE
cc.16OH_DHEAS_1_m_32w_i_SG_GA_adj	SAB50	hitrtse	29.4251	1.11582	hormone metabolite	16OH-DHEAS_1	DHEA: 16OH-DHEAS_1	DHEA	Androgen		Hit reaction time SE
cc.16OH_DHEAS_1_m_32w_i_SG_GA_adj	SAB50	hitrtse	69.7204	1.11582	hormone metabolite	16OH-DHEAS_1	DHEA: 16OH-DHEAS_1	DHEA	Androgen		Hit reaction time SE
cc.16OH_DHEAS_1_m_32w_i_SG_GA_adj	SAB50	hitrtse	-131.438	1.11582	hormone metabolite	16OH-DHEAS_1	DHEA: 16OH-DHEAS_1	DHEA	Androgen		Hit reaction time SE
cc.16OH_DHEAS_1_m_32w_i_SG_GA_adj	SAB500	hitrtse	68.918	-0.174977	hormone metabolite	16OH-DHEAS_1	DHEA: 16OH-DHEAS_1	DHEA	Androgen		Hit reaction time SE
cc.16OH_DHEAS_1_m_32w_i_SG_GA_adj	SAB500	hitrtse	-92.4829	-0.174977	hormone metabolite	16OH-DHEAS_1	DHEA: 16OH-DHEAS_1	DHEA	Androgen		Hit reaction time SE
cc.16OH_DHEAS_1_m_32w_i_SG_GA_adj	SAB500	hitrtse	30.0217	-0.174977	hormone metabolite	16OH-DHEAS_1	DHEA: 16OH-DHEAS_1	DHEA	Androgen		Hit reaction time SE
cc.16OH_DHEAS_1_m_32w_i_SG_GA_adj	SAB500	hitrtse	-134.619	-0.174977	hormone metabolite	16OH-DHEAS_1	DHEA: 16OH-DHEAS_1	DHEA	Androgen		Hit reaction time SE
cc.16OH_DHEAS_1_m_32w_i_SG_GA_adj	SAB502	hitrtse	-20.6926	-0.0550594	hormone metabolite	16OH-DHEAS_1	DHEA: 16OH-DHEAS_1	DHEA	Androgen		Hit reaction time SE
cc.16OH_DHEAS_1_m_32w_i_SG_GA_adj	SAB502	hitrtse	169.439	-0.0550594	hormone metabolite	16OH-DHEAS_1	DHEA: 16OH-DHEAS_1	DHEA	Androgen		Hit reaction time SE
cc.16OH_DHEAS_1_m_32w_i_SG_GA_adj	SAB502	hitrtse	-142.594	-0.0550594	hormone metabolite	16OH-DHEAS_1	DHEA: 16OH-DHEAS_1	DHEA	Androgen		Hit reaction time SE
cc.16OH_DHEAS_1_m_32w_i_SG_GA_adj	SAB502	hitrtse	-122.2	-0.0550594	hormone metabolite	16OH-DHEAS_1	DHEA: 16OH-DHEAS_1	DHEA	Androgen		Hit reaction time SE
cc.16OH_DHEAS_1_m_32w_i_SG_GA_adj	SAB503	hitrtse	-20.578	-0.920077	hormone metabolite	16OH-DHEAS_1	DHEA: 16OH-DHEAS_1	DHEA	Androgen		Hit reaction time SE
cc.16OH_DHEAS_1_m_32w_i_SG_GA_adj	SAB503	hitrtse	-129.87	-0.920077	hormone metabolite	16OH-DHEAS_1	DHEA: 16OH-DHEAS_1	DHEA	Androgen		Hit reaction time SE
cc.16OH_DHEAS_1_m_32w_i_SG_GA_adj	SAB503	hitrtse	44.4606	-0.920077	hormone metabolite	16OH-DHEAS_1	DHEA: 16OH-DHEAS_1	DHEA	Androgen		Hit reaction time SE
cc.16OH_DHEAS_1_m_32w_i_SG_GA_adj	SAB503	hitrtse	57.3759	-0.920077	hormone metabolite	16OH-DHEAS_1	DHEA: 16OH-DHEAS_1	DHEA	Androgen		Hit reaction time SE
cc.16OH_DHEAS_1_m_32w_i_SG_GA_adj	SAB505	hitrtse	-127.051	-0.855123	hormone metabolite	16OH-DHEAS_1	DHEA: 16OH-DHEAS_1	DHEA	Androgen		Hit reaction time SE
cc.16OH_DHEAS_1_m_32w_i_SG_GA_adj	SAB505	hitrtse	-36.6362	-0.855123	hormone metabolite	16OH-DHEAS_1	DHEA: 16OH-DHEAS_1	DHEA	Androgen		Hit reaction time SE
cc.16OH_DHEAS_1_m_32w_i_SG_GA_adj	SAB505	hitrtse	-109.621	-0.855123	hormone metabolite	16OH-DHEAS_1	DHEA: 16OH-DHEAS_1	DHEA	Androgen		Hit reaction time SE
cc.16OH_DHEAS_1_m_32w_i_SG_GA_adj	SAB505	hitrtse	35.3322	-0.855123	hormone metabolite	16OH-DHEAS_1	DHEA: 16OH-DHEAS_1	DHEA	Androgen		Hit reaction time SE
cc.16OH_DHEAS_1_m_32w_i_SG_GA_adj	SAB507	hitrtse	143.021	-0.41499	hormone metabolite	16OH-DHEAS_1	DHEA: 16OH-DHEAS_1	DHEA	Androgen		Hit reaction time SE
cc.16OH_DHEAS_1_m_32w_i_SG_GA_adj	SAB507	hitrtse	-101.153	-0.41499	hormone metabolite	16OH-DHEAS_1	DHEA: 16OH-DHEAS_1	DHEA	Androgen		Hit reaction time SE
cc.16OH_DHEAS_1_m_32w_i_SG_GA_adj	SAB507	hitrtse	-160.942	-0.41499	hormone metabolite	16OH-DHEAS_1	DHEA: 16OH-DHEAS_1	DHEA	Androgen		Hit reaction time SE
cc.16OH_DHEAS_1_m_32w_i_SG_GA_adj	SAB507	hitrtse	-52.2589	-0.41499	hormone metabolite	16OH-DHEAS_1	DHEA: 16OH-DHEAS_1	DHEA	Androgen		Hit reaction time SE
cc.16OH_DHEAS_1_m_32w_i_SG_GA_adj	SAB508	hitrtse	43.2539	1.45723	hormone metabolite	16OH-DHEAS_1	DHEA: 16OH-DHEAS_1	DHEA	Androgen		Hit reaction time SE
cc.16OH_DHEAS_1_m_32w_i_SG_GA_adj	SAB508	hitrtse	-126.589	1.45723	hormone metabolite	16OH-DHEAS_1	DHEA: 16OH-DHEAS_1	DHEA	Androgen		Hit reaction time SE
cc.16OH_DHEAS_1_m_32w_i_SG_GA_adj	SAB508	hitrtse	-169.931	1.45723	hormone metabolite	16OH-DHEAS_1	DHEA: 16OH-DHEAS_1	DHEA	Androgen		Hit reaction time SE
cc.16OH_DHEAS_1_m_32w_i_SG_GA_adj	SAB508	hitrtse	129.644	1.45723	hormone metabolite	16OH-DHEAS_1	DHEA: 16OH-DHEAS_1	DHEA	Androgen		Hit reaction time SE
cc.16OH_DHEAS_1_m_32w_i_SG_GA_adj	SAB509	hitrtse	-153.932	0.457177	hormone metabolite	16OH-DHEAS_1	DHEA: 16OH-DHEAS_1	DHEA	Androgen		Hit reaction time SE
cc.16OH_DHEAS_1_m_32w_i_SG_GA_adj	SAB509	hitrtse	149.187	0.457177	hormone metabolite	16OH-DHEAS_1	DHEA: 16OH-DHEAS_1	DHEA	Androgen		Hit reaction time SE
cc.16OH_DHEAS_1_m_32w_i_SG_GA_adj	SAB509	hitrtse	71.1948	0.457177	hormone metabolite	16OH-DHEAS_1	DHEA: 16OH-DHEAS_1	DHEA	Androgen		Hit reaction time SE
cc.16OH_DHEAS_1_m_32w_i_SG_GA_adj	SAB509	hitrtse	39.2895	0.457177	hormone metabolite	16OH-DHEAS_1	DHEA: 16OH-DHEAS_1	DHEA	Androgen		Hit reaction time SE
cc.16OH_DHEAS_1_m_32w_i_SG_GA_adj	SAB512	hitrtse	20.7735	-0.184495	hormone metabolite	16OH-DHEAS_1	DHEA: 16OH-DHEAS_1	DHEA	Androgen		Hit reaction time SE
cc.16OH_DHEAS_1_m_32w_i_SG_GA_adj	SAB512	hitrtse	191.078	-0.184495	hormone metabolite	16OH-DHEAS_1	DHEA: 16OH-DHEAS_1	DHEA	Androgen		Hit reaction time SE
cc.16OH_DHEAS_1_m_32w_i_SG_GA_adj	SAB512	hitrtse	-158.135	-0.184495	hormone metabolite	16OH-DHEAS_1	DHEA: 16OH-DHEAS_1	DHEA	Androgen		Hit reaction time SE
cc.16OH_DHEAS_1_m_32w_i_SG_GA_adj	SAB512	hitrtse	-107.164	-0.184495	hormone metabolite	16OH-DHEAS_1	DHEA: 16OH-DHEAS_1	DHEA	Androgen		Hit reaction time SE
cc.16OH_DHEAS_1_m_32w_i_SG_GA_adj	SAB513	hitrtse	-35.1389	0.620618	hormone metabolite	16OH-DHEAS_1	DHEA: 16OH-DHEAS_1	DHEA	Androgen		Hit reaction time SE
cc.16OH_DHEAS_1_m_32w_i_SG_GA_adj	SAB513	hitrtse	124.51	0.620618	hormone metabolite	16OH-DHEAS_1	DHEA: 16OH-DHEAS_1	DHEA	Androgen		Hit reaction time SE
cc.16OH_DHEAS_1_m_32w_i_SG_GA_adj	SAB513	hitrtse	151.037	0.620618	hormone metabolite	16OH-DHEAS_1	DHEA: 16OH-DHEAS_1	DHEA	Androgen		Hit reaction time SE
cc.16OH_DHEAS_1_m_32w_i_SG_GA_adj	SAB513	hitrtse	-134.863	0.620618	hormone metabolite	16OH-DHEAS_1	DHEA: 16OH-DHEAS_1	DHEA	Androgen		Hit reaction time SE
cc.16OH_DHEAS_1_m_32w_i_SG_GA_adj	SAB515	hitrtse	94.3707	0.636155	hormone metabolite	16OH-DHEAS_1	DHEA: 16OH-DHEAS_1	DHEA	Androgen		Hit reaction time SE
cc.16OH_DHEAS_1_m_32w_i_SG_GA_adj	SAB515	hitrtse	119.844	0.636155	hormone metabolite	16OH-DHEAS_1	DHEA: 16OH-DHEAS_1	DHEA	Androgen		Hit reaction time SE
cc.16OH_DHEAS_1_m_32w_i_SG_GA_adj	SAB515	hitrtse	54.2562	0.636155	hormone metabolite	16OH-DHEAS_1	DHEA: 16OH-DHEAS_1	DHEA	Androgen		Hit reaction time SE
cc.16OH_DHEAS_1_m_32w_i_SG_GA_adj	SAB516	hitrtse	75.3546	0.14648	hormone metabolite	16OH-DHEAS_1	DHEA: 16OH-DHEAS_1	DHEA	Androgen		Hit reaction time SE
cc.16OH_DHEAS_1_m_32w_i_SG_GA_adj	SAB516	hitrtse	-141.275	0.14648	hormone metabolite	16OH-DHEAS_1	DHEA: 16OH-DHEAS_1	DHEA	Androgen		Hit reaction time SE
cc.16OH_DHEAS_1_m_32w_i_SG_GA_adj	SAB516	hitrtse	80.7978	0.14648	hormone metabolite	16OH-DHEAS_1	DHEA: 16OH-DHEAS_1	DHEA	Androgen		Hit reaction time SE
cc.16OH_DHEAS_1_m_32w_i_SG_GA_adj	SAB517	hitrtse	99.2834	0.411592	hormone metabolite	16OH-DHEAS_1	DHEA: 16OH-DHEAS_1	DHEA	Androgen		Hit reaction time SE
cc.16OH_DHEAS_1_m_32w_i_SG_GA_adj	SAB517	hitrtse	229.312	0.411592	hormone metabolite	16OH-DHEAS_1	DHEA: 16OH-DHEAS_1	DHEA	Androgen		Hit reaction time SE
cc.16OH_DHEAS_1_m_32w_i_SG_GA_adj	SAB517	hitrtse	60.7757	0.411592	hormone metabolite	16OH-DHEAS_1	DHEA: 16OH-DHEAS_1	DHEA	Androgen		Hit reaction time SE
cc.16OH_DHEAS_1_m_32w_i_SG_GA_adj	SAB517	hitrtse	-138.441	0.411592	hormone metabolite	16OH-DHEAS_1	DHEA: 16OH-DHEAS_1	DHEA	Androgen		Hit reaction time SE
cc.16OH_DHEAS_1_m_32w_i_SG_GA_adj	SAB518	hitrtse	-81.8835	1.13199	hormone metabolite	16OH-DHEAS_1	DHEA: 16OH-DHEAS_1	DHEA	Androgen		Hit reaction time SE
cc.16OH_DHEAS_1_m_32w_i_SG_GA_adj	SAB518	hitrtse	-23.4687	1.13199	hormone metabolite	16OH-DHEAS_1	DHEA: 16OH-DHEAS_1	DHEA	Androgen		Hit reaction time SE
cc.16OH_DHEAS_1_m_32w_i_SG_GA_adj	SAB518	hitrtse	151.665	1.13199	hormone metabolite	16OH-DHEAS_1	DHEA: 16OH-DHEAS_1	DHEA	Androgen		Hit reaction time SE
cc.16OH_DHEAS_1_m_32w_i_SG_GA_adj	SAB519	hitrtse	162.415	0.252709	hormone metabolite	16OH-DHEAS_1	DHEA: 16OH-DHEAS_1	DHEA	Androgen		Hit reaction time SE
cc.16OH_DHEAS_1_m_32w_i_SG_GA_adj	SAB519	hitrtse	-134.024	0.252709	hormone metabolite	16OH-DHEAS_1	DHEA: 16OH-DHEAS_1	DHEA	Androgen		Hit reaction time SE
cc.16OH_DHEAS_1_m_32w_i_SG_GA_adj	SAB519	hitrtse	-3.46965	0.252709	hormone metabolite	16OH-DHEAS_1	DHEA: 16OH-DHEAS_1	DHEA	Androgen		Hit reaction time SE
cc.16OH_DHEAS_1_m_32w_i_SG_GA_adj	SAB519	hitrtse	105.451	0.252709	hormone metabolite	16OH-DHEAS_1	DHEA: 16OH-DHEAS_1	DHEA	Androgen		Hit reaction time SE
cc.16OH_DHEAS_1_m_32w_i_SG_GA_adj	SAB52	hitrtse	126.696	1.50427	hormone metabolite	16OH-DHEAS_1	DHEA: 16OH-DHEAS_1	DHEA	Androgen		Hit reaction time SE
cc.16OH_DHEAS_1_m_32w_i_SG_GA_adj	SAB52	hitrtse	54.8077	1.50427	hormone metabolite	16OH-DHEAS_1	DHEA: 16OH-DHEAS_1	DHEA	Androgen		Hit reaction time SE
cc.16OH_DHEAS_1_m_32w_i_SG_GA_adj	SAB520	hitrtse	104.221	-0.396199	hormone metabolite	16OH-DHEAS_1	DHEA: 16OH-DHEAS_1	DHEA	Androgen		Hit reaction time SE
cc.16OH_DHEAS_1_m_32w_i_SG_GA_adj	SAB520	hitrtse	-54.5268	-0.396199	hormone metabolite	16OH-DHEAS_1	DHEA: 16OH-DHEAS_1	DHEA	Androgen		Hit reaction time SE
cc.16OH_DHEAS_1_m_32w_i_SG_GA_adj	SAB520	hitrtse	-174.756	-0.396199	hormone metabolite	16OH-DHEAS_1	DHEA: 16OH-DHEAS_1	DHEA	Androgen		Hit reaction time SE
cc.16OH_DHEAS_1_m_32w_i_SG_GA_adj	SAB520	hitrtse	-110.308	-0.396199	hormone metabolite	16OH-DHEAS_1	DHEA: 16OH-DHEAS_1	DHEA	Androgen		Hit reaction time SE
cc.16OH_DHEAS_1_m_32w_i_SG_GA_adj	SAB524	hitrtse	188.311	-0.353017	hormone metabolite	16OH-DHEAS_1	DHEA: 16OH-DHEAS_1	DHEA	Androgen		Hit reaction time SE
cc.16OH_DHEAS_1_m_32w_i_SG_GA_adj	SAB524	hitrtse	28.0672	-0.353017	hormone metabolite	16OH-DHEAS_1	DHEA: 16OH-DHEAS_1	DHEA	Androgen		Hit reaction time SE
cc.16OH_DHEAS_1_m_32w_i_SG_GA_adj	SAB524	hitrtse	-124.265	-0.353017	hormone metabolite	16OH-DHEAS_1	DHEA: 16OH-DHEAS_1	DHEA	Androgen		Hit reaction time SE
cc.16OH_DHEAS_1_m_32w_i_SG_GA_adj	SAB524	hitrtse	-15.5927	-0.353017	hormone metabolite	16OH-DHEAS_1	DHEA: 16OH-DHEAS_1	DHEA	Androgen		Hit reaction time SE
cc.16OH_DHEAS_1_m_32w_i_SG_GA_adj	SAB525	hitrtse	165.92	1.01222	hormone metabolite	16OH-DHEAS_1	DHEA: 16OH-DHEAS_1	DHEA	Androgen		Hit reaction time SE
cc.16OH_DHEAS_1_m_32w_i_SG_GA_adj	SAB525	hitrtse	188.644	1.01222	hormone metabolite	16OH-DHEAS_1	DHEA: 16OH-DHEAS_1	DHEA	Androgen		Hit reaction time SE
cc.16OH_DHEAS_1_m_32w_i_SG_GA_adj	SAB525	hitrtse	-156.967	1.01222	hormone metabolite	16OH-DHEAS_1	DHEA: 16OH-DHEAS_1	DHEA	Androgen		Hit reaction time SE
cc.16OH_DHEAS_1_m_32w_i_SG_GA_adj	SAB525	hitrtse	167.756	1.01222	hormone metabolite	16OH-DHEAS_1	DHEA: 16OH-DHEAS_1	DHEA	Androgen		Hit reaction time SE
cc.16OH_DHEAS_1_m_32w_i_SG_GA_adj	SAB526	hitrtse	-126.367	-2.33898	hormone metabolite	16OH-DHEAS_1	DHEA: 16OH-DHEAS_1	DHEA	Androgen		Hit reaction time SE
cc.16OH_DHEAS_1_m_32w_i_SG_GA_adj	SAB526	hitrtse	-66.6079	-2.33898	hormone metabolite	16OH-DHEAS_1	DHEA: 16OH-DHEAS_1	DHEA	Androgen		Hit reaction time SE
cc.16OH_DHEAS_1_m_32w_i_SG_GA_adj	SAB526	hitrtse	3.15298	-2.33898	hormone metabolite	16OH-DHEAS_1	DHEA: 16OH-DHEAS_1	DHEA	Androgen		Hit reaction time SE
cc.16OH_DHEAS_1_m_32w_i_SG_GA_adj	SAB526	hitrtse	-121.578	-2.33898	hormone metabolite	16OH-DHEAS_1	DHEA: 16OH-DHEAS_1	DHEA	Androgen		Hit reaction time SE
cc.16OH_DHEAS_1_m_32w_i_SG_GA_adj	SAB527	hitrtse	-72.2506	-0.229332	hormone metabolite	16OH-DHEAS_1	DHEA: 16OH-DHEAS_1	DHEA	Androgen		Hit reaction time SE
cc.16OH_DHEAS_1_m_32w_i_SG_GA_adj	SAB527	hitrtse	-1.31117	-0.229332	hormone metabolite	16OH-DHEAS_1	DHEA: 16OH-DHEAS_1	DHEA	Androgen		Hit reaction time SE
cc.16OH_DHEAS_1_m_32w_i_SG_GA_adj	SAB527	hitrtse	-153.562	-0.229332	hormone metabolite	16OH-DHEAS_1	DHEA: 16OH-DHEAS_1	DHEA	Androgen		Hit reaction time SE
cc.16OH_DHEAS_1_m_32w_i_SG_GA_adj	SAB527	hitrtse	38.9125	-0.229332	hormone metabolite	16OH-DHEAS_1	DHEA: 16OH-DHEAS_1	DHEA	Androgen		Hit reaction time SE
cc.16OH_DHEAS_1_m_32w_i_SG_GA_adj	SAB528	hitrtse	-138.34	0.234268	hormone metabolite	16OH-DHEAS_1	DHEA: 16OH-DHEAS_1	DHEA	Androgen		Hit reaction time SE
cc.16OH_DHEAS_1_m_32w_i_SG_GA_adj	SAB528	hitrtse	115.417	0.234268	hormone metabolite	16OH-DHEAS_1	DHEA: 16OH-DHEAS_1	DHEA	Androgen		Hit reaction time SE
cc.16OH_DHEAS_1_m_32w_i_SG_GA_adj	SAB528	hitrtse	168.433	0.234268	hormone metabolite	16OH-DHEAS_1	DHEA: 16OH-DHEAS_1	DHEA	Androgen		Hit reaction time SE
cc.16OH_DHEAS_1_m_32w_i_SG_GA_adj	SAB528	hitrtse	282.969	0.234268	hormone metabolite	16OH-DHEAS_1	DHEA: 16OH-DHEAS_1	DHEA	Androgen		Hit reaction time SE
cc.16OH_DHEAS_1_m_32w_i_SG_GA_adj	SAB529	hitrtse	179.605	0.765905	hormone metabolite	16OH-DHEAS_1	DHEA: 16OH-DHEAS_1	DHEA	Androgen		Hit reaction time SE
cc.16OH_DHEAS_1_m_32w_i_SG_GA_adj	SAB529	hitrtse	-108.814	0.765905	hormone metabolite	16OH-DHEAS_1	DHEA: 16OH-DHEAS_1	DHEA	Androgen		Hit reaction time SE
cc.16OH_DHEAS_1_m_32w_i_SG_GA_adj	SAB53	hitrtse	34.045	-2.19497	hormone metabolite	16OH-DHEAS_1	DHEA: 16OH-DHEAS_1	DHEA	Androgen		Hit reaction time SE
cc.16OH_DHEAS_1_m_32w_i_SG_GA_adj	SAB53	hitrtse	-18.7826	-2.19497	hormone metabolite	16OH-DHEAS_1	DHEA: 16OH-DHEAS_1	DHEA	Androgen		Hit reaction time SE
cc.16OH_DHEAS_1_m_32w_i_SG_GA_adj	SAB53	hitrtse	23.857	-2.19497	hormone metabolite	16OH-DHEAS_1	DHEA: 16OH-DHEAS_1	DHEA	Androgen		Hit reaction time SE
cc.16OH_DHEAS_1_m_32w_i_SG_GA_adj	SAB530	hitrtse	-9.51627	0.874916	hormone metabolite	16OH-DHEAS_1	DHEA: 16OH-DHEAS_1	DHEA	Androgen		Hit reaction time SE
cc.16OH_DHEAS_1_m_32w_i_SG_GA_adj	SAB530	hitrtse	-141.388	0.874916	hormone metabolite	16OH-DHEAS_1	DHEA: 16OH-DHEAS_1	DHEA	Androgen		Hit reaction time SE
cc.16OH_DHEAS_1_m_32w_i_SG_GA_adj	SAB530	hitrtse	118.62	0.874916	hormone metabolite	16OH-DHEAS_1	DHEA: 16OH-DHEAS_1	DHEA	Androgen		Hit reaction time SE
cc.16OH_DHEAS_1_m_32w_i_SG_GA_adj	SAB530	hitrtse	-50.4219	0.874916	hormone metabolite	16OH-DHEAS_1	DHEA: 16OH-DHEAS_1	DHEA	Androgen		Hit reaction time SE
cc.16OH_DHEAS_1_m_32w_i_SG_GA_adj	SAB531	hitrtse	250.078	-0.31458	hormone metabolite	16OH-DHEAS_1	DHEA: 16OH-DHEAS_1	DHEA	Androgen		Hit reaction time SE
cc.16OH_DHEAS_1_m_32w_i_SG_GA_adj	SAB531	hitrtse	-105.571	-0.31458	hormone metabolite	16OH-DHEAS_1	DHEA: 16OH-DHEAS_1	DHEA	Androgen		Hit reaction time SE
cc.16OH_DHEAS_1_m_32w_i_SG_GA_adj	SAB531	hitrtse	55.0101	-0.31458	hormone metabolite	16OH-DHEAS_1	DHEA: 16OH-DHEAS_1	DHEA	Androgen		Hit reaction time SE
cc.16OH_DHEAS_1_m_32w_i_SG_GA_adj	SAB531	hitrtse	209.283	-0.31458	hormone metabolite	16OH-DHEAS_1	DHEA: 16OH-DHEAS_1	DHEA	Androgen		Hit reaction time SE
cc.16OH_DHEAS_1_m_32w_i_SG_GA_adj	SAB532	hitrtse	164.539	-0.212202	hormone metabolite	16OH-DHEAS_1	DHEA: 16OH-DHEAS_1	DHEA	Androgen		Hit reaction time SE
cc.16OH_DHEAS_1_m_32w_i_SG_GA_adj	SAB532	hitrtse	82.2256	-0.212202	hormone metabolite	16OH-DHEAS_1	DHEA: 16OH-DHEAS_1	DHEA	Androgen		Hit reaction time SE
cc.16OH_DHEAS_1_m_32w_i_SG_GA_adj	SAB532	hitrtse	122.406	-0.212202	hormone metabolite	16OH-DHEAS_1	DHEA: 16OH-DHEAS_1	DHEA	Androgen		Hit reaction time SE
cc.16OH_DHEAS_1_m_32w_i_SG_GA_adj	SAB532	hitrtse	-151.716	-0.212202	hormone metabolite	16OH-DHEAS_1	DHEA: 16OH-DHEAS_1	DHEA	Androgen		Hit reaction time SE
cc.16OH_DHEAS_1_m_32w_i_SG_GA_adj	SAB534	hitrtse	14.527	-1.08594	hormone metabolite	16OH-DHEAS_1	DHEA: 16OH-DHEAS_1	DHEA	Androgen		Hit reaction time SE
cc.16OH_DHEAS_1_m_32w_i_SG_GA_adj	SAB534	hitrtse	-123.441	-1.08594	hormone metabolite	16OH-DHEAS_1	DHEA: 16OH-DHEAS_1	DHEA	Androgen		Hit reaction time SE
cc.16OH_DHEAS_1_m_32w_i_SG_GA_adj	SAB534	hitrtse	186.09	-1.08594	hormone metabolite	16OH-DHEAS_1	DHEA: 16OH-DHEAS_1	DHEA	Androgen		Hit reaction time SE
cc.16OH_DHEAS_1_m_32w_i_SG_GA_adj	SAB534	hitrtse	-125.915	-1.08594	hormone metabolite	16OH-DHEAS_1	DHEA: 16OH-DHEAS_1	DHEA	Androgen		Hit reaction time SE
cc.16OH_DHEAS_1_m_32w_i_SG_GA_adj	SAB535	hitrtse	159.324	-0.656649	hormone metabolite	16OH-DHEAS_1	DHEA: 16OH-DHEAS_1	DHEA	Androgen		Hit reaction time SE
cc.16OH_DHEAS_1_m_32w_i_SG_GA_adj	SAB535	hitrtse	3.57733	-0.656649	hormone metabolite	16OH-DHEAS_1	DHEA: 16OH-DHEAS_1	DHEA	Androgen		Hit reaction time SE
cc.16OH_DHEAS_1_m_32w_i_SG_GA_adj	SAB535	hitrtse	31.3486	-0.656649	hormone metabolite	16OH-DHEAS_1	DHEA: 16OH-DHEAS_1	DHEA	Androgen		Hit reaction time SE
cc.16OH_DHEAS_1_m_32w_i_SG_GA_adj	SAB535	hitrtse	-101.733	-0.656649	hormone metabolite	16OH-DHEAS_1	DHEA: 16OH-DHEAS_1	DHEA	Androgen		Hit reaction time SE
cc.16OH_DHEAS_1_m_32w_i_SG_GA_adj	SAB536	hitrtse	92.9646	0.975387	hormone metabolite	16OH-DHEAS_1	DHEA: 16OH-DHEAS_1	DHEA	Androgen		Hit reaction time SE
cc.16OH_DHEAS_1_m_32w_i_SG_GA_adj	SAB536	hitrtse	-141.622	0.975387	hormone metabolite	16OH-DHEAS_1	DHEA: 16OH-DHEAS_1	DHEA	Androgen		Hit reaction time SE
cc.16OH_DHEAS_1_m_32w_i_SG_GA_adj	SAB536	hitrtse	128.314	0.975387	hormone metabolite	16OH-DHEAS_1	DHEA: 16OH-DHEAS_1	DHEA	Androgen		Hit reaction time SE
cc.16OH_DHEAS_1_m_32w_i_SG_GA_adj	SAB536	hitrtse	-125.702	0.975387	hormone metabolite	16OH-DHEAS_1	DHEA: 16OH-DHEAS_1	DHEA	Androgen		Hit reaction time SE
cc.16OH_DHEAS_1_m_32w_i_SG_GA_adj	SAB537	hitrtse	42.0488	0.716888	hormone metabolite	16OH-DHEAS_1	DHEA: 16OH-DHEAS_1	DHEA	Androgen		Hit reaction time SE
cc.16OH_DHEAS_1_m_32w_i_SG_GA_adj	SAB537	hitrtse	88.4635	0.716888	hormone metabolite	16OH-DHEAS_1	DHEA: 16OH-DHEAS_1	DHEA	Androgen		Hit reaction time SE
cc.16OH_DHEAS_1_m_32w_i_SG_GA_adj	SAB537	hitrtse	-156.614	0.716888	hormone metabolite	16OH-DHEAS_1	DHEA: 16OH-DHEAS_1	DHEA	Androgen		Hit reaction time SE
cc.16OH_DHEAS_1_m_32w_i_SG_GA_adj	SAB538	hitrtse	-123.093	-0.769636	hormone metabolite	16OH-DHEAS_1	DHEA: 16OH-DHEAS_1	DHEA	Androgen		Hit reaction time SE
cc.16OH_DHEAS_1_m_32w_i_SG_GA_adj	SAB538	hitrtse	83.5885	-0.769636	hormone metabolite	16OH-DHEAS_1	DHEA: 16OH-DHEAS_1	DHEA	Androgen		Hit reaction time SE
cc.16OH_DHEAS_1_m_32w_i_SG_GA_adj	SAB538	hitrtse	-77.6248	-0.769636	hormone metabolite	16OH-DHEAS_1	DHEA: 16OH-DHEAS_1	DHEA	Androgen		Hit reaction time SE
cc.16OH_DHEAS_1_m_32w_i_SG_GA_adj	SAB539	hitrtse	42.072	-0.959711	hormone metabolite	16OH-DHEAS_1	DHEA: 16OH-DHEAS_1	DHEA	Androgen		Hit reaction time SE
cc.16OH_DHEAS_1_m_32w_i_SG_GA_adj	SAB539	hitrtse	-9.01362	-0.959711	hormone metabolite	16OH-DHEAS_1	DHEA: 16OH-DHEAS_1	DHEA	Androgen		Hit reaction time SE
cc.16OH_DHEAS_1_m_32w_i_SG_GA_adj	SAB539	hitrtse	-95.1967	-0.959711	hormone metabolite	16OH-DHEAS_1	DHEA: 16OH-DHEAS_1	DHEA	Androgen		Hit reaction time SE
cc.16OH_DHEAS_1_m_32w_i_SG_GA_adj	SAB539	hitrtse	-138.182	-0.959711	hormone metabolite	16OH-DHEAS_1	DHEA: 16OH-DHEAS_1	DHEA	Androgen		Hit reaction time SE
cc.16OH_DHEAS_1_m_32w_i_SG_GA_adj	SAB54	hitrtse	-41.3093	0.773406	hormone metabolite	16OH-DHEAS_1	DHEA: 16OH-DHEAS_1	DHEA	Androgen		Hit reaction time SE
cc.16OH_DHEAS_1_m_32w_i_SG_GA_adj	SAB540	hitrtse	72.9201	-0.791838	hormone metabolite	16OH-DHEAS_1	DHEA: 16OH-DHEAS_1	DHEA	Androgen		Hit reaction time SE
cc.16OH_DHEAS_1_m_32w_i_SG_GA_adj	SAB540	hitrtse	-152.099	-0.791838	hormone metabolite	16OH-DHEAS_1	DHEA: 16OH-DHEAS_1	DHEA	Androgen		Hit reaction time SE
cc.16OH_DHEAS_1_m_32w_i_SG_GA_adj	SAB540	hitrtse	-39.7284	-0.791838	hormone metabolite	16OH-DHEAS_1	DHEA: 16OH-DHEAS_1	DHEA	Androgen		Hit reaction time SE
cc.16OH_DHEAS_1_m_32w_i_SG_GA_adj	SAB540	hitrtse	35.2399	-0.791838	hormone metabolite	16OH-DHEAS_1	DHEA: 16OH-DHEAS_1	DHEA	Androgen		Hit reaction time SE
cc.16OH_DHEAS_1_m_32w_i_SG_GA_adj	SAB541	hitrtse	158.967	-0.419676	hormone metabolite	16OH-DHEAS_1	DHEA: 16OH-DHEAS_1	DHEA	Androgen		Hit reaction time SE
cc.16OH_DHEAS_1_m_32w_i_SG_GA_adj	SAB541	hitrtse	-148.998	-0.419676	hormone metabolite	16OH-DHEAS_1	DHEA: 16OH-DHEAS_1	DHEA	Androgen		Hit reaction time SE
cc.16OH_DHEAS_1_m_32w_i_SG_GA_adj	SAB541	hitrtse	-40.2643	-0.419676	hormone metabolite	16OH-DHEAS_1	DHEA: 16OH-DHEAS_1	DHEA	Androgen		Hit reaction time SE
cc.16OH_DHEAS_1_m_32w_i_SG_GA_adj	SAB541	hitrtse	-0.0677815	-0.419676	hormone metabolite	16OH-DHEAS_1	DHEA: 16OH-DHEAS_1	DHEA	Androgen		Hit reaction time SE
cc.16OH_DHEAS_1_m_32w_i_SG_GA_adj	SAB542	hitrtse	144.251	2.04089	hormone metabolite	16OH-DHEAS_1	DHEA: 16OH-DHEAS_1	DHEA	Androgen		Hit reaction time SE
cc.16OH_DHEAS_1_m_32w_i_SG_GA_adj	SAB542	hitrtse	-98.2365	2.04089	hormone metabolite	16OH-DHEAS_1	DHEA: 16OH-DHEAS_1	DHEA	Androgen		Hit reaction time SE
cc.16OH_DHEAS_1_m_32w_i_SG_GA_adj	SAB542	hitrtse	-153.738	2.04089	hormone metabolite	16OH-DHEAS_1	DHEA: 16OH-DHEAS_1	DHEA	Androgen		Hit reaction time SE
cc.16OH_DHEAS_1_m_32w_i_SG_GA_adj	SAB542	hitrtse	38.9969	2.04089	hormone metabolite	16OH-DHEAS_1	DHEA: 16OH-DHEAS_1	DHEA	Androgen		Hit reaction time SE
cc.16OH_DHEAS_1_m_32w_i_SG_GA_adj	SAB543	hitrtse	11.3786	0.936611	hormone metabolite	16OH-DHEAS_1	DHEA: 16OH-DHEAS_1	DHEA	Androgen		Hit reaction time SE
cc.16OH_DHEAS_1_m_32w_i_SG_GA_adj	SAB543	hitrtse	-64.0432	0.936611	hormone metabolite	16OH-DHEAS_1	DHEA: 16OH-DHEAS_1	DHEA	Androgen		Hit reaction time SE
cc.16OH_DHEAS_1_m_32w_i_SG_GA_adj	SAB543	hitrtse	156.484	0.936611	hormone metabolite	16OH-DHEAS_1	DHEA: 16OH-DHEAS_1	DHEA	Androgen		Hit reaction time SE
cc.16OH_DHEAS_1_m_32w_i_SG_GA_adj	SAB544	hitrtse	245.6	1.84448	hormone metabolite	16OH-DHEAS_1	DHEA: 16OH-DHEAS_1	DHEA	Androgen		Hit reaction time SE
cc.16OH_DHEAS_1_m_32w_i_SG_GA_adj	SAB544	hitrtse	124.576	1.84448	hormone metabolite	16OH-DHEAS_1	DHEA: 16OH-DHEAS_1	DHEA	Androgen		Hit reaction time SE
cc.16OH_DHEAS_1_m_32w_i_SG_GA_adj	SAB544	hitrtse	-129.572	1.84448	hormone metabolite	16OH-DHEAS_1	DHEA: 16OH-DHEAS_1	DHEA	Androgen		Hit reaction time SE
cc.16OH_DHEAS_1_m_32w_i_SG_GA_adj	SAB544	hitrtse	-70.0107	1.84448	hormone metabolite	16OH-DHEAS_1	DHEA: 16OH-DHEAS_1	DHEA	Androgen		Hit reaction time SE
cc.16OH_DHEAS_1_m_32w_i_SG_GA_adj	SAB545	hitrtse	-135.592	-0.175815	hormone metabolite	16OH-DHEAS_1	DHEA: 16OH-DHEAS_1	DHEA	Androgen		Hit reaction time SE
cc.16OH_DHEAS_1_m_32w_i_SG_GA_adj	SAB545	hitrtse	162.185	-0.175815	hormone metabolite	16OH-DHEAS_1	DHEA: 16OH-DHEAS_1	DHEA	Androgen		Hit reaction time SE
cc.16OH_DHEAS_1_m_32w_i_SG_GA_adj	SAB545	hitrtse	-36.3677	-0.175815	hormone metabolite	16OH-DHEAS_1	DHEA: 16OH-DHEAS_1	DHEA	Androgen		Hit reaction time SE
cc.16OH_DHEAS_1_m_32w_i_SG_GA_adj	SAB547	hitrtse	287.264	-0.933767	hormone metabolite	16OH-DHEAS_1	DHEA: 16OH-DHEAS_1	DHEA	Androgen		Hit reaction time SE
cc.16OH_DHEAS_1_m_32w_i_SG_GA_adj	SAB547	hitrtse	-163.404	-0.933767	hormone metabolite	16OH-DHEAS_1	DHEA: 16OH-DHEAS_1	DHEA	Androgen		Hit reaction time SE
cc.16OH_DHEAS_1_m_32w_i_SG_GA_adj	SAB547	hitrtse	-91.5742	-0.933767	hormone metabolite	16OH-DHEAS_1	DHEA: 16OH-DHEAS_1	DHEA	Androgen		Hit reaction time SE
cc.16OH_DHEAS_1_m_32w_i_SG_GA_adj	SAB547	hitrtse	-37.8303	-0.933767	hormone metabolite	16OH-DHEAS_1	DHEA: 16OH-DHEAS_1	DHEA	Androgen		Hit reaction time SE
cc.16OH_DHEAS_1_m_32w_i_SG_GA_adj	SAB55	hitrtse	-108.845	2.0962	hormone metabolite	16OH-DHEAS_1	DHEA: 16OH-DHEAS_1	DHEA	Androgen		Hit reaction time SE
cc.16OH_DHEAS_1_m_32w_i_SG_GA_adj	SAB55	hitrtse	102.616	2.0962	hormone metabolite	16OH-DHEAS_1	DHEA: 16OH-DHEAS_1	DHEA	Androgen		Hit reaction time SE
cc.16OH_DHEAS_1_m_32w_i_SG_GA_adj	SAB55	hitrtse	5.2188	2.0962	hormone metabolite	16OH-DHEAS_1	DHEA: 16OH-DHEAS_1	DHEA	Androgen		Hit reaction time SE
cc.16OH_DHEAS_1_m_32w_i_SG_GA_adj	SAB550	hitrtse	-130.274	1.0398	hormone metabolite	16OH-DHEAS_1	DHEA: 16OH-DHEAS_1	DHEA	Androgen		Hit reaction time SE
cc.16OH_DHEAS_1_m_32w_i_SG_GA_adj	SAB550	hitrtse	136.524	1.0398	hormone metabolite	16OH-DHEAS_1	DHEA: 16OH-DHEAS_1	DHEA	Androgen		Hit reaction time SE
cc.16OH_DHEAS_1_m_32w_i_SG_GA_adj	SAB550	hitrtse	-86.1048	1.0398	hormone metabolite	16OH-DHEAS_1	DHEA: 16OH-DHEAS_1	DHEA	Androgen		Hit reaction time SE
cc.16OH_DHEAS_1_m_32w_i_SG_GA_adj	SAB550	hitrtse	118.19	1.0398	hormone metabolite	16OH-DHEAS_1	DHEA: 16OH-DHEAS_1	DHEA	Androgen		Hit reaction time SE
cc.16OH_DHEAS_1_m_32w_i_SG_GA_adj	SAB551	hitrtse	123.578	0.286452	hormone metabolite	16OH-DHEAS_1	DHEA: 16OH-DHEAS_1	DHEA	Androgen		Hit reaction time SE
cc.16OH_DHEAS_1_m_32w_i_SG_GA_adj	SAB551	hitrtse	113.576	0.286452	hormone metabolite	16OH-DHEAS_1	DHEA: 16OH-DHEAS_1	DHEA	Androgen		Hit reaction time SE
cc.16OH_DHEAS_1_m_32w_i_SG_GA_adj	SAB551	hitrtse	117.711	0.286452	hormone metabolite	16OH-DHEAS_1	DHEA: 16OH-DHEAS_1	DHEA	Androgen		Hit reaction time SE
cc.16OH_DHEAS_1_m_32w_i_SG_GA_adj	SAB552	hitrtse	-149.443	2.22305	hormone metabolite	16OH-DHEAS_1	DHEA: 16OH-DHEAS_1	DHEA	Androgen		Hit reaction time SE
cc.16OH_DHEAS_1_m_32w_i_SG_GA_adj	SAB552	hitrtse	-40.2749	2.22305	hormone metabolite	16OH-DHEAS_1	DHEA: 16OH-DHEAS_1	DHEA	Androgen		Hit reaction time SE
cc.16OH_DHEAS_1_m_32w_i_SG_GA_adj	SAB552	hitrtse	130.872	2.22305	hormone metabolite	16OH-DHEAS_1	DHEA: 16OH-DHEAS_1	DHEA	Androgen		Hit reaction time SE
cc.16OH_DHEAS_1_m_32w_i_SG_GA_adj	SAB552	hitrtse	146.936	2.22305	hormone metabolite	16OH-DHEAS_1	DHEA: 16OH-DHEAS_1	DHEA	Androgen		Hit reaction time SE
cc.16OH_DHEAS_1_m_32w_i_SG_GA_adj	SAB554	hitrtse	-118.415	-0.33522	hormone metabolite	16OH-DHEAS_1	DHEA: 16OH-DHEAS_1	DHEA	Androgen		Hit reaction time SE
cc.16OH_DHEAS_1_m_32w_i_SG_GA_adj	SAB554	hitrtse	78.2321	-0.33522	hormone metabolite	16OH-DHEAS_1	DHEA: 16OH-DHEAS_1	DHEA	Androgen		Hit reaction time SE
cc.16OH_DHEAS_1_m_32w_i_SG_GA_adj	SAB554	hitrtse	119.445	-0.33522	hormone metabolite	16OH-DHEAS_1	DHEA: 16OH-DHEAS_1	DHEA	Androgen		Hit reaction time SE
cc.16OH_DHEAS_1_m_32w_i_SG_GA_adj	SAB554	hitrtse	-13.1449	-0.33522	hormone metabolite	16OH-DHEAS_1	DHEA: 16OH-DHEAS_1	DHEA	Androgen		Hit reaction time SE
cc.16OH_DHEAS_1_m_32w_i_SG_GA_adj	SAB555	hitrtse	-51.393	-0.975615	hormone metabolite	16OH-DHEAS_1	DHEA: 16OH-DHEAS_1	DHEA	Androgen		Hit reaction time SE
cc.16OH_DHEAS_1_m_32w_i_SG_GA_adj	SAB555	hitrtse	70.9816	-0.975615	hormone metabolite	16OH-DHEAS_1	DHEA: 16OH-DHEAS_1	DHEA	Androgen		Hit reaction time SE
cc.16OH_DHEAS_1_m_32w_i_SG_GA_adj	SAB556	hitrtse	177.59	0.632533	hormone metabolite	16OH-DHEAS_1	DHEA: 16OH-DHEAS_1	DHEA	Androgen		Hit reaction time SE
cc.16OH_DHEAS_1_m_32w_i_SG_GA_adj	SAB556	hitrtse	-149.003	0.632533	hormone metabolite	16OH-DHEAS_1	DHEA: 16OH-DHEAS_1	DHEA	Androgen		Hit reaction time SE
cc.16OH_DHEAS_1_m_32w_i_SG_GA_adj	SAB556	hitrtse	37.8476	0.632533	hormone metabolite	16OH-DHEAS_1	DHEA: 16OH-DHEAS_1	DHEA	Androgen		Hit reaction time SE
cc.16OH_DHEAS_1_m_32w_i_SG_GA_adj	SAB557	hitrtse	-133.87	-4.12801	hormone metabolite	16OH-DHEAS_1	DHEA: 16OH-DHEAS_1	DHEA	Androgen		Hit reaction time SE
cc.16OH_DHEAS_1_m_32w_i_SG_GA_adj	SAB557	hitrtse	156.997	-4.12801	hormone metabolite	16OH-DHEAS_1	DHEA: 16OH-DHEAS_1	DHEA	Androgen		Hit reaction time SE
cc.16OH_DHEAS_1_m_32w_i_SG_GA_adj	SAB56	hitrtse	34.045	-0.0298893	hormone metabolite	16OH-DHEAS_1	DHEA: 16OH-DHEAS_1	DHEA	Androgen		Hit reaction time SE
cc.16OH_DHEAS_1_m_32w_i_SG_GA_adj	SAB56	hitrtse	-66.8163	-0.0298893	hormone metabolite	16OH-DHEAS_1	DHEA: 16OH-DHEAS_1	DHEA	Androgen		Hit reaction time SE
cc.16OH_DHEAS_1_m_32w_i_SG_GA_adj	SAB56	hitrtse	220.277	-0.0298893	hormone metabolite	16OH-DHEAS_1	DHEA: 16OH-DHEAS_1	DHEA	Androgen		Hit reaction time SE
cc.16OH_DHEAS_1_m_32w_i_SG_GA_adj	SAB561	hitrtse	-61.9336	0.54829	hormone metabolite	16OH-DHEAS_1	DHEA: 16OH-DHEAS_1	DHEA	Androgen		Hit reaction time SE
cc.16OH_DHEAS_1_m_32w_i_SG_GA_adj	SAB561	hitrtse	64.1653	0.54829	hormone metabolite	16OH-DHEAS_1	DHEA: 16OH-DHEAS_1	DHEA	Androgen		Hit reaction time SE
cc.16OH_DHEAS_1_m_32w_i_SG_GA_adj	SAB561	hitrtse	101.074	0.54829	hormone metabolite	16OH-DHEAS_1	DHEA: 16OH-DHEAS_1	DHEA	Androgen		Hit reaction time SE
cc.16OH_DHEAS_1_m_32w_i_SG_GA_adj	SAB561	hitrtse	-119.785	0.54829	hormone metabolite	16OH-DHEAS_1	DHEA: 16OH-DHEAS_1	DHEA	Androgen		Hit reaction time SE
cc.16OH_DHEAS_1_m_32w_i_SG_GA_adj	SAB562	hitrtse	72.1129	-0.0233005	hormone metabolite	16OH-DHEAS_1	DHEA: 16OH-DHEAS_1	DHEA	Androgen		Hit reaction time SE
cc.16OH_DHEAS_1_m_32w_i_SG_GA_adj	SAB562	hitrtse	198.564	-0.0233005	hormone metabolite	16OH-DHEAS_1	DHEA: 16OH-DHEAS_1	DHEA	Androgen		Hit reaction time SE
cc.16OH_DHEAS_1_m_32w_i_SG_GA_adj	SAB562	hitrtse	29.7191	-0.0233005	hormone metabolite	16OH-DHEAS_1	DHEA: 16OH-DHEAS_1	DHEA	Androgen		Hit reaction time SE
cc.16OH_DHEAS_1_m_32w_i_SG_GA_adj	SAB562	hitrtse	-154.356	-0.0233005	hormone metabolite	16OH-DHEAS_1	DHEA: 16OH-DHEAS_1	DHEA	Androgen		Hit reaction time SE
cc.16OH_DHEAS_1_m_32w_i_SG_GA_adj	SAB565	hitrtse	70.0306	2.04856	hormone metabolite	16OH-DHEAS_1	DHEA: 16OH-DHEAS_1	DHEA	Androgen		Hit reaction time SE
cc.16OH_DHEAS_1_m_32w_i_SG_GA_adj	SAB565	hitrtse	-23.8914	2.04856	hormone metabolite	16OH-DHEAS_1	DHEA: 16OH-DHEAS_1	DHEA	Androgen		Hit reaction time SE
cc.16OH_DHEAS_1_m_32w_i_SG_GA_adj	SAB565	hitrtse	-138.636	2.04856	hormone metabolite	16OH-DHEAS_1	DHEA: 16OH-DHEAS_1	DHEA	Androgen		Hit reaction time SE
cc.16OH_DHEAS_1_m_32w_i_SG_GA_adj	SAB566	hitrtse	91.7762	-0.731557	hormone metabolite	16OH-DHEAS_1	DHEA: 16OH-DHEAS_1	DHEA	Androgen		Hit reaction time SE
cc.16OH_DHEAS_1_m_32w_i_SG_GA_adj	SAB566	hitrtse	168.573	-0.731557	hormone metabolite	16OH-DHEAS_1	DHEA: 16OH-DHEAS_1	DHEA	Androgen		Hit reaction time SE
cc.16OH_DHEAS_1_m_32w_i_SG_GA_adj	SAB566	hitrtse	14.1933	-0.731557	hormone metabolite	16OH-DHEAS_1	DHEA: 16OH-DHEAS_1	DHEA	Androgen		Hit reaction time SE
cc.16OH_DHEAS_1_m_32w_i_SG_GA_adj	SAB566	hitrtse	-191.34	-0.731557	hormone metabolite	16OH-DHEAS_1	DHEA: 16OH-DHEAS_1	DHEA	Androgen		Hit reaction time SE
cc.16OH_DHEAS_1_m_32w_i_SG_GA_adj	SAB567	hitrtse	-174.712	3.32544	hormone metabolite	16OH-DHEAS_1	DHEA: 16OH-DHEAS_1	DHEA	Androgen		Hit reaction time SE
cc.16OH_DHEAS_1_m_32w_i_SG_GA_adj	SAB567	hitrtse	-58.2125	3.32544	hormone metabolite	16OH-DHEAS_1	DHEA: 16OH-DHEAS_1	DHEA	Androgen		Hit reaction time SE
cc.16OH_DHEAS_1_m_32w_i_SG_GA_adj	SAB567	hitrtse	61.5002	3.32544	hormone metabolite	16OH-DHEAS_1	DHEA: 16OH-DHEAS_1	DHEA	Androgen		Hit reaction time SE
cc.16OH_DHEAS_1_m_32w_i_SG_GA_adj	SAB567	hitrtse	-141.188	3.32544	hormone metabolite	16OH-DHEAS_1	DHEA: 16OH-DHEAS_1	DHEA	Androgen		Hit reaction time SE
cc.16OH_DHEAS_1_m_32w_i_SG_GA_adj	SAB568	hitrtse	-142.839	-3.60042	hormone metabolite	16OH-DHEAS_1	DHEA: 16OH-DHEAS_1	DHEA	Androgen		Hit reaction time SE
cc.16OH_DHEAS_1_m_32w_i_SG_GA_adj	SAB568	hitrtse	37.42	-3.60042	hormone metabolite	16OH-DHEAS_1	DHEA: 16OH-DHEAS_1	DHEA	Androgen		Hit reaction time SE
cc.16OH_DHEAS_1_m_32w_i_SG_GA_adj	SAB568	hitrtse	-15.3368	-3.60042	hormone metabolite	16OH-DHEAS_1	DHEA: 16OH-DHEAS_1	DHEA	Androgen		Hit reaction time SE
cc.16OH_DHEAS_1_m_32w_i_SG_GA_adj	SAB568	hitrtse	-113.757	-3.60042	hormone metabolite	16OH-DHEAS_1	DHEA: 16OH-DHEAS_1	DHEA	Androgen		Hit reaction time SE
cc.16OH_DHEAS_1_m_32w_i_SG_GA_adj	SAB569	hitrtse	34.6685	0	hormone metabolite	16OH-DHEAS_1	DHEA: 16OH-DHEAS_1	DHEA	Androgen		Hit reaction time SE
cc.16OH_DHEAS_1_m_32w_i_SG_GA_adj	SAB569	hitrtse	-158.714	0	hormone metabolite	16OH-DHEAS_1	DHEA: 16OH-DHEAS_1	DHEA	Androgen		Hit reaction time SE
cc.16OH_DHEAS_1_m_32w_i_SG_GA_adj	SAB569	hitrtse	93.1295	0	hormone metabolite	16OH-DHEAS_1	DHEA: 16OH-DHEAS_1	DHEA	Androgen		Hit reaction time SE
cc.16OH_DHEAS_1_m_32w_i_SG_GA_adj	SAB569	hitrtse	-99.5434	0	hormone metabolite	16OH-DHEAS_1	DHEA: 16OH-DHEAS_1	DHEA	Androgen		Hit reaction time SE
cc.16OH_DHEAS_1_m_32w_i_SG_GA_adj	SAB57	hitrtse	66.6784	-1.44916	hormone metabolite	16OH-DHEAS_1	DHEA: 16OH-DHEAS_1	DHEA	Androgen		Hit reaction time SE
cc.16OH_DHEAS_1_m_32w_i_SG_GA_adj	SAB570	hitrtse	232.516	1.02736	hormone metabolite	16OH-DHEAS_1	DHEA: 16OH-DHEAS_1	DHEA	Androgen		Hit reaction time SE
cc.16OH_DHEAS_1_m_32w_i_SG_GA_adj	SAB570	hitrtse	18.1571	1.02736	hormone metabolite	16OH-DHEAS_1	DHEA: 16OH-DHEAS_1	DHEA	Androgen		Hit reaction time SE
cc.16OH_DHEAS_1_m_32w_i_SG_GA_adj	SAB570	hitrtse	-124.034	1.02736	hormone metabolite	16OH-DHEAS_1	DHEA: 16OH-DHEAS_1	DHEA	Androgen		Hit reaction time SE
cc.16OH_DHEAS_1_m_32w_i_SG_GA_adj	SAB570	hitrtse	39.0659	1.02736	hormone metabolite	16OH-DHEAS_1	DHEA: 16OH-DHEAS_1	DHEA	Androgen		Hit reaction time SE
cc.16OH_DHEAS_1_m_32w_i_SG_GA_adj	SAB571	hitrtse	-135.227	1.69697	hormone metabolite	16OH-DHEAS_1	DHEA: 16OH-DHEAS_1	DHEA	Androgen		Hit reaction time SE
cc.16OH_DHEAS_1_m_32w_i_SG_GA_adj	SAB571	hitrtse	104.897	1.69697	hormone metabolite	16OH-DHEAS_1	DHEA: 16OH-DHEAS_1	DHEA	Androgen		Hit reaction time SE
cc.16OH_DHEAS_1_m_32w_i_SG_GA_adj	SAB571	hitrtse	-27.4749	1.69697	hormone metabolite	16OH-DHEAS_1	DHEA: 16OH-DHEAS_1	DHEA	Androgen		Hit reaction time SE
cc.16OH_DHEAS_1_m_32w_i_SG_GA_adj	SAB572	hitrtse	187.98	1.65768	hormone metabolite	16OH-DHEAS_1	DHEA: 16OH-DHEAS_1	DHEA	Androgen		Hit reaction time SE
cc.16OH_DHEAS_1_m_32w_i_SG_GA_adj	SAB572	hitrtse	3.32719	1.65768	hormone metabolite	16OH-DHEAS_1	DHEA: 16OH-DHEAS_1	DHEA	Androgen		Hit reaction time SE
cc.16OH_DHEAS_1_m_32w_i_SG_GA_adj	SAB572	hitrtse	-51.2675	1.65768	hormone metabolite	16OH-DHEAS_1	DHEA: 16OH-DHEAS_1	DHEA	Androgen		Hit reaction time SE
cc.16OH_DHEAS_1_m_32w_i_SG_GA_adj	SAB573	hitrtse	105.573	-0.270688	hormone metabolite	16OH-DHEAS_1	DHEA: 16OH-DHEAS_1	DHEA	Androgen		Hit reaction time SE
cc.16OH_DHEAS_1_m_32w_i_SG_GA_adj	SAB573	hitrtse	-166.58	-0.270688	hormone metabolite	16OH-DHEAS_1	DHEA: 16OH-DHEAS_1	DHEA	Androgen		Hit reaction time SE
cc.16OH_DHEAS_1_m_32w_i_SG_GA_adj	SAB573	hitrtse	137.634	-0.270688	hormone metabolite	16OH-DHEAS_1	DHEA: 16OH-DHEAS_1	DHEA	Androgen		Hit reaction time SE
cc.16OH_DHEAS_1_m_32w_i_SG_GA_adj	SAB573	hitrtse	-29.618	-0.270688	hormone metabolite	16OH-DHEAS_1	DHEA: 16OH-DHEAS_1	DHEA	Androgen		Hit reaction time SE
cc.16OH_DHEAS_1_m_32w_i_SG_GA_adj	SAB575	hitrtse	77.3407	0.787167	hormone metabolite	16OH-DHEAS_1	DHEA: 16OH-DHEAS_1	DHEA	Androgen		Hit reaction time SE
cc.16OH_DHEAS_1_m_32w_i_SG_GA_adj	SAB575	hitrtse	-64.4053	0.787167	hormone metabolite	16OH-DHEAS_1	DHEA: 16OH-DHEAS_1	DHEA	Androgen		Hit reaction time SE
cc.16OH_DHEAS_1_m_32w_i_SG_GA_adj	SAB575	hitrtse	-142.72	0.787167	hormone metabolite	16OH-DHEAS_1	DHEA: 16OH-DHEAS_1	DHEA	Androgen		Hit reaction time SE
cc.16OH_DHEAS_1_m_32w_i_SG_GA_adj	SAB576	hitrtse	100.903	0.561611	hormone metabolite	16OH-DHEAS_1	DHEA: 16OH-DHEAS_1	DHEA	Androgen		Hit reaction time SE
cc.16OH_DHEAS_1_m_32w_i_SG_GA_adj	SAB576	hitrtse	-118.967	0.561611	hormone metabolite	16OH-DHEAS_1	DHEA: 16OH-DHEAS_1	DHEA	Androgen		Hit reaction time SE
cc.16OH_DHEAS_1_m_32w_i_SG_GA_adj	SAB576	hitrtse	38.5775	0.561611	hormone metabolite	16OH-DHEAS_1	DHEA: 16OH-DHEAS_1	DHEA	Androgen		Hit reaction time SE
cc.16OH_DHEAS_1_m_32w_i_SG_GA_adj	SAB576	hitrtse	-130.946	0.561611	hormone metabolite	16OH-DHEAS_1	DHEA: 16OH-DHEAS_1	DHEA	Androgen		Hit reaction time SE
cc.16OH_DHEAS_1_m_32w_i_SG_GA_adj	SAB577	hitrtse	117.22	1.78586	hormone metabolite	16OH-DHEAS_1	DHEA: 16OH-DHEAS_1	DHEA	Androgen		Hit reaction time SE
cc.16OH_DHEAS_1_m_32w_i_SG_GA_adj	SAB577	hitrtse	-146.362	1.78586	hormone metabolite	16OH-DHEAS_1	DHEA: 16OH-DHEAS_1	DHEA	Androgen		Hit reaction time SE
cc.16OH_DHEAS_1_m_32w_i_SG_GA_adj	SAB578	hitrtse	20.9361	1.29977	hormone metabolite	16OH-DHEAS_1	DHEA: 16OH-DHEAS_1	DHEA	Androgen		Hit reaction time SE
cc.16OH_DHEAS_1_m_32w_i_SG_GA_adj	SAB578	hitrtse	-147.517	1.29977	hormone metabolite	16OH-DHEAS_1	DHEA: 16OH-DHEAS_1	DHEA	Androgen		Hit reaction time SE
cc.16OH_DHEAS_1_m_32w_i_SG_GA_adj	SAB578	hitrtse	-119.852	1.29977	hormone metabolite	16OH-DHEAS_1	DHEA: 16OH-DHEAS_1	DHEA	Androgen		Hit reaction time SE
cc.16OH_DHEAS_1_m_32w_i_SG_GA_adj	SAB578	hitrtse	139.078	1.29977	hormone metabolite	16OH-DHEAS_1	DHEA: 16OH-DHEAS_1	DHEA	Androgen		Hit reaction time SE
cc.16OH_DHEAS_1_m_32w_i_SG_GA_adj	SAB58	hitrtse	114.017	-0.21874	hormone metabolite	16OH-DHEAS_1	DHEA: 16OH-DHEAS_1	DHEA	Androgen		Hit reaction time SE
cc.16OH_DHEAS_1_m_32w_i_SG_GA_adj	SAB58	hitrtse	-36.9469	-0.21874	hormone metabolite	16OH-DHEAS_1	DHEA: 16OH-DHEAS_1	DHEA	Androgen		Hit reaction time SE
cc.16OH_DHEAS_1_m_32w_i_SG_GA_adj	SAB58	hitrtse	39.4309	-0.21874	hormone metabolite	16OH-DHEAS_1	DHEA: 16OH-DHEAS_1	DHEA	Androgen		Hit reaction time SE
cc.16OH_DHEAS_1_m_32w_i_SG_GA_adj	SAB580	hitrtse	-96.4677	2.53365	hormone metabolite	16OH-DHEAS_1	DHEA: 16OH-DHEAS_1	DHEA	Androgen		Hit reaction time SE
cc.16OH_DHEAS_1_m_32w_i_SG_GA_adj	SAB580	hitrtse	84.6763	2.53365	hormone metabolite	16OH-DHEAS_1	DHEA: 16OH-DHEAS_1	DHEA	Androgen		Hit reaction time SE
cc.16OH_DHEAS_1_m_32w_i_SG_GA_adj	SAB580	hitrtse	82.9236	2.53365	hormone metabolite	16OH-DHEAS_1	DHEA: 16OH-DHEAS_1	DHEA	Androgen		Hit reaction time SE
cc.16OH_DHEAS_1_m_32w_i_SG_GA_adj	SAB581	hitrtse	31.3494	1.31257	hormone metabolite	16OH-DHEAS_1	DHEA: 16OH-DHEAS_1	DHEA	Androgen		Hit reaction time SE
cc.16OH_DHEAS_1_m_32w_i_SG_GA_adj	SAB581	hitrtse	-155.055	1.31257	hormone metabolite	16OH-DHEAS_1	DHEA: 16OH-DHEAS_1	DHEA	Androgen		Hit reaction time SE
cc.16OH_DHEAS_1_m_32w_i_SG_GA_adj	SAB581	hitrtse	-10.4536	1.31257	hormone metabolite	16OH-DHEAS_1	DHEA: 16OH-DHEAS_1	DHEA	Androgen		Hit reaction time SE
cc.16OH_DHEAS_1_m_32w_i_SG_GA_adj	SAB582	hitrtse	-7.81088	0.567463	hormone metabolite	16OH-DHEAS_1	DHEA: 16OH-DHEAS_1	DHEA	Androgen		Hit reaction time SE
cc.16OH_DHEAS_1_m_32w_i_SG_GA_adj	SAB582	hitrtse	78.8597	0.567463	hormone metabolite	16OH-DHEAS_1	DHEA: 16OH-DHEAS_1	DHEA	Androgen		Hit reaction time SE
cc.16OH_DHEAS_1_m_32w_i_SG_GA_adj	SAB582	hitrtse	-122.804	0.567463	hormone metabolite	16OH-DHEAS_1	DHEA: 16OH-DHEAS_1	DHEA	Androgen		Hit reaction time SE
cc.16OH_DHEAS_1_m_32w_i_SG_GA_adj	SAB582	hitrtse	-71.8528	0.567463	hormone metabolite	16OH-DHEAS_1	DHEA: 16OH-DHEAS_1	DHEA	Androgen		Hit reaction time SE
cc.16OH_DHEAS_1_m_32w_i_SG_GA_adj	SAB583	hitrtse	123.371	-2.36406	hormone metabolite	16OH-DHEAS_1	DHEA: 16OH-DHEAS_1	DHEA	Androgen		Hit reaction time SE
cc.16OH_DHEAS_1_m_32w_i_SG_GA_adj	SAB583	hitrtse	81.0802	-2.36406	hormone metabolite	16OH-DHEAS_1	DHEA: 16OH-DHEAS_1	DHEA	Androgen		Hit reaction time SE
cc.16OH_DHEAS_1_m_32w_i_SG_GA_adj	SAB583	hitrtse	-137.793	-2.36406	hormone metabolite	16OH-DHEAS_1	DHEA: 16OH-DHEAS_1	DHEA	Androgen		Hit reaction time SE
cc.16OH_DHEAS_1_m_32w_i_SG_GA_adj	SAB583	hitrtse	40.0182	-2.36406	hormone metabolite	16OH-DHEAS_1	DHEA: 16OH-DHEAS_1	DHEA	Androgen		Hit reaction time SE
cc.16OH_DHEAS_1_m_32w_i_SG_GA_adj	SAB585	hitrtse	-173.335	0.231248	hormone metabolite	16OH-DHEAS_1	DHEA: 16OH-DHEAS_1	DHEA	Androgen		Hit reaction time SE
cc.16OH_DHEAS_1_m_32w_i_SG_GA_adj	SAB585	hitrtse	-36.368	0.231248	hormone metabolite	16OH-DHEAS_1	DHEA: 16OH-DHEAS_1	DHEA	Androgen		Hit reaction time SE
cc.16OH_DHEAS_1_m_32w_i_SG_GA_adj	SAB585	hitrtse	-73.4505	0.231248	hormone metabolite	16OH-DHEAS_1	DHEA: 16OH-DHEAS_1	DHEA	Androgen		Hit reaction time SE
cc.16OH_DHEAS_1_m_32w_i_SG_GA_adj	SAB587	hitrtse	121.141	0.274288	hormone metabolite	16OH-DHEAS_1	DHEA: 16OH-DHEAS_1	DHEA	Androgen		Hit reaction time SE
cc.16OH_DHEAS_1_m_32w_i_SG_GA_adj	SAB587	hitrtse	-131.12	0.274288	hormone metabolite	16OH-DHEAS_1	DHEA: 16OH-DHEAS_1	DHEA	Androgen		Hit reaction time SE
cc.16OH_DHEAS_1_m_32w_i_SG_GA_adj	SAB587	hitrtse	-23.0702	0.274288	hormone metabolite	16OH-DHEAS_1	DHEA: 16OH-DHEAS_1	DHEA	Androgen		Hit reaction time SE
cc.16OH_DHEAS_1_m_32w_i_SG_GA_adj	SAB587	hitrtse	192.194	0.274288	hormone metabolite	16OH-DHEAS_1	DHEA: 16OH-DHEAS_1	DHEA	Androgen		Hit reaction time SE
cc.16OH_DHEAS_1_m_32w_i_SG_GA_adj	SAB588	hitrtse	186.508	1.76467	hormone metabolite	16OH-DHEAS_1	DHEA: 16OH-DHEAS_1	DHEA	Androgen		Hit reaction time SE
cc.16OH_DHEAS_1_m_32w_i_SG_GA_adj	SAB588	hitrtse	80.104	1.76467	hormone metabolite	16OH-DHEAS_1	DHEA: 16OH-DHEAS_1	DHEA	Androgen		Hit reaction time SE
cc.16OH_DHEAS_1_m_32w_i_SG_GA_adj	SAB588	hitrtse	-113.348	1.76467	hormone metabolite	16OH-DHEAS_1	DHEA: 16OH-DHEAS_1	DHEA	Androgen		Hit reaction time SE
cc.16OH_DHEAS_1_m_32w_i_SG_GA_adj	SAB588	hitrtse	-15.484	1.76467	hormone metabolite	16OH-DHEAS_1	DHEA: 16OH-DHEAS_1	DHEA	Androgen		Hit reaction time SE
cc.16OH_DHEAS_1_m_32w_i_SG_GA_adj	SAB589	hitrtse	21.2882	1.27914	hormone metabolite	16OH-DHEAS_1	DHEA: 16OH-DHEAS_1	DHEA	Androgen		Hit reaction time SE
cc.16OH_DHEAS_1_m_32w_i_SG_GA_adj	SAB589	hitrtse	-118.089	1.27914	hormone metabolite	16OH-DHEAS_1	DHEA: 16OH-DHEAS_1	DHEA	Androgen		Hit reaction time SE
cc.16OH_DHEAS_1_m_32w_i_SG_GA_adj	SAB59	hitrtse	93.0234	-0.43695	hormone metabolite	16OH-DHEAS_1	DHEA: 16OH-DHEAS_1	DHEA	Androgen		Hit reaction time SE
cc.16OH_DHEAS_1_m_32w_i_SG_GA_adj	SAB59	hitrtse	57.4685	-0.43695	hormone metabolite	16OH-DHEAS_1	DHEA: 16OH-DHEAS_1	DHEA	Androgen		Hit reaction time SE
cc.16OH_DHEAS_1_m_32w_i_SG_GA_adj	SAB59	hitrtse	-78.0384	-0.43695	hormone metabolite	16OH-DHEAS_1	DHEA: 16OH-DHEAS_1	DHEA	Androgen		Hit reaction time SE
cc.16OH_DHEAS_1_m_32w_i_SG_GA_adj	SAB590	hitrtse	-198.139	0.105401	hormone metabolite	16OH-DHEAS_1	DHEA: 16OH-DHEAS_1	DHEA	Androgen		Hit reaction time SE
cc.16OH_DHEAS_1_m_32w_i_SG_GA_adj	SAB590	hitrtse	67.7362	0.105401	hormone metabolite	16OH-DHEAS_1	DHEA: 16OH-DHEAS_1	DHEA	Androgen		Hit reaction time SE
cc.16OH_DHEAS_1_m_32w_i_SG_GA_adj	SAB590	hitrtse	-152.353	0.105401	hormone metabolite	16OH-DHEAS_1	DHEA: 16OH-DHEAS_1	DHEA	Androgen		Hit reaction time SE
cc.16OH_DHEAS_1_m_32w_i_SG_GA_adj	SAB590	hitrtse	26.3497	0.105401	hormone metabolite	16OH-DHEAS_1	DHEA: 16OH-DHEAS_1	DHEA	Androgen		Hit reaction time SE
cc.16OH_DHEAS_1_m_32w_i_SG_GA_adj	SAB592	hitrtse	64.4005	-0.29568	hormone metabolite	16OH-DHEAS_1	DHEA: 16OH-DHEAS_1	DHEA	Androgen		Hit reaction time SE
cc.16OH_DHEAS_1_m_32w_i_SG_GA_adj	SAB592	hitrtse	-141.22	-0.29568	hormone metabolite	16OH-DHEAS_1	DHEA: 16OH-DHEAS_1	DHEA	Androgen		Hit reaction time SE
cc.16OH_DHEAS_1_m_32w_i_SG_GA_adj	SAB592	hitrtse	-13.1802	-0.29568	hormone metabolite	16OH-DHEAS_1	DHEA: 16OH-DHEAS_1	DHEA	Androgen		Hit reaction time SE
cc.16OH_DHEAS_1_m_32w_i_SG_GA_adj	SAB592	hitrtse	-14.3546	-0.29568	hormone metabolite	16OH-DHEAS_1	DHEA: 16OH-DHEAS_1	DHEA	Androgen		Hit reaction time SE
cc.16OH_DHEAS_1_m_32w_i_SG_GA_adj	SAB594	hitrtse	-153.054	1.31885	hormone metabolite	16OH-DHEAS_1	DHEA: 16OH-DHEAS_1	DHEA	Androgen		Hit reaction time SE
cc.16OH_DHEAS_1_m_32w_i_SG_GA_adj	SAB594	hitrtse	35.0383	1.31885	hormone metabolite	16OH-DHEAS_1	DHEA: 16OH-DHEAS_1	DHEA	Androgen		Hit reaction time SE
cc.16OH_DHEAS_1_m_32w_i_SG_GA_adj	SAB594	hitrtse	123.741	1.31885	hormone metabolite	16OH-DHEAS_1	DHEA: 16OH-DHEAS_1	DHEA	Androgen		Hit reaction time SE
cc.16OH_DHEAS_1_m_32w_i_SG_GA_adj	SAB594	hitrtse	-114.307	1.31885	hormone metabolite	16OH-DHEAS_1	DHEA: 16OH-DHEAS_1	DHEA	Androgen		Hit reaction time SE
cc.16OH_DHEAS_1_m_32w_i_SG_GA_adj	SAB595	hitrtse	-164.029	-2.43657	hormone metabolite	16OH-DHEAS_1	DHEA: 16OH-DHEAS_1	DHEA	Androgen		Hit reaction time SE
cc.16OH_DHEAS_1_m_32w_i_SG_GA_adj	SAB595	hitrtse	206.263	-2.43657	hormone metabolite	16OH-DHEAS_1	DHEA: 16OH-DHEAS_1	DHEA	Androgen		Hit reaction time SE
cc.16OH_DHEAS_1_m_32w_i_SG_GA_adj	SAB595	hitrtse	-156.382	-2.43657	hormone metabolite	16OH-DHEAS_1	DHEA: 16OH-DHEAS_1	DHEA	Androgen		Hit reaction time SE
cc.16OH_DHEAS_1_m_32w_i_SG_GA_adj	SAB595	hitrtse	48.7282	-2.43657	hormone metabolite	16OH-DHEAS_1	DHEA: 16OH-DHEAS_1	DHEA	Androgen		Hit reaction time SE
cc.16OH_DHEAS_1_m_32w_i_SG_GA_adj	SAB596	hitrtse	-97.6548	-2.09822	hormone metabolite	16OH-DHEAS_1	DHEA: 16OH-DHEAS_1	DHEA	Androgen		Hit reaction time SE
cc.16OH_DHEAS_1_m_32w_i_SG_GA_adj	SAB596	hitrtse	118.075	-2.09822	hormone metabolite	16OH-DHEAS_1	DHEA: 16OH-DHEAS_1	DHEA	Androgen		Hit reaction time SE
cc.16OH_DHEAS_1_m_32w_i_SG_GA_adj	SAB596	hitrtse	89.9292	-2.09822	hormone metabolite	16OH-DHEAS_1	DHEA: 16OH-DHEAS_1	DHEA	Androgen		Hit reaction time SE
cc.16OH_DHEAS_1_m_32w_i_SG_GA_adj	SAB596	hitrtse	-175.844	-2.09822	hormone metabolite	16OH-DHEAS_1	DHEA: 16OH-DHEAS_1	DHEA	Androgen		Hit reaction time SE
cc.16OH_DHEAS_1_m_32w_i_SG_GA_adj	SAB597	hitrtse	24.9498	-0.605376	hormone metabolite	16OH-DHEAS_1	DHEA: 16OH-DHEAS_1	DHEA	Androgen		Hit reaction time SE
cc.16OH_DHEAS_1_m_32w_i_SG_GA_adj	SAB597	hitrtse	46.9262	-0.605376	hormone metabolite	16OH-DHEAS_1	DHEA: 16OH-DHEAS_1	DHEA	Androgen		Hit reaction time SE
cc.16OH_DHEAS_1_m_32w_i_SG_GA_adj	SAB597	hitrtse	136.12	-0.605376	hormone metabolite	16OH-DHEAS_1	DHEA: 16OH-DHEAS_1	DHEA	Androgen		Hit reaction time SE
cc.16OH_DHEAS_1_m_32w_i_SG_GA_adj	SAB597	hitrtse	-156.431	-0.605376	hormone metabolite	16OH-DHEAS_1	DHEA: 16OH-DHEAS_1	DHEA	Androgen		Hit reaction time SE
cc.16OH_DHEAS_1_m_32w_i_SG_GA_adj	SAB598	hitrtse	177.288	1.57808	hormone metabolite	16OH-DHEAS_1	DHEA: 16OH-DHEAS_1	DHEA	Androgen		Hit reaction time SE
cc.16OH_DHEAS_1_m_32w_i_SG_GA_adj	SAB598	hitrtse	-133.571	1.57808	hormone metabolite	16OH-DHEAS_1	DHEA: 16OH-DHEAS_1	DHEA	Androgen		Hit reaction time SE
cc.16OH_DHEAS_1_m_32w_i_SG_GA_adj	SAB598	hitrtse	-108.654	1.57808	hormone metabolite	16OH-DHEAS_1	DHEA: 16OH-DHEAS_1	DHEA	Androgen		Hit reaction time SE
cc.16OH_DHEAS_1_m_32w_i_SG_GA_adj	SAB599	hitrtse	-76.0071	-0.498025	hormone metabolite	16OH-DHEAS_1	DHEA: 16OH-DHEAS_1	DHEA	Androgen		Hit reaction time SE
cc.16OH_DHEAS_1_m_32w_i_SG_GA_adj	SAB599	hitrtse	-75.6757	-0.498025	hormone metabolite	16OH-DHEAS_1	DHEA: 16OH-DHEAS_1	DHEA	Androgen		Hit reaction time SE
cc.16OH_DHEAS_1_m_32w_i_SG_GA_adj	SAB599	hitrtse	81.9086	-0.498025	hormone metabolite	16OH-DHEAS_1	DHEA: 16OH-DHEAS_1	DHEA	Androgen		Hit reaction time SE
cc.16OH_DHEAS_1_m_32w_i_SG_GA_adj	SAB599	hitrtse	-162.267	-0.498025	hormone metabolite	16OH-DHEAS_1	DHEA: 16OH-DHEAS_1	DHEA	Androgen		Hit reaction time SE
cc.16OH_DHEAS_1_m_32w_i_SG_GA_adj	SAB60	hitrtse	47.0729	1.45837	hormone metabolite	16OH-DHEAS_1	DHEA: 16OH-DHEAS_1	DHEA	Androgen		Hit reaction time SE
cc.16OH_DHEAS_1_m_32w_i_SG_GA_adj	SAB60	hitrtse	-7.44805	1.45837	hormone metabolite	16OH-DHEAS_1	DHEA: 16OH-DHEAS_1	DHEA	Androgen		Hit reaction time SE
cc.16OH_DHEAS_1_m_32w_i_SG_GA_adj	SAB600	hitrtse	-93.7677	0.560748	hormone metabolite	16OH-DHEAS_1	DHEA: 16OH-DHEAS_1	DHEA	Androgen		Hit reaction time SE
cc.16OH_DHEAS_1_m_32w_i_SG_GA_adj	SAB600	hitrtse	80.7309	0.560748	hormone metabolite	16OH-DHEAS_1	DHEA: 16OH-DHEAS_1	DHEA	Androgen		Hit reaction time SE
cc.16OH_DHEAS_1_m_32w_i_SG_GA_adj	SAB600	hitrtse	-145.473	0.560748	hormone metabolite	16OH-DHEAS_1	DHEA: 16OH-DHEAS_1	DHEA	Androgen		Hit reaction time SE
cc.16OH_DHEAS_1_m_32w_i_SG_GA_adj	SAB600	hitrtse	-150.845	0.560748	hormone metabolite	16OH-DHEAS_1	DHEA: 16OH-DHEAS_1	DHEA	Androgen		Hit reaction time SE
cc.16OH_DHEAS_1_m_32w_i_SG_GA_adj	SAB604	hitrtse	-75.1964	-0.566153	hormone metabolite	16OH-DHEAS_1	DHEA: 16OH-DHEAS_1	DHEA	Androgen		Hit reaction time SE
cc.16OH_DHEAS_1_m_32w_i_SG_GA_adj	SAB604	hitrtse	-129.935	-0.566153	hormone metabolite	16OH-DHEAS_1	DHEA: 16OH-DHEAS_1	DHEA	Androgen		Hit reaction time SE
cc.16OH_DHEAS_1_m_32w_i_SG_GA_adj	SAB604	hitrtse	-156.099	-0.566153	hormone metabolite	16OH-DHEAS_1	DHEA: 16OH-DHEAS_1	DHEA	Androgen		Hit reaction time SE
cc.16OH_DHEAS_1_m_32w_i_SG_GA_adj	SAB604	hitrtse	108.915	-0.566153	hormone metabolite	16OH-DHEAS_1	DHEA: 16OH-DHEAS_1	DHEA	Androgen		Hit reaction time SE
cc.16OH_DHEAS_1_m_32w_i_SG_GA_adj	SAB605	hitrtse	33.9464	0.655668	hormone metabolite	16OH-DHEAS_1	DHEA: 16OH-DHEAS_1	DHEA	Androgen		Hit reaction time SE
cc.16OH_DHEAS_1_m_32w_i_SG_GA_adj	SAB605	hitrtse	-13.0776	0.655668	hormone metabolite	16OH-DHEAS_1	DHEA: 16OH-DHEAS_1	DHEA	Androgen		Hit reaction time SE
cc.16OH_DHEAS_1_m_32w_i_SG_GA_adj	SAB605	hitrtse	-118.368	0.655668	hormone metabolite	16OH-DHEAS_1	DHEA: 16OH-DHEAS_1	DHEA	Androgen		Hit reaction time SE
cc.16OH_DHEAS_1_m_32w_i_SG_GA_adj	SAB605	hitrtse	212.416	0.655668	hormone metabolite	16OH-DHEAS_1	DHEA: 16OH-DHEAS_1	DHEA	Androgen		Hit reaction time SE
cc.16OH_DHEAS_1_m_32w_i_SG_GA_adj	SAB607	hitrtse	197.074	0.777107	hormone metabolite	16OH-DHEAS_1	DHEA: 16OH-DHEAS_1	DHEA	Androgen		Hit reaction time SE
cc.16OH_DHEAS_1_m_32w_i_SG_GA_adj	SAB607	hitrtse	-141.739	0.777107	hormone metabolite	16OH-DHEAS_1	DHEA: 16OH-DHEAS_1	DHEA	Androgen		Hit reaction time SE
cc.16OH_DHEAS_1_m_32w_i_SG_GA_adj	SAB607	hitrtse	11.9655	0.777107	hormone metabolite	16OH-DHEAS_1	DHEA: 16OH-DHEAS_1	DHEA	Androgen		Hit reaction time SE
cc.16OH_DHEAS_1_m_32w_i_SG_GA_adj	SAB607	hitrtse	-5.32886	0.777107	hormone metabolite	16OH-DHEAS_1	DHEA: 16OH-DHEAS_1	DHEA	Androgen		Hit reaction time SE
cc.16OH_DHEAS_1_m_32w_i_SG_GA_adj	SAB608	hitrtse	24.2337	2.01404	hormone metabolite	16OH-DHEAS_1	DHEA: 16OH-DHEAS_1	DHEA	Androgen		Hit reaction time SE
cc.16OH_DHEAS_1_m_32w_i_SG_GA_adj	SAB608	hitrtse	-2.34986	2.01404	hormone metabolite	16OH-DHEAS_1	DHEA: 16OH-DHEAS_1	DHEA	Androgen		Hit reaction time SE
cc.16OH_DHEAS_1_m_32w_i_SG_GA_adj	SAB608	hitrtse	-142.77	2.01404	hormone metabolite	16OH-DHEAS_1	DHEA: 16OH-DHEAS_1	DHEA	Androgen		Hit reaction time SE
cc.16OH_DHEAS_1_m_32w_i_SG_GA_adj	SAB608	hitrtse	22.7751	2.01404	hormone metabolite	16OH-DHEAS_1	DHEA: 16OH-DHEAS_1	DHEA	Androgen		Hit reaction time SE
cc.16OH_DHEAS_1_m_32w_i_SG_GA_adj	SAB610	hitrtse	-152.36	0.311446	hormone metabolite	16OH-DHEAS_1	DHEA: 16OH-DHEAS_1	DHEA	Androgen		Hit reaction time SE
cc.16OH_DHEAS_1_m_32w_i_SG_GA_adj	SAB610	hitrtse	-147.645	0.311446	hormone metabolite	16OH-DHEAS_1	DHEA: 16OH-DHEAS_1	DHEA	Androgen		Hit reaction time SE
cc.16OH_DHEAS_1_m_32w_i_SG_GA_adj	SAB610	hitrtse	-44.6439	0.311446	hormone metabolite	16OH-DHEAS_1	DHEA: 16OH-DHEAS_1	DHEA	Androgen		Hit reaction time SE
cc.16OH_DHEAS_1_m_32w_i_SG_GA_adj	SAB610	hitrtse	1.66672	0.311446	hormone metabolite	16OH-DHEAS_1	DHEA: 16OH-DHEAS_1	DHEA	Androgen		Hit reaction time SE
cc.16OH_DHEAS_1_m_32w_i_SG_GA_adj	SAB613	hitrtse	-113.55	2.5361	hormone metabolite	16OH-DHEAS_1	DHEA: 16OH-DHEAS_1	DHEA	Androgen		Hit reaction time SE
cc.16OH_DHEAS_1_m_32w_i_SG_GA_adj	SAB613	hitrtse	84.8974	2.5361	hormone metabolite	16OH-DHEAS_1	DHEA: 16OH-DHEAS_1	DHEA	Androgen		Hit reaction time SE
cc.16OH_DHEAS_1_m_32w_i_SG_GA_adj	SAB613	hitrtse	217.471	2.5361	hormone metabolite	16OH-DHEAS_1	DHEA: 16OH-DHEAS_1	DHEA	Androgen		Hit reaction time SE
cc.16OH_DHEAS_1_m_32w_i_SG_GA_adj	SAB613	hitrtse	-139.72	2.5361	hormone metabolite	16OH-DHEAS_1	DHEA: 16OH-DHEAS_1	DHEA	Androgen		Hit reaction time SE
cc.16OH_DHEAS_1_m_32w_i_SG_GA_adj	SAB614	hitrtse	-72.1634	1.07621	hormone metabolite	16OH-DHEAS_1	DHEA: 16OH-DHEAS_1	DHEA	Androgen		Hit reaction time SE
cc.16OH_DHEAS_1_m_32w_i_SG_GA_adj	SAB614	hitrtse	181.533	1.07621	hormone metabolite	16OH-DHEAS_1	DHEA: 16OH-DHEAS_1	DHEA	Androgen		Hit reaction time SE
cc.16OH_DHEAS_1_m_32w_i_SG_GA_adj	SAB614	hitrtse	159.205	1.07621	hormone metabolite	16OH-DHEAS_1	DHEA: 16OH-DHEAS_1	DHEA	Androgen		Hit reaction time SE
cc.16OH_DHEAS_1_m_32w_i_SG_GA_adj	SAB614	hitrtse	-135.91	1.07621	hormone metabolite	16OH-DHEAS_1	DHEA: 16OH-DHEAS_1	DHEA	Androgen		Hit reaction time SE
cc.16OH_DHEAS_1_m_32w_i_SG_GA_adj	SAB615	hitrtse	-126.711	0.657966	hormone metabolite	16OH-DHEAS_1	DHEA: 16OH-DHEAS_1	DHEA	Androgen		Hit reaction time SE
cc.16OH_DHEAS_1_m_32w_i_SG_GA_adj	SAB615	hitrtse	116.89	0.657966	hormone metabolite	16OH-DHEAS_1	DHEA: 16OH-DHEAS_1	DHEA	Androgen		Hit reaction time SE
cc.16OH_DHEAS_1_m_32w_i_SG_GA_adj	SAB615	hitrtse	-147.626	0.657966	hormone metabolite	16OH-DHEAS_1	DHEA: 16OH-DHEAS_1	DHEA	Androgen		Hit reaction time SE
cc.16OH_DHEAS_1_m_32w_i_SG_GA_adj	SAB615	hitrtse	71.8474	0.657966	hormone metabolite	16OH-DHEAS_1	DHEA: 16OH-DHEAS_1	DHEA	Androgen		Hit reaction time SE
cc.16OH_DHEAS_1_m_32w_i_SG_GA_adj	SAB616	hitrtse	114.292	-2.31052	hormone metabolite	16OH-DHEAS_1	DHEA: 16OH-DHEAS_1	DHEA	Androgen		Hit reaction time SE
cc.16OH_DHEAS_1_m_32w_i_SG_GA_adj	SAB616	hitrtse	204.757	-2.31052	hormone metabolite	16OH-DHEAS_1	DHEA: 16OH-DHEAS_1	DHEA	Androgen		Hit reaction time SE
cc.16OH_DHEAS_1_m_32w_i_SG_GA_adj	SAB616	hitrtse	121.816	-2.31052	hormone metabolite	16OH-DHEAS_1	DHEA: 16OH-DHEAS_1	DHEA	Androgen		Hit reaction time SE
cc.16OH_DHEAS_1_m_32w_i_SG_GA_adj	SAB616	hitrtse	-120.787	-2.31052	hormone metabolite	16OH-DHEAS_1	DHEA: 16OH-DHEAS_1	DHEA	Androgen		Hit reaction time SE
cc.16OH_DHEAS_1_m_32w_i_SG_GA_adj	SAB617	hitrtse	-192.689	0	hormone metabolite	16OH-DHEAS_1	DHEA: 16OH-DHEAS_1	DHEA	Androgen		Hit reaction time SE
cc.16OH_DHEAS_1_m_32w_i_SG_GA_adj	SAB617	hitrtse	62.9986	0	hormone metabolite	16OH-DHEAS_1	DHEA: 16OH-DHEAS_1	DHEA	Androgen		Hit reaction time SE
cc.16OH_DHEAS_1_m_32w_i_SG_GA_adj	SAB617	hitrtse	-74.7113	0	hormone metabolite	16OH-DHEAS_1	DHEA: 16OH-DHEAS_1	DHEA	Androgen		Hit reaction time SE
cc.16OH_DHEAS_1_m_32w_i_SG_GA_adj	SAB617	hitrtse	-4.67039	0	hormone metabolite	16OH-DHEAS_1	DHEA: 16OH-DHEAS_1	DHEA	Androgen		Hit reaction time SE
cc.16OH_DHEAS_1_m_32w_i_SG_GA_adj	SAB619	hitrtse	-81.0805	1.22188	hormone metabolite	16OH-DHEAS_1	DHEA: 16OH-DHEAS_1	DHEA	Androgen		Hit reaction time SE
cc.16OH_DHEAS_1_m_32w_i_SG_GA_adj	SAB619	hitrtse	62.9954	1.22188	hormone metabolite	16OH-DHEAS_1	DHEA: 16OH-DHEAS_1	DHEA	Androgen		Hit reaction time SE
cc.16OH_DHEAS_1_m_32w_i_SG_GA_adj	SAB619	hitrtse	-131.743	1.22188	hormone metabolite	16OH-DHEAS_1	DHEA: 16OH-DHEAS_1	DHEA	Androgen		Hit reaction time SE
cc.16OH_DHEAS_1_m_32w_i_SG_GA_adj	SAB619	hitrtse	83.1118	1.22188	hormone metabolite	16OH-DHEAS_1	DHEA: 16OH-DHEAS_1	DHEA	Androgen		Hit reaction time SE
cc.16OH_DHEAS_1_m_32w_i_SG_GA_adj	SAB62	hitrtse	12.616	-0.136341	hormone metabolite	16OH-DHEAS_1	DHEA: 16OH-DHEAS_1	DHEA	Androgen		Hit reaction time SE
cc.16OH_DHEAS_1_m_32w_i_SG_GA_adj	SAB62	hitrtse	241.548	-0.136341	hormone metabolite	16OH-DHEAS_1	DHEA: 16OH-DHEAS_1	DHEA	Androgen		Hit reaction time SE
cc.16OH_DHEAS_1_m_32w_i_SG_GA_adj	SAB62	hitrtse	121.17	-0.136341	hormone metabolite	16OH-DHEAS_1	DHEA: 16OH-DHEAS_1	DHEA	Androgen		Hit reaction time SE
cc.16OH_DHEAS_1_m_32w_i_SG_GA_adj	SAB620	hitrtse	-110.392	-0.0478827	hormone metabolite	16OH-DHEAS_1	DHEA: 16OH-DHEAS_1	DHEA	Androgen		Hit reaction time SE
cc.16OH_DHEAS_1_m_32w_i_SG_GA_adj	SAB620	hitrtse	92.3355	-0.0478827	hormone metabolite	16OH-DHEAS_1	DHEA: 16OH-DHEAS_1	DHEA	Androgen		Hit reaction time SE
cc.16OH_DHEAS_1_m_32w_i_SG_GA_adj	SAB620	hitrtse	-27.9115	-0.0478827	hormone metabolite	16OH-DHEAS_1	DHEA: 16OH-DHEAS_1	DHEA	Androgen		Hit reaction time SE
cc.16OH_DHEAS_1_m_32w_i_SG_GA_adj	SAB620	hitrtse	133.696	-0.0478827	hormone metabolite	16OH-DHEAS_1	DHEA: 16OH-DHEAS_1	DHEA	Androgen		Hit reaction time SE
cc.16OH_DHEAS_1_m_32w_i_SG_GA_adj	SAB621	hitrtse	-140.349	-0.148632	hormone metabolite	16OH-DHEAS_1	DHEA: 16OH-DHEAS_1	DHEA	Androgen		Hit reaction time SE
cc.16OH_DHEAS_1_m_32w_i_SG_GA_adj	SAB621	hitrtse	119.146	-0.148632	hormone metabolite	16OH-DHEAS_1	DHEA: 16OH-DHEAS_1	DHEA	Androgen		Hit reaction time SE
cc.16OH_DHEAS_1_m_32w_i_SG_GA_adj	SAB621	hitrtse	25.2769	-0.148632	hormone metabolite	16OH-DHEAS_1	DHEA: 16OH-DHEAS_1	DHEA	Androgen		Hit reaction time SE
cc.16OH_DHEAS_1_m_32w_i_SG_GA_adj	SAB621	hitrtse	165.69	-0.148632	hormone metabolite	16OH-DHEAS_1	DHEA: 16OH-DHEAS_1	DHEA	Androgen		Hit reaction time SE
cc.16OH_DHEAS_1_m_32w_i_SG_GA_adj	SAB622	hitrtse	362.036	-0.398076	hormone metabolite	16OH-DHEAS_1	DHEA: 16OH-DHEAS_1	DHEA	Androgen		Hit reaction time SE
cc.16OH_DHEAS_1_m_32w_i_SG_GA_adj	SAB622	hitrtse	115.06	-0.398076	hormone metabolite	16OH-DHEAS_1	DHEA: 16OH-DHEAS_1	DHEA	Androgen		Hit reaction time SE
cc.16OH_DHEAS_1_m_32w_i_SG_GA_adj	SAB622	hitrtse	214.161	-0.398076	hormone metabolite	16OH-DHEAS_1	DHEA: 16OH-DHEAS_1	DHEA	Androgen		Hit reaction time SE
cc.16OH_DHEAS_1_m_32w_i_SG_GA_adj	SAB623	hitrtse	-159.693	-5.63295	hormone metabolite	16OH-DHEAS_1	DHEA: 16OH-DHEAS_1	DHEA	Androgen		Hit reaction time SE
cc.16OH_DHEAS_1_m_32w_i_SG_GA_adj	SAB623	hitrtse	-86.8131	-5.63295	hormone metabolite	16OH-DHEAS_1	DHEA: 16OH-DHEAS_1	DHEA	Androgen		Hit reaction time SE
cc.16OH_DHEAS_1_m_32w_i_SG_GA_adj	SAB623	hitrtse	-39.3877	-5.63295	hormone metabolite	16OH-DHEAS_1	DHEA: 16OH-DHEAS_1	DHEA	Androgen		Hit reaction time SE
cc.16OH_DHEAS_1_m_32w_i_SG_GA_adj	SAB623	hitrtse	-114.856	-5.63295	hormone metabolite	16OH-DHEAS_1	DHEA: 16OH-DHEAS_1	DHEA	Androgen		Hit reaction time SE
cc.16OH_DHEAS_1_m_32w_i_SG_GA_adj	SAB624	hitrtse	216.124	0.383394	hormone metabolite	16OH-DHEAS_1	DHEA: 16OH-DHEAS_1	DHEA	Androgen		Hit reaction time SE
cc.16OH_DHEAS_1_m_32w_i_SG_GA_adj	SAB624	hitrtse	-139.693	0.383394	hormone metabolite	16OH-DHEAS_1	DHEA: 16OH-DHEAS_1	DHEA	Androgen		Hit reaction time SE
cc.16OH_DHEAS_1_m_32w_i_SG_GA_adj	SAB624	hitrtse	108.754	0.383394	hormone metabolite	16OH-DHEAS_1	DHEA: 16OH-DHEAS_1	DHEA	Androgen		Hit reaction time SE
cc.16OH_DHEAS_1_m_32w_i_SG_GA_adj	SAB624	hitrtse	53.2217	0.383394	hormone metabolite	16OH-DHEAS_1	DHEA: 16OH-DHEAS_1	DHEA	Androgen		Hit reaction time SE
cc.16OH_DHEAS_1_m_32w_i_SG_GA_adj	SAB627	hitrtse	79.2081	-0.459952	hormone metabolite	16OH-DHEAS_1	DHEA: 16OH-DHEAS_1	DHEA	Androgen		Hit reaction time SE
cc.16OH_DHEAS_1_m_32w_i_SG_GA_adj	SAB627	hitrtse	-162.798	-0.459952	hormone metabolite	16OH-DHEAS_1	DHEA: 16OH-DHEAS_1	DHEA	Androgen		Hit reaction time SE
cc.16OH_DHEAS_1_m_32w_i_SG_GA_adj	SAB627	hitrtse	-19.1893	-0.459952	hormone metabolite	16OH-DHEAS_1	DHEA: 16OH-DHEAS_1	DHEA	Androgen		Hit reaction time SE
cc.16OH_DHEAS_1_m_32w_i_SG_GA_adj	SAB627	hitrtse	-137.704	-0.459952	hormone metabolite	16OH-DHEAS_1	DHEA: 16OH-DHEAS_1	DHEA	Androgen		Hit reaction time SE
cc.16OH_DHEAS_1_m_32w_i_SG_GA_adj	SAB63	hitrtse	23.6078	0.684634	hormone metabolite	16OH-DHEAS_1	DHEA: 16OH-DHEAS_1	DHEA	Androgen		Hit reaction time SE
cc.16OH_DHEAS_1_m_32w_i_SG_GA_adj	SAB63	hitrtse	-159.713	0.684634	hormone metabolite	16OH-DHEAS_1	DHEA: 16OH-DHEAS_1	DHEA	Androgen		Hit reaction time SE
cc.16OH_DHEAS_1_m_32w_i_SG_GA_adj	SAB630	hitrtse	162.601	0.978482	hormone metabolite	16OH-DHEAS_1	DHEA: 16OH-DHEAS_1	DHEA	Androgen		Hit reaction time SE
cc.16OH_DHEAS_1_m_32w_i_SG_GA_adj	SAB630	hitrtse	-71.8794	0.978482	hormone metabolite	16OH-DHEAS_1	DHEA: 16OH-DHEAS_1	DHEA	Androgen		Hit reaction time SE
cc.16OH_DHEAS_1_m_32w_i_SG_GA_adj	SAB630	hitrtse	101.266	0.978482	hormone metabolite	16OH-DHEAS_1	DHEA: 16OH-DHEAS_1	DHEA	Androgen		Hit reaction time SE
cc.16OH_DHEAS_1_m_32w_i_SG_GA_adj	SAB630	hitrtse	-117.623	0.978482	hormone metabolite	16OH-DHEAS_1	DHEA: 16OH-DHEAS_1	DHEA	Androgen		Hit reaction time SE
cc.16OH_DHEAS_1_m_32w_i_SG_GA_adj	SAB631	hitrtse	122.47	0.639263	hormone metabolite	16OH-DHEAS_1	DHEA: 16OH-DHEAS_1	DHEA	Androgen		Hit reaction time SE
cc.16OH_DHEAS_1_m_32w_i_SG_GA_adj	SAB631	hitrtse	-56.5966	0.639263	hormone metabolite	16OH-DHEAS_1	DHEA: 16OH-DHEAS_1	DHEA	Androgen		Hit reaction time SE
cc.16OH_DHEAS_1_m_32w_i_SG_GA_adj	SAB631	hitrtse	-91.7258	0.639263	hormone metabolite	16OH-DHEAS_1	DHEA: 16OH-DHEAS_1	DHEA	Androgen		Hit reaction time SE
cc.16OH_DHEAS_1_m_32w_i_SG_GA_adj	SAB632	hitrtse	109.937	0.334052	hormone metabolite	16OH-DHEAS_1	DHEA: 16OH-DHEAS_1	DHEA	Androgen		Hit reaction time SE
cc.16OH_DHEAS_1_m_32w_i_SG_GA_adj	SAB632	hitrtse	222.643	0.334052	hormone metabolite	16OH-DHEAS_1	DHEA: 16OH-DHEAS_1	DHEA	Androgen		Hit reaction time SE
cc.16OH_DHEAS_1_m_32w_i_SG_GA_adj	SAB632	hitrtse	90.9204	0.334052	hormone metabolite	16OH-DHEAS_1	DHEA: 16OH-DHEAS_1	DHEA	Androgen		Hit reaction time SE
cc.16OH_DHEAS_1_m_32w_i_SG_GA_adj	SAB632	hitrtse	-138.651	0.334052	hormone metabolite	16OH-DHEAS_1	DHEA: 16OH-DHEAS_1	DHEA	Androgen		Hit reaction time SE
cc.16OH_DHEAS_1_m_32w_i_SG_GA_adj	SAB633	hitrtse	-100.398	-0.394996	hormone metabolite	16OH-DHEAS_1	DHEA: 16OH-DHEAS_1	DHEA	Androgen		Hit reaction time SE
cc.16OH_DHEAS_1_m_32w_i_SG_GA_adj	SAB634	hitrtse	11.3727	1.27067	hormone metabolite	16OH-DHEAS_1	DHEA: 16OH-DHEAS_1	DHEA	Androgen		Hit reaction time SE
cc.16OH_DHEAS_1_m_32w_i_SG_GA_adj	SAB634	hitrtse	-16.1763	1.27067	hormone metabolite	16OH-DHEAS_1	DHEA: 16OH-DHEAS_1	DHEA	Androgen		Hit reaction time SE
cc.16OH_DHEAS_1_m_32w_i_SG_GA_adj	SAB634	hitrtse	-131.844	1.27067	hormone metabolite	16OH-DHEAS_1	DHEA: 16OH-DHEAS_1	DHEA	Androgen		Hit reaction time SE
cc.16OH_DHEAS_1_m_32w_i_SG_GA_adj	SAB634	hitrtse	145.626	1.27067	hormone metabolite	16OH-DHEAS_1	DHEA: 16OH-DHEAS_1	DHEA	Androgen		Hit reaction time SE
cc.16OH_DHEAS_1_m_32w_i_SG_GA_adj	SAB636	hitrtse	-61.9085	0.791864	hormone metabolite	16OH-DHEAS_1	DHEA: 16OH-DHEAS_1	DHEA	Androgen		Hit reaction time SE
cc.16OH_DHEAS_1_m_32w_i_SG_GA_adj	SAB636	hitrtse	101.664	0.791864	hormone metabolite	16OH-DHEAS_1	DHEA: 16OH-DHEAS_1	DHEA	Androgen		Hit reaction time SE
cc.16OH_DHEAS_1_m_32w_i_SG_GA_adj	SAB636	hitrtse	173.326	0.791864	hormone metabolite	16OH-DHEAS_1	DHEA: 16OH-DHEAS_1	DHEA	Androgen		Hit reaction time SE
cc.16OH_DHEAS_1_m_32w_i_SG_GA_adj	SAB636	hitrtse	-137.548	0.791864	hormone metabolite	16OH-DHEAS_1	DHEA: 16OH-DHEAS_1	DHEA	Androgen		Hit reaction time SE
cc.16OH_DHEAS_1_m_32w_i_SG_GA_adj	SAB637	hitrtse	-89.9965	0.180976	hormone metabolite	16OH-DHEAS_1	DHEA: 16OH-DHEAS_1	DHEA	Androgen		Hit reaction time SE
cc.16OH_DHEAS_1_m_32w_i_SG_GA_adj	SAB637	hitrtse	115.88	0.180976	hormone metabolite	16OH-DHEAS_1	DHEA: 16OH-DHEAS_1	DHEA	Androgen		Hit reaction time SE
cc.16OH_DHEAS_1_m_32w_i_SG_GA_adj	SAB637	hitrtse	171.294	0.180976	hormone metabolite	16OH-DHEAS_1	DHEA: 16OH-DHEAS_1	DHEA	Androgen		Hit reaction time SE
cc.16OH_DHEAS_1_m_32w_i_SG_GA_adj	SAB638	hitrtse	-33.675	0.0164844	hormone metabolite	16OH-DHEAS_1	DHEA: 16OH-DHEAS_1	DHEA	Androgen		Hit reaction time SE
cc.16OH_DHEAS_1_m_32w_i_SG_GA_adj	SAB638	hitrtse	63.4	0.0164844	hormone metabolite	16OH-DHEAS_1	DHEA: 16OH-DHEAS_1	DHEA	Androgen		Hit reaction time SE
cc.16OH_DHEAS_1_m_32w_i_SG_GA_adj	SAB639	hitrtse	-154.159	1.26694	hormone metabolite	16OH-DHEAS_1	DHEA: 16OH-DHEAS_1	DHEA	Androgen		Hit reaction time SE
cc.16OH_DHEAS_1_m_32w_i_SG_GA_adj	SAB639	hitrtse	199.938	1.26694	hormone metabolite	16OH-DHEAS_1	DHEA: 16OH-DHEAS_1	DHEA	Androgen		Hit reaction time SE
cc.16OH_DHEAS_1_m_32w_i_SG_GA_adj	SAB639	hitrtse	-43.9492	1.26694	hormone metabolite	16OH-DHEAS_1	DHEA: 16OH-DHEAS_1	DHEA	Androgen		Hit reaction time SE
cc.16OH_DHEAS_1_m_32w_i_SG_GA_adj	SAB639	hitrtse	-8.16695	1.26694	hormone metabolite	16OH-DHEAS_1	DHEA: 16OH-DHEAS_1	DHEA	Androgen		Hit reaction time SE
cc.16OH_DHEAS_1_m_32w_i_SG_GA_adj	SAB64	hitrtse	-48.2002	0.529224	hormone metabolite	16OH-DHEAS_1	DHEA: 16OH-DHEAS_1	DHEA	Androgen		Hit reaction time SE
cc.16OH_DHEAS_1_m_32w_i_SG_GA_adj	SAB64	hitrtse	172.366	0.529224	hormone metabolite	16OH-DHEAS_1	DHEA: 16OH-DHEAS_1	DHEA	Androgen		Hit reaction time SE
cc.16OH_DHEAS_1_m_32w_i_SG_GA_adj	SAB64	hitrtse	-5.34379	0.529224	hormone metabolite	16OH-DHEAS_1	DHEA: 16OH-DHEAS_1	DHEA	Androgen		Hit reaction time SE
cc.16OH_DHEAS_1_m_32w_i_SG_GA_adj	SAB643	hitrtse	75.3333	-0.279119	hormone metabolite	16OH-DHEAS_1	DHEA: 16OH-DHEAS_1	DHEA	Androgen		Hit reaction time SE
cc.16OH_DHEAS_1_m_32w_i_SG_GA_adj	SAB643	hitrtse	222.828	-0.279119	hormone metabolite	16OH-DHEAS_1	DHEA: 16OH-DHEAS_1	DHEA	Androgen		Hit reaction time SE
cc.16OH_DHEAS_1_m_32w_i_SG_GA_adj	SAB643	hitrtse	-12.5255	-0.279119	hormone metabolite	16OH-DHEAS_1	DHEA: 16OH-DHEAS_1	DHEA	Androgen		Hit reaction time SE
cc.16OH_DHEAS_1_m_32w_i_SG_GA_adj	SAB645	hitrtse	-129.103	-2.05521	hormone metabolite	16OH-DHEAS_1	DHEA: 16OH-DHEAS_1	DHEA	Androgen		Hit reaction time SE
cc.16OH_DHEAS_1_m_32w_i_SG_GA_adj	SAB645	hitrtse	210.667	-2.05521	hormone metabolite	16OH-DHEAS_1	DHEA: 16OH-DHEAS_1	DHEA	Androgen		Hit reaction time SE
cc.16OH_DHEAS_1_m_32w_i_SG_GA_adj	SAB645	hitrtse	-102.153	-2.05521	hormone metabolite	16OH-DHEAS_1	DHEA: 16OH-DHEAS_1	DHEA	Androgen		Hit reaction time SE
cc.16OH_DHEAS_1_m_32w_i_SG_GA_adj	SAB645	hitrtse	37.2947	-2.05521	hormone metabolite	16OH-DHEAS_1	DHEA: 16OH-DHEAS_1	DHEA	Androgen		Hit reaction time SE
cc.16OH_DHEAS_1_m_32w_i_SG_GA_adj	SAB646	hitrtse	-156.504	-2.44784	hormone metabolite	16OH-DHEAS_1	DHEA: 16OH-DHEAS_1	DHEA	Androgen		Hit reaction time SE
cc.16OH_DHEAS_1_m_32w_i_SG_GA_adj	SAB646	hitrtse	-65.031	-2.44784	hormone metabolite	16OH-DHEAS_1	DHEA: 16OH-DHEAS_1	DHEA	Androgen		Hit reaction time SE
cc.16OH_DHEAS_1_m_32w_i_SG_GA_adj	SAB646	hitrtse	28.5748	-2.44784	hormone metabolite	16OH-DHEAS_1	DHEA: 16OH-DHEAS_1	DHEA	Androgen		Hit reaction time SE
cc.16OH_DHEAS_1_m_32w_i_SG_GA_adj	SAB646	hitrtse	-164.76	-2.44784	hormone metabolite	16OH-DHEAS_1	DHEA: 16OH-DHEAS_1	DHEA	Androgen		Hit reaction time SE
cc.16OH_DHEAS_1_m_32w_i_SG_GA_adj	SAB647	hitrtse	-44.9337	1.59025	hormone metabolite	16OH-DHEAS_1	DHEA: 16OH-DHEAS_1	DHEA	Androgen		Hit reaction time SE
cc.16OH_DHEAS_1_m_32w_i_SG_GA_adj	SAB647	hitrtse	75.4804	1.59025	hormone metabolite	16OH-DHEAS_1	DHEA: 16OH-DHEAS_1	DHEA	Androgen		Hit reaction time SE
cc.16OH_DHEAS_1_m_32w_i_SG_GA_adj	SAB647	hitrtse	106.02	1.59025	hormone metabolite	16OH-DHEAS_1	DHEA: 16OH-DHEAS_1	DHEA	Androgen		Hit reaction time SE
cc.16OH_DHEAS_1_m_32w_i_SG_GA_adj	SAB648	hitrtse	-118.808	-0.407573	hormone metabolite	16OH-DHEAS_1	DHEA: 16OH-DHEAS_1	DHEA	Androgen		Hit reaction time SE
cc.16OH_DHEAS_1_m_32w_i_SG_GA_adj	SAB649	hitrtse	199.753	0.000436115	hormone metabolite	16OH-DHEAS_1	DHEA: 16OH-DHEAS_1	DHEA	Androgen		Hit reaction time SE
cc.16OH_DHEAS_1_m_32w_i_SG_GA_adj	SAB649	hitrtse	394.437	0.000436115	hormone metabolite	16OH-DHEAS_1	DHEA: 16OH-DHEAS_1	DHEA	Androgen		Hit reaction time SE
cc.16OH_DHEAS_1_m_32w_i_SG_GA_adj	SAB649	hitrtse	219.76	0.000436115	hormone metabolite	16OH-DHEAS_1	DHEA: 16OH-DHEAS_1	DHEA	Androgen		Hit reaction time SE
cc.16OH_DHEAS_1_m_32w_i_SG_GA_adj	SAB650	hitrtse	123.857	-0.352178	hormone metabolite	16OH-DHEAS_1	DHEA: 16OH-DHEAS_1	DHEA	Androgen		Hit reaction time SE
cc.16OH_DHEAS_1_m_32w_i_SG_GA_adj	SAB650	hitrtse	121.888	-0.352178	hormone metabolite	16OH-DHEAS_1	DHEA: 16OH-DHEAS_1	DHEA	Androgen		Hit reaction time SE
cc.16OH_DHEAS_1_m_32w_i_SG_GA_adj	SAB650	hitrtse	92.1052	-0.352178	hormone metabolite	16OH-DHEAS_1	DHEA: 16OH-DHEAS_1	DHEA	Androgen		Hit reaction time SE
cc.16OH_DHEAS_1_m_32w_i_SG_GA_adj	SAB650	hitrtse	-136.454	-0.352178	hormone metabolite	16OH-DHEAS_1	DHEA: 16OH-DHEAS_1	DHEA	Androgen		Hit reaction time SE
cc.16OH_DHEAS_1_m_32w_i_SG_GA_adj	SAB651	hitrtse	136.791	-1.90143	hormone metabolite	16OH-DHEAS_1	DHEA: 16OH-DHEAS_1	DHEA	Androgen		Hit reaction time SE
cc.16OH_DHEAS_1_m_32w_i_SG_GA_adj	SAB651	hitrtse	-22.0365	-1.90143	hormone metabolite	16OH-DHEAS_1	DHEA: 16OH-DHEAS_1	DHEA	Androgen		Hit reaction time SE
cc.16OH_DHEAS_1_m_32w_i_SG_GA_adj	SAB651	hitrtse	-142.839	-1.90143	hormone metabolite	16OH-DHEAS_1	DHEA: 16OH-DHEAS_1	DHEA	Androgen		Hit reaction time SE
cc.16OH_DHEAS_1_m_32w_i_SG_GA_adj	SAB651	hitrtse	23.599	-1.90143	hormone metabolite	16OH-DHEAS_1	DHEA: 16OH-DHEAS_1	DHEA	Androgen		Hit reaction time SE
cc.16OH_DHEAS_1_m_32w_i_SG_GA_adj	SAB652	hitrtse	216.022	-0.94899	hormone metabolite	16OH-DHEAS_1	DHEA: 16OH-DHEAS_1	DHEA	Androgen		Hit reaction time SE
cc.16OH_DHEAS_1_m_32w_i_SG_GA_adj	SAB652	hitrtse	-154.57	-0.94899	hormone metabolite	16OH-DHEAS_1	DHEA: 16OH-DHEAS_1	DHEA	Androgen		Hit reaction time SE
cc.16OH_DHEAS_1_m_32w_i_SG_GA_adj	SAB652	hitrtse	30.2399	-0.94899	hormone metabolite	16OH-DHEAS_1	DHEA: 16OH-DHEAS_1	DHEA	Androgen		Hit reaction time SE
cc.16OH_DHEAS_1_m_32w_i_SG_GA_adj	SAB652	hitrtse	267.195	-0.94899	hormone metabolite	16OH-DHEAS_1	DHEA: 16OH-DHEAS_1	DHEA	Androgen		Hit reaction time SE
cc.16OH_DHEAS_1_m_32w_i_SG_GA_adj	SAB653	hitrtse	108.69	-0.190562	hormone metabolite	16OH-DHEAS_1	DHEA: 16OH-DHEAS_1	DHEA	Androgen		Hit reaction time SE
cc.16OH_DHEAS_1_m_32w_i_SG_GA_adj	SAB653	hitrtse	-76.5723	-0.190562	hormone metabolite	16OH-DHEAS_1	DHEA: 16OH-DHEAS_1	DHEA	Androgen		Hit reaction time SE
cc.16OH_DHEAS_1_m_32w_i_SG_GA_adj	SAB653	hitrtse	186.792	-0.190562	hormone metabolite	16OH-DHEAS_1	DHEA: 16OH-DHEAS_1	DHEA	Androgen		Hit reaction time SE
cc.16OH_DHEAS_1_m_32w_i_SG_GA_adj	SAB655	hitrtse	-9.01791	-0.751612	hormone metabolite	16OH-DHEAS_1	DHEA: 16OH-DHEAS_1	DHEA	Androgen		Hit reaction time SE
cc.16OH_DHEAS_1_m_32w_i_SG_GA_adj	SAB655	hitrtse	-28.7229	-0.751612	hormone metabolite	16OH-DHEAS_1	DHEA: 16OH-DHEAS_1	DHEA	Androgen		Hit reaction time SE
cc.16OH_DHEAS_1_m_32w_i_SG_GA_adj	SAB655	hitrtse	131.926	-0.751612	hormone metabolite	16OH-DHEAS_1	DHEA: 16OH-DHEAS_1	DHEA	Androgen		Hit reaction time SE
cc.16OH_DHEAS_1_m_32w_i_SG_GA_adj	SAB655	hitrtse	-145.017	-0.751612	hormone metabolite	16OH-DHEAS_1	DHEA: 16OH-DHEAS_1	DHEA	Androgen		Hit reaction time SE
cc.16OH_DHEAS_1_m_32w_i_SG_GA_adj	SAB657	hitrtse	-139.134	-1.50311	hormone metabolite	16OH-DHEAS_1	DHEA: 16OH-DHEAS_1	DHEA	Androgen		Hit reaction time SE
cc.16OH_DHEAS_1_m_32w_i_SG_GA_adj	SAB657	hitrtse	41.3894	-1.50311	hormone metabolite	16OH-DHEAS_1	DHEA: 16OH-DHEAS_1	DHEA	Androgen		Hit reaction time SE
cc.16OH_DHEAS_1_m_32w_i_SG_GA_adj	SAB657	hitrtse	72.4835	-1.50311	hormone metabolite	16OH-DHEAS_1	DHEA: 16OH-DHEAS_1	DHEA	Androgen		Hit reaction time SE
cc.16OH_DHEAS_1_m_32w_i_SG_GA_adj	SAB66	hitrtse	93.0179	0.529304	hormone metabolite	16OH-DHEAS_1	DHEA: 16OH-DHEAS_1	DHEA	Androgen		Hit reaction time SE
cc.16OH_DHEAS_1_m_32w_i_SG_GA_adj	SAB66	hitrtse	260.301	0.529304	hormone metabolite	16OH-DHEAS_1	DHEA: 16OH-DHEAS_1	DHEA	Androgen		Hit reaction time SE
cc.16OH_DHEAS_1_m_32w_i_SG_GA_adj	SAB66	hitrtse	201.68	0.529304	hormone metabolite	16OH-DHEAS_1	DHEA: 16OH-DHEAS_1	DHEA	Androgen		Hit reaction time SE
cc.16OH_DHEAS_1_m_32w_i_SG_GA_adj	SAB67	hitrtse	154.391	1.46727	hormone metabolite	16OH-DHEAS_1	DHEA: 16OH-DHEAS_1	DHEA	Androgen		Hit reaction time SE
cc.16OH_DHEAS_1_m_32w_i_SG_GA_adj	SAB67	hitrtse	-73.4814	1.46727	hormone metabolite	16OH-DHEAS_1	DHEA: 16OH-DHEAS_1	DHEA	Androgen		Hit reaction time SE
cc.16OH_DHEAS_1_m_32w_i_SG_GA_adj	SAB67	hitrtse	-107.913	1.46727	hormone metabolite	16OH-DHEAS_1	DHEA: 16OH-DHEAS_1	DHEA	Androgen		Hit reaction time SE
cc.16OH_DHEAS_1_m_32w_i_SG_GA_adj	SAB69	hitrtse	-63.029	1.43918	hormone metabolite	16OH-DHEAS_1	DHEA: 16OH-DHEAS_1	DHEA	Androgen		Hit reaction time SE
cc.16OH_DHEAS_1_m_32w_i_SG_GA_adj	SAB69	hitrtse	-60.015	1.43918	hormone metabolite	16OH-DHEAS_1	DHEA: 16OH-DHEAS_1	DHEA	Androgen		Hit reaction time SE
cc.16OH_DHEAS_1_m_32w_i_SG_GA_adj	SAB69	hitrtse	19.603	1.43918	hormone metabolite	16OH-DHEAS_1	DHEA: 16OH-DHEAS_1	DHEA	Androgen		Hit reaction time SE
cc.16OH_DHEAS_1_m_32w_i_SG_GA_adj	SAB71	hitrtse	-173.72	-0.23498	hormone metabolite	16OH-DHEAS_1	DHEA: 16OH-DHEAS_1	DHEA	Androgen		Hit reaction time SE
cc.16OH_DHEAS_1_m_32w_i_SG_GA_adj	SAB71	hitrtse	172.153	-0.23498	hormone metabolite	16OH-DHEAS_1	DHEA: 16OH-DHEAS_1	DHEA	Androgen		Hit reaction time SE
cc.16OH_DHEAS_1_m_32w_i_SG_GA_adj	SAB73	hitrtse	128.418	0.589926	hormone metabolite	16OH-DHEAS_1	DHEA: 16OH-DHEAS_1	DHEA	Androgen		Hit reaction time SE
cc.16OH_DHEAS_1_m_32w_i_SG_GA_adj	SAB73	hitrtse	143.933	0.589926	hormone metabolite	16OH-DHEAS_1	DHEA: 16OH-DHEAS_1	DHEA	Androgen		Hit reaction time SE
cc.16OH_DHEAS_1_m_32w_i_SG_GA_adj	SAB73	hitrtse	-30.8983	0.589926	hormone metabolite	16OH-DHEAS_1	DHEA: 16OH-DHEAS_1	DHEA	Androgen		Hit reaction time SE
cc.16OH_DHEAS_1_m_32w_i_SG_GA_adj	SAB75	hitrtse	15.8305	0.0535011	hormone metabolite	16OH-DHEAS_1	DHEA: 16OH-DHEAS_1	DHEA	Androgen		Hit reaction time SE
cc.16OH_DHEAS_1_m_32w_i_SG_GA_adj	SAB75	hitrtse	140.103	0.0535011	hormone metabolite	16OH-DHEAS_1	DHEA: 16OH-DHEAS_1	DHEA	Androgen		Hit reaction time SE
cc.16OH_DHEAS_1_m_32w_i_SG_GA_adj	SAB76	hitrtse	173.157	1.35608	hormone metabolite	16OH-DHEAS_1	DHEA: 16OH-DHEAS_1	DHEA	Androgen		Hit reaction time SE
cc.16OH_DHEAS_1_m_32w_i_SG_GA_adj	SAB78	hitrtse	-170.853	1.33546	hormone metabolite	16OH-DHEAS_1	DHEA: 16OH-DHEAS_1	DHEA	Androgen		Hit reaction time SE
cc.16OH_DHEAS_1_m_32w_i_SG_GA_adj	SAB78	hitrtse	192.693	1.33546	hormone metabolite	16OH-DHEAS_1	DHEA: 16OH-DHEAS_1	DHEA	Androgen		Hit reaction time SE
cc.16OH_DHEAS_1_m_32w_i_SG_GA_adj	SAB78	hitrtse	-34.6283	1.33546	hormone metabolite	16OH-DHEAS_1	DHEA: 16OH-DHEAS_1	DHEA	Androgen		Hit reaction time SE
cc.16OH_DHEAS_1_m_32w_i_SG_GA_adj	SAB79	hitrtse	117.414	0.160912	hormone metabolite	16OH-DHEAS_1	DHEA: 16OH-DHEAS_1	DHEA	Androgen		Hit reaction time SE
cc.16OH_DHEAS_1_m_32w_i_SG_GA_adj	SAB79	hitrtse	180.189	0.160912	hormone metabolite	16OH-DHEAS_1	DHEA: 16OH-DHEAS_1	DHEA	Androgen		Hit reaction time SE
cc.16OH_DHEAS_1_m_32w_i_SG_GA_adj	SAB79	hitrtse	-15.34	0.160912	hormone metabolite	16OH-DHEAS_1	DHEA: 16OH-DHEAS_1	DHEA	Androgen		Hit reaction time SE
cc.16OH_DHEAS_1_m_32w_i_SG_GA_adj	SAB8	hitrtse	-26.9806	0.855286	hormone metabolite	16OH-DHEAS_1	DHEA: 16OH-DHEAS_1	DHEA	Androgen		Hit reaction time SE
cc.16OH_DHEAS_1_m_32w_i_SG_GA_adj	SAB8	hitrtse	-177.546	0.855286	hormone metabolite	16OH-DHEAS_1	DHEA: 16OH-DHEAS_1	DHEA	Androgen		Hit reaction time SE
cc.16OH_DHEAS_1_m_32w_i_SG_GA_adj	SAB8	hitrtse	-65.0888	0.855286	hormone metabolite	16OH-DHEAS_1	DHEA: 16OH-DHEAS_1	DHEA	Androgen		Hit reaction time SE
cc.16OH_DHEAS_1_m_32w_i_SG_GA_adj	SAB80	hitrtse	-38.7246	-0.232019	hormone metabolite	16OH-DHEAS_1	DHEA: 16OH-DHEAS_1	DHEA	Androgen		Hit reaction time SE
cc.16OH_DHEAS_1_m_32w_i_SG_GA_adj	SAB80	hitrtse	198.684	-0.232019	hormone metabolite	16OH-DHEAS_1	DHEA: 16OH-DHEAS_1	DHEA	Androgen		Hit reaction time SE
cc.16OH_DHEAS_1_m_32w_i_SG_GA_adj	SAB81	hitrtse	-142.491	-0.495635	hormone metabolite	16OH-DHEAS_1	DHEA: 16OH-DHEAS_1	DHEA	Androgen		Hit reaction time SE
cc.16OH_DHEAS_1_m_32w_i_SG_GA_adj	SAB81	hitrtse	17.6176	-0.495635	hormone metabolite	16OH-DHEAS_1	DHEA: 16OH-DHEAS_1	DHEA	Androgen		Hit reaction time SE
cc.16OH_DHEAS_1_m_32w_i_SG_GA_adj	SAB81	hitrtse	-16.5265	-0.495635	hormone metabolite	16OH-DHEAS_1	DHEA: 16OH-DHEAS_1	DHEA	Androgen		Hit reaction time SE
cc.16OH_DHEAS_1_m_32w_i_SG_GA_adj	SAB82	hitrtse	-6.01268	-2.60975	hormone metabolite	16OH-DHEAS_1	DHEA: 16OH-DHEAS_1	DHEA	Androgen		Hit reaction time SE
cc.16OH_DHEAS_1_m_32w_i_SG_GA_adj	SAB82	hitrtse	-119.789	-2.60975	hormone metabolite	16OH-DHEAS_1	DHEA: 16OH-DHEAS_1	DHEA	Androgen		Hit reaction time SE
cc.16OH_DHEAS_1_m_32w_i_SG_GA_adj	SAB82	hitrtse	-60.5533	-2.60975	hormone metabolite	16OH-DHEAS_1	DHEA: 16OH-DHEAS_1	DHEA	Androgen		Hit reaction time SE
cc.16OH_DHEAS_1_m_32w_i_SG_GA_adj	SAB83	hitrtse	34.5984	-4.67515	hormone metabolite	16OH-DHEAS_1	DHEA: 16OH-DHEAS_1	DHEA	Androgen		Hit reaction time SE
cc.16OH_DHEAS_1_m_32w_i_SG_GA_adj	SAB83	hitrtse	-106.198	-4.67515	hormone metabolite	16OH-DHEAS_1	DHEA: 16OH-DHEAS_1	DHEA	Androgen		Hit reaction time SE
cc.16OH_DHEAS_1_m_32w_i_SG_GA_adj	SAB84	hitrtse	109.364	-0.231909	hormone metabolite	16OH-DHEAS_1	DHEA: 16OH-DHEAS_1	DHEA	Androgen		Hit reaction time SE
cc.16OH_DHEAS_1_m_32w_i_SG_GA_adj	SAB84	hitrtse	88.719	-0.231909	hormone metabolite	16OH-DHEAS_1	DHEA: 16OH-DHEAS_1	DHEA	Androgen		Hit reaction time SE
cc.16OH_DHEAS_1_m_32w_i_SG_GA_adj	SAB84	hitrtse	115.882	-0.231909	hormone metabolite	16OH-DHEAS_1	DHEA: 16OH-DHEAS_1	DHEA	Androgen		Hit reaction time SE
cc.16OH_DHEAS_1_m_32w_i_SG_GA_adj	SAB85	hitrtse	164.294	2.32165	hormone metabolite	16OH-DHEAS_1	DHEA: 16OH-DHEAS_1	DHEA	Androgen		Hit reaction time SE
cc.16OH_DHEAS_1_m_32w_i_SG_GA_adj	SAB85	hitrtse	42.6018	2.32165	hormone metabolite	16OH-DHEAS_1	DHEA: 16OH-DHEAS_1	DHEA	Androgen		Hit reaction time SE
cc.16OH_DHEAS_1_m_32w_i_SG_GA_adj	SAB85	hitrtse	-121.039	2.32165	hormone metabolite	16OH-DHEAS_1	DHEA: 16OH-DHEAS_1	DHEA	Androgen		Hit reaction time SE
cc.16OH_DHEAS_1_m_32w_i_SG_GA_adj	SAB86	hitrtse	-129.451	0.171989	hormone metabolite	16OH-DHEAS_1	DHEA: 16OH-DHEAS_1	DHEA	Androgen		Hit reaction time SE
cc.16OH_DHEAS_1_m_32w_i_SG_GA_adj	SAB86	hitrtse	54.6822	0.171989	hormone metabolite	16OH-DHEAS_1	DHEA: 16OH-DHEAS_1	DHEA	Androgen		Hit reaction time SE
cc.16OH_DHEAS_1_m_32w_i_SG_GA_adj	SAB86	hitrtse	72.9209	0.171989	hormone metabolite	16OH-DHEAS_1	DHEA: 16OH-DHEAS_1	DHEA	Androgen		Hit reaction time SE
cc.16OH_DHEAS_1_m_32w_i_SG_GA_adj	SAB88	hitrtse	-35.6113	0.888798	hormone metabolite	16OH-DHEAS_1	DHEA: 16OH-DHEAS_1	DHEA	Androgen		Hit reaction time SE
cc.16OH_DHEAS_1_m_32w_i_SG_GA_adj	SAB88	hitrtse	159.904	0.888798	hormone metabolite	16OH-DHEAS_1	DHEA: 16OH-DHEAS_1	DHEA	Androgen		Hit reaction time SE
cc.16OH_DHEAS_1_m_32w_i_SG_GA_adj	SAB88	hitrtse	171.265	0.888798	hormone metabolite	16OH-DHEAS_1	DHEA: 16OH-DHEAS_1	DHEA	Androgen		Hit reaction time SE
cc.16OH_DHEAS_1_m_32w_i_SG_GA_adj	SAB89	hitrtse	-18.6246	-0.57396	hormone metabolite	16OH-DHEAS_1	DHEA: 16OH-DHEAS_1	DHEA	Androgen		Hit reaction time SE
cc.16OH_DHEAS_1_m_32w_i_SG_GA_adj	SAB89	hitrtse	146.458	-0.57396	hormone metabolite	16OH-DHEAS_1	DHEA: 16OH-DHEAS_1	DHEA	Androgen		Hit reaction time SE
cc.16OH_DHEAS_1_m_32w_i_SG_GA_adj	SAB89	hitrtse	97.726	-0.57396	hormone metabolite	16OH-DHEAS_1	DHEA: 16OH-DHEAS_1	DHEA	Androgen		Hit reaction time SE
cc.16OH_DHEAS_1_m_32w_i_SG_GA_adj	SAB9	hitrtse	148.348	1.41796	hormone metabolite	16OH-DHEAS_1	DHEA: 16OH-DHEAS_1	DHEA	Androgen		Hit reaction time SE
cc.16OH_DHEAS_1_m_32w_i_SG_GA_adj	SAB90	hitrtse	-90.1009	1.77549	hormone metabolite	16OH-DHEAS_1	DHEA: 16OH-DHEAS_1	DHEA	Androgen		Hit reaction time SE
cc.16OH_DHEAS_1_m_32w_i_SG_GA_adj	SAB90	hitrtse	-42.5104	1.77549	hormone metabolite	16OH-DHEAS_1	DHEA: 16OH-DHEAS_1	DHEA	Androgen		Hit reaction time SE
cc.16OH_DHEAS_1_m_32w_i_SG_GA_adj	SAB90	hitrtse	-162.604	1.77549	hormone metabolite	16OH-DHEAS_1	DHEA: 16OH-DHEAS_1	DHEA	Androgen		Hit reaction time SE
cc.16OH_DHEAS_1_m_32w_i_SG_GA_adj	SAB91	hitrtse	-32.3986	-1.83915	hormone metabolite	16OH-DHEAS_1	DHEA: 16OH-DHEAS_1	DHEA	Androgen		Hit reaction time SE
cc.16OH_DHEAS_1_m_32w_i_SG_GA_adj	SAB91	hitrtse	-51.6528	-1.83915	hormone metabolite	16OH-DHEAS_1	DHEA: 16OH-DHEAS_1	DHEA	Androgen		Hit reaction time SE
cc.16OH_DHEAS_1_m_32w_i_SG_GA_adj	SAB91	hitrtse	-70.1485	-1.83915	hormone metabolite	16OH-DHEAS_1	DHEA: 16OH-DHEAS_1	DHEA	Androgen		Hit reaction time SE
cc.16OH_DHEAS_1_m_32w_i_SG_GA_adj	SAB93	hitrtse	-13.8832	-0.110506	hormone metabolite	16OH-DHEAS_1	DHEA: 16OH-DHEAS_1	DHEA	Androgen		Hit reaction time SE
cc.16OH_DHEAS_1_m_32w_i_SG_GA_adj	SAB93	hitrtse	92.9381	-0.110506	hormone metabolite	16OH-DHEAS_1	DHEA: 16OH-DHEAS_1	DHEA	Androgen		Hit reaction time SE
cc.16OH_DHEAS_1_m_32w_i_SG_GA_adj	SAB93	hitrtse	-136.198	-0.110506	hormone metabolite	16OH-DHEAS_1	DHEA: 16OH-DHEAS_1	DHEA	Androgen		Hit reaction time SE
cc.16OH_DHEAS_1_m_32w_i_SG_GA_adj	SAB97	hitrtse	-114.58	0.0779971	hormone metabolite	16OH-DHEAS_1	DHEA: 16OH-DHEAS_1	DHEA	Androgen		Hit reaction time SE
cc.16OH_DHEAS_1_m_32w_i_SG_GA_adj	SAB97	hitrtse	-48.4922	0.0779971	hormone metabolite	16OH-DHEAS_1	DHEA: 16OH-DHEAS_1	DHEA	Androgen		Hit reaction time SE
cc.16OH_DHEAS_1_m_32w_i_SG_GA_adj	SAB97	hitrtse	69.0607	0.0779971	hormone metabolite	16OH-DHEAS_1	DHEA: 16OH-DHEAS_1	DHEA	Androgen		Hit reaction time SE
cc.16OH_DHEAS_1_m_32w_i_SG_GA_adj	SAB98	hitrtse	134.305	-0.22189	hormone metabolite	16OH-DHEAS_1	DHEA: 16OH-DHEAS_1	DHEA	Androgen		Hit reaction time SE
cc.16OH_DHEAS_1_m_32w_i_SG_GA_adj	SAB98	hitrtse	-109.06	-0.22189	hormone metabolite	16OH-DHEAS_1	DHEA: 16OH-DHEAS_1	DHEA	Androgen		Hit reaction time SE
cc.16OH_DHEAS_1_m_32w_i_SG_GA_adj	SAB98	hitrtse	-25.6912	-0.22189	hormone metabolite	16OH-DHEAS_1	DHEA: 16OH-DHEAS_1	DHEA	Androgen		Hit reaction time SE
cc.16OH_DHEAS_1_m_32w_i_SG_GA_adj	SAB1	motor	-11.8796	-0.521845	hormone metabolite	16OH-DHEAS_1	DHEA: 16OH-DHEAS_1	DHEA	Androgen		Early motor skills
cc.16OH_DHEAS_1_m_32w_i_SG_GA_adj	SAB1	motor	14.9918	-0.521845	hormone metabolite	16OH-DHEAS_1	DHEA: 16OH-DHEAS_1	DHEA	Androgen		Early motor skills
cc.16OH_DHEAS_1_m_32w_i_SG_GA_adj	SAB10	motor	22.2697	1.7409	hormone metabolite	16OH-DHEAS_1	DHEA: 16OH-DHEAS_1	DHEA	Androgen		Early motor skills
cc.16OH_DHEAS_1_m_32w_i_SG_GA_adj	SAB10	motor	-3.84762	1.7409	hormone metabolite	16OH-DHEAS_1	DHEA: 16OH-DHEAS_1	DHEA	Androgen		Early motor skills
cc.16OH_DHEAS_1_m_32w_i_SG_GA_adj	SAB100	motor	9.77143	0.697627	hormone metabolite	16OH-DHEAS_1	DHEA: 16OH-DHEAS_1	DHEA	Androgen		Early motor skills
cc.16OH_DHEAS_1_m_32w_i_SG_GA_adj	SAB100	motor	6.05127	0.697627	hormone metabolite	16OH-DHEAS_1	DHEA: 16OH-DHEAS_1	DHEA	Androgen		Early motor skills
cc.16OH_DHEAS_1_m_32w_i_SG_GA_adj	SAB102	motor	-5.97626	-0.146065	hormone metabolite	16OH-DHEAS_1	DHEA: 16OH-DHEAS_1	DHEA	Androgen		Early motor skills
cc.16OH_DHEAS_1_m_32w_i_SG_GA_adj	SAB102	motor	0.844053	-0.146065	hormone metabolite	16OH-DHEAS_1	DHEA: 16OH-DHEAS_1	DHEA	Androgen		Early motor skills
cc.16OH_DHEAS_1_m_32w_i_SG_GA_adj	SAB105	motor	-1.12235	0.162425	hormone metabolite	16OH-DHEAS_1	DHEA: 16OH-DHEAS_1	DHEA	Androgen		Early motor skills
cc.16OH_DHEAS_1_m_32w_i_SG_GA_adj	SAB105	motor	-12.0648	0.162425	hormone metabolite	16OH-DHEAS_1	DHEA: 16OH-DHEAS_1	DHEA	Androgen		Early motor skills
cc.16OH_DHEAS_1_m_32w_i_SG_GA_adj	SAB106	motor	15.6161	-0.617229	hormone metabolite	16OH-DHEAS_1	DHEA: 16OH-DHEAS_1	DHEA	Androgen		Early motor skills
cc.16OH_DHEAS_1_m_32w_i_SG_GA_adj	SAB106	motor	23.268	-0.617229	hormone metabolite	16OH-DHEAS_1	DHEA: 16OH-DHEAS_1	DHEA	Androgen		Early motor skills
cc.16OH_DHEAS_1_m_32w_i_SG_GA_adj	SAB107	motor	-7.04228	0.369004	hormone metabolite	16OH-DHEAS_1	DHEA: 16OH-DHEAS_1	DHEA	Androgen		Early motor skills
cc.16OH_DHEAS_1_m_32w_i_SG_GA_adj	SAB109	motor	-1.83456	0.197549	hormone metabolite	16OH-DHEAS_1	DHEA: 16OH-DHEAS_1	DHEA	Androgen		Early motor skills
cc.16OH_DHEAS_1_m_32w_i_SG_GA_adj	SAB110	motor	5.04772	0.472973	hormone metabolite	16OH-DHEAS_1	DHEA: 16OH-DHEAS_1	DHEA	Androgen		Early motor skills
cc.16OH_DHEAS_1_m_32w_i_SG_GA_adj	SAB110	motor	-15.1532	0.472973	hormone metabolite	16OH-DHEAS_1	DHEA: 16OH-DHEAS_1	DHEA	Androgen		Early motor skills
cc.16OH_DHEAS_1_m_32w_i_SG_GA_adj	SAB111	motor	17.981	2.17401	hormone metabolite	16OH-DHEAS_1	DHEA: 16OH-DHEAS_1	DHEA	Androgen		Early motor skills
cc.16OH_DHEAS_1_m_32w_i_SG_GA_adj	SAB111	motor	-9.18995	2.17401	hormone metabolite	16OH-DHEAS_1	DHEA: 16OH-DHEAS_1	DHEA	Androgen		Early motor skills
cc.16OH_DHEAS_1_m_32w_i_SG_GA_adj	SAB112	motor	0.796692	-0.64448	hormone metabolite	16OH-DHEAS_1	DHEA: 16OH-DHEAS_1	DHEA	Androgen		Early motor skills
cc.16OH_DHEAS_1_m_32w_i_SG_GA_adj	SAB112	motor	28.702	-0.64448	hormone metabolite	16OH-DHEAS_1	DHEA: 16OH-DHEAS_1	DHEA	Androgen		Early motor skills
cc.16OH_DHEAS_1_m_32w_i_SG_GA_adj	SAB113	motor	5.80693	-1.10837	hormone metabolite	16OH-DHEAS_1	DHEA: 16OH-DHEAS_1	DHEA	Androgen		Early motor skills
cc.16OH_DHEAS_1_m_32w_i_SG_GA_adj	SAB113	motor	-7.97228	-1.10837	hormone metabolite	16OH-DHEAS_1	DHEA: 16OH-DHEAS_1	DHEA	Androgen		Early motor skills
cc.16OH_DHEAS_1_m_32w_i_SG_GA_adj	SAB115	motor	-3.08555	-0.477892	hormone metabolite	16OH-DHEAS_1	DHEA: 16OH-DHEAS_1	DHEA	Androgen		Early motor skills
cc.16OH_DHEAS_1_m_32w_i_SG_GA_adj	SAB115	motor	19.457	-0.477892	hormone metabolite	16OH-DHEAS_1	DHEA: 16OH-DHEAS_1	DHEA	Androgen		Early motor skills
cc.16OH_DHEAS_1_m_32w_i_SG_GA_adj	SAB116	motor	-13.5759	-0.640253	hormone metabolite	16OH-DHEAS_1	DHEA: 16OH-DHEAS_1	DHEA	Androgen		Early motor skills
cc.16OH_DHEAS_1_m_32w_i_SG_GA_adj	SAB116	motor	-5.99966	-0.640253	hormone metabolite	16OH-DHEAS_1	DHEA: 16OH-DHEAS_1	DHEA	Androgen		Early motor skills
cc.16OH_DHEAS_1_m_32w_i_SG_GA_adj	SAB117	motor	29.8008	-1.72979	hormone metabolite	16OH-DHEAS_1	DHEA: 16OH-DHEAS_1	DHEA	Androgen		Early motor skills
cc.16OH_DHEAS_1_m_32w_i_SG_GA_adj	SAB117	motor	-7.394	-1.72979	hormone metabolite	16OH-DHEAS_1	DHEA: 16OH-DHEAS_1	DHEA	Androgen		Early motor skills
cc.16OH_DHEAS_1_m_32w_i_SG_GA_adj	SAB118	motor	-9.14351	1.34307	hormone metabolite	16OH-DHEAS_1	DHEA: 16OH-DHEAS_1	DHEA	Androgen		Early motor skills
cc.16OH_DHEAS_1_m_32w_i_SG_GA_adj	SAB118	motor	11.791	1.34307	hormone metabolite	16OH-DHEAS_1	DHEA: 16OH-DHEAS_1	DHEA	Androgen		Early motor skills
cc.16OH_DHEAS_1_m_32w_i_SG_GA_adj	SAB119	motor	19.8738	0.872863	hormone metabolite	16OH-DHEAS_1	DHEA: 16OH-DHEAS_1	DHEA	Androgen		Early motor skills
cc.16OH_DHEAS_1_m_32w_i_SG_GA_adj	SAB119	motor	-6.53689	0.872863	hormone metabolite	16OH-DHEAS_1	DHEA: 16OH-DHEAS_1	DHEA	Androgen		Early motor skills
cc.16OH_DHEAS_1_m_32w_i_SG_GA_adj	SAB12	motor	-29.0658	-1.67198	hormone metabolite	16OH-DHEAS_1	DHEA: 16OH-DHEAS_1	DHEA	Androgen		Early motor skills
cc.16OH_DHEAS_1_m_32w_i_SG_GA_adj	SAB120	motor	-10.6364	-2.49016	hormone metabolite	16OH-DHEAS_1	DHEA: 16OH-DHEAS_1	DHEA	Androgen		Early motor skills
cc.16OH_DHEAS_1_m_32w_i_SG_GA_adj	SAB120	motor	-2.28363	-2.49016	hormone metabolite	16OH-DHEAS_1	DHEA: 16OH-DHEAS_1	DHEA	Androgen		Early motor skills
cc.16OH_DHEAS_1_m_32w_i_SG_GA_adj	SAB121	motor	-16.5991	0.40438	hormone metabolite	16OH-DHEAS_1	DHEA: 16OH-DHEAS_1	DHEA	Androgen		Early motor skills
cc.16OH_DHEAS_1_m_32w_i_SG_GA_adj	SAB121	motor	1.33479	0.40438	hormone metabolite	16OH-DHEAS_1	DHEA: 16OH-DHEAS_1	DHEA	Androgen		Early motor skills
cc.16OH_DHEAS_1_m_32w_i_SG_GA_adj	SAB122	motor	18.8641	0.167707	hormone metabolite	16OH-DHEAS_1	DHEA: 16OH-DHEAS_1	DHEA	Androgen		Early motor skills
cc.16OH_DHEAS_1_m_32w_i_SG_GA_adj	SAB123	motor	-4.67214	1.67639	hormone metabolite	16OH-DHEAS_1	DHEA: 16OH-DHEAS_1	DHEA	Androgen		Early motor skills
cc.16OH_DHEAS_1_m_32w_i_SG_GA_adj	SAB123	motor	9.39877	1.67639	hormone metabolite	16OH-DHEAS_1	DHEA: 16OH-DHEAS_1	DHEA	Androgen		Early motor skills
cc.16OH_DHEAS_1_m_32w_i_SG_GA_adj	SAB125	motor	15.8898	-0.0464213	hormone metabolite	16OH-DHEAS_1	DHEA: 16OH-DHEAS_1	DHEA	Androgen		Early motor skills
cc.16OH_DHEAS_1_m_32w_i_SG_GA_adj	SAB126	motor	1.0886	-2.18158	hormone metabolite	16OH-DHEAS_1	DHEA: 16OH-DHEAS_1	DHEA	Androgen		Early motor skills
cc.16OH_DHEAS_1_m_32w_i_SG_GA_adj	SAB128	motor	-7.13501	0.269897	hormone metabolite	16OH-DHEAS_1	DHEA: 16OH-DHEAS_1	DHEA	Androgen		Early motor skills
cc.16OH_DHEAS_1_m_32w_i_SG_GA_adj	SAB128	motor	1.96686	0.269897	hormone metabolite	16OH-DHEAS_1	DHEA: 16OH-DHEAS_1	DHEA	Androgen		Early motor skills
cc.16OH_DHEAS_1_m_32w_i_SG_GA_adj	SAB129	motor	13.3793	0.935438	hormone metabolite	16OH-DHEAS_1	DHEA: 16OH-DHEAS_1	DHEA	Androgen		Early motor skills
cc.16OH_DHEAS_1_m_32w_i_SG_GA_adj	SAB129	motor	-2.21124	0.935438	hormone metabolite	16OH-DHEAS_1	DHEA: 16OH-DHEAS_1	DHEA	Androgen		Early motor skills
cc.16OH_DHEAS_1_m_32w_i_SG_GA_adj	SAB13	motor	8.24803	1.38324	hormone metabolite	16OH-DHEAS_1	DHEA: 16OH-DHEAS_1	DHEA	Androgen		Early motor skills
cc.16OH_DHEAS_1_m_32w_i_SG_GA_adj	SAB13	motor	8.12238	1.38324	hormone metabolite	16OH-DHEAS_1	DHEA: 16OH-DHEAS_1	DHEA	Androgen		Early motor skills
cc.16OH_DHEAS_1_m_32w_i_SG_GA_adj	SAB130	motor	21.5349	1.30445	hormone metabolite	16OH-DHEAS_1	DHEA: 16OH-DHEAS_1	DHEA	Androgen		Early motor skills
cc.16OH_DHEAS_1_m_32w_i_SG_GA_adj	SAB130	motor	-17.2439	1.30445	hormone metabolite	16OH-DHEAS_1	DHEA: 16OH-DHEAS_1	DHEA	Androgen		Early motor skills
cc.16OH_DHEAS_1_m_32w_i_SG_GA_adj	SAB131	motor	5.62838	-3.50843	hormone metabolite	16OH-DHEAS_1	DHEA: 16OH-DHEAS_1	DHEA	Androgen		Early motor skills
cc.16OH_DHEAS_1_m_32w_i_SG_GA_adj	SAB131	motor	-2.27481	-3.50843	hormone metabolite	16OH-DHEAS_1	DHEA: 16OH-DHEAS_1	DHEA	Androgen		Early motor skills
cc.16OH_DHEAS_1_m_32w_i_SG_GA_adj	SAB132	motor	-11.745	0.663999	hormone metabolite	16OH-DHEAS_1	DHEA: 16OH-DHEAS_1	DHEA	Androgen		Early motor skills
cc.16OH_DHEAS_1_m_32w_i_SG_GA_adj	SAB132	motor	5.40976	0.663999	hormone metabolite	16OH-DHEAS_1	DHEA: 16OH-DHEAS_1	DHEA	Androgen		Early motor skills
cc.16OH_DHEAS_1_m_32w_i_SG_GA_adj	SAB133	motor	-26.4189	1.91417	hormone metabolite	16OH-DHEAS_1	DHEA: 16OH-DHEAS_1	DHEA	Androgen		Early motor skills
cc.16OH_DHEAS_1_m_32w_i_SG_GA_adj	SAB134	motor	-7.65746	-2.60583	hormone metabolite	16OH-DHEAS_1	DHEA: 16OH-DHEAS_1	DHEA	Androgen		Early motor skills
cc.16OH_DHEAS_1_m_32w_i_SG_GA_adj	SAB135	motor	8.51216	0.259575	hormone metabolite	16OH-DHEAS_1	DHEA: 16OH-DHEAS_1	DHEA	Androgen		Early motor skills
cc.16OH_DHEAS_1_m_32w_i_SG_GA_adj	SAB136	motor	10.6272	-0.557348	hormone metabolite	16OH-DHEAS_1	DHEA: 16OH-DHEAS_1	DHEA	Androgen		Early motor skills
cc.16OH_DHEAS_1_m_32w_i_SG_GA_adj	SAB136	motor	14.7318	-0.557348	hormone metabolite	16OH-DHEAS_1	DHEA: 16OH-DHEAS_1	DHEA	Androgen		Early motor skills
cc.16OH_DHEAS_1_m_32w_i_SG_GA_adj	SAB138	motor	-0.375452	0.923806	hormone metabolite	16OH-DHEAS_1	DHEA: 16OH-DHEAS_1	DHEA	Androgen		Early motor skills
cc.16OH_DHEAS_1_m_32w_i_SG_GA_adj	SAB138	motor	8.98721	0.923806	hormone metabolite	16OH-DHEAS_1	DHEA: 16OH-DHEAS_1	DHEA	Androgen		Early motor skills
cc.16OH_DHEAS_1_m_32w_i_SG_GA_adj	SAB139	motor	-1.39375	1.34496	hormone metabolite	16OH-DHEAS_1	DHEA: 16OH-DHEAS_1	DHEA	Androgen		Early motor skills
cc.16OH_DHEAS_1_m_32w_i_SG_GA_adj	SAB139	motor	8.74376	1.34496	hormone metabolite	16OH-DHEAS_1	DHEA: 16OH-DHEAS_1	DHEA	Androgen		Early motor skills
cc.16OH_DHEAS_1_m_32w_i_SG_GA_adj	SAB14	motor	-13.0449	-0.476205	hormone metabolite	16OH-DHEAS_1	DHEA: 16OH-DHEAS_1	DHEA	Androgen		Early motor skills
cc.16OH_DHEAS_1_m_32w_i_SG_GA_adj	SAB14	motor	-15.9764	-0.476205	hormone metabolite	16OH-DHEAS_1	DHEA: 16OH-DHEAS_1	DHEA	Androgen		Early motor skills
cc.16OH_DHEAS_1_m_32w_i_SG_GA_adj	SAB142	motor	-6.47698	-1.1461	hormone metabolite	16OH-DHEAS_1	DHEA: 16OH-DHEAS_1	DHEA	Androgen		Early motor skills
cc.16OH_DHEAS_1_m_32w_i_SG_GA_adj	SAB142	motor	-4.31854	-1.1461	hormone metabolite	16OH-DHEAS_1	DHEA: 16OH-DHEAS_1	DHEA	Androgen		Early motor skills
cc.16OH_DHEAS_1_m_32w_i_SG_GA_adj	SAB143	motor	-7.39718	-1.24072	hormone metabolite	16OH-DHEAS_1	DHEA: 16OH-DHEAS_1	DHEA	Androgen		Early motor skills
cc.16OH_DHEAS_1_m_32w_i_SG_GA_adj	SAB144	motor	3.53213	1.28454	hormone metabolite	16OH-DHEAS_1	DHEA: 16OH-DHEAS_1	DHEA	Androgen		Early motor skills
cc.16OH_DHEAS_1_m_32w_i_SG_GA_adj	SAB144	motor	7.3167	1.28454	hormone metabolite	16OH-DHEAS_1	DHEA: 16OH-DHEAS_1	DHEA	Androgen		Early motor skills
cc.16OH_DHEAS_1_m_32w_i_SG_GA_adj	SAB146	motor	2.31892	-3.54393	hormone metabolite	16OH-DHEAS_1	DHEA: 16OH-DHEAS_1	DHEA	Androgen		Early motor skills
cc.16OH_DHEAS_1_m_32w_i_SG_GA_adj	SAB148	motor	-10.2366	-0.626368	hormone metabolite	16OH-DHEAS_1	DHEA: 16OH-DHEAS_1	DHEA	Androgen		Early motor skills
cc.16OH_DHEAS_1_m_32w_i_SG_GA_adj	SAB150	motor	2.32221	0.364364	hormone metabolite	16OH-DHEAS_1	DHEA: 16OH-DHEAS_1	DHEA	Androgen		Early motor skills
cc.16OH_DHEAS_1_m_32w_i_SG_GA_adj	SAB150	motor	-15.6109	0.364364	hormone metabolite	16OH-DHEAS_1	DHEA: 16OH-DHEAS_1	DHEA	Androgen		Early motor skills
cc.16OH_DHEAS_1_m_32w_i_SG_GA_adj	SAB152	motor	6.78796	-4.38107	hormone metabolite	16OH-DHEAS_1	DHEA: 16OH-DHEAS_1	DHEA	Androgen		Early motor skills
cc.16OH_DHEAS_1_m_32w_i_SG_GA_adj	SAB153	motor	-1.41732	0.896975	hormone metabolite	16OH-DHEAS_1	DHEA: 16OH-DHEAS_1	DHEA	Androgen		Early motor skills
cc.16OH_DHEAS_1_m_32w_i_SG_GA_adj	SAB154	motor	-7.9072	-0.0999572	hormone metabolite	16OH-DHEAS_1	DHEA: 16OH-DHEAS_1	DHEA	Androgen		Early motor skills
cc.16OH_DHEAS_1_m_32w_i_SG_GA_adj	SAB154	motor	10.7431	-0.0999572	hormone metabolite	16OH-DHEAS_1	DHEA: 16OH-DHEAS_1	DHEA	Androgen		Early motor skills
cc.16OH_DHEAS_1_m_32w_i_SG_GA_adj	SAB155	motor	-2.77086	-2.89471	hormone metabolite	16OH-DHEAS_1	DHEA: 16OH-DHEAS_1	DHEA	Androgen		Early motor skills
cc.16OH_DHEAS_1_m_32w_i_SG_GA_adj	SAB155	motor	-7.27183	-2.89471	hormone metabolite	16OH-DHEAS_1	DHEA: 16OH-DHEAS_1	DHEA	Androgen		Early motor skills
cc.16OH_DHEAS_1_m_32w_i_SG_GA_adj	SAB156	motor	4.02019	0.150234	hormone metabolite	16OH-DHEAS_1	DHEA: 16OH-DHEAS_1	DHEA	Androgen		Early motor skills
cc.16OH_DHEAS_1_m_32w_i_SG_GA_adj	SAB157	motor	4.918	0.189419	hormone metabolite	16OH-DHEAS_1	DHEA: 16OH-DHEAS_1	DHEA	Androgen		Early motor skills
cc.16OH_DHEAS_1_m_32w_i_SG_GA_adj	SAB157	motor	1.68529	0.189419	hormone metabolite	16OH-DHEAS_1	DHEA: 16OH-DHEAS_1	DHEA	Androgen		Early motor skills
cc.16OH_DHEAS_1_m_32w_i_SG_GA_adj	SAB158	motor	20.5468	-0.141303	hormone metabolite	16OH-DHEAS_1	DHEA: 16OH-DHEAS_1	DHEA	Androgen		Early motor skills
cc.16OH_DHEAS_1_m_32w_i_SG_GA_adj	SAB158	motor	5.31065	-0.141303	hormone metabolite	16OH-DHEAS_1	DHEA: 16OH-DHEAS_1	DHEA	Androgen		Early motor skills
cc.16OH_DHEAS_1_m_32w_i_SG_GA_adj	SAB159	motor	-19.3772	0.51028	hormone metabolite	16OH-DHEAS_1	DHEA: 16OH-DHEAS_1	DHEA	Androgen		Early motor skills
cc.16OH_DHEAS_1_m_32w_i_SG_GA_adj	SAB159	motor	-21.921	0.51028	hormone metabolite	16OH-DHEAS_1	DHEA: 16OH-DHEAS_1	DHEA	Androgen		Early motor skills
cc.16OH_DHEAS_1_m_32w_i_SG_GA_adj	SAB16	motor	-9.88055	-0.47059	hormone metabolite	16OH-DHEAS_1	DHEA: 16OH-DHEAS_1	DHEA	Androgen		Early motor skills
cc.16OH_DHEAS_1_m_32w_i_SG_GA_adj	SAB16	motor	-5.05519	-0.47059	hormone metabolite	16OH-DHEAS_1	DHEA: 16OH-DHEAS_1	DHEA	Androgen		Early motor skills
cc.16OH_DHEAS_1_m_32w_i_SG_GA_adj	SAB160	motor	-0.224169	-0.719204	hormone metabolite	16OH-DHEAS_1	DHEA: 16OH-DHEAS_1	DHEA	Androgen		Early motor skills
cc.16OH_DHEAS_1_m_32w_i_SG_GA_adj	SAB160	motor	4.99669	-0.719204	hormone metabolite	16OH-DHEAS_1	DHEA: 16OH-DHEAS_1	DHEA	Androgen		Early motor skills
cc.16OH_DHEAS_1_m_32w_i_SG_GA_adj	SAB161	motor	6.31367	0.862653	hormone metabolite	16OH-DHEAS_1	DHEA: 16OH-DHEAS_1	DHEA	Androgen		Early motor skills
cc.16OH_DHEAS_1_m_32w_i_SG_GA_adj	SAB161	motor	5.02365	0.862653	hormone metabolite	16OH-DHEAS_1	DHEA: 16OH-DHEAS_1	DHEA	Androgen		Early motor skills
cc.16OH_DHEAS_1_m_32w_i_SG_GA_adj	SAB162	motor	9.2265	0.877146	hormone metabolite	16OH-DHEAS_1	DHEA: 16OH-DHEAS_1	DHEA	Androgen		Early motor skills
cc.16OH_DHEAS_1_m_32w_i_SG_GA_adj	SAB162	motor	3.21362	0.877146	hormone metabolite	16OH-DHEAS_1	DHEA: 16OH-DHEAS_1	DHEA	Androgen		Early motor skills
cc.16OH_DHEAS_1_m_32w_i_SG_GA_adj	SAB163	motor	-21.0684	1.61454	hormone metabolite	16OH-DHEAS_1	DHEA: 16OH-DHEAS_1	DHEA	Androgen		Early motor skills
cc.16OH_DHEAS_1_m_32w_i_SG_GA_adj	SAB163	motor	13.8543	1.61454	hormone metabolite	16OH-DHEAS_1	DHEA: 16OH-DHEAS_1	DHEA	Androgen		Early motor skills
cc.16OH_DHEAS_1_m_32w_i_SG_GA_adj	SAB164	motor	2.24282	1.36809	hormone metabolite	16OH-DHEAS_1	DHEA: 16OH-DHEAS_1	DHEA	Androgen		Early motor skills
cc.16OH_DHEAS_1_m_32w_i_SG_GA_adj	SAB166	motor	-22.1104	0.132556	hormone metabolite	16OH-DHEAS_1	DHEA: 16OH-DHEAS_1	DHEA	Androgen		Early motor skills
cc.16OH_DHEAS_1_m_32w_i_SG_GA_adj	SAB166	motor	-1.07025	0.132556	hormone metabolite	16OH-DHEAS_1	DHEA: 16OH-DHEAS_1	DHEA	Androgen		Early motor skills
cc.16OH_DHEAS_1_m_32w_i_SG_GA_adj	SAB167	motor	-13.2516	0.283006	hormone metabolite	16OH-DHEAS_1	DHEA: 16OH-DHEAS_1	DHEA	Androgen		Early motor skills
cc.16OH_DHEAS_1_m_32w_i_SG_GA_adj	SAB167	motor	12.4117	0.283006	hormone metabolite	16OH-DHEAS_1	DHEA: 16OH-DHEAS_1	DHEA	Androgen		Early motor skills
cc.16OH_DHEAS_1_m_32w_i_SG_GA_adj	SAB168	motor	-14.1794	-4.08222	hormone metabolite	16OH-DHEAS_1	DHEA: 16OH-DHEAS_1	DHEA	Androgen		Early motor skills
cc.16OH_DHEAS_1_m_32w_i_SG_GA_adj	SAB168	motor	-4.74021	-4.08222	hormone metabolite	16OH-DHEAS_1	DHEA: 16OH-DHEAS_1	DHEA	Androgen		Early motor skills
cc.16OH_DHEAS_1_m_32w_i_SG_GA_adj	SAB169	motor	-7.45007	1.29634	hormone metabolite	16OH-DHEAS_1	DHEA: 16OH-DHEAS_1	DHEA	Androgen		Early motor skills
cc.16OH_DHEAS_1_m_32w_i_SG_GA_adj	SAB169	motor	13.6167	1.29634	hormone metabolite	16OH-DHEAS_1	DHEA: 16OH-DHEAS_1	DHEA	Androgen		Early motor skills
cc.16OH_DHEAS_1_m_32w_i_SG_GA_adj	SAB17	motor	10.9428	1.56372	hormone metabolite	16OH-DHEAS_1	DHEA: 16OH-DHEAS_1	DHEA	Androgen		Early motor skills
cc.16OH_DHEAS_1_m_32w_i_SG_GA_adj	SAB17	motor	-7.77197	1.56372	hormone metabolite	16OH-DHEAS_1	DHEA: 16OH-DHEAS_1	DHEA	Androgen		Early motor skills
cc.16OH_DHEAS_1_m_32w_i_SG_GA_adj	SAB170	motor	6.586	-3.5312	hormone metabolite	16OH-DHEAS_1	DHEA: 16OH-DHEAS_1	DHEA	Androgen		Early motor skills
cc.16OH_DHEAS_1_m_32w_i_SG_GA_adj	SAB170	motor	-7.11591	-3.5312	hormone metabolite	16OH-DHEAS_1	DHEA: 16OH-DHEAS_1	DHEA	Androgen		Early motor skills
cc.16OH_DHEAS_1_m_32w_i_SG_GA_adj	SAB171	motor	-5.50513	-0.420697	hormone metabolite	16OH-DHEAS_1	DHEA: 16OH-DHEAS_1	DHEA	Androgen		Early motor skills
cc.16OH_DHEAS_1_m_32w_i_SG_GA_adj	SAB171	motor	6.99208	-0.420697	hormone metabolite	16OH-DHEAS_1	DHEA: 16OH-DHEAS_1	DHEA	Androgen		Early motor skills
cc.16OH_DHEAS_1_m_32w_i_SG_GA_adj	SAB172	motor	-6.53597	-0.585975	hormone metabolite	16OH-DHEAS_1	DHEA: 16OH-DHEAS_1	DHEA	Androgen		Early motor skills
cc.16OH_DHEAS_1_m_32w_i_SG_GA_adj	SAB172	motor	-0.1936	-0.585975	hormone metabolite	16OH-DHEAS_1	DHEA: 16OH-DHEAS_1	DHEA	Androgen		Early motor skills
cc.16OH_DHEAS_1_m_32w_i_SG_GA_adj	SAB173	motor	24.3303	-4.0231	hormone metabolite	16OH-DHEAS_1	DHEA: 16OH-DHEAS_1	DHEA	Androgen		Early motor skills
cc.16OH_DHEAS_1_m_32w_i_SG_GA_adj	SAB173	motor	-4.01525	-4.0231	hormone metabolite	16OH-DHEAS_1	DHEA: 16OH-DHEAS_1	DHEA	Androgen		Early motor skills
cc.16OH_DHEAS_1_m_32w_i_SG_GA_adj	SAB174	motor	-6.19704	-0.601362	hormone metabolite	16OH-DHEAS_1	DHEA: 16OH-DHEAS_1	DHEA	Androgen		Early motor skills
cc.16OH_DHEAS_1_m_32w_i_SG_GA_adj	SAB175	motor	-14.8272	-4.45312	hormone metabolite	16OH-DHEAS_1	DHEA: 16OH-DHEAS_1	DHEA	Androgen		Early motor skills
cc.16OH_DHEAS_1_m_32w_i_SG_GA_adj	SAB175	motor	13.605	-4.45312	hormone metabolite	16OH-DHEAS_1	DHEA: 16OH-DHEAS_1	DHEA	Androgen		Early motor skills
cc.16OH_DHEAS_1_m_32w_i_SG_GA_adj	SAB176	motor	-37.9406	-0.322848	hormone metabolite	16OH-DHEAS_1	DHEA: 16OH-DHEAS_1	DHEA	Androgen		Early motor skills
cc.16OH_DHEAS_1_m_32w_i_SG_GA_adj	SAB176	motor	5.51125	-0.322848	hormone metabolite	16OH-DHEAS_1	DHEA: 16OH-DHEAS_1	DHEA	Androgen		Early motor skills
cc.16OH_DHEAS_1_m_32w_i_SG_GA_adj	SAB177	motor	16.2494	-1.03575	hormone metabolite	16OH-DHEAS_1	DHEA: 16OH-DHEAS_1	DHEA	Androgen		Early motor skills
cc.16OH_DHEAS_1_m_32w_i_SG_GA_adj	SAB178	motor	-12.7703	-3.9571	hormone metabolite	16OH-DHEAS_1	DHEA: 16OH-DHEAS_1	DHEA	Androgen		Early motor skills
cc.16OH_DHEAS_1_m_32w_i_SG_GA_adj	SAB178	motor	-27.9634	-3.9571	hormone metabolite	16OH-DHEAS_1	DHEA: 16OH-DHEAS_1	DHEA	Androgen		Early motor skills
cc.16OH_DHEAS_1_m_32w_i_SG_GA_adj	SAB18	motor	-30.6695	-1.59702	hormone metabolite	16OH-DHEAS_1	DHEA: 16OH-DHEAS_1	DHEA	Androgen		Early motor skills
cc.16OH_DHEAS_1_m_32w_i_SG_GA_adj	SAB18	motor	-42.8757	-1.59702	hormone metabolite	16OH-DHEAS_1	DHEA: 16OH-DHEAS_1	DHEA	Androgen		Early motor skills
cc.16OH_DHEAS_1_m_32w_i_SG_GA_adj	SAB180	motor	1.82909	-1.26326	hormone metabolite	16OH-DHEAS_1	DHEA: 16OH-DHEAS_1	DHEA	Androgen		Early motor skills
cc.16OH_DHEAS_1_m_32w_i_SG_GA_adj	SAB180	motor	-11.4876	-1.26326	hormone metabolite	16OH-DHEAS_1	DHEA: 16OH-DHEAS_1	DHEA	Androgen		Early motor skills
cc.16OH_DHEAS_1_m_32w_i_SG_GA_adj	SAB181	motor	-0.689694	1.70692	hormone metabolite	16OH-DHEAS_1	DHEA: 16OH-DHEAS_1	DHEA	Androgen		Early motor skills
cc.16OH_DHEAS_1_m_32w_i_SG_GA_adj	SAB181	motor	18.7561	1.70692	hormone metabolite	16OH-DHEAS_1	DHEA: 16OH-DHEAS_1	DHEA	Androgen		Early motor skills
cc.16OH_DHEAS_1_m_32w_i_SG_GA_adj	SAB183	motor	-10.5937	-0.649647	hormone metabolite	16OH-DHEAS_1	DHEA: 16OH-DHEAS_1	DHEA	Androgen		Early motor skills
cc.16OH_DHEAS_1_m_32w_i_SG_GA_adj	SAB183	motor	-20.8069	-0.649647	hormone metabolite	16OH-DHEAS_1	DHEA: 16OH-DHEAS_1	DHEA	Androgen		Early motor skills
cc.16OH_DHEAS_1_m_32w_i_SG_GA_adj	SAB184	motor	-10.5814	-0.087424	hormone metabolite	16OH-DHEAS_1	DHEA: 16OH-DHEAS_1	DHEA	Androgen		Early motor skills
cc.16OH_DHEAS_1_m_32w_i_SG_GA_adj	SAB184	motor	-1.14395	-0.087424	hormone metabolite	16OH-DHEAS_1	DHEA: 16OH-DHEAS_1	DHEA	Androgen		Early motor skills
cc.16OH_DHEAS_1_m_32w_i_SG_GA_adj	SAB185	motor	5.58771	1.27565	hormone metabolite	16OH-DHEAS_1	DHEA: 16OH-DHEAS_1	DHEA	Androgen		Early motor skills
cc.16OH_DHEAS_1_m_32w_i_SG_GA_adj	SAB185	motor	-7.69552	1.27565	hormone metabolite	16OH-DHEAS_1	DHEA: 16OH-DHEAS_1	DHEA	Androgen		Early motor skills
cc.16OH_DHEAS_1_m_32w_i_SG_GA_adj	SAB186	motor	9.28431	0.255632	hormone metabolite	16OH-DHEAS_1	DHEA: 16OH-DHEAS_1	DHEA	Androgen		Early motor skills
cc.16OH_DHEAS_1_m_32w_i_SG_GA_adj	SAB187	motor	0.368173	1.72598	hormone metabolite	16OH-DHEAS_1	DHEA: 16OH-DHEAS_1	DHEA	Androgen		Early motor skills
cc.16OH_DHEAS_1_m_32w_i_SG_GA_adj	SAB187	motor	-0.219149	1.72598	hormone metabolite	16OH-DHEAS_1	DHEA: 16OH-DHEAS_1	DHEA	Androgen		Early motor skills
cc.16OH_DHEAS_1_m_32w_i_SG_GA_adj	SAB188	motor	5.84445	-0.106543	hormone metabolite	16OH-DHEAS_1	DHEA: 16OH-DHEAS_1	DHEA	Androgen		Early motor skills
cc.16OH_DHEAS_1_m_32w_i_SG_GA_adj	SAB188	motor	-4.37035	-0.106543	hormone metabolite	16OH-DHEAS_1	DHEA: 16OH-DHEAS_1	DHEA	Androgen		Early motor skills
cc.16OH_DHEAS_1_m_32w_i_SG_GA_adj	SAB189	motor	-4.21164	-0.541022	hormone metabolite	16OH-DHEAS_1	DHEA: 16OH-DHEAS_1	DHEA	Androgen		Early motor skills
cc.16OH_DHEAS_1_m_32w_i_SG_GA_adj	SAB189	motor	-2.16485	-0.541022	hormone metabolite	16OH-DHEAS_1	DHEA: 16OH-DHEAS_1	DHEA	Androgen		Early motor skills
cc.16OH_DHEAS_1_m_32w_i_SG_GA_adj	SAB190	motor	-18.9681	0.671083	hormone metabolite	16OH-DHEAS_1	DHEA: 16OH-DHEAS_1	DHEA	Androgen		Early motor skills
cc.16OH_DHEAS_1_m_32w_i_SG_GA_adj	SAB190	motor	-18.7788	0.671083	hormone metabolite	16OH-DHEAS_1	DHEA: 16OH-DHEAS_1	DHEA	Androgen		Early motor skills
cc.16OH_DHEAS_1_m_32w_i_SG_GA_adj	SAB191	motor	-5.65683	0.263593	hormone metabolite	16OH-DHEAS_1	DHEA: 16OH-DHEAS_1	DHEA	Androgen		Early motor skills
cc.16OH_DHEAS_1_m_32w_i_SG_GA_adj	SAB191	motor	1.10508	0.263593	hormone metabolite	16OH-DHEAS_1	DHEA: 16OH-DHEAS_1	DHEA	Androgen		Early motor skills
cc.16OH_DHEAS_1_m_32w_i_SG_GA_adj	SAB193	motor	1.77629	0.82715	hormone metabolite	16OH-DHEAS_1	DHEA: 16OH-DHEAS_1	DHEA	Androgen		Early motor skills
cc.16OH_DHEAS_1_m_32w_i_SG_GA_adj	SAB194	motor	-15.6352	-1.28354	hormone metabolite	16OH-DHEAS_1	DHEA: 16OH-DHEAS_1	DHEA	Androgen		Early motor skills
cc.16OH_DHEAS_1_m_32w_i_SG_GA_adj	SAB194	motor	4.70056	-1.28354	hormone metabolite	16OH-DHEAS_1	DHEA: 16OH-DHEAS_1	DHEA	Androgen		Early motor skills
cc.16OH_DHEAS_1_m_32w_i_SG_GA_adj	SAB195	motor	-10.3309	0.274833	hormone metabolite	16OH-DHEAS_1	DHEA: 16OH-DHEAS_1	DHEA	Androgen		Early motor skills
cc.16OH_DHEAS_1_m_32w_i_SG_GA_adj	SAB195	motor	13.0182	0.274833	hormone metabolite	16OH-DHEAS_1	DHEA: 16OH-DHEAS_1	DHEA	Androgen		Early motor skills
cc.16OH_DHEAS_1_m_32w_i_SG_GA_adj	SAB196	motor	0.686718	-1.86287	hormone metabolite	16OH-DHEAS_1	DHEA: 16OH-DHEAS_1	DHEA	Androgen		Early motor skills
cc.16OH_DHEAS_1_m_32w_i_SG_GA_adj	SAB196	motor	-7.63602	-1.86287	hormone metabolite	16OH-DHEAS_1	DHEA: 16OH-DHEAS_1	DHEA	Androgen		Early motor skills
cc.16OH_DHEAS_1_m_32w_i_SG_GA_adj	SAB197	motor	10.9293	-1.06561	hormone metabolite	16OH-DHEAS_1	DHEA: 16OH-DHEAS_1	DHEA	Androgen		Early motor skills
cc.16OH_DHEAS_1_m_32w_i_SG_GA_adj	SAB197	motor	8.843	-1.06561	hormone metabolite	16OH-DHEAS_1	DHEA: 16OH-DHEAS_1	DHEA	Androgen		Early motor skills
cc.16OH_DHEAS_1_m_32w_i_SG_GA_adj	SAB198	motor	-2.33905	-0.321548	hormone metabolite	16OH-DHEAS_1	DHEA: 16OH-DHEAS_1	DHEA	Androgen		Early motor skills
cc.16OH_DHEAS_1_m_32w_i_SG_GA_adj	SAB198	motor	-16.8304	-0.321548	hormone metabolite	16OH-DHEAS_1	DHEA: 16OH-DHEAS_1	DHEA	Androgen		Early motor skills
cc.16OH_DHEAS_1_m_32w_i_SG_GA_adj	SAB199	motor	-7.69518	-0.959016	hormone metabolite	16OH-DHEAS_1	DHEA: 16OH-DHEAS_1	DHEA	Androgen		Early motor skills
cc.16OH_DHEAS_1_m_32w_i_SG_GA_adj	SAB199	motor	4.93	-0.959016	hormone metabolite	16OH-DHEAS_1	DHEA: 16OH-DHEAS_1	DHEA	Androgen		Early motor skills
cc.16OH_DHEAS_1_m_32w_i_SG_GA_adj	SAB2	motor	-14.9014	-0.912303	hormone metabolite	16OH-DHEAS_1	DHEA: 16OH-DHEAS_1	DHEA	Androgen		Early motor skills
cc.16OH_DHEAS_1_m_32w_i_SG_GA_adj	SAB2	motor	13.0891	-0.912303	hormone metabolite	16OH-DHEAS_1	DHEA: 16OH-DHEAS_1	DHEA	Androgen		Early motor skills
cc.16OH_DHEAS_1_m_32w_i_SG_GA_adj	SAB20	motor	15.1132	-0.263788	hormone metabolite	16OH-DHEAS_1	DHEA: 16OH-DHEAS_1	DHEA	Androgen		Early motor skills
cc.16OH_DHEAS_1_m_32w_i_SG_GA_adj	SAB20	motor	-20.0907	-0.263788	hormone metabolite	16OH-DHEAS_1	DHEA: 16OH-DHEAS_1	DHEA	Androgen		Early motor skills
cc.16OH_DHEAS_1_m_32w_i_SG_GA_adj	SAB200	motor	-4.98209	-0.136399	hormone metabolite	16OH-DHEAS_1	DHEA: 16OH-DHEAS_1	DHEA	Androgen		Early motor skills
[truncated: 636,506+ more rows]

## Sheet: ST4-C
ST4-C: INMA-Sabadell - Sex stratified linear mixed-effects models for prenatal steroid hormone exposure-neurodevelopment associations
[truncated: 1,441 more rows]

[truncated: 4 more sheets: ST4-D, ST4-E, ST4-F, ST4-G]
